# Supplementary material
Source: Research Square preprint supplement (doi:10.21203/rs.3.rs-8903639/v1)
Supplement: Supplementary file 1 [file 26bdf3db2dd99cbfdd67af54.xlsx]

## Sheet: Metadata
Small lake and pond	Description
No	Sample No
Name	Site name
Country	Country
Ecosystem_type	Ecosystem type defined for this study (Text S1)
Methaneflux_mgCH4m2d1	Daily methane flux (mg CH4 m-2 d-1)
Methaneflux_gch4m2yr1	Estimated Yearly methane flux (mg CH4 m-2 d-1)
Aggregated_flux	Number of site being aggregrated
Lat	Latitude
Lon	Longitude
DiffCH4_Flux	Diffusive CH4 flux (mg CH4 m-2 d-1)
EbCH4_Flux	Ebullitive CH4 flux (mg CH4 m-2 d-1)
Area_km2	Surface area of site (km2)
Depth	Water depth of the site (m)
Pathway	Methane pathway measured
Exclude	Exclusion of data for analysis
Estimated_icefree_days	Estimated ice-free days from NOAA
Lake_type	Lake type defined by source, BP: beaver pond, PP: peatland pond, GP: glacial/post-glacial, TH: thermokarst,T: Temperate, TR = Tropical/subtrophical, U: unspecified
Catchment_landcover	Landcover near the catchment area (Taillardat et al., 2024)
Trophic_level	Trophic level defined by source (Rosentretert et al., 2021)
Reference	Author name and year published
Source	Source of data
Full ref	Full reference
Lake	Description
No	Sample No
Name	Site name
Country	Country
Ecosystem_type	Ecosystem type defined for this study (Text S1)
Lake_type	Lake type defined by source, TH = Thermokarst, GP = Glacial/post-glacial, PP = Peat Pond, B = Other Boreal, T = Temperate, TR = Tropical/subtrophical
Methaneflux_mgCH4m2d1	Daily methane flux (mg CH4 m-2 d-1)
Methaneflux_gch4m2yr1	Estimated Yearly methane flux (mg CH4 m-2 d-1)
Aggregrated_flux	Number of site being aggregrated
Lat	Latitude
Lon	Longitude
DiffCH4_Flux	Diffusive CH4 flux (mg CH4 m-2 d-1)
EbCH4_Flux	Ebullitive CH4 flux (mg CH4 m-2 d-1)
Area_km2	Surface area of site (km2)
Depth	Water depth of the site (m)
Pathway	Methane pathway measured
Icefree_days_BAWLD	Ice-free days in accordance with BAWLD dataset
Exclude	Exclusion of data for analysis
Estimated_icefree_days	Estimated ice-free days from NOAA
Trophic_level	Trophic level defined by source (Rosentretert et al., 2021)
Reference	Author name and year published
Source	Source of data
Full ref	Full reference
Reservoir	Description
No	Sample No
Name	Site name
Country	Country of the study site
Ecosystem_type	Ecosystem type defined for this study (Text S1)
Methaneflux_mgCH4m2d1	Daily methane flux (mg CH4 m-2 d-1)
Methaneflux_gch4m2yr1	Estimated Yearly methane flux (mg CH4 m-2 d-1)
Aggregrated_flux	Number of site being aggregrated
Lat	Latitude
Lon	Longitude
DiffCH4_Flux	Diffusive CH4 flux (mg CH4 m-2 d-1)
EbCH4_Flux	Ebullitive CH4 flux (mg CH4 m-2 d-1)
Pathway	Methane pathway measured
Exclude	Exclusion of data for analysis
Estimated_icefree_days	Estimated ice-free days from NOAA
Trophic_level	Trophic level defined by source (Rosentretert et al., 2021)
Reference	Author name and year published
Source	Source of data
Full citation	Full citation
Inland wetland	Description
No	Sample No
Name	Site name
Country	Country of the study site
Ecosystem_type	Ecosystem type defined for this study (Text S1)
SiteName	Detail site name
Class_BAWLD	Wetland class based on BAWLD landcover classification, Bog, Fen, Marsh, PermBog (Permafrost Bog) (Olefeldt et al., 2021)
Ecosystem_BAWLD	Ecosystem class defined by BAWLD
WetlandClass_treat	Werland Class based on Treat et al., 2018
combined_class	Ecosystem class combined treat with BAWLD
methaneflux_mgCH4m2d1	Daily methane flux (mg CH4 m-2 d-1)
methaneflux_gch4m2yr1	Annual methane flux (g CH4 m-2 d-1)
Aggregrated flux	Number of site being aggregrated
nongrowingseason_flux	Non growing season methane flux (g CH4 m-2 d-1)
lat	Latitude
lon	Longitude
Growingseason	Length of growing season
measured_estimated_flux	Method of annual flux reported
Reference	Author name and year published
Source	Source of data
Full_ref	Full reference
River	Description
No	Sample No
Name	Site name
Country	Country
Ecosystem_type	Ecosystem type defined for this study (Text S1)
Methaneflux_mgCH4m2d1	Daily methane flux (mg CH4 m-2 d-1)
Methaneflux_mgCH4m2d1_sd	Standard deviation of methane flux (mg CH4 m-2 d-1)
Methaneflux_gch4m2yr1	Annual Methane flux (g CH4 m-2 d-1)
Aggregated_flux	Number of observation being aggregrated
Lat	Latitude
Lon	Longitude
Pathway	Methane pathway measured
Exclude	Exclusion of data for analysis
Channel_type	Channel type defined by source
Estimated_icefree_days	Estimated ice-free days from NOAA
Site Name	Site name provided by source
Basin_region	Basin region of study ste provided by source
Reference	Author name and year published
Source	Source of data
DOI	DOI of the data
Tidal marsh	Description
No	Sample No
Name	Site name
Country	Country
Ecosystem_type	Ecosystem type defined for this study (Text S1)
Wetland_class	Wetland class provided by source
Methaneflux_mgCH4m2d1	Daily methane flux (mg CH4 m-2 d-1)
Methaneflux_gch4m2yr1	Annual methane flux (g CH4 m-2 d-1)
Lat	Latitude
Lon	Longitude
Interface	Methane interface measurement
Salinity	Salinity of study site provided by source
Impact_class	Disturbance level of study sites provided by source
Reference	Author name and year published
Source	Source of data
Estimated_flux_measure	Method of annual flux reported
Method	Methane flux measurement method
Full citation	Full citation
Mangrove	Description
No	Sample No
Name	Site name
Country	Country
Ecosystem_type	Ecosystem type defined for this study (Text S1)
Methaneflux_mgCH4m2d1	Daily methane flux (mg CH4 m-2 d-1)
Lat	Latitude
Lon	Longitude
Interface	Methane interface measurement (air, sediment-water, air-water)
Reference	Author name and year published
Source	Source of data
Method	Methane flux measurement method
Salinity	Salinity given by the source
Full citation	Full citation
Seagrass	Description
No	Sample No
Name	Site name
Country	Country
Ecosystem_type	Ecosystem type defined for this study (Text S1)
Methaneflux_mgCH4m2d1	Daily methane flux (mg CH4 m-2 d-1)
Lat	Latitude
Lon	Longitude
Interface	Methane interface measurement
Exclude	Exclusion of data for analysis
Seagrass_condition	Condition of seagrass studied
Site	Site description
Reference	Author name and year published
Source	Source of data
Full citation	Full citation
Estuary	Description
No	Sample No
Name	Site name
Country	Country
Ecosystem_type	Ecosystem type defined for this study (Text S1)
Methaneflux_mgCH4m2d1	Daily methane flux (mg CH4 m-2 d-1)
Lat	Latitude
Lon	Longitude
Interface	Methane flux interface measurement
Pathway	Methane pathway measured
Reference	Author name and year published
Source	Source of data
Full citation	Full citation
Lagoon	Description
No	Sample No
Name	Site name
Country	Country
Ecosystem_type	Ecosystem type defined for this study (Text S1)
Methaneflux_mgCH4m2d1	Daily methane flux (mg CH4 m-2 d-1)
Lat	Latitude
Lon	Longitude
Interface	Methane interface measured
Pathway	Methane pathway measured
Reference	Author name and year published
Source	Source of data
Comment	Additional comment
Full citation	Full citation
Fjord	Description
No	Sample No
Name	Site name
Country	Country
Ecosystem_type	Ecosystem type defined for this study (Text S1)
Methaneflux_mgCH4m2d1	Daily methane flux (mg CH4 m-2 d-1)
Lat	Latitude
Lon	Longitude
Interface	Methane interface measured
Oxygen_level	Oxygen level of the water column
Comment	Additional comment
Reference	Author name and year published
Source	Source of data
Full ref	Full reference
Nearshore	Description
No	Sample No
Name	Site name
Ecosystem_type	Ecosystem type defined for this study (Text S1)
Site_description	Site description provided by source
Exclude	Exclusion of data for analysis
Methaneflux_mgCH4m2d1	Daily methane flux (mg CH4 m-2 d-1)
Lat	Latitude
Lon	Longitude
Depth	Water depth of the site (m)
Pathway	Methane pathway measured
Reference	Author name and year published
Source	Source of data
Comment	Additional comment
Full citation	Full citation
Continential shelf	Description
No	Sample No
Name	Site name
Ecosystem_type	Ecosystem type defined for this study (Text S1)
Site_description	Site description
Exclude	Exclusion of data for analysis
Methaneflux_mgCH4m2d1	Daily methane flux (mg CH4 m-2 d-1)
Lat	Latitude
Lon	Longitude
Depth	Water depth of the site (m)
Pathway	Methane pathway measured
Reference	Author name and year published
Source	Source of data
Full citation	Full citation

## Sheet: small lake and pond
No	Name	Country	Ecosystem_type	Methaneflux_mgCH4m2d1	Methaneflux_gch4m2yr1	Aggregrated_flux	Lat	Lon	DiffCH4_Flux	EbCH4_Flux	Area_km2	Depth	Pathway	Exclude	Estimated_icefree_days	Lake_type	Catchment_landcover	Trophic_level	Reference	Source	Full ref
1	1.1,Sweden	Sweden	Small lake and Pond	393.75	84.4594	1	68.35	18.9695	55.61	338.14	2.9e-05	0.21	DE		150	PP/T			Kuhn et al. 2018	Kuhn et al., 2021	Kuhn, M., Lundin, E. J., Giesler, R., Johansson, M., & Karlsson, J. (2018). Emissions from thaw ponds largely offset the carbon sink of northern permafrost wetlands. Scientific Reports, 8, Article 9535.
2	1.5, Canada	Canada	Small lake and Pond	65	15.6351	1	53.38	-77.43	65		0.0028	0.75	D		187.2	PP			McEnroe et al. 2009	Johnson et al 2022	McEnroe, N. A., N. T. Roulet, T. R. Moore, and M. Garneau (2009), Do pool surface area and depth control CO2 and CH4 fluxes from an ombrotrophic raised bog, James Bay, Canada, J. Geophys. Res., 114, G01001
3	11.12, Canada	Canada	Small lake and Pond	230	55.3242	1	53.38	-77.43	230		0.0003	0.35	D		187.2	PP			McEnroe et al. 2009	Johnson et al 2022	McEnroe, N. A., N. T. Roulet, T. R. Moore, and M. Garneau (2009), Do pool surface area and depth control CO2 and CH4 fluxes from an ombrotrophic raised bog, James Bay, Canada, J. Geophys. Res., 114, G01001
4	13, Sweden	Sweden	Small lake and Pond	12.0055	2.63233	1	68	18	12.0055		0.00014	0.33	D		156.8	GP			Karlsson et al. 2013	Johnson et al 2022	Karlsson, J., Giesler, R., Persson, J., & Lundin, E. (2013). High emission of carbon dioxide and methane during ice thaw in high latitude lakes. Journal of Geophysical Research: Biogeosciences, 118(3), 1123–1127.
5	13.1,Sweden	Sweden	Small lake and Pond	271.96	58.3354	1	68.36	19.0526	13.3	258.66		0.33	DE		150	PP			Kuhn et al. 2018	Kuhn et al., 2021	Kuhn, M., Lundin, E. J., Giesler, R., Johansson, M., & Karlsson, J. (2018). Emissions from thaw ponds largely offset the carbon sink of northern permafrost wetlands. Scientific Reports, 8, Article 9535.
6	14, Canada	Canada	Small lake and Pond	40	9.6216	1	53.38	-77.43	40		3.45e-05	0.48	D		187.2	PP			McEnroe et al. 2009	Johnson et al 2022	McEnroe, N. A., N. T. Roulet, T. R. Moore, and M. Garneau (2009), Do pool surface area and depth control CO2 and CH4 fluxes from an ombrotrophic raised bog, James Bay, Canada, J. Geophys. Res., 114, G01001
7	14, Sweden	Sweden	Small lake and Pond	8.8564	1.94185	1	68	18	8.8564		3.45e-05	0.48	D		156.8	GP			Karlsson et al. 2013	Johnson et al 2022	Karlsson, J., Giesler, R., Persson, J., & Lundin, E. (2013). High emission of carbon dioxide and methane during ice thaw in high latitude lakes. Journal of Geophysical Research: Biogeosciences, 118(3), 1123–1127.
8	15.1,Sweden	Sweden	Small lake and Pond	207.25	44.4551	1	68.36	19.0534	116.99	90.26		1.25	DE		150	PP			Kuhn et al. 2018	Kuhn et al., 2021	Kuhn, M., Lundin, E. J., Giesler, R., Johansson, M., & Karlsson, J. (2018). Emissions from thaw ponds largely offset the carbon sink of northern permafrost wetlands. Scientific Reports, 8, Article 9535.
9	16.1,Sweden	Sweden	Small lake and Pond	181	38.8245	1	68.35	19.0491	9.56	171.44	1e-05	0.52	DE		150	PP			Kuhn et al. 2018	Kuhn et al., 2021	Kuhn, M., Lundin, E. J., Giesler, R., Johansson, M., & Karlsson, J. (2018). Emissions from thaw ponds largely offset the carbon sink of northern permafrost wetlands. Scientific Reports, 8, Article 9535.
10	17.1,Sweden	Sweden	Small lake and Pond	644.56	138.258	1	68.35	19.0487	94.76	549.8	1e-05	0.44	DE		150	PP			Kuhn et al. 2018	Kuhn et al., 2021	Kuhn, M., Lundin, E. J., Giesler, R., Johansson, M., & Karlsson, J. (2018). Emissions from thaw ponds largely offset the carbon sink of northern permafrost wetlands. Scientific Reports, 8, Article 9535.
11	18.1,Sweden	Sweden	Small lake and Pond	239.86	51.45	1	68.35	19.0471	113.85	126.01	1e-05	0.27	DE		150	PP			Kuhn et al. 2018	Kuhn et al., 2021	Kuhn, M., Lundin, E. J., Giesler, R., Johansson, M., & Karlsson, J. (2018). Emissions from thaw ponds largely offset the carbon sink of northern permafrost wetlands. Scientific Reports, 8, Article 9535.
12	2, Sweden	Sweden	Small lake and Pond	63.7663	13.9814	1	68	18	63.7663		6.08e-06	0.16	D		156.8	GP			Karlsson et al. 2013	Johnson et al 2022	Karlsson, J., Giesler, R., Persson, J., & Lundin, E. (2013). High emission of carbon dioxide and methane during ice thaw in high latitude lakes. Journal of Geophysical Research: Biogeosciences, 118(3), 1123–1127.
13	2.1,Sweden	Sweden	Small lake and Pond	200.11	42.9236	1	68.35	18.9696	160.72	39.39	6e-06	0.16	DE		150	PP			Kuhn et al. 2018	Kuhn et al., 2021	Kuhn, M., Lundin, E. J., Giesler, R., Johansson, M., & Karlsson, J. (2018). Emissions from thaw ponds largely offset the carbon sink of northern permafrost wetlands. Scientific Reports, 8, Article 9535.
14	2.6, Canada	Canada	Small lake and Pond	57.5	13.831	1	53.38	-77.43	57.5		0.0024	0.7	D		187.2	PP			McEnroe et al. 2009	Johnson et al 2022	McEnroe, N. A., N. T. Roulet, T. R. Moore, and M. Garneau (2009), Do pool surface area and depth control CO2 and CH4 fluxes from an ombrotrophic raised bog, James Bay, Canada, J. Geophys. Res., 114, G01001
15	20, Sweden	Sweden	Small lake and Pond	3.4442	0.755175	1	68	18	3.4442		3.03e-05	0.37	D		156.8	GP			Karlsson et al. 2013	Johnson et al 2022	Karlsson, J., Giesler, R., Persson, J., & Lundin, E. (2013). High emission of carbon dioxide and methane during ice thaw in high latitude lakes. Journal of Geophysical Research: Biogeosciences, 118(3), 1123–1127.
16	20.1,Sweden	Sweden	Small lake and Pond	92.19	19.7748	1	68.35	19.0474	50.54	41.65	3e-05	0.37	DE		150	PP			Kuhn et al. 2018	Kuhn et al., 2021	Kuhn, M., Lundin, E. J., Giesler, R., Johansson, M., & Karlsson, J. (2018). Emissions from thaw ponds largely offset the carbon sink of northern permafrost wetlands. Scientific Reports, 8, Article 9535.
17	24, Sweden	Sweden	Small lake and Pond	6.1012	1.33775	1	68	18	6.1012		0.02		D		156.8	GP			Karlsson et al. 2013	Johnson et al 2022	Karlsson, J., Giesler, R., Persson, J., & Lundin, E. (2013). High emission of carbon dioxide and methane during ice thaw in high latitude lakes. Journal of Geophysical Research: Biogeosciences, 118(3), 1123–1127.
18	3, Canada	Canada	Small lake and Pond	65	15.6351	1	53.38	-77.43	65		2.03e-05	0.21	D		187.2	PP			McEnroe et al. 2009	Johnson et al 2022	McEnroe, N. A., N. T. Roulet, T. R. Moore, and M. Garneau (2009), Do pool surface area and depth control CO2 and CH4 fluxes from an ombrotrophic raised bog, James Bay, Canada, J. Geophys. Res., 114, G01001
19	3, Sweden	Sweden	Small lake and Pond	5.9043	1.29458	1	68	18	5.9043		2.03e-05	0.21	D		156.8	GP			Karlsson et al. 2013	Johnson et al 2022	Karlsson, J., Giesler, R., Persson, J., & Lundin, E. (2013). High emission of carbon dioxide and methane during ice thaw in high latitude lakes. Journal of Geophysical Research: Biogeosciences, 118(3), 1123–1127.
20	3.1,Sweden	Sweden	Small lake and Pond	147.73	31.6881	1	68.35	18.9695	28.93	118.8	2e-05	0.21	DE		150	PP			Kuhn et al. 2018	Kuhn et al., 2021	Kuhn, M., Lundin, E. J., Giesler, R., Johansson, M., & Karlsson, J. (2018). Emissions from thaw ponds largely offset the carbon sink of northern permafrost wetlands. Scientific Reports, 8, Article 9535.
21	4, Canada	Canada	Small lake and Pond	120	28.8648	1	53.38	-77.43	120		4e-05	0.66	D		187.2	PP			McEnroe et al. 2009	Johnson et al 2022	McEnroe, N. A., N. T. Roulet, T. R. Moore, and M. Garneau (2009), Do pool surface area and depth control CO2 and CH4 fluxes from an ombrotrophic raised bog, James Bay, Canada, J. Geophys. Res., 114, G01001
22	4, Sweden	Sweden	Small lake and Pond	8.4626	1.85551	1	68	18	8.4626		4e-05	0.66	D		156.8	GP			Karlsson et al. 2013	Johnson et al 2022	Karlsson, J., Giesler, R., Persson, J., & Lundin, E. (2013). High emission of carbon dioxide and methane during ice thaw in high latitude lakes. Journal of Geophysical Research: Biogeosciences, 118(3), 1123–1127.
23	4.1,Sweden	Sweden	Small lake and Pond	257.53	55.2402	1	68.35	18.9683	257.53		4e-05	0.66	D		150	PP			Kuhn et al. 2018	Kuhn et al., 2021	Kuhn, M., Lundin, E. J., Giesler, R., Johansson, M., & Karlsson, J. (2018). Emissions from thaw ponds largely offset the carbon sink of northern permafrost wetlands. Scientific Reports, 8, Article 9535.
24	5.1,Sweden	Sweden	Small lake and Pond	342.53	73.4727	1	68.35	18.9684	342.53		3.5e-05	0.42	D		150	PP			Kuhn et al. 2018	Kuhn et al., 2021	Kuhn, M., Lundin, E. J., Giesler, R., Johansson, M., & Karlsson, J. (2018). Emissions from thaw ponds largely offset the carbon sink of northern permafrost wetlands. Scientific Reports, 8, Article 9535.
25	6.1,Sweden	Sweden	Small lake and Pond	462.92	99.2963	1	68.35	18.9696	68.35	394.57	4.1e-05	0.79	DE		150	PP			Kuhn et al. 2018	Kuhn et al., 2021	Kuhn, M., Lundin, E. J., Giesler, R., Johansson, M., & Karlsson, J. (2018). Emissions from thaw ponds largely offset the carbon sink of northern permafrost wetlands. Scientific Reports, 8, Article 9535.
26	7, Sweden	Sweden	Small lake and Pond	10.4307	2.28704	1	68	18	10.4307		0.07		D		156.8	GP			Karlsson et al. 2013	Johnson et al 2022	Karlsson, J., Giesler, R., Persson, J., & Lundin, E. (2013). High emission of carbon dioxide and methane during ice thaw in high latitude lakes. Journal of Geophysical Research: Biogeosciences, 118(3), 1123–1127.
27	7.13, Canada	Canada	Small lake and Pond	175	42.0945	1	53.38	-77.43	175		0.004	0.55	D		187.2	PP			McEnroe et al. 2009	Johnson et al 2022	McEnroe, N. A., N. T. Roulet, T. R. Moore, and M. Garneau (2009), Do pool surface area and depth control CO2 and CH4 fluxes from an ombrotrophic raised bog, James Bay, Canada, J. Geophys. Res., 114, G01001
28	8, Sweden	Sweden	Small lake and Pond	4.1331	0.906224	1	68	18	4.1331		0.037		D		156.8	GP			Karlsson et al. 2013	Johnson et al 2022	Karlsson, J., Giesler, R., Persson, J., & Lundin, E. (2013). High emission of carbon dioxide and methane during ice thaw in high latitude lakes. Journal of Geophysical Research: Biogeosciences, 118(3), 1123–1127.
29	8.15, Canada	Canada	Small lake and Pond	157.5	37.885	1	53.38	-77.43	157.5		0.0003	0.3	D		187.2	PP			McEnroe et al. 2009	Johnson et al 2022	McEnroe, N. A., N. T. Roulet, T. R. Moore, and M. Garneau (2009), Do pool surface area and depth control CO2 and CH4 fluxes from an ombrotrophic raised bog, James Bay, Canada, J. Geophys. Res., 114, G01001
30	9 ponds Uppland, Sweden	Sweden	Small lake and Pond	35.1756	8.99791	9	60.109	17.676	35.1756				D		209	T			Peacock et al 2021	this study	Peacock, M., Granath, G., Wallin, M. B., Högbom, L., & Futter, M. N. (2021). Significant emissions from forest drainage ditches—An unaccounted term in anthropogenic greenhouse gas inventories? Journal of Geophysical Research: Biogeosciences, 126(10), e2021JG006478.
31	9, Sweden	Sweden	Small lake and Pond	4.2313	0.927755	1	68	18	4.2313		0.056		D		156.8	GP			Karlsson et al. 2013	Johnson et al 2022	Karlsson, J., Giesler, R., Persson, J., & Lundin, E. (2013). High emission of carbon dioxide and methane during ice thaw in high latitude lakes. Journal of Geophysical Research: Biogeosciences, 118(3), 1123–1127.
32	9,10,16, Canada	Canada	Small lake and Pond	51.6667	12.4279	1	53.38	-77.43	51.6667		0.0011	0.45	D		187.2	PP			McEnroe et al. 2009	Johnson et al 2022	McEnroe, N. A., N. T. Roulet, T. R. Moore, and M. Garneau (2009), Do pool surface area and depth control CO2 and CH4 fluxes from an ombrotrophic raised bog, James Bay, Canada?, J. Geophys. Res., 114, G01001
33	91 Lake, United States of America	United States of America	Small lake and Pond	29.23	6.85093	1	63.85	-148.97	17.692	11.538	0.066	0.5	DE		178.4	GP			Sepulveda-Jauregui et al. 2015	Johnson et al 2022	Sepulveda-Jauregui A, Walter Anthony KM, Martinez-Cruz K et al. (2015) Methane and carbon dioxide emissions from 40 lakes along a north-south latitudinal transect in Alaska. Biogeosciences, 12, 3197-3223
34	A,Sweden	Sweden	Small lake and Pond	0	0	1	68.35	19.033		0	0.00011	0.22	E	Yes	150	PP			Burke et al. 2019	Kuhn et al., 2021	https://doi.org/10.1029/2018JG004786
35	Aby, Ivory Coast	Ivory Coast	Small lake and Pond	6.6336	2.42126	2	5.164	-2.965	6.6336				D		365	TR			Koné et al., 2008; Koné et al., 2010	Johnson et al 2022	Koné, Y. J.-M. (2008). Dynamics of carbon dioxide and methane in the mangroves of Vietnam, and the rivers and the lagoons of Ivory Coast Dynamique du dioxyde de carbone et du méthane dans les mangroves du Vietnam, les rivières et les lagunes de la Côte d’Ivoire. Ph.D. thesis.;Koné, Y. J.-M., Abril, G., Delille, B., & Borges, A. V. (2010). Seasonal variability of methane in the rivers and lagoons …
36	Ace, United States of America	United States of America	Small lake and Pond	93.2685	NA	1	64.86	-147.94		93.2685	0.0626		E	Yes	NA	TH			Engram et al. 2020; Sepulveda-Jauregui et al. 2015	Kuhn et al., 2021; Johnson et al 2022	https://doi.org/10.1038/s41558-020-0762-8; Sepulveda-Jauregui, A., Walter Anthony, K. M., Martinez-Cruz, K., Greene, S., & Thalasso, F. (2015). Methane and carbon dioxide emissions from 40 lakes along a north-south latitudinal transect in Alaska. Biogeosciences, 12(11), 3197–3223
37	Alas Pond, Russia	Russia	Small lake and Pond	182.05	33.9778	1	62.135	129.8	182.05		0.006	1.5	D		110.2	TH			Desyatkin et al. 2009; Takakai et al. 2008	Kuhn et al., 2021; Johnson et al 2022	Desyatkin, A., Takakai, F., Fedorov, P.P., Nikolaeva, M.C., Desyatkin, R.V., Hatano, R. (2009) CH4 emission from different stages of thermokarst formation in Central Yakutia, East Siberia. Soil Science. Plant Nutrition. 55, 4, 558-570
307	Lövtjärn/S7, Sweden	Sweden	Small lake and Pond	3.9784	1.11793	1	59.913	15.406	3.9784		0.085		D		245	GP			Bastviken et al., 2004	Johnson et al 2022	Bastviken, D., Cole, J., Pace, M., and Tranvik, L.: Methane emissions from lakes: Dependence of lake characteristics, two regional assessments, and a global estimate, Global Biogeochem. Cy., 18, 1–12
39	Arrow Lake, United States of America	United States of America	Small lake and Pond	1.3426	0.490049	1	27.729	-82.678	1.3426				D		365	T			Barber et al., 1988	Johnson et al 2022	Barber, T. R., Burke, R. A., & Sackett, W. M. (1988). Diffusive flux of methane from warm wetlands. Global Biogeochemical Cycles, 2, 411–425.
40	Augustine Zoli, United States of America	United States of America	Small lake and Pond	132.692	22.4993	1	67.14	-150.65	43.269	89.423	0.069	3	DE		85.8	GP			Sepulveda-Jauregui et al. 2015	Johnson et al 2022	Sepulveda-Jauregui A, Walter Anthony KM, Martinez-Cruz K et al. (2015) Methane and carbon dioxide emissions from 40 lakes along a north-south latitudinal transect in Alaska. Biogeosciences, 12, 3197-3223
41	Autumn, United States of America	United States of America	Small lake and Pond	75.961	12.8799	1	68.46	-149.39	9.615	66.346	0.057	7.5	DE		85.8	GP			Sepulveda-Jauregui et al. 2015	Johnson et al 2022	Sepulveda-Jauregui A, Walter Anthony KM, Martinez-Cruz K et al. (2015) Methane and carbon dioxide emissions from 40 lakes along a north-south latitudinal transect in Alaska. Biogeosciences, 12, 3197-3223
42	B,Sweden	Sweden	Small lake and Pond	3.895	0.835477	1	68.355	19.0415	7.79	0	3.2e-05	0.18	DE		150	PP			Burke et al. 2019; Kuhn et al. 2018	Kuhn et al., 2021	Burke, S. A., Wik, M., Lang, A., Contosta, A. R., Palace, M., Crill, P. M., & Varner, R. K. (2019). Long-term measurements of methane ebullition from thaw ponds. Journal of Geophysical Research: Biogeosciences, 124(14), 4102–4117.; Kuhn, M., Lundin, E. J., Giesler, R., Johansson, M., & Karlsson, J. (2018). Emissions from thaw ponds largely offset the carbon sink of northern permafrost wetlands. S…
43	B-O, Canada	Canada	Small lake and Pond	20.6	5.76553	1	45.067	-78.75	20.6				D		243.4	T	wetland		Roulet et al., 1992	Johnson et al 2022	Roulet, N. T., Crill, P. M., Comer, N. T., Dove, A., & Zepp, R. G. (1992). Low boreal wetlands as a source of atmospheric methane. Journal of Geophysical Research, 97(D4), 3739–3749.
44	B-T, Canada	Canada	Small lake and Pond	5.8	1.6233	1	45.067	-78.75	5.8				D		243.4	T	wetland		Roulet et al., 1992	Johnson et al 2022	Roulet, N. T., Crill, P. M., Comer, N. T., Dove, A., & Zepp, R. G. (1992). Low boreal wetlands as a source of atmospheric methane. Journal of Geophysical Research, 97(D4), 3739–3749.
423	Rågåstjärn/S7, Sweden	Sweden	Small lake and Pond	7.1982	2.02269	1	59.915	15.464	7.1982		0.04		D		245	GP			Bastviken et al., 2004	Johnson et al 2022	Bastviken, D., Cole, J., Pace, M., and Tranvik, L.: Methane emissions from lakes: Dependence of lake characteristics, two regional assessments, and a global estimate, Global Biogeochem. Cy., 18, 1–12
46	BON,Canada	Canada	Small lake and Pond	24.27	5.55249	2	59.42	-77.33	24	0.27	0.0005	1.7	DE		170.4	PP/T		Oligotrophic	Matveev et al. 2016	Kuhn et al., 2021	https://doi.org/10.1002/lno.10311
47	BP1, Canada	Canada	Small lake and Pond	90.6	25.3571	1	45.067	-78.75	90.6				D		243.4	T	wetland		Roulet et al., 1992	Johnson et al 2022	Roulet, N. T., Crill, P. M., Comer, N. T., Dove, A., & Zepp, R. G. (1992). Low boreal wetlands as a source of atmospheric methane. Journal of Geophysical Research, 97(D4), 3739–3749.
48	BP2, Canada	Canada	Small lake and Pond	29.7	8.31244	1	45.067	-78.75	29.7				D		243.4	T	wetland		Roulet et al., 1992	Johnson et al 2022	Roulet, N. T., Crill, P. M., Comer, N. T., Dove, A., & Zepp, R. G. (1992). Low boreal wetlands as a source of atmospheric methane. Journal of Geophysical Research, 97(D4), 3739–3749.
49	BP3, Canada	Canada	Small lake and Pond	47.4	13.2663	1	45.067	-78.75	47.4				D		243.4	T	wetland		Roulet et al., 1992	Johnson et al 2022	Roulet, N. T., Crill, P. M., Comer, N. T., Dove, A., & Zepp, R. G. (1992). Low boreal wetlands as a source of atmospheric methane. Journal of Geophysical Research, 97(D4), 3739–3749.
50	BYL1, Canada	Canada	Small lake and Pond	3.3504	0.556836	2	73.12	-79.7735	3.3504				D		81	B			Laurion et al. 2010; Negandhi et al., 2013	Johnson et al 2022	Laurion, I., Vincent, W. F., MacIntyre, S., Retamal, L., Dupont, C., Francus, P., & Pienitz, R. (2010). Variability in greenhouse gas emissions from permafrost thaw ponds. Limnology and Oceanography, 55(1), 115-133.
51	BYL22, Canada	Canada	Small lake and Pond	3.2	0.53184	1	73.09	-79.58	3.2				D		81	TH			Laurion et al. 2010	Johnson et al 2022	Laurion, I., Vincent, W. F., MacIntyre, S., Retamal, L., Dupont, C., Francus, P., & Pienitz, R. (2010). Variability in greenhouse gas emissions from permafrost thaw ponds. Limnology and Oceanography, 55(1), 115-133.
52	BYL23, Canada	Canada	Small lake and Pond	37.4	6.21588	1	73.09	-79.58	37.4				D		81	TH			Laurion et al. 2010	Johnson et al 2022	Laurion, I., Vincent, W. F., MacIntyre, S., Retamal, L., Dupont, C., Francus, P., & Pienitz, R. (2010). Variability in greenhouse gas emissions from permafrost thaw ponds. Limnology and Oceanography, 55(1), 115-133.
53	BYL24, Canada	Canada	Small lake and Pond	8.11	1.34788	2	73.12	-79.7735	8.11				D		81	B			Bouchard et al., 2015; Laurion et al. 2010	Johnson et al 2022	Bouchard, F., Laurion, I., Preskienis, V., Fortier, D., Xu, X., & Whiticar, M. J. (2015). Modern to millennium-old greenhouse gases emitted from ponds and lakes of the eastern Canadian Arctic (Bylot Island, Nunavut). Biogeosciences, 12(23), 7279–7298.; Laurion, I., Vincent, W. F., MacIntyre, S., Retamal, L., Dupont, C., Francus, P., & Pienitz, R. (2010). Variability in greenhouse gas emissions fr…
54	BYL25, Canada	Canada	Small lake and Pond	5.6	0.93072	1	73.09	-79.58	5.6				D		81	TH			Laurion et al. 2010	Johnson et al 2022	Laurion, I., Vincent, W. F., MacIntyre, S., Retamal, L., Dupont, C., Francus, P., & Pienitz, R. (2010). Variability in greenhouse gas emissions from permafrost thaw ponds. Limnology and Oceanography, 55(1), 115-133.
55	BYL26, Canada	Canada	Small lake and Pond	1.9	0.31578	1	73.09	-79.58	1.9				D		81	TH			Laurion et al. 2010	Johnson et al 2022	Laurion, I., Vincent, W. F., MacIntyre, S., Retamal, L., Dupont, C., Francus, P., & Pienitz, R. (2010). Variability in greenhouse gas emissions from permafrost thaw ponds. Limnology and Oceanography, 55(1), 115-133.
56	BYL27, Canada	Canada	Small lake and Pond	53.29	8.8568	2	73.12	-79.7735	53.29				D		81	B			Bouchard et al., 2015; Laurion et al. 2010	Johnson et al 2022	Bouchard, F., Laurion, I., Preskienis, V., Fortier, D., Xu, X., & Whiticar, M. J. (2015). Modern to millennium-old greenhouse gases emitted from ponds and lakes of the eastern Canadian Arctic (Bylot Island, Nunavut). Biogeosciences, 12(23), 7279–7298.; Laurion, I., Vincent, W. F., MacIntyre, S., Retamal, L., Dupont, C., Francus, P., & Pienitz, R. (2010). Variability in greenhouse gas emissions fr…
57	BYL28, Canada	Canada	Small lake and Pond	60.5	10.0551	1	73.09	-79.58	60.5				D		81	TH			Laurion et al. 2010	Johnson et al 2022	Laurion, I., Vincent, W. F., MacIntyre, S., Retamal, L., Dupont, C., Francus, P., & Pienitz, R. (2010). Variability in greenhouse gas emissions from permafrost thaw ponds. Limnology and Oceanography, 55(1), 115-133.
58	BYL29, Canada	Canada	Small lake and Pond	2.2	0.36564	1	73.09	-79.58	2.2				D		81	TH			Laurion et al. 2010	Johnson et al 2022	Laurion, I., Vincent, W. F., MacIntyre, S., Retamal, L., Dupont, C., Francus, P., & Pienitz, R. (2010). Variability in greenhouse gas emissions from permafrost thaw ponds. Limnology and Oceanography, 55(1), 115-133.
59	BYL30, Canada	Canada	Small lake and Pond	11.31	1.87972	2	73.12	-79.7735	11.31				D		81	B			Bouchard et al., 2015; Laurion et al. 2010	Johnson et al 2022	Bouchard, F., Laurion, I., Preskienis, V., Fortier, D., Xu, X., & Whiticar, M. J. (2015). Modern to millennium-old greenhouse gases emitted from ponds and lakes of the eastern Canadian Arctic (Bylot Island, Nunavut). Biogeosciences, 12(23), 7279–7298.; Laurion, I., Vincent, W. F., MacIntyre, S., Retamal, L., Dupont, C., Francus, P., & Pienitz, R. (2010). Variability in greenhouse gas emissions fr…
60	BYL31, Canada	Canada	Small lake and Pond	10.7	1.77834	1	73.09	-79.58	10.7				D		81	TH			Laurion et al. 2010	Johnson et al 2022	Laurion, I., Vincent, W. F., MacIntyre, S., Retamal, L., Dupont, C., Francus, P., & Pienitz, R. (2010). Variability in greenhouse gas emissions from permafrost thaw ponds. Limnology and Oceanography, 55(1), 115-133.
61	BYL32, Canada	Canada	Small lake and Pond	14	2.3268	1	73.09	-79.58	14				D		81	TH			Laurion et al. 2010	Johnson et al 2022	Laurion, I., Vincent, W. F., MacIntyre, S., Retamal, L., Dupont, C., Francus, P., & Pienitz, R. (2010). Variability in greenhouse gas emissions from permafrost thaw ponds. Limnology and Oceanography, 55(1), 115-133.
62	BYL33, Canada	Canada	Small lake and Pond	21.2	3.52344	1	73.09	-79.58	21.2				D		81	TH			Laurion et al. 2010	Johnson et al 2022	Laurion, I., Vincent, W. F., MacIntyre, S., Retamal, L., Dupont, C., Francus, P., & Pienitz, R. (2010). Variability in greenhouse gas emissions from permafrost thaw ponds. Limnology and Oceanography, 55(1), 115-133.
63	BYL34, Canada	Canada	Small lake and Pond	2.7	0.44874	1	73.09	-79.58	2.7				D		81	TH			Laurion et al. 2010	Johnson et al 2022	Laurion, I., Vincent, W. F., MacIntyre, S., Retamal, L., Dupont, C., Francus, P., & Pienitz, R. (2010). Variability in greenhouse gas emissions from permafrost thaw ponds. Limnology and Oceanography, 55(1), 115-133.
64	BYL35, Canada	Canada	Small lake and Pond	8.3	1.37946	1	73.09	-79.58	8.3				D		81	TH			Laurion et al. 2010	Johnson et al 2022	Laurion, I., Vincent, W. F., MacIntyre, S., Retamal, L., Dupont, C., Francus, P., & Pienitz, R. (2010). Variability in greenhouse gas emissions from permafrost thaw ponds. Limnology and Oceanography, 55(1), 115-133.
65	BYL36, Canada	Canada	Small lake and Pond	0.89	0.147918	2	73.12	-79.7735	0.89			5.5	D		81	B			Bouchard et al., 2015; Laurion et al. 2010	Johnson et al 2022	Bouchard, F., Laurion, I., Preskienis, V., Fortier, D., Xu, X., & Whiticar, M. J. (2015). Modern to millennium-old greenhouse gases emitted from ponds and lakes of the eastern Canadian Arctic (Bylot Island, Nunavut). Biogeosciences, 12(23), 7279–7298.; Laurion, I., Vincent, W. F., MacIntyre, S., Retamal, L., Dupont, C., Francus, P., & Pienitz, R. (2010). Variability in greenhouse gas emissions fr…
66	BYL37, Canada	Canada	Small lake and Pond	0.2	0.03324	1	73.09	-79.58	0.2			3.2	D		81	TH			Laurion et al. 2010	Johnson et al 2022	Laurion, I., Vincent, W. F., MacIntyre, S., Retamal, L., Dupont, C., Francus, P., & Pienitz, R. (2010). Variability in greenhouse gas emissions from permafrost thaw ponds. Limnology and Oceanography, 55(1), 115-133.
67	BYL39, Canada	Canada	Small lake and Pond	0.2	0.03324	1	73.09	-79.58	0.2			4.3	D		81	TH			Laurion et al. 2010	Johnson et al 2022	Laurion, I., Vincent, W. F., MacIntyre, S., Retamal, L., Dupont, C., Francus, P., & Pienitz, R. (2010). Variability in greenhouse gas emissions from permafrost thaw ponds. Limnology and Oceanography, 55(1), 115-133.
68	BYL40, Canada	Canada	Small lake and Pond	0.5	0.0831	1	73.09	-79.58	0.5			6.7	D		81	TH			Laurion et al. 2010	Johnson et al 2022	Laurion, I., Vincent, W. F., MacIntyre, S., Retamal, L., Dupont, C., Francus, P., & Pienitz, R. (2010). Variability in greenhouse gas emissions from permafrost thaw ponds. Limnology and Oceanography, 55(1), 115-133.
69	BYL41, Canada	Canada	Small lake and Pond	1.3	0.21606	1	73.09	-79.58	1.3				D		81	TH			Laurion et al. 2010	Johnson et al 2022	Laurion, I., Vincent, W. F., MacIntyre, S., Retamal, L., Dupont, C., Francus, P., & Pienitz, R. (2010). Variability in greenhouse gas emissions from permafrost thaw ponds. Limnology and Oceanography, 55(1), 115-133.
70	BYL42, Canada	Canada	Small lake and Pond	0.8	0.13296	1	73.09	-79.58	0.8				D		81	TH			Laurion et al. 2010	Johnson et al 2022	Laurion, I., Vincent, W. F., MacIntyre, S., Retamal, L., Dupont, C., Francus, P., & Pienitz, R. (2010). Variability in greenhouse gas emissions from permafrost thaw ponds. Limnology and Oceanography, 55(1), 115-133.
441	Skottjärn, Sweden	Sweden	Small lake and Pond	6.6268	1.71091	2	59.942	15.3975	6.6268		0.028		D		212.4	T			Bastviken et al., 2004; Van Hardenbroek et al., 2012	Johnson et al 2022	Bastviken, D., Cole, J., Pace, M., and Tranvik, L.: Methane emissions from lakes: Dependence of lake characteristics, two regional assessments, and a global estimate, Global Biogeochem. Cy., 18, 1–12; van Hardenbroek, M., Lotter, A. F., Bastviken, D., Duc, N. T., & Heiri, O. (2012). Relationship between δ13C of chironomid remains and methane flux in Swedish lakes. Freshwater Biology, 57, 166–177.
72	BYL80, Canada	Canada	Small lake and Pond	4.8796	0.81099	2	73.15	-79.967	4.8796		0.01	1	D		81	B			Bouchard et al., 2015; Negandhi et al., 2013	Johnson et al 2022	Bouchard, F., Laurion, I., Preskienis, V., Fortier, D., Xu, X., & Whiticar, M. J. (2015). Modern to millennium-old greenhouse gases emitted from ponds and lakes of the eastern Canadian Arctic (Bylot Island, Nunavut). Biogeosciences, 12(23), 7279–7298.; Negandhi, K., Laurion, I., Whiticar, M. J., Galand, P. E., Xu, X., & Lovejoy, C. (2013). Small thaw ponds: An unaccounted source of methane in the…
73	Babochka,Russia	Russia	Small lake and Pond	2.4	0.503376	1	60.9	69.65	2.4	0	0.0177	2.2	DE		143.2	PP			Sabrekov et al. 2017	Kuhn et al., 2021	https://doi.org/10.5194/bg-14-3715-2017
74	Bakchar-bog-1,Russia	Russia	Small lake and Pond	324.53	75.7453	1	56.8	82.75	213.6	110.93	0.0005	0.9	DE		177	PP			Sabrekov et al. 2017	Kuhn et al., 2021	https://doi.org/10.5194/bg-14-3715-2017
75	Bakchar-bog-2,Russia	Russia	Small lake and Pond	196.8	45.9331	1	56.8	82.75	196.8		0.002	2.2	D		177	PP			Sabrekov et al. 2017	Kuhn et al., 2021	https://doi.org/10.5194/bg-14-3715-2017
76	Bakchar-forest-1,Russia	Russia	Small lake and Pond	322.67	75.3112	1	56.8	82.75	177.6	145.07	0.0184	1.6	DE		177	PP			Sabrekov et al. 2017	Kuhn et al., 2021	https://doi.org/10.5194/bg-14-3715-2017
77	Bakchar-forest-2,Russia	Russia	Small lake and Pond	62.4	14.5642	1	56.8	82.75	62.4		0.0104	2.1	D		177	PP			Sabrekov et al. 2017	Kuhn et al., 2021	https://doi.org/10.5194/bg-14-3715-2017
78	Bakchar-forest-3,Russia	Russia	Small lake and Pond	197.07	45.9961	1	56.8	82.75	122.4	74.67	0.007	2.3	DE		177	PP			Sabrekov et al. 2017	Kuhn et al., 2021	https://doi.org/10.5194/bg-14-3715-2017
79	Bakchar-ryam,Russia	Russia	Small lake and Pond	76.8	17.9251	1	56.8	82.75	76.8		0.0045	1.4	D		177	PP			Sabrekov et al. 2017	Kuhn et al., 2021	https://doi.org/10.5194/bg-14-3715-2017
80	Beaver Creek, Canada	Canada	Small lake and Pond	115.692	31.3918	2	50.15	-66	73.7917	83.8		0.5	D		231.2	B			Ford and Naiman 1988	Johnson et al 2022	Ford, T. E., & Naiman, R. J. (1988). Alteration of carbon cycling by Beaver: Methane evasion rates from Boreal forest streams and rivers. Canadian Journal of Zoology, 66, 529–533.
81	Beaver Pond, Canada	Canada	Small lake and Pond	110.916	27.0679	3	55.6723	-98.0123	82.9824	83.8	0.05	2.3	DE		192.2	B			Dove et al., 1999; Kuhlbusch et al., 1999; Roulet et al., 1997	Johnson et al 2022	Dove, A., Roulet, N., Crill, P., Chanton, J., & Bourbonniere, R. (1999). Methane dynamics of a Northern Boreal Beaver Pond. Écoscience, 6(4), 577–586.; Roulet, N. T., Crill, P. M., Comer, N. T., Dove, A., & Zepp, R. G. (1997). CO2 and CH4 flux between a boreal beaver pond and the atmosphere. Journal of Geophysical Research, 102(29), 313–29319.
454	Svarttjärn, Sweden	Sweden	Small lake and Pond	8.64525	2.42932	2	59.8905	15.258	8.64525		0.007		D		245	T			Bastviken et al., 2004; Van Hardenbroek et al., 2012	Johnson et al 2022	Bastviken, D., Cole, J., Pace, M., and Tranvik, L.: Methane emissions from lakes: Dependence of lake characteristics, two regional assessments, and a global estimate, Global Biogeochem. Cy., 18, 1–12; van Hardenbroek, M., Lotter, A. F., Bastviken, D., Duc, N. T., & Heiri, O. (2012). Relationship between δ13C of chironomid remains and methane flux in Swedish lakes. Freshwater Biology, 57, 166–177.
161	Hummingbird, United States of America	United States of America	Small lake and Pond	4.7843	1.32028	3	44.8727	-89.444	2.27923	3.7576	0.3125	7.6	DE		237.8	T			Bastviken et al., 2004; West et al., 2016	Johnson et al 2022	Bastviken, D., Cole, J., Pace, M., and Tranvik, L.: Methane emissions from lakes: Dependence of lake characteristics, two regional assessments, and a global estimate, Global Biogeochem. Cy., 18, 1–12
84	Belem, Brazil	Brazil	Small lake and Pond	9.1102	3.32522	1	-18.991	-57.494	3.2113	5.8989			DE		365	TR			Bastviken et al., 2010	Johnson et al 2022	Bastviken, D., Tranvik, L. J., Downing, J. A., Crill, P. M., & Enrich-Prast, A. (2011). Freshwater methane emissions offset the continental carbon sink. Science, 331, 50–51. https://doi.org/10.1126/science.1196808
85	Biguás Lake, Brazil	Brazil	Small lake and Pond	370.652	135.288	1	-32.0786	-52.1675	225.451	145.202	0.015		DE		365	TR		Eutrophic	Palma-Silva et al. 2013	Rosentreter et al., 2021	Palma-Silva, C. et al. Methane emissions in two small shallow neotropical lakes: The role of temperature and trophic level. Atmospheric Environment 81, 373–379 (2013).
329	Morris, United States of America	United States of America	Small lake and Pond	28.0766	7.98385	3	43.4507	-89.244	5.37157	34.0575	0.3125	6.7	DE		249.8	T			Bastviken et al., 2004; West et al., 2016	Johnson et al 2022	Bastviken, D., Cole, J., Pace, M., and Tranvik, L.: Methane emissions from lakes: Dependence of lake characteristics, two regional assessments, and a global estimate, Global Biogeochem. Cy., 18, 1–12
87	Bondarevskoe,Russia	Russia	Small lake and Pond	14.4	3.02026	1	60.9	69.65	12	2.4	0.3915	3.7	DE		143.2	PP			Sabrekov et al. 2017	Kuhn et al., 2021	https://doi.org/10.5194/bg-14-3715-2017
88	Bracinho, Brazil	Brazil	Small lake and Pond	251.011	91.6189	1	-19.007	-57.551	28.9528	222.058			DE		365	TR			Bastviken et al., 2010	Johnson et al 2022	Bastviken, D., Tranvik, L. J., Downing, J. A., Crill, P. M., & Enrich-Prast, A. (2011). Freshwater methane emissions offset the continental carbon sink. Science, 331, 50–51. https://doi.org/10.1126/science.1196808
89	C,Sweden	Sweden	Small lake and Pond	4.5	0.96525	1	68.35	19.033		4.5	2.4e-05	0.35	E	Yes	150	PP			Burke et al. 2019	Kuhn et al., 2021	https://doi.org/10.1029/2018JG004786
90	CHAOS, United States of America	United States of America	Small lake and Pond	2	0.46876	1	60.46	-161.45	2				D		178.4	TH			Bartlett et al. 1992	Johnson et al 2022	Bartlett, K. B., Crill, P. M., Sass, R. L., Harriss, R. C., & Dise, N. B. (1992). Methane emissions from tundra environments in the Yukon-Kuskokwim delta, Alaska. Journal of Geophysical Research, 97, 16645–16660.
91	CPST P1, India	India	Small lake and Pond	45.28	16.5272	1	11.002	76.931	1.6	43.68			DE		365	TR			Selvam et al., 2014	Johnson et al 2022	Selvam BP, Natchimuthu S, Arunachalam L et al. (2014) Methane and carbon dioxide emissions from inland waters in India-implications for large scale greenhouse gas balances. Global Change Biology, 20, 3397-3407.
92	CTRT P1, India	India	Small lake and Pond	3.04	1.1096	1	10.976	76.821	1.28	1.76			DE		365	TR			Selvam et al., 2014	Johnson et al 2022	Selvam BP, Natchimuthu S, Arunachalam L et al. (2014) Methane and carbon dioxide emissions from inland waters in India-implications for large scale greenhouse gas balances. Global Change Biology, 20, 3397-3407.
93	Cakeater, United States of America	United States of America	Small lake and Pond	15.77	2.74682	1	71.279	-156.637		15.77	0.0892		D		92.4	GP			Engram et al. 2020	Kuhn et al., 2021	https://doi.org/10.1038/s41558-020-0762-8
94	Cano Dragado, Colombia	Colombia	Small lake and Pond	6.384	2.33016	1	10.929	-74.59	6.384				D		365	TR			Konnerup et al., 2014	Johnson et al 2022	Konnerup, D., Betancourt-Portela, J. M., Villamil, C., & Parra, J. P. (2014). Nitrous oxide and methane emissions from the restored mangrove ecosystem of the Ciénaga Grande de Santa Marta, Colombia. Estuarine, Coastal and Shelf Science, 140, 43–51. https://doi.org/10.1016/j.ecss.2014.01.006
95	Coastal Fen Ponds, Canada	Canada	Small lake and Pond	160	38.5984	1	51.28	-80.37	160		0.00047	0.31	D		188.2	PP			Hamilton et al. 1994	Johnson et al 2022	Hamilton, J. D., Kelly, C. A., Rudd, J. W. M., Hesslein, R. H., & Roulet, N. T. (1994). Flux to the atmosphere of CH4 and CO2 from wetland ponds on the Hudson Bay lowlands (HBLs). Journal of Geophysical Research, 99, 1495–1510.
372	Paul, United States of America	United States of America	Small lake and Pond	12.5586	3.325	4	45.2208	-89.4573	9.85698	3.6021	0.3125	12	DE		221.8	T			Bastviken et al., 2004; West et al., 2016	Johnson et al 2022	Bastviken, D., Cole, J., Pace, M., and Tranvik, L.: Methane emissions from lakes: Dependence of lake characteristics, two regional assessments, and a global estimate, Global Biogeochem. Cy., 18, 1–12
97	CockerGap, United States of America	United States of America	Small lake and Pond	71.67	NA	1	66.562	-164.451		71.67	0.0161	5.4	E	Yes	NA	T			Engram et al. 2020	Kuhn et al., 2021	https://doi.org/10.1038/s41558-020-0762-8
98	Cranberry, United States of America	United States of America	Small lake and Pond	56.18	15.5978	1	53.533	-118.57	0.32	112.04	0.00885	7.9	DE		240.2	T			Engram et al. 2020; West et al., 2016	Kuhn et al., 2021; Johnson et al 2022	https://doi.org/10.1038/s41558-020-0762-8
99	Crescent Lake, United States of America	United States of America	Small lake and Pond	3.3425	1.22001	1	27.671	-82.655	3.3425				D		365	T			Barber et al., 1988	Johnson et al 2022	Barber, T. R., Burke, R. A., & Sackett, W. M. (1988). Diffusive flux of methane from warm wetlands. Global Biogeochemical Cycles, 2, 411–425.
378	Peter, United States of America	United States of America	Small lake and Pond	5.50633	1.51953	3	44.8773	-89.442	5.50633	4.42275	0.3125	18	DE		237.8	T			Bastviken et al., 2004; West et al., 2016	Johnson et al 2022	Bastviken, D., Cole, J., Pace, M., and Tranvik, L.: Methane emissions from lakes: Dependence of lake characteristics, two regional assessments, and a global estimate, Global Biogeochem. Cy., 18, 1–12
101	D,Sweden	Sweden	Small lake and Pond	170.695	36.6141	1	68.355	19.0433	76.34	132.525	1.3e-05	0.41	DE		150	PP			Burke et al. 2019; Kuhn et al. 2018	Kuhn et al., 2021	Burke, S. A., Wik, M., Lang, A., Contosta, A. R., Palace, M., Crill, P. M., & Varner, R. K. (2019). Long-term measurements of methane ebullition from thaw ponds. Journal of Geophysical Research: Biogeosciences, 124(14), 4102–4117.; Kuhn, M., Lundin, E. J., Giesler, R., Johansson, M., & Karlsson, J. (2018). Emissions from thaw ponds largely offset the carbon sink of northern permafrost wetlands. S…
102	DHKO L1, India	India	Small lake and Pond	6.08	2.2192	1	12.122	77.912	0.8	5.28			DE		365	TR			Selvam et al., 2014	this study	Selvam BP, Natchimuthu S, Arunachalam L et al. (2014) Methane and carbon dioxide emissions from inland waters in India-implications for large scale greenhouse gas balances. Global Change Biology, 20, 3397-3407.
103	DHPE P1, India	India	Small lake and Pond	56.64	20.6736	1	12.126	77.912	4.8	51.84			DE		365	TR			Selvam et al., 2014	this study	Selvam BP, Natchimuthu S, Arunachalam L et al. (2014) Methane and carbon dioxide emissions from inland waters in India-implications for large scale greenhouse gas balances. Global Change Biology, 20, 3397-3407.
468	Tuesday, United States of America	United States of America	Small lake and Pond	9.27785	2.9344	2	44.19	-89.409	6.75435	5.047	0.3125	15	DE		295.4	T			Bastviken et al., 2004; West et al., 2016	Johnson et al 2022	Bastviken, D., Cole, J., Pace, M., and Tranvik, L.: Methane emissions from lakes: Dependence of lake characteristics, two regional assessments, and a global estimate, Global Biogeochem. Cy., 18, 1–12
478	Võrtsjärv, Latvia	Latvia	Small lake and Pond	33.456	NA	1	57	26.8		33.456	270	6	E	Yes	NA	NA			Beaulieu et al., 2016	Johnson et al 2022	Beaulieu, J. J., McManus, M. G., & Nietch, C. T. (2016). Estimates of reservoir methane emissions based on a spatially balanced probabilistic-survey. Limnology and Oceanography, 61, S27–S40.
71	BYL66, Canada	Canada	Small lake and Pond	1.44	0.239328	1	73.15	-79.967	1.44		0.11	5	D		81	B			Bouchard et al., 2015	Johnson et al 2022	Bouchard, F., Laurion, I., Preskienis, V., Fortier, D., Xu, X., & Whiticar, M. J. (2015). Modern to millennium-old greenhouse gases emitted from ponds and lakes of the eastern Canadian Arctic (Bylot Island, Nunavut). Biogeosciences, 12(23), 7279–7298.
488	Wylde Lake Bog, Canada	Canada	Small lake and Pond	84.6468	23.3117	1	43.92	-80.4					D		237	PP	Bog		Burger et al. 2016	Taillardat et al., 2024	Burger, M., Berger, S., Spangenberg, I., and Blodau, C.: Summer fluxes of methane and carbon dioxide from a pond and floating mat in a continental Canadian peatland, Biogeosciences, 13, 3777–3791, https://doi.org/10.5194/bg-13-3777-2016, 2016.
108	Diogo, Brazil	Brazil	Small lake and Pond	0.2808	0.102492	1	-22.314	-46.302	0.2808				D		365	TR			Ballester et al., 2001	Johnson et al 2022	Ballester, M. V. R., & Santos, J. E. (2001). Biogenic gases (CH4, CO2 and O2) distribution in a riverine wetland system. Oecologia Brasiliensis,9, 21–32.
109	Doughnut, United States of America	United States of America	Small lake and Pond	46.91	10.9948	-	64.8995	-147.909	20.53	73.29	0.035	3.8	DE		178.4	TH			Engram et al. 2020; Sepulveda-Jauregui et al. 2015	Kuhn et al., 2021; Johnson et al 2022	https://doi.org/10.1038/s41558-020-0762-8; Sepulveda-Jauregui, A., Walter Anthony, K. M., Martinez-Cruz, K., Greene, S., & Thalasso, F. (2015). Methane and carbon dioxide emissions from 40 lakes along a north-south latitudinal transect in Alaska. Biogeosciences, 12(11), 3197–3223
110	Dragon's Pond, United States of America	United States of America	Small lake and Pond	59.615	10.1083	1	68.76	-148.84	30.769	28.846		1.5	DE		85.8	GP			Sepulveda-Jauregui et al. 2015	Johnson et al 2022	Sepulveda-Jauregui A, Walter Anthony KM, Martinez-Cruz K et al. (2015) Methane and carbon dioxide emissions from 40 lakes along a north-south latitudinal transect in Alaska. Biogeosciences, 12, 3197-3223
111	Duece, United States of America	United States of America	Small lake and Pond	154.689	NA	1	64.862	-147.941		154.689	1e-05		E	Yes	NA	TH			Engram et al. 2020; Sepulveda-Jauregui et al. 2015	Kuhn et al., 2021; Johnson et al 2022	Sepulveda-Jauregui, A., Walter Anthony, K. M., Martinez-Cruz, K., Greene, S., & Thalasso, F. (2015). Methane and carbon dioxide emissions from 40 lakes along a north-south latitudinal transect in Alaska. Biogeosciences, 12(11), 3197–3223
112	Dyede,Russia	Russia	Small lake and Pond	139.6	26.0549	1	62.11	130.33	139.6			1.42	D		110.2	T			Desyatkin et al. 2009	Kuhn et al., 2021	https://doi.org/10.1111/j.1747-0765.2009.00389.x
113	E,Sweden	Sweden	Small lake and Pond	53.4	11.4543	1	68.35	19.033		53.4	8.3e-05	0.85	E	Yes	150	PP			Burke et al. 2019	Kuhn et al., 2021	https://doi.org/10.1029/2018JG004786
114	E1, United States of America	United States of America	Small lake and Pond	31.185	NA	1	68.503	-149.469		31.185	0.013005	6.4	E	Yes	NA	GP			Engram et al. 2020; Walter Anthony et al. 2010	Kuhn et al., 2021; Johnson et al 2022	https://doi.org/10.1038/s41558-020-0762-8; Walter Anthony, K. M., Vas, D. A., Brosius, L., Chapin, F. S., Zimov, S. A., & Zhuang, Q. (2010). Estimating methane emissions from northern lakes using ice-bubble surveys. Limnology and Oceanography: Methods, 8(11), 592–609.
115	E6, United States of America	United States of America	Small lake and Pond	54.565	NA	1	68.512	-149.407		54.565	0.013505	2.6	E	Yes	NA	GP			Engram et al. 2020; Walter Anthony et al. 2010	Kuhn et al., 2021; Johnson et al 2022	https://doi.org/10.1038/s41558-020-0762-8; Walter Anthony, K. M., Vas, D. A., Brosius, L., Chapin, F. S., Zimov, S. A., & Zhuang, Q. (2010). Estimating methane emissions from northern lakes using ice-bubble surveys. Limnology and Oceanography: Methods, 8(11), 592–609.
116	EVV Upper lake,Greenland	Greenland	Small lake and Pond	20.75	3.60842	1	67.08	-50.2872	9.47	11.28	0.0002	5.4	DE		92	GP			Thompson et al. 2016	Kuhn et al., 2021	https://doi.org/10.1007/s10533-016-0261-1
117	Ebrie, Ivory Coast	Ivory Coast	Small lake and Pond	4.576	1.67024	2	5.309	-3.962	4.576				D		365	TR			Koné et al., 2008; Koné et al., 2010	Johnson et al 2022	Koné, Y. J.-M. (2008). Dynamics of carbon dioxide and methane in the mangroves of Vietnam, and the rivers and the lagoons of Ivory Coast Dynamique du dioxyde de carbone et du méthane dans les mangroves du Vietnam, les rivières et les lagunes de la Côte d’Ivoire. Ph.D. thesis.;Koné, Y. J.-M., Abril, G., Delille, B., & Borges, A. V. (2010). Seasonal variability of methane in the rivers and lagoons …
494	shallow pool2009, Canada	Canada	Small lake and Pond	141.126	29.9159	4	54.12	-72.5					D		146.4	PP	oligotrophic patterned fen shallow pool		Clich��-Trudeau 2013 and 2014	Taillardat et al., 2024	Cliche Trudeau, N., Garneau, M., & Pelletier, L. (2013). Methane fluxes from a patterned fen of the northeastern part of the La Grande river watershed, James Bay, Canada. Biogeochemistry, 113(1–3), 409–422, Cliche Trudeau, N., Garneau, M., & Pelletier, L. (2014). Interannual variability in the CO2 balance of a boreal patterned fen, James Bay, Canada. Biogeochemistry, 118(1–3), 371–387
119	El Fuego, United States of America	United States of America	Small lake and Pond	98.077	NA	1	67.67	-149.72		98.077			E	Yes	NA	B			Sepulveda-Jauregui et al. 2015	Johnson et al 2022	Sepulveda-Jauregui A, Walter Anthony KM, Martinez-Cruz K et al. (2015) Methane and carbon dioxide emissions from 40 lakes along a north-south latitudinal transect in Alaska. Biogeosciences, 12, 3197-3223
120	Ennore Creek Lagoon, India	India	Small lake and Pond	120.5	43.9825	1	13.218	80.326	120.5				D		365	TR			Purvaja et al., 2001	Johnson et al 2022	Purvaja, R., & Ramesh, R. (2000). Human impacts on methane emission from mangrove ecosystems in India. Regional Environmental Change, 1(2), 86–97. https://doi.org/10.1007/PL00011537
406	Ponds, Canada	Canada	Small lake and Pond	140.8	41.3586	1	48.248	-71.436	67.2	73.6			DE		263.2	B			DelSontro et al., 2016	Johnson et al 2022	Del Sontro, T., Boutet, L., St-Pierre, A., del Giorgio, P. A., & Prairie, Y. T. (2016). Methane ebullition and diffusion from northern ponds and lakes regulated by the interaction between temperature and system productivity. Limnology and Oceanography, 61(S1), S62–S77.
122	Eugenia, United States of America	United States of America	Small lake and Pond	43.709	10.2445	1	65.83	-149.63	43.709				D		178.4	TH			Sepulveda-Jauregui et al. 2015	Johnson et al 2022	Sepulveda-Jauregui A, Walter Anthony KM, Martinez-Cruz K et al. (2015) Methane and carbon dioxide emissions from 40 lakes along a north-south latitudinal transect in Alaska. Biogeosciences, 12, 3197-3223
83	Beaver pond_Mer Bleue, Canada	Canada	Small lake and Pond	50.7428	14.1309	1	45.66	-75.5					D		241.4	PP	Bog		Dinsmore et al. 2009	Taillardat et al., 2024	Dinsmore, Kerry J.; Skiba, Ute M.; Billett, Michael F.; Rees, Robert M.. 2009 Effect of water table on greenhouse gas emissions from peatland mesocosms.Plant and Soil, 318 (1-2). 229-242. 10.1007/s11104-008-9832-9
445	St Lucia 1, Australia	Australia	Small lake and Pond	278.773	101.752	13	-27.5	153.016	278.773		0.022727		D		365			Eutrophic	Grinham et al 2018	this study; Rosentreter et al., 2021	Grinham, A., Albert, S., Deering, N., Dunbabin, M., Bastviken, D., Sherman, B., Lovelock, C. E., and Evans, C. D.: The importance of small artificial water bodies as sources of methane emissions in Queensland, Australia, Hydrol. Earth Syst. Sci., 22, 5281–5298, https://doi.org/10.5194/hess-22-5281-2018, 2018.
125	F,Sweden	Sweden	Small lake and Pond	40.9	8.77305	1	68.35	19.033		40.9	0.000135	0.43	E	Yes	150	PP			Burke et al. 2019	Kuhn et al., 2021	https://doi.org/10.1029/2018JG004786
126	F1,Canada	Canada	Small lake and Pond	14.0771	2.62538	1	67.4735	-134.69	7.51653	6.56057	0.058	1.2	DE		110	PP			Kuhn et al. unpublished	Kuhn et al., 2021	Kuhn, M. A., Varner, R. K., Bastviken, D., Crill, P., MacIntyre, S., Turetsky, M., Walter Anthony, K., McGuire, A. D., & Olefeldt, D. (2021). BAWLD-CH&lt;sub&gt;4&lt;/sub&gt;: A comprehensive dataset of methane fluxes from boreal and arctic ecosystems. Earth System Science Data, 13(11), 5151–5189. https://doi.org/10.5194/essd-13-5151-2021
127	F2,Canada	Canada	Small lake and Pond	5.05175	0.942152	1	67.451	-134.762	4.28115	0.770606	0.0095	2.5	DE		110	PP			Kuhn et al. unpublished	Kuhn et al., 2021	Kuhn, M. A., Varner, R. K., Bastviken, D., Crill, P., MacIntyre, S., Turetsky, M., Walter Anthony, K., McGuire, A. D., & Olefeldt, D. (2021). BAWLD-CH&lt;sub&gt;4&lt;/sub&gt;: A comprehensive dataset of methane fluxes from boreal and arctic ecosystems. Earth System Science Data, 13(11), 5151–5189. https://doi.org/10.5194/essd-13-5151-2021
128	F3,Canada	Canada	Small lake and Pond	62.3441	11.6272	1	67.4774	-134.705	61.874	0.470134	0.0055	5	DE		110	PP			Kuhn et al. unpublished	Kuhn et al., 2021	Kuhn, M. A., Varner, R. K., Bastviken, D., Crill, P., MacIntyre, S., Turetsky, M., Walter Anthony, K., McGuire, A. D., & Olefeldt, D. (2021). BAWLD-CH&lt;sub&gt;4&lt;/sub&gt;: A comprehensive dataset of methane fluxes from boreal and arctic ecosystems. Earth System Science Data, 13(11), 5151–5189. https://doi.org/10.5194/essd-13-5151-2021
129	F4,Canada	Canada	Small lake and Pond	6.59903	1.23072	1	67.3705	-134.856	5.5924	1.00663	0.02	1.5	DE		110	PP			Kuhn et al. unpublished	Kuhn et al., 2021	Kuhn, M. A., Varner, R. K., Bastviken, D., Crill, P., MacIntyre, S., Turetsky, M., Walter Anthony, K., McGuire, A. D., & Olefeldt, D. (2021). BAWLD-CH&lt;sub&gt;4&lt;/sub&gt;: A comprehensive dataset of methane fluxes from boreal and arctic ecosystems. Earth System Science Data, 13(11), 5151–5189. https://doi.org/10.5194/essd-13-5151-2021
130	F5,Canada	Canada	Small lake and Pond	8.39415	1.56551	1	67.3574	-134.83	6.14564	2.24851	0.089	2	DE		110	PP			Kuhn et al. unpublished	Kuhn et al., 2021	Kuhn, M. A., Varner, R. K., Bastviken, D., Crill, P., MacIntyre, S., Turetsky, M., Walter Anthony, K., McGuire, A. D., & Olefeldt, D. (2021). BAWLD-CH&lt;sub&gt;4&lt;/sub&gt;: A comprehensive dataset of methane fluxes from boreal and arctic ecosystems. Earth System Science Data, 13(11), 5151–5189. https://doi.org/10.5194/essd-13-5151-2021
172	Jänkäläisenlampi, Finland	Finland	Small lake and Pond	18.05	4.07641	6	67.1	27.4	18.05		0.01	3.2	D		166.2	PP			Huttunen et al. 2002	Johnson et al 2022	Huttunen, J. T., Väisänen, T. S., Heikkinen, M., Hellsten, S., Nykänen, H., Nenonen, O., & Martikainen, P. J. (2002). Exchange of CO2, CH4 and N2O between the atmosphere and two northern boreal ponds with catchments dominated by peatlands or forests. Plant and Soil, 242(1), 137–146.
132	Fig Tree Park, Australia	Australia	Small lake and Pond	710.181	259.216	1	-27.5394	152.968	710.181		0.008357		D		365	TR			Grinham et al 2018	Rosentreter et al., 2021	Grinham, A. et al. The importance of small artificial water bodies as sources of methane emissions in Queensland, Australia. Hydrology and Earth System Sciences Discussions 1–27 (2018). doi:10.5194/hess-2018-294
133	Flag, United States of America	United States of America	Small lake and Pond	2.35	NA	1	64.913	-147.857		2.35	0.0048	3.5	E	Yes	NA	T			Engram et al. 2020	Kuhn et al., 2021	https://doi.org/10.1038/s41558-020-0762-8
134	FoxDen, United States of America	United States of America	Small lake and Pond	77.73	NA	1	66.559	-164.456		77.73	0.0092	2.4	E	Yes	NA	T			Engram et al. 2020	Kuhn et al., 2021	https://doi.org/10.1038/s41558-020-0762-8
190	Kotsamolampi, Finland	Finland	Small lake and Pond	3.46	0.792548	1	68.05	27.06	3.46		0.01	1.8	D		170.8	GP			Huttunen et al. 2002	Johnson et al 2022	Huttunen, J. T., Väisänen, T. S., Heikkinen, M., Hellsten, S., Nykänen, H., Nenonen, O., & Martikainen, P. J. (2002). Exchange of CO2, CH4 and N2O between the atmosphere and two northern boreal ponds with catchments dominated by peatlands or forests. Plant and Soil, 242(1), 137–146.
136	G,Sweden	Sweden	Small lake and Pond	739.54	158.631	1	68.35	19.0406	280.34	599.37	0.000451	0.47	DE		150	PP			Burke et al. 2019; Kuhn et al. 2018	Kuhn et al., 2021	Burke, S. A., Wik, M., Lang, A., Contosta, A. R., Palace, M., Crill, P. M., & Varner, R. K. (2019). Long-term measurements of methane ebullition from thaw ponds. Journal of Geophysical Research: Biogeosciences, 124(14), 4102–4117.
137	GTH, United States of America	United States of America	Small lake and Pond	19.231	3.26081	1	68.67	-149.25	19.231				D		85.8	GP			Sepulveda-Jauregui et al. 2015	Johnson et al 2022	Sepulveda-Jauregui, A., Walter Anthony, K. M., Martinez-Cruz, K., Greene, S., and Thalasso, F.: Methane and carbon dioxide emissions from 40 lakes along a north–south latitudinal transect in Alaska, Biogeosciences, 12, 3197–3223,2015
302	Linnansuo peatland complex, Finland	Finland	Small lake and Pond	4.16145	1.061	2	62.5	30.5	4.16145				D		207.8	B			Hyvönen et al., 2013	Johnson et al 2022	Hyvönen, N. P., Huttunen, J. T., Shurpali, N. J., Lind, S. E., Marushchak, M. E., Heitto, L., & Martikainen, P. J. (2013). The role of drainage ditches in greenhouse gas emissions and surface leaching losses from a cutaway peatland cultivated with a perennial bioenergy crop. Boreal Environment Research, 18, 109–126
298	Lillisjöilidtjärnen, Sweden	Sweden	Small lake and Pond	9.5	2.28912	3	63.845	18.617	3.75333	5.74667			DE		187.8	GP			Klaus et al 2018	this study	Klaus, M., Geibrink, E., Jonsson, A., Bergström, A.-K., Bastviken, D., Laudon, H., Klaminder, J., and Karlsson, J.: Greenhouse gas emissions from boreal inland waters unchanged after forest harvesting, Biogeosciences, 15, 5575–5594, https://doi.org/10.5194/bg-15-5575-2018, 2018.
140	Gatton 1, Australia	Australia	Small lake and Pond	786.307	287.002	1	-27.5541	152.341	786.307		0.025903		D		365	TR		Eutrophic	Grinham et al 2018	Rosentreter et al., 2021	Grinham, A. et al. The importance of small artificial water bodies as sources of methane emissions in Queensland, Australia. Hydrology and Earth System Sciences Discussions 1–27 (2018). doi:10.5194/hess-2018-294
141	Gatton 2, Australia	Australia	Small lake and Pond	581.967	212.418	1	-27.5548	152.339	581.967		0.00345		D		365	TR		Eutrophic	Grinham et al 2018	Rosentreter et al., 2021	Grinham, A. et al. The importance of small artificial water bodies as sources of methane emissions in Queensland, Australia. Hydrology and Earth System Sciences Discussions 1–27 (2018). doi:10.5194/hess-2018-294
142	Gatton 3, Australia	Australia	Small lake and Pond	1150.91	420.083	1	-27.5615	152.343	1150.91		0.001041		D		365	TR		Mesotrophic	Grinham et al 2018	Rosentreter et al., 2021	Grinham, A. et al. The importance of small artificial water bodies as sources of methane emissions in Queensland, Australia. Hydrology and Earth System Sciences Discussions 1–27 (2018). doi:10.5194/hess-2018-294
143	Gatton 4, Australia	Australia	Small lake and Pond	63.1049	23.0333	1	-27.5625	152.345	63.1049		0.001893		D		365	TR		Eutrophic	Grinham et al 2018	Rosentreter et al., 2021	Grinham, A. et al. The importance of small artificial water bodies as sources of methane emissions in Queensland, Australia. Hydrology and Earth System Sciences Discussions 1–27 (2018). doi:10.5194/hess-2018-294
144	Gatton 5, Australia	Australia	Small lake and Pond	129.215	47.1634	1	-27.5537	152.35	129.215		0.030458		D		365	TR		Eutrophic	Grinham et al 2018	Rosentreter et al., 2021	Grinham, A. et al. The importance of small artificial water bodies as sources of methane emissions in Queensland, Australia. Hydrology and Earth System Sciences Discussions 1–27 (2018). doi:10.5194/hess-2018-294
145	Gatton 6, Australia	Australia	Small lake and Pond	1231.05	449.332	1	-27.5546	152.349	1231.05		0.000446		D		365	TR		Eutrophic	Grinham et al 2018	Rosentreter et al., 2021	Grinham, A. et al. The importance of small artificial water bodies as sources of methane emissions in Queensland, Australia. Hydrology and Earth System Sciences Discussions 1–27 (2018). doi:10.5194/hess-2018-294
146	Gavrilovka-1,Russia	Russia	Small lake and Pond	36	8.4024	1	56.8	82.75	36		0.0093	4.7	D		177	PP			Sabrekov et al. 2017	Kuhn et al., 2021	https://doi.org/10.5194/bg-14-3715-2017
147	Gavrilovka-2,Russia	Russia	Small lake and Pond	64.8	15.1243	1	56.8	82.75	64.8		0.0019	2.5	D		177	PP			Sabrekov et al. 2017	Kuhn et al., 2021	https://doi.org/10.5194/bg-14-3715-2017
148	Goldstream, United States of America	United States of America	Small lake and Pond	95.67	NA	1	64.928	-147.835		95.67	0.00845	3.3	E	Yes	NA	TH			Engram et al. 2020; Walter Anthony and Anthony 2013	Kuhn et al., 2021; Johnson et al 2022	https://doi.org/10.1038/s41558-020-0762-8; Walter Anthony, K. M., et al. (2013). Constraining spatial variability of methane ebullition seeps in Arctic lakes. Journal of Geophysical Research: Biogeosciences, 118(3), 1015–1034.
452	Stortjärn, Sweden	Sweden	Small lake and Pond	6.21	1.49636	3	64.262	19.763	1.48333	4.72667			DE		187.8	GP			Klaus et al 2018	this study	Klaus, M., Geibrink, E., Jonsson, A., Bergström, A.-K., Bastviken, D., Laudon, H., Klaminder, J., and Karlsson, J.: Greenhouse gas emissions from boreal inland waters unchanged after forest harvesting, Biogeosciences, 15, 5575–5594, https://doi.org/10.5194/bg-15-5575-2018, 2018.
150	GooseLake, United States of America	United States of America	Small lake and Pond	50.91	NA	1	64.913	-147.847		50.91	0.0277	4.3	E	Yes	NA	T			Engram et al. 2020	Kuhn et al., 2021	https://doi.org/10.1038/s41558-020-0762-8
453	Struptjärn, Sweden	Sweden	Small lake and Pond	5.35	1.28914	3	64.023	19.489	0.863333	4.48667			DE		187.8	GP			Klaus et al 2018	this study	Klaus, M., Geibrink, E., Jonsson, A., Bergström, A.-K., Bastviken, D., Laudon, H., Klaminder, J., and Karlsson, J.: Greenhouse gas emissions from boreal inland waters unchanged after forest harvesting, Biogeosciences, 15, 5575–5594, https://doi.org/10.5194/bg-15-5575-2018, 2018.
152	Gransjön/S7, Sweden	Sweden	Small lake and Pond	3.1014	0.871493	1	57.14	14.712	3.1014		0.045		D		245	GP			Bastviken et al., 2004	Johnson et al 2022	floodplain. Journal of Geophysical Research, 93(D2), 1574–1582.
495	Övre Björntjärn, Sweden	Sweden	Small lake and Pond	7.57667	1.82567	3	64.123	18.78	1.40667	6.17			DE		187.8	GP			Klaus et al 2018	this study	Klaus, M., Geibrink, E., Jonsson, A., Bergström, A.-K., Bastviken, D., Laudon, H., Klaminder, J., and Karlsson, J.: Greenhouse gas emissions from boreal inland waters unchanged after forest harvesting, Biogeosciences, 15, 5575–5594, https://doi.org/10.5194/bg-15-5575-2018, 2018.
154	Greenbank, Australia	Australia	Small lake and Pond	290.483	106.026	1	-27.7249	152.978	290.483		0.000575		D		365	TR		Mesotrophic	Grinham et al 2018	Rosentreter et al., 2021	Grinham, A. et al. The importance of small artificial water bodies as sources of methane emissions in Queensland, Australia. Hydrology and Earth System Sciences Discussions 1–27 (2018). doi:10.5194/hess-2018-294
155	H,Sweden	Sweden	Small lake and Pond	21.6	4.6332	1	68.35	19.033		21.6	0.000161	0.41	E	Yes	150	PP			Burke et al. 2019	Kuhn et al., 2021	https://doi.org/10.1029/2018JG004786
156	Hambre, Chile	Chile	Small lake and Pond	9.12	2.83596	1	-53.604	-70.953	9.12				D		287.8	B			Gerardo-Nieto et al., 2017	Johnson et al 2022	Gerardo-Nieto, O., Astorga-España, M. S., Mansilla, A., & Thalasso, F. (2017). Initial report on methane and carbon dioxide emission dynamics from sub-Antarctic freshwater ecosystems: A seasonal study of a lake and a reservoir. Science of the Total Environment, 593–594, 144–154.
104	Dam, United States of America	United States of America	Small lake and Pond	7.5	1.5405	1	68.38	-149.36	7.5				D		137	GP			Kling et al. 1992	Johnson et al 2022	Kling, G. W., Kipphut, G. W., & Miller, M. C. (1992). The flux of CO2 and CH4 from lakes and rivers in Arctic Alaska. Hydrobiologia, 240, 23–36
337	N1, United States of America	United States of America	Small lake and Pond	1.3	0.26702	1	68.38	-149.37	1.3				D		137	GP			Kling et al. 1992	Johnson et al 2022	Kling, G. W., Kipphut, G. W., & Miller, M. C. (1992). The flux of CO2 and CH4 from lakes and rivers in Arctic Alaska. Hydrobiologia, 240, 23–36
405	Pond386, United States of America	United States of America	Small lake and Pond	8	1.35648	1	69.35	-149.38	8				D		85.8	B			Kling et al. 1992	Johnson et al 2022	Kling, G. W., Kipphut, G. W., & Miller, M. C. (1992). The flux of CO2 and CH4 from lakes and rivers in Arctic Alaska. Hydrobiologia, 240, 23–36
160	Hubei, China	China	Small lake and Pond	28.4625	6.73878	2	30.7251	111.316	3.25375	25.2087	0.035	1.09	DE		181.8	T			Zhang et al. 2019; Zhang et al. 2018	Zheng et al., 2022	Zhang C, Cheng S, Li Y et al. (2019) Diel methane flux from a subtropical eutrophic pond in November based on continuous monitoring. Acta Geochimica, 38, 232-240.; 267. Zhang C, Cheng S, Long L et al. (2018) Diel and seasonal methane flux across water-air interface of a subtropic eutrophic pond. Toxicological & Environmental Chemistry, 100, 413-424.
486	William, United States of America	United States of America	Small lake and Pond	4.9	0.931	1	69.35	-149.38	4.9				D		115	TH			Kling et al. 1992	Johnson et al 2022	Kling, G. W., Kipphut, G. W., & Miller, M. C. (1992). The flux of CO2 and CH4 from lakes and rivers in Arctic Alaska. Hydrobiologia, 240, 23–36
487	Windy, United States of America	United States of America	Small lake and Pond	3.7	0.703	1	69.58	-149.44	3.7				D		115	TH			Kling et al. 1992	Johnson et al 2022	Kling, G. W., Kipphut, G. W., & Miller, M. C. (1992). The flux of CO2 and CH4 from lakes and rivers in Arctic Alaska. Hydrobiologia, 240, 23–36
163	IP, Siberia, Russia	Russia	Small lake and Pond	18.23	3.77762	1	72.3736	126.495	18.23			1.15	D		139.6	TR			Knoblauch et al. 2015	Zheng et al., 2022	Knoblauch C, Spott O, Evgrafova S et al. (2015) Regulation of methane production, oxidation, and emission by vascular plants and bryophytes in ponds of the northeast Siberian polygonal tundra. Journal of Geophysical Research: Biogeosciences, 120, 2525-2541.
477	Vesijärvi, Finland	Finland	Small lake and Pond	5.2603	1.3419	1	61.083	25.072	5.2603				D		208	T			Linnaluoma 2012	Johnson et al 2022	Linnaluoma, J. (2012). Factors controlling carbon gas fluxes in boreal lakes (Doctoral dissertation, University of Helsinki, Finland).
165	Indooroopilly, Australia	Australia	Small lake and Pond	413.688	150.996	1	-27.5027	152.988	413.688		0.000436		D		365	TR		Oligotrophic	Grinham et al 2018	Rosentreter et al., 2021	Grinham, A. et al. The importance of small artificial water bodies as sources of methane emissions in Queensland, Australia. Hydrology and Earth System Sciences Discussions 1–27 (2018). doi:10.5194/hess-2018-294
166	Infernao, Brazil	Brazil	Small lake and Pond	2.832	1.03368	1	-22.314	-46.302	2.832				D		365	TR			Ballester et al., 2001	Johnson et al 2022	Ballester, M. V. R., & Santos, J. E. (2001). Biogenic gases (CH4, CO2 and O2) distribution in a riverine wetland system. Oecologia Brasiliensis,9, 21–32.
303	Little Shingobee, United States of America	United States of America	Small lake and Pond	32.8889	8.77213	1	46.983	-94.683	32.8889				D		224.6	T			Michmerhuizen et al., 1996	Johnson et al 2022	Michmerhuizen, C. M., Striegl, R. G., & McDonald, M. E. (1996). Potential methane emission from north-temperate lakes following ice melt. Limnology and Oceanography, 41(5), 985–991.
168	Inre Harrsjön, Sweden	Sweden	Small lake and Pond	10.2333	2.19505	1	68.3584	19.047	6.6	6.93333	0.023	5.2	DE		150	GP			Jansen et al. 2020; Wik et al. 2013	Kuhn et al., 2021; Johnson et al 2022	NA
169	Interior Fen Ponds, Canada	Canada	Small lake and Pond	180	43.4232	1	51.3	-80.53	180		0.00035	0.45	D		188.2	PP			Hamilton et al. 1994	Johnson et al 2022	Hamilton, J. D., Kelly, C. A., Rudd, J. W. M., Hesslein, R. H., & Roulet, N. T. (1994). Flux to the atmosphere of CH4 and CO2 from wetland ponds on the Hudson Bay lowlands (HBLs). Journal of Geophysical Research, 99, 1495–1510.
430	Searsville Lake, United States of America	United States of America	Small lake and Pond	1.4616	0.484579	1	37.407	-122.238	1.4616				D		317.2	T			Miller and Oremland. 1988	Johnson et al 2022	Miller, L. G., & Oremland, R. S. (1988). Methane efflux from the pelagic regions of four lakes. Global Biogeochemical Cycles, 2(3), 269–277
171	Julieta, United States of America	United States of America	Small lake and Pond	90.384	15.3255	1	68.45	-149.37	18.269	72.115	0.051	7	DE		85.8	GP			Sepulveda-Jauregui et al. 2015	Johnson et al 2022	Sepulveda-Jauregui A, Walter Anthony KM, Martinez-Cruz K et al. (2015) Methane and carbon dioxide emissions from 40 lakes along a north-south latitudinal transect in Alaska. Biogeosciences, 12, 3197-3223
444	Soap Lake, Washington, United States of America	United States of America	Small lake and Pond	2.304	0.662907	1	47.388	-119.488	2.304				D		254.6	T			Miller and Oremland. 1988	Johnson et al 2022	Miller, L. G., & Oremland, R. S. (1988). Methane efflux from the pelagic regions of four lakes. Global Biogeochemical Cycles, 2(3), 269–277
173	KAMK, India	India	Small lake and Pond	215.52	78.6648	1	10.189	76.379	11.68	203.84			DE		365	TR			Selvam et al., 2014	this study	Selvam BP, Natchimuthu S, Arunachalam L et al. (2014) Methane and carbon dioxide emissions from inland waters in India-implications for large scale greenhouse gas balances. Global Change Biology, 20, 3397-3407.
174	KWK 11, Canada	Canada	Small lake and Pond	1	0.24054	1	55.16	-77.46	1				D		187.2	TH			Laurion et al. 2010	Johnson et al 2022	Laurion, I., Vincent, W. F., MacIntyre, S., Retamal, L., Dupont, C., Francus, P., & Pienitz, R. (2010). Variability in greenhouse gas emissions from permafrost thaw ponds. Limnology and Oceanography, 55(1), 115-133.
175	KWK 2, Canada	Canada	Small lake and Pond	0.6	0.144324	1	55.16	-77.46	0.6			2.6	D		187.2	TH			Laurion et al. 2010	Johnson et al 2022	Laurion, I., Vincent, W. F., MacIntyre, S., Retamal, L., Dupont, C., Francus, P., & Pienitz, R. (2010). Variability in greenhouse gas emissions from permafrost thaw ponds. Limnology and Oceanography, 55(1), 115-133.
176	KWK 21, Canada	Canada	Small lake and Pond	0.5	0.12027	1	55.16	-77.46	0.5				D		187.2	TH			Laurion et al. 2010	Johnson et al 2022	Laurion, I., Vincent, W. F., MacIntyre, S., Retamal, L., Dupont, C., Francus, P., & Pienitz, R. (2010). Variability in greenhouse gas emissions from permafrost thaw ponds. Limnology and Oceanography, 55(1), 115-133.
177	KWK 23, Canada	Canada	Small lake and Pond	1.1	0.264594	1	55.16	-77.46	1.1				D		187.2	TH			Laurion et al. 2010	Johnson et al 2022	Laurion, I., Vincent, W. F., MacIntyre, S., Retamal, L., Dupont, C., Francus, P., & Pienitz, R. (2010). Variability in greenhouse gas emissions from permafrost thaw ponds. Limnology and Oceanography, 55(1), 115-133.
178	KWK 3, Canada	Canada	Small lake and Pond	2.9	0.697566	1	55.16	-77.46	2.9				D		187.2	TH			Laurion et al. 2010	Johnson et al 2022	Laurion, I., Vincent, W. F., MacIntyre, S., Retamal, L., Dupont, C., Francus, P., & Pienitz, R. (2010). Variability in greenhouse gas emissions from permafrost thaw ponds. Limnology and Oceanography, 55(1), 115-133.
179	KWK 33, Canada	Canada	Small lake and Pond	2.2	0.529188	1	55.16	-77.46	2.2				D		187.2	TH			Laurion et al. 2010	Johnson et al 2022	Laurion, I., Vincent, W. F., MacIntyre, S., Retamal, L., Dupont, C., Francus, P., & Pienitz, R. (2010). Variability in greenhouse gas emissions from permafrost thaw ponds. Limnology and Oceanography, 55(1), 115-133.
180	KWK 35, Canada	Canada	Small lake and Pond	0.5	0.12027	1	55.16	-77.46	0.5				D		187.2	TH			Laurion et al. 2010	Johnson et al 2022	Laurion, I., Vincent, W. F., MacIntyre, S., Retamal, L., Dupont, C., Francus, P., & Pienitz, R. (2010). Variability in greenhouse gas emissions from permafrost thaw ponds. Limnology and Oceanography, 55(1), 115-133.
181	KWK 36, Canada	Canada	Small lake and Pond	1.4	0.336756	1	55.16	-77.46	1.4				D		187.2	TH			Laurion et al. 2010	Johnson et al 2022	Laurion, I., Vincent, W. F., MacIntyre, S., Retamal, L., Dupont, C., Francus, P., & Pienitz, R. (2010). Variability in greenhouse gas emissions from permafrost thaw ponds. Limnology and Oceanography, 55(1), 115-133.
182	KWK 38, Canada	Canada	Small lake and Pond	7.2	1.73189	1	55.16	-77.46	7.2				D		187.2	TH			Laurion et al. 2010	Johnson et al 2022	Laurion, I., Vincent, W. F., MacIntyre, S., Retamal, L., Dupont, C., Francus, P., & Pienitz, R. (2010). Variability in greenhouse gas emissions from permafrost thaw ponds. Limnology and Oceanography, 55(1), 115-133.
183	KWK 6, Canada	Canada	Small lake and Pond	0.8	0.192432	1	55.16	-77.46	0.8				D		187.2	TH			Laurion et al. 2010	Johnson et al 2022	Laurion, I., Vincent, W. F., MacIntyre, S., Retamal, L., Dupont, C., Francus, P., & Pienitz, R. (2010). Variability in greenhouse gas emissions from permafrost thaw ponds. Limnology and Oceanography, 55(1), 115-133.
184	KWK 7, Canada	Canada	Small lake and Pond	0.8	0.192432	1	55.16	-77.46	0.8				D		187.2	TH			Laurion et al. 2010	Johnson et al 2022	Laurion, I., Vincent, W. F., MacIntyre, S., Retamal, L., Dupont, C., Francus, P., & Pienitz, R. (2010). Variability in greenhouse gas emissions from permafrost thaw ponds. Limnology and Oceanography, 55(1), 115-133.
185	KWK1, Canada	Canada	Small lake and Pond	0.6	0.144324	1	55.16	-77.46	0.6				D		187.2	TH			Laurion et al. 2010	Johnson et al 2022	Laurion, I., Vincent, W. F., MacIntyre, S., Retamal, L., Dupont, C., Francus, P., & Pienitz, R. (2010). Variability in greenhouse gas emissions from permafrost thaw ponds. Limnology and Oceanography, 55(1), 115-133.
106	Deep Pool, Canada	Canada	Small lake and Pond	10.6	2.63728	1	51.2	-80.6	10.6				D		199	TH			Moore et al. 1994	Johnson et al 2022	Moore, T. R., Heyes, A., & Roulet, N. T. (1994). Methane emissions from wetlands, southern Hudson Bay Lowland. Journal of Geophysical Research: Atmospheres, 99(D1), 1455–1465 (or appropriate page range).
187	Killarney, United States of America	United States of America	Small lake and Pond	140.132	32.8443	1	64.87	-147.901	29.139	125.563	0.004005	2.1	DE		178.4	TH			Engram et al. 2020; Sepulveda-Jauregui et al. 2015	Kuhn et al., 2021; Johnson et al 2022	Sepulveda-Jauregui, A., Walter Anthony, K. M., Martinez-Cruz, K., Greene, S., & Thalasso, F. (2015). Methane and carbon dioxide emissions from 40 lakes along a north-south latitudinal transect in Alaska. Biogeosciences, 12(11), 3197–3223
188	Kinosheo Bog Ponds, Canada	Canada	Small lake and Pond	110	26.8752	1	51.33	-81.5	110				D		192.6	PP			Hamilton et al. 1994	Johnson et al 2022	Hamilton, J. D., Kelly, C. A., Rudd, J. W. M., Hesslein, R. H., & Roulet, N. T. (1994). Flux to the atmosphere of CH4 and CO2 from wetland ponds on the Hudson Bay lowlands (HBLs). Journal of Geophysical Research, 99, 1495–1510.
189	Korte Loef, Netherlands	Netherlands	Small lake and Pond	186.977	68.2468	1	51.7742	5.85473	26.7111	160.266	0.0046		DE		365	T		Eutrophic	van Bergen et al., 2019	Rosentreter et al., 2021	van Bergen, T. J. H. M. et al. Seasonal and diel variation in greenhouse gas emissions from an urban pond and its major drivers. Limnology and Oceanography lno.11173 (2019). doi:10.1002/lno.11173
38	Alaskan lakes, United States of America	United States of America	Small lake and Pond	31.1	5.417	2	73.665	-148.75	31.1				D		92.4	TH			Morrisey and Livingston 1992; Whalen and Reeburgh 1990	Johnson et al 2022	Morrissey, L. A., & Livingston, G. P. (1992). Methane flux from tundra ecosystems in Arctic Alaska: An assessment of local spatial variability. Journal of Geophysical Research, 97(D15), 16,661–16,670.; Whalen, S. C., & Reeburgh, W. S. (1992). Interannual variations in tundra methane emission: A 4-year time-series at Barrow, Alaska. Journal of Geophysical Research, 97(D15), 16,645–16,660.
191	L1, Brazil	Brazil	Small lake and Pond	141.169	51.5267	2	-19.021	-57.548	9.7169	131.452	0.06		DE		365	TR			Peixoto et al., 2015; Bastviken et al., 2010	this study; Johnson et al 2022	Peixoto, R. B., Machado-Silva, F., Marotta, H., Enrich-Prast, A., & Bastviken, D. (2015). Spatial versus day-to-day within-lake variability in tropical floodplain lake CH4 emissions—Developing optimized approaches to representative flux measurements. PLoS One, 10(4), e0123319. ; Bastviken, D., Tranvik, L. J., Downing, J. A., Crill, P. M., & Enrich-Prast, A. (2011). Freshwater methane emissions of…
192	L1,Canada	Canada	Small lake and Pond	153.776	33.5232	1	59.4802	-117.183	78.294	75.4821	0.004	1	DE		155	PP			Kuhn et al. unpublished	Kuhn et al., 2021	Kuhn, M. A., Varner, R. K., Bastviken, D., Crill, P., MacIntyre, S., Turetsky, M., Walter Anthony, K., McGuire, A. D., & Olefeldt, D. (2021). BAWLD-CH&lt;sub&gt;4&lt;/sub&gt;: A comprehensive dataset of methane fluxes from boreal and arctic ecosystems. Earth System Science Data, 13(11), 5151–5189. https://doi.org/10.5194/essd-13-5151-2021
193	L2,Canada	Canada	Small lake and Pond	60.3726	13.1612	1	59.4454	-117.268	28.8397	31.5329	0.027	2.5	DE		155	PP			Kuhn et al. unpublished	Kuhn et al., 2021	Kuhn, M. A., Varner, R. K., Bastviken, D., Crill, P., MacIntyre, S., Turetsky, M., Walter Anthony, K., McGuire, A. D., & Olefeldt, D. (2021). BAWLD-CH&lt;sub&gt;4&lt;/sub&gt;: A comprehensive dataset of methane fluxes from boreal and arctic ecosystems. Earth System Science Data, 13(11), 5151–5189. https://doi.org/10.5194/essd-13-5151-2021
194	L3,Canada	Canada	Small lake and Pond	86.4093	18.8372	1	59.2257	-117.463	41.3441	45.0651	0.1	1.2	DE		155	PP			Kuhn et al. unpublished	Kuhn et al., 2021	Kuhn, M. A., Varner, R. K., Bastviken, D., Crill, P., MacIntyre, S., Turetsky, M., Walter Anthony, K., McGuire, A. D., & Olefeldt, D. (2021). BAWLD-CH&lt;sub&gt;4&lt;/sub&gt;: A comprehensive dataset of methane fluxes from boreal and arctic ecosystems. Earth System Science Data, 13(11), 5151–5189. https://doi.org/10.5194/essd-13-5151-2021
195	L4,Canada	Canada	Small lake and Pond	180.583	39.3671	1	59.484	-117.181	86.4035	94.1798	0.003	0.8	DE		155	PP			Kuhn et al. unpublished	Kuhn et al., 2021	Kuhn, M. A., Varner, R. K., Bastviken, D., Crill, P., MacIntyre, S., Turetsky, M., Walter Anthony, K., McGuire, A. D., & Olefeldt, D. (2021). BAWLD-CH&lt;sub&gt;4&lt;/sub&gt;: A comprehensive dataset of methane fluxes from boreal and arctic ecosystems. Earth System Science Data, 13(11), 5151–5189. https://doi.org/10.5194/essd-13-5151-2021
196	L5,Canada	Canada	Small lake and Pond	10.797	2.35375	1	59.3534	-117.315	10.4418	0.355245	0.019	0.75	DE		155	PP			Kuhn et al. unpublished	Kuhn et al., 2021	Kuhn, M. A., Varner, R. K., Bastviken, D., Crill, P., MacIntyre, S., Turetsky, M., Walter Anthony, K., McGuire, A. D., & Olefeldt, D. (2021). BAWLD-CH&lt;sub&gt;4&lt;/sub&gt;: A comprehensive dataset of methane fluxes from boreal and arctic ecosystems. Earth System Science Data, 13(11), 5151–5189. https://doi.org/10.5194/essd-13-5151-2021
314	MG, Russia	Russia	Small lake and Pond	133.1	24.8418	1	62	129.44	133.1				D		110.2	TH			Nakayama et al. 1994	Johnson et al 2022	Nakayama, T., Nojiri, Y., & Zeng, Y. (1994). Measurement of methane flux from alasses around Yakutsk, Eastern Siberia in 1993, In G. Inoue (Ed.). Proceedings of the second symposium on the joint siberian permafrost studies between Japan and Russia in 1993, (pp. 40–44). National Institute for Environmental Studies,
415	RS1, Russia	Russia	Small lake and Pond	267.9	50.0009	1	62	129.44	267.9				D		110.2	TH			Nakayama et al. 1994	Johnson et al 2022	Nakayama, T., Nojiri, Y., & Zeng, Y. (1994). Measurement of methane flux from alasses around Yakutsk, Eastern Siberia in 1993, In G. Inoue (Ed.). Proceedings of the second symposium on the joint siberian permafrost studies between Japan and Russia in 1993, (pp. 40–44). National Institute for Environmental Studies,
416	RS2, Russia	Russia	Small lake and Pond	829.8	154.874	1	62	129.44	829.8				D		110.2	TH			Nakayama et al. 1994	Johnson et al 2022	Nakayama, T., Nojiri, Y., & Zeng, Y. (1994). Measurement of methane flux from alasses around Yakutsk, Eastern Siberia in 1993, In G. Inoue (Ed.). Proceedings of the second symposium on the joint siberian permafrost studies between Japan and Russia in 1993, (pp. 40–44). National Institute for Environmental Studies,
301	Linkoping University, Sweden	Sweden	Small lake and Pond	105.15	37.2168	4	58.394	15.6	7.725	97.425	0.0012		DE		349.2	T			Natchimuthu et al 2014	this study	Natchimuthu, S., Selvam, B. P., & Bastviken, D. (2014). Influence of weather variables on methane and carbon dioxide flux from a shallow pond. Biogeochemistry, 119(1–3), 403–413.
201	LKg1,Russia	Russia	Small lake and Pond	4.418	0.919828	1	62.3403	74.2636	4.418		0.006884	1.2	D		141	T			Serikova et al. 2019	Kuhn et al., 2021	https://doi.org/10.1038/s41467-019-09592-1
202	LKg10,Russia	Russia	Small lake and Pond	1.336	0.278155	1	62.3536	74.3228	1.336		0.00598	1	D		141	T			Serikova et al. 2019	Kuhn et al., 2021	https://doi.org/10.1038/s41467-019-09592-1
203	LKg11,Russia	Russia	Small lake and Pond	7.017	1.46094	1	62.2583	74.2539	7.017		0.166011	1.56667	D		141	PP			Serikova et al. 2019	Kuhn et al., 2021	https://doi.org/10.1038/s41467-019-09592-1
204	LKg12,Russia	Russia	Small lake and Pond	9.619	2.00268	1	62.2525	74.2603	9.619		0.008886	1.525	D		141	T			Serikova et al. 2019	Kuhn et al., 2021	https://doi.org/10.1038/s41467-019-09592-1
205	LKg17,Russia	Russia	Small lake and Pond	13.587	2.82881	1	62.3861	74.2519	13.587		0.007274	1	D		141	T			Serikova et al. 2019	Kuhn et al., 2021	https://doi.org/10.1038/s41467-019-09592-1
206	LKg18,Russia	Russia	Small lake and Pond	8.112	1.68892	1	62.3814	74.305	8.112		0.010694	1.225	D		141	GP			Serikova et al. 2019	Kuhn et al., 2021	https://doi.org/10.1038/s41467-019-09592-1
207	LKg19,Russia	Russia	Small lake and Pond	27.911	5.81107	1	62.3742	74.2619	27.911		0.004926	1.25	D		141	T			Serikova et al. 2019	Kuhn et al., 2021	https://doi.org/10.1038/s41467-019-09592-1
208	LKg20,Russia	Russia	Small lake and Pond	11.706	2.43719	1	62.3633	74.275	11.706		0.007074	1.15	D		141	T			Serikova et al. 2019	Kuhn et al., 2021	https://doi.org/10.1038/s41467-019-09592-1
209	LKg7,Russia	Russia	Small lake and Pond	47.654	9.92156	1	62.3497	74.2258	47.654		0.001495	0.9	D		141	T			Serikova et al. 2019	Kuhn et al., 2021	https://doi.org/10.1038/s41467-019-09592-1
210	LKg8,Russia	Russia	Small lake and Pond	96.486	20.0884	1	62.3553	74.1936	96.486		0.000375	0.15	D		141	T			Serikova et al. 2019	Kuhn et al., 2021	https://doi.org/10.1038/s41467-019-09592-1
211	LKg9,Russia	Russia	Small lake and Pond	5.7	1.18674	1	62.3531	74.1847	5.7		0.002374	0.975	D		141	T			Serikova et al. 2019	Kuhn et al., 2021	https://doi.org/10.1038/s41467-019-09592-1
212	LKh10, Russia	Russia	Small lake and Pond	6.223	1.2782	1	63.9403	75.6042	6.223		0.00039	0.225	D		137	T			Serikova et al. 2019	Kuhn et al., 2021	https://doi.org/10.1038/s41467-019-09592-1
213	LKh11, Russia	Russia	Small lake and Pond	3.614	0.742316	1	63.9444	75.6053	3.614		0.001186	0.45	D		137	T			Serikova et al. 2019	Kuhn et al., 2021	https://doi.org/10.1038/s41467-019-09592-1
214	LKh12, Russia	Russia	Small lake and Pond	35.194	7.22885	1	63.9167	75.5886	35.194		0.000319	0.175	D		137	T			Serikova et al. 2019	Kuhn et al., 2021	https://doi.org/10.1038/s41467-019-09592-1
215	LKh13, Russia	Russia	Small lake and Pond	6.32	1.29813	1	63.9189	75.5842	6.32		0.000322	0.2625	D		137	T			Serikova et al. 2019	Kuhn et al., 2021	https://doi.org/10.1038/s41467-019-09592-1
216	LKh14,Russia	Russia	Small lake and Pond	7.157	1.47005	1	63.8103	75.6694	7.157			0.1	D		137	U			Serikova et al. 2019	Kuhn et al., 2021	https://doi.org/10.1038/s41467-019-09592-1
217	LKh15, Russia	Russia	Small lake and Pond	3.082	0.633043	1	63.9303	75.5747	3.082		0.000638	0.2	D		137	T			Serikova et al. 2019	Kuhn et al., 2021	https://doi.org/10.1038/s41467-019-09592-1
218	LKh16, Russia	Russia	Small lake and Pond	23.029	4.73016	1	63.9308	75.5703	23.029		0.000274	0.175	D		137	T			Serikova et al. 2019	Kuhn et al., 2021	https://doi.org/10.1038/s41467-019-09592-1
219	LKh17, Russia	Russia	Small lake and Pond	7.234	1.48586	1	63.9339	75.5583	7.234		0.009238	0.6	D		137	T			Serikova et al. 2019	Kuhn et al., 2021	https://doi.org/10.1038/s41467-019-09592-1
220	LKh18, Russia	Russia	Small lake and Pond	0.38	0.078052	1	63.9161	75.5539	0.38		0.033159	0.716667	D		137	GP			Serikova et al. 2019	Kuhn et al., 2021	https://doi.org/10.1038/s41467-019-09592-1
221	LKh2,Russia	Russia	Small lake and Pond	11.087	2.27727	1	63.8017	75.7408	11.087		0.002106	0.3375	D		137	T			Serikova et al. 2019	Kuhn et al., 2021	https://doi.org/10.1038/s41467-019-09592-1
222	LKh8, Russia	Russia	Small lake and Pond	3.081	0.632837	1	63.945	75.6761	3.081		1.23686	0.833333	D		137	PP			Serikova et al. 2019	Kuhn et al., 2021	https://doi.org/10.1038/s41467-019-09592-1
223	LKh9, Russia	Russia	Small lake and Pond	1.317	0.270512	1	63.9339	75.6119	1.317		0.01022	0.516667	D		137	GP			Serikova et al. 2019	Kuhn et al., 2021	https://doi.org/10.1038/s41467-019-09592-1
224	LT1,Russia	Russia	Small lake and Pond	12.033	2.25258	1	67.4161	78.7019	12.033		0.007996	1.26667	D		111	T			Serikova et al. 2019	Kuhn et al., 2021	https://doi.org/10.1038/s41467-019-09592-1
225	LT10,Russia	Russia	Small lake and Pond	8.958	1.67694	1	67.3783	78.6314	8.958		0.003815	1.53333	D		111	T			Serikova et al. 2019	Kuhn et al., 2021	https://doi.org/10.1038/s41467-019-09592-1
226	LT11, Russia	Russia	Small lake and Pond	1.506	0.281923	1	67.3569	78.7611	1.506		0.010637	1.8	D		111	GP			Serikova et al. 2019	Kuhn et al., 2021	https://doi.org/10.1038/s41467-019-09592-1
227	LT12,Russia	Russia	Small lake and Pond	3.624	0.678413	1	67.3731	78.6956	3.624		0.06134	1.43333	D		111	GP			Serikova et al. 2019	Kuhn et al., 2021	https://doi.org/10.1038/s41467-019-09592-1
228	LT13,Russia	Russia	Small lake and Pond	12.642	2.36658	1	67.3833	78.6492	12.642		0.016882	1.95	D		111	GP			Serikova et al. 2019	Kuhn et al., 2021	https://doi.org/10.1038/s41467-019-09592-1
229	LT14,Russia	Russia	Small lake and Pond	20.874	3.90761	1	67.3639	78.7436	20.874		0.034225	1.8	D		111	GP			Serikova et al. 2019	Kuhn et al., 2021	https://doi.org/10.1038/s41467-019-09592-1
230	LT15,Russia	Russia	Small lake and Pond	23.669	4.43084	1	67.3797	78.7678	23.669		0.085377	0.366667	D		111	GP			Serikova et al. 2019	Kuhn et al., 2021	https://doi.org/10.1038/s41467-019-09592-1
231	LT16,Russia	Russia	Small lake and Pond	8.983	1.68162	1	67.4278	78.7303	8.983		0.059483	0.8	D		111	GP			Serikova et al. 2019	Kuhn et al., 2021	https://doi.org/10.1038/s41467-019-09592-1
232	LT2,Russia	Russia	Small lake and Pond	12.448	2.33027	1	67.4542	78.6939	12.448		0.144461	1.2	D		111	PP			Serikova et al. 2019	Kuhn et al., 2021	https://doi.org/10.1038/s41467-019-09592-1
233	LT3,Russia	Russia	Small lake and Pond	30.45	5.70024	1	67.3689	78.6731	30.45		0.155044	1.06667	D		111	PP			Serikova et al. 2019	Kuhn et al., 2021	https://doi.org/10.1038/s41467-019-09592-1
234	LT4,Russia	Russia	Small lake and Pond	16.057	3.00587	1	67.3775	78.6414	16.057		0.265925	0.916667	D		111	PP			Serikova et al. 2019	Kuhn et al., 2021	https://doi.org/10.1038/s41467-019-09592-1
235	LT5,Russia	Russia	Small lake and Pond	25.557	4.78427	1	67.4447	78.6344	25.557		0.079297	1.09167	D		111	GP			Serikova et al. 2019	Kuhn et al., 2021	https://doi.org/10.1038/s41467-019-09592-1
236	LT6,Russia	Russia	Small lake and Pond	29.138	5.45463	1	67.4536	78.6094	29.138		0.027603	1.45	D		111	GP			Serikova et al. 2019	Kuhn et al., 2021	https://doi.org/10.1038/s41467-019-09592-1
237	LT7,Russia	Russia	Small lake and Pond	8.333	1.55994	1	67.5131	78.6436	8.333		0.008816	2.03333	D		111	T			Serikova et al. 2019	Kuhn et al., 2021	https://doi.org/10.1038/s41467-019-09592-1
238	LT8,Russia	Russia	Small lake and Pond	12.767	2.38998	1	67.4528	78.6444	12.767		0.788274	0.583333	D		111	PP			Serikova et al. 2019	Kuhn et al., 2021	https://doi.org/10.1038/s41467-019-09592-1
239	LT9,Russia	Russia	Small lake and Pond	15.52	2.90534	1	67.3922	78.6611	15.52		0.060137	1.66667	D		111	GP			Serikova et al. 2019	Kuhn et al., 2021	https://doi.org/10.1038/s41467-019-09592-1
240	LU1,Russia	Russia	Small lake and Pond	27.974	5.37381	1	66.0883	78.5478	27.974		0.022171	0.4	D		118	GP			Serikova et al. 2019	Kuhn et al., 2021	https://doi.org/10.1038/s41467-019-09592-1
241	LU10,Russia	Russia	Small lake and Pond	37.595	7.222	1	66.1247	78.5275	37.595		0.000115	0.583333	D		118	T			Serikova et al. 2019	Kuhn et al., 2021	https://doi.org/10.1038/s41467-019-09592-1
242	LU11,Russia	Russia	Small lake and Pond	54.944	10.5547	1	66.0167	78.5514	54.944		0.000205	0.583333	D		118	T			Serikova et al. 2019	Kuhn et al., 2021	https://doi.org/10.1038/s41467-019-09592-1
243	LU12,Russia	Russia	Small lake and Pond	8.466	1.62632	1	66.0172	78.5778	8.466		0.003457	0.8	D		118	T			Serikova et al. 2019	Kuhn et al., 2021	https://doi.org/10.1038/s41467-019-09592-1
244	LU13,Russia	Russia	Small lake and Pond	32.154	6.17678	1	66.1603	78.6636	32.154		0.01402	0.783333	D		118	GP			Serikova et al. 2019	Kuhn et al., 2021	https://doi.org/10.1038/s41467-019-09592-1
245	LU14,Russia	Russia	Small lake and Pond	78.185	15.0193	1	66.1347	78.6311	78.185		0.001562	0.8	D		118	T			Serikova et al. 2019	Kuhn et al., 2021	https://doi.org/10.1038/s41467-019-09592-1
246	LU15,Russia	Russia	Small lake and Pond		0	1	66.1292	78.6408			0.000381	0.366667			118	T			Serikova et al. 2019	Kuhn et al., 2021	https://doi.org/10.1038/s41467-019-09592-1
247	LU16,Russia	Russia	Small lake and Pond	17.364	3.33562	1	66.0289	78.5506	17.364		0.008956	0.525	D		118	T			Serikova et al. 2019	Kuhn et al., 2021	https://doi.org/10.1038/s41467-019-09592-1
248	LU17,Russia	Russia	Small lake and Pond	46.864	9.00257	1	66.0319	78.5731	46.864		0.001469	0.7	D		118	T			Serikova et al. 2019	Kuhn et al., 2021	https://doi.org/10.1038/s41467-019-09592-1
249	LU18,Russia	Russia	Small lake and Pond	3.409	0.654869	1	66.0281	78.6186	3.409		0.000736	0.6	D		118	T			Serikova et al. 2019	Kuhn et al., 2021	https://doi.org/10.1038/s41467-019-09592-1
250	LU2,Russia	Russia	Small lake and Pond	12.92	2.48193	1	66.1142	78.5361	12.92		0.056694	0.6	D		118	GP			Serikova et al. 2019	Kuhn et al., 2021	https://doi.org/10.1038/s41467-019-09592-1
251	LU3,Russia	Russia	Small lake and Pond	10.566	2.02973	1	66.1181	78.5969	10.566		0.019597	0.583333	D		118	GP			Serikova et al. 2019	Kuhn et al., 2021	https://doi.org/10.1038/s41467-019-09592-1
252	LU4,Russia	Russia	Small lake and Pond	62.955	12.0937	1	66.1303	78.5914	62.955		0.000545	0.583333	D		118	T			Serikova et al. 2019	Kuhn et al., 2021	https://doi.org/10.1038/s41467-019-09592-1
253	LU5,Russia	Russia	Small lake and Pond	36.688	7.04776	1	66.1411	78.6153	36.688		0.009532	0.883333	D		118	T			Serikova et al. 2019	Kuhn et al., 2021	https://doi.org/10.1038/s41467-019-09592-1
254	LU6,Russia	Russia	Small lake and Pond	10.278	1.9744	1	66.1533	78.5461	10.278		0.018287	0.716667	D		118	GP			Serikova et al. 2019	Kuhn et al., 2021	https://doi.org/10.1038/s41467-019-09592-1
255	LU7,Russia	Russia	Small lake and Pond	51.979	9.98517	1	66.1342	78.6428	51.979		0.033083	0.916667	D		118	GP			Serikova et al. 2019	Kuhn et al., 2021	https://doi.org/10.1038/s41467-019-09592-1
256	LU8,Russia	Russia	Small lake and Pond	1.95	0.374595	1	66.1081	78.6439	1.95		0.017189	0.168333	D		118	GP			Serikova et al. 2019	Kuhn et al., 2021	https://doi.org/10.1038/s41467-019-09592-1
257	LU9,Russia	Russia	Small lake and Pond	53.731	10.3217	1	66.1089	78.5328	53.731		0.000115	0.2	D		118	T			Serikova et al. 2019	Kuhn et al., 2021	https://doi.org/10.1038/s41467-019-09592-1
135	Följesjön, Sweden	Sweden	Small lake and Pond	56.0029	19.8138	7	58.376	12.152	25.6029	30.4	0.0375	1.2	DE		349	T			Natchimuthu et al 2016	this study	Natchimuthu, S., Sundgren, I., Gålfalk, M., Klemedtsson, L., Crill, P., Danielsson, Å., & Bastviken, D. (2016). Spatio-temporal variability of lake CH₄ fluxes and its influence on annual whole-lake emission estimates. Limnology and Oceanography, 61(S1), S13–S26
121	Erssjön, Sweden	Sweden	Small lake and Pond	10.1998	3.60869	10	58.3713	12.1606	5.0798	5.68889	0.061	5	DE		349	T			Natchimuthu et al 2016; Podgrajsek et al., 2016; Rinta et al., 2016	this study; Johnson et al 2022	Natchimuthu, S., Sundgren, I., Gålfalk, M., Klemedtsson, L., Crill, P., Danielsson, Å., & Bastviken, D. (2016). Spatio-temporal variability of lake CH₄ fluxes and its influence on annual whole-lake emission estimates. Limnology and Oceanography, 61(S1), S13–S26;
200	LJR, Sweden	Sweden	Small lake and Pond	2.715	0.654206	4	64.093	18.93	2.29	0.425			DE		187.8	GP			Pajala et al. 2023	this study	Pajala, G., Sawakuchi, H. O., Rudberg, D., Schenk, J., Sieczko, A., Gålfalk, M., Seekell, D., Sundgren, I., Nguyen, T. D., Karlsson, J., & Bastviken, D. (2023). The effects of water column dissolved oxygen concentrations on lake methane emissions—Results from a whole-lake oxygenation experiment. Journal of Geophysical Research: Biogeosciences, 128(11), e2022JG007185
197	LG1, Canada	Canada	Small lake and Pond	68.5	16.4003	8	53.54	-78.46	68.5				D		185.6	PP			Pelletier et al. 2007	Johnson et al 2022	Pelletier, L., T. R. Moore, N. T. Roulet, M. Garneau, and V. Beaulieu-Audy (2007), Methane fluxes from three peatlands in the La Grande Rivie `re watershed, James Bay lowland, Canada, J. Geophys. Res., 112, G01018
198	LG2, Canada	Canada	Small lake and Pond	45.2	10.8724	5	53.38	-77.43	45.2				D		187.2	PP			Pelletier et al. 2007	Johnson et al 2022	Pelletier, L., T. R. Moore, N. T. Roulet, M. Garneau, and V. Beaulieu-Audy (2007), Methane fluxes from three peatlands in the La Grande Rivie `re watershed, James Bay lowland, Canada, J. Geophys. Res., 112, G01018
199	LG3, Canada	Canada	Small lake and Pond	250	60.135	5	53.34	-76.08	250				D		187.2	PP			Pelletier et al. 2007	Johnson et al 2022	Pelletier, L., T. R. Moore, N. T. Roulet, M. Garneau, and V. Beaulieu-Audy (2007), Methane fluxes from three peatlands in the La Grande Rivie `re watershed, James Bay lowland, Canada, J. Geophys. Res., 112, G01018
373	Peatland pool 1, Canada	Canada	Small lake and Pond	28.1	7.28633	1	49.08	-68.17	28.1		0.0005	2	D		214	PP			Pelletier et al. 2014	Johnson et al 2022	Pelletier, L., Strachan, I. B., Garneau, M., & Roulet, N. T. (2014). Carbon release from Boreal peatland open water pools: Implication for the contemporary C exchange. Journal of Geophysical Research: Biogeosciences, 119, 207–222.
374	Peatland pool 2, Canada	Canada	Small lake and Pond	18.7	4.84891	1	49.08	-68.17	18.7		0.0001	0.7	D		214	PP			Pelletier et al. 2014	Johnson et al 2022	Pelletier, L., Strachan, I. B., Garneau, M., & Roulet, N. T. (2014). Carbon release from Boreal peatland open water pools: Implication for the contemporary C exchange. Journal of Geophysical Research: Biogeosciences, 119, 207–222.
266	Lago Coyol, Mexico	Mexico	Small lake and Pond	390	142.35	1	19.16	-96.147	390				D		365	T			Gonzalez-Valencia et al., 2014	Johnson et al 2022	Gonzalez-Valencia, R., Sepulveda-Jauregui, A., Martinez-Cruz, K., Hoyos-Santillan, J., Dendooven, L., & Thalasso, F. (2014). Methane emissions from Mexican freshwater bodies: Correlations with water pollution. Hydrobiologia, 721, 9–22.
267	Lago El Llano, Mexico	Mexico	Small lake and Pond	114.1	41.6465	1	19.657	-99.508	114.1				D		365	T			Gonzalez-Valencia et al., 2014	Johnson et al 2022	Gonzalez-Valencia, R., Sepulveda-Jauregui, A., Martinez-Cruz, K., Hoyos-Santillan, J., Dendooven, L., & Thalasso, F. (2014). Methane emissions from Mexican freshwater bodies: Correlations with water pollution. Hydrobiologia, 721, 9–22.
268	Lake 1 Gyda, Russia	Russia	Small lake and Pond	12.7	2.49834	1	70.54	78.32	12.7			2.5	D		124.6	B			Golubyatnikov and Kazantsev 2013	Johnson et al 2022	Golubyatnikov, L. L., & Kazantsev, V. S. (2013). Contribution of tundra lakes in Western Siberia to the atmospheric methane budget. Izvestiya - Atmospheric and Oceanic Physics, 49(4), 395–403.
269	Lake 1 Tazovskii, Russia	Russia	Small lake and Pond	70.3	13.8294	1	67.11	78.55	70.3			3	D		124.6	TH			Golubyatnikov and Kazantsev 2013	Johnson et al 2022	Golubyatnikov, L. L., & Kazantsev, V. S. (2013). Contribution of tundra lakes in Western Siberia to the atmospheric methane budget. Izvestiya - Atmospheric and Oceanic Physics, 49(4), 395–403.
270	Lake 1 Yasavei, Russia	Russia	Small lake and Pond	13	2.55736	1	67.35	78.91	13			2.5	D		124.6	B			Golubyatnikov and Kazantsev 2013	Johnson et al 2022	Golubyatnikov, L. L., & Kazantsev, V. S. (2013). Contribution of tundra lakes in Western Siberia to the atmospheric methane budget. Izvestiya - Atmospheric and Oceanic Physics, 49(4), 395–403.
271	Lake 2 Gyda, Russia	Russia	Small lake and Pond	5.8	1.14098	1	70.54	78.32	5.8			2.5	D		124.6	B			Golubyatnikov and Kazantsev 2013	Johnson et al 2022	Golubyatnikov, L. L., & Kazantsev, V. S. (2013). Contribution of tundra lakes in Western Siberia to the atmospheric methane budget. Izvestiya - Atmospheric and Oceanic Physics, 49(4), 395–403.
272	Lake 2 Tazovskii, Russia	Russia	Small lake and Pond	59.3	11.6655	1	67.11	78.55	59.3			3	D		124.6	TH			Golubyatnikov and Kazantsev 2013	Johnson et al 2022	Golubyatnikov, L. L., & Kazantsev, V. S. (2013). Contribution of tundra lakes in Western Siberia to the atmospheric methane budget. Izvestiya - Atmospheric and Oceanic Physics, 49(4), 395–403.
273	Lake 2 Yasavei, Russia	Russia	Small lake and Pond	13.2	2.5967	1	67.35	78.91	13.2			2.5	D		124.6	B			Golubyatnikov and Kazantsev 2013	Johnson et al 2022	Golubyatnikov, L. L., & Kazantsev, V. S. (2013). Contribution of tundra lakes in Western Siberia to the atmospheric methane budget. Izvestiya - Atmospheric and Oceanic Physics, 49(4), 395–403.
375	Peatland pool 3, Canada	Canada	Small lake and Pond	104.3	27.045	1	49.08	-68.17	104.3		0.0008	0.4	D		214	PP			Pelletier et al. 2014	Johnson et al 2022	Pelletier, L., Strachan, I. B., Garneau, M., & Roulet, N. T. (2014). Carbon release from Boreal peatland open water pools: Implication for the contemporary C exchange. Journal of Geophysical Research: Biogeosciences, 119, 207–222.
275	Lake 3 Gyda, Russia	Russia	Small lake and Pond	8.9	1.75081	1	70.54	78.32	8.9			2.5	D		124.6	B			Golubyatnikov and Kazantsev 2013	Johnson et al 2022	Golubyatnikov, L. L., & Kazantsev, V. S. (2013). Contribution of tundra lakes in Western Siberia to the atmospheric methane budget. Izvestiya - Atmospheric and Oceanic Physics, 49(4), 395–403.
276	Lake 3 Tazovskii, Russia	Russia	Small lake and Pond	25.2	4.95734	1	67.11	78.55	25.2			3	D		124.6	TH			Golubyatnikov and Kazantsev 2013	Johnson et al 2022	Golubyatnikov, L. L., & Kazantsev, V. S. (2013). Contribution of tundra lakes in Western Siberia to the atmospheric methane budget. Izvestiya - Atmospheric and Oceanic Physics, 49(4), 395–403.
277	Lake 3 Yasavei, Russia	Russia	Small lake and Pond	6.7	1.31802	1	67.35	78.91	6.7			2.5	D		124.6	B			Golubyatnikov and Kazantsev 2013	Johnson et al 2022	Golubyatnikov, L. L., & Kazantsev, V. S. (2013). Contribution of tundra lakes in Western Siberia to the atmospheric methane budget. Izvestiya - Atmospheric and Oceanic Physics, 49(4), 395–403.
278	Lake 4 Gyda, Russia	Russia	Small lake and Pond	12	2.36064	1	70.54	78.32	12			2.5	D		124.6	B			Golubyatnikov and Kazantsev 2013	Johnson et al 2022	Golubyatnikov, L. L., & Kazantsev, V. S. (2013). Contribution of tundra lakes in Western Siberia to the atmospheric methane budget. Izvestiya - Atmospheric and Oceanic Physics, 49(4), 395–403.
279	Lake 4 Tazovskii, Russia	Russia	Small lake and Pond	18	3.54096	1	67.11	78.55	18			3	D		124.6	TH			Golubyatnikov and Kazantsev 2013	Johnson et al 2022	Golubyatnikov, L. L., & Kazantsev, V. S. (2013). Contribution of tundra lakes in Western Siberia to the atmospheric methane budget. Izvestiya - Atmospheric and Oceanic Physics, 49(4), 395–403.
280	Lake 4 Yasavei, Russia	Russia	Small lake and Pond	6.5	1.27868	1	67.35	78.91	6.5			2.5	D		124.6	B			Golubyatnikov and Kazantsev 2013	Johnson et al 2022	Golubyatnikov, L. L., & Kazantsev, V. S. (2013). Contribution of tundra lakes in Western Siberia to the atmospheric methane budget. Izvestiya - Atmospheric and Oceanic Physics, 49(4), 395–403.
281	Lake 5 Gyda, Russia	Russia	Small lake and Pond	7.9	1.55409	1	70.54	78.32	7.9			2.5	D		124.6	B			Golubyatnikov and Kazantsev 2013	Johnson et al 2022	Golubyatnikov, L. L., & Kazantsev, V. S. (2013). Contribution of tundra lakes in Western Siberia to the atmospheric methane budget. Izvestiya - Atmospheric and Oceanic Physics, 49(4), 395–403.
282	Lake 5 Tazovskii, Russia	Russia	Small lake and Pond	17.3	3.40326	1	67.11	78.55	17.3			3	D		124.6	TH			Golubyatnikov and Kazantsev 2013	Johnson et al 2022	Golubyatnikov, L. L., & Kazantsev, V. S. (2013). Contribution of tundra lakes in Western Siberia to the atmospheric methane budget. Izvestiya - Atmospheric and Oceanic Physics, 49(4), 395–403.
283	Lake 5 Yasavei, Russia	Russia	Small lake and Pond	12.5	2.459	1	67.35	78.91	12.5			2.5	D		124.6	B			Golubyatnikov and Kazantsev 2013	Johnson et al 2022	Golubyatnikov, L. L., & Kazantsev, V. S. (2013). Contribution of tundra lakes in Western Siberia to the atmospheric methane budget. Izvestiya - Atmospheric and Oceanic Physics, 49(4), 395–403.
284	Lake 6 Tazovskii, Russia	Russia	Small lake and Pond	19.4	3.81637	1	67.11	78.55	19.4			3	D		124.6	TH			Golubyatnikov and Kazantsev 2013	Johnson et al 2022	Golubyatnikov, L. L., & Kazantsev, V. S. (2013). Contribution of tundra lakes in Western Siberia to the atmospheric methane budget. Izvestiya - Atmospheric and Oceanic Physics, 49(4), 395–403.
285	Lake Alford, Australia	Australia	Small lake and Pond	49.0816	17.9148	1	-26.2152	152.685	49.0816		0.021689		D		365	TR		Mesotrophic	Grinham et al 2018	Rosentreter et al., 2021	Grinham, A. et al. The importance of small artificial water bodies as sources of methane emissions in Queensland, Australia. Hydrology and Earth System Sciences Discussions 1–27 (2018). doi:10.5194/hess-2018-294
286	Lake L06:L09,Russia	Russia	Small lake and Pond	20.6667	4.16681	1	70.83	147.49	20.6667		0.13		D		131.6	PP			Dean et al. 2020	Kuhn et al., 2021	https://doi.org/10.1038/s41467-020-15511-6
287	Lake L10:L12,Russia	Russia	Small lake and Pond	16	3.22592	1	70.83	147.49	16		0.11		D		131.6	PP			Dean et al. 2020	Kuhn et al., 2021	https://doi.org/10.1038/s41467-020-15511-6
376	Peatland pool 4, Canada	Canada	Small lake and Pond	21.4	5.54902	1	49.08	-68.17	21.4		0.0026	1.9	D		214	PP			Pelletier et al. 2014	Johnson et al 2022	Pelletier, L., Strachan, I. B., Garneau, M., & Roulet, N. T. (2014). Carbon release from Boreal peatland open water pools: Implication for the contemporary C exchange. Journal of Geophysical Research: Biogeosciences, 119, 207–222.
377	Peatland pool 5, Canada	Canada	Small lake and Pond	5.3	1.37429	1	49.08	-68.17	5.3		0.0019	1.9	D		214	PP			Pelletier et al. 2014	Johnson et al 2022	Pelletier, L., Strachan, I. B., Garneau, M., & Roulet, N. T. (2014). Carbon release from Boreal peatland open water pools: Implication for the contemporary C exchange. Journal of Geophysical Research: Biogeosciences, 119, 207–222.
149	Goose Lake, United States of America	United States of America	Small lake and Pond	20	4.57	1	61.12	-149.49	20				D		170	GP			Phelps et al. 1998	Johnson et al 2022	Phelps, A. R., Peterson, K. M., & Jeffries, M. O. (1998). Methane efflux from high-latitude lakes during spring ice melt. Journal of Geophysical Research: Atmospheres, 103(D22), 29 029–29 036.
131	FTLake, Russia	Russia	Small lake and Pond	8.71	1.86708	1	65.52	74.58	6.1	2.61	0.07		DE		149.8	TH		Eutrophic	Repo et al. 2007	Johnson et al 2022	Repo, M. E., Huttunen, J. T., Naumov, A. V., Chichulin, A. V., Lapshina, E. D., Bleuten, W., & Martikainen, P. J. (2007). Release of CO2 and CH4 from small wetland lakes in Western Siberia. Tellus B: Chemical and Physical Meteorology, 59(5), 788–796.
315	MTPond, Russia	Russia	Small lake and Pond	41	8.59934	1	60.59	70.1	41	0	0.005		DE		143.2	B		Eutrophic	Repo et al. 2007	Johnson et al 2022	Repo, M. E., Huttunen, J. T., Naumov, A. V., Chichulin, A. V., Lapshina, E. D., Bleuten, W., & Martikainen, P. J. (2007). Release of CO2 and CH4 from small wetland lakes in Western Siberia. Tellus B: Chemical and Physical Meteorology, 59(5), 788–796.
100	Crystal Bog, United States of America	United States of America	Small lake and Pond	19.84	5.2945	1	45.872	-91.709	19.84				D		224.8	T			Riera et al., 1999	Johnson et al 2022	Riera, J. L., Schindler, J. E., & Kratz, T. K. (1999). Seasonal dynamics of carbon dioxide and methane in two clear-water lakes and two bog lakes in Northern Wisconsin, U.S.A. Canadian Journal of Fisheries and Aquatic Sciences, 56(2), 265–274.
466	Trout Bog, United States of America	United States of America	Small lake and Pond	27.36	7.46217	1	44.245	-87.919	27.36				D		233.2	T			Riera et al., 1999	Johnson et al 2022	Riera, J. L., Schindler, J. E., & Kratz, T. K. (1999). Seasonal dynamics of carbon dioxide and methane in two clear-water lakes and two bog lakes in Northern Wisconsin, U.S.A. Canadian Journal of Fisheries and Aquatic Sciences, 56(2), 265–274.
295	Large lakes, United States of America	United States of America	Small lake and Pond	3.8	0.890644	1	60.46	-161.45	3.8				D		178.4	TH			Bartlett et al. 1992	Johnson et al 2022	Bartlett, K. B., Crill, P. M., Sass, R. L., Harriss, R. C., & Dise, N. B. (1992). Methane emissions from tundra environments in the Yukon-Kuskokwim delta, Alaska. Journal of Geophysical Research, 97, 16645–16660.
105	De Waay, Netherlands	Netherlands	Small lake and Pond	22.2956	8.13789	1	51.93	5.15	10.7468	11.5488	0.04	15	DE		365	T			Rinta et al., 2016	Johnson et al 2022	Rinta, P., van Hardenbroek, M., Jones, R. I., Kankaala, P., Rey, F., Szidat, S., Wooller, M. J., & Heiri, O. (2016). Land use affects carbon sources to the pelagic food web in a small boreal lake. PLOS ONE, 11(8), e0159900.
297	Lebedinoe,Russia	Russia	Small lake and Pond	4.8	1.00675	1	60.9	69.65	4.8	0	0.078	2.5	DE		143.2	PP			Sabrekov et al. 2017	Kuhn et al., 2021	https://doi.org/10.5194/bg-14-3715-2017
118	Egelsee, Switzerland	Switzerland	Small lake and Pond	109.232	39.8698	1	47.4	8.36	50.8468	58.3856	0.02	11	DE		365	T			Rinta et al., 2016	Johnson et al 2022	Rinta, P., van Hardenbroek, M., Jones, R. I., Kankaala, P., Rey, F., Szidat, S., Wooller, M. J., & Heiri, O. (2016). Land use affects carbon sources to the pelagic food web in a small boreal lake. PLOS ONE, 11(8), e0159900.
139	Gantrischseeli, Switzerland	Switzerland	Small lake and Pond	50.0448	18.2664	1	46.71	7.44	7.5388	42.506	0.01	1	DE		365	T			Rinta et al., 2016	Johnson et al 2022	Rinta, P., van Hardenbroek, M., Jones, R. I., Kankaala, P., Rey, F., Szidat, S., Wooller, M. J., & Heiri, O. (2016). Land use affects carbon sources to the pelagic food web in a small boreal lake. PLOS ONE, 11(8), e0159900.
157	Hasensee, Switzerland	Switzerland	Small lake and Pond	284.229	103.744	1	47.61	8.83	136.661	147.568	0.07	6	DE		365	T			Rinta et al., 2016	Johnson et al 2022	Rinta, P., van Hardenbroek, M., Jones, R. I., Kankaala, P., Rey, F., Szidat, S., Wooller, M. J., & Heiri, O. (2016). Land use affects carbon sources to the pelagic food web in a small boreal lake. PLOS ONE, 11(8), e0159900.
158	Hijkermeer, Netherlands	Netherlands	Small lake and Pond	357.371	130.44	1	52.89	6.49	11.7092	345.662	0.02	2	DE		365	T			Rinta et al., 2016	Johnson et al 2022	Rinta, P., van Hardenbroek, M., Jones, R. I., Kankaala, P., Rey, F., Szidat, S., Wooller, M. J., & Heiri, O. (2016). Land use affects carbon sources to the pelagic food web in a small boreal lake. PLOS ONE, 11(8), e0159900.
159	Hinterburgsee, Switzerland	Switzerland	Small lake and Pond	69.2928	25.2919	1	46.72	8.07	45.2328	24.06	0.05	11	DE		365	B			Rinta et al., 2016	Johnson et al 2022	Rinta, P., van Hardenbroek, M., Jones, R. I., Kankaala, P., Rey, F., Szidat, S., Wooller, M. J., & Heiri, O. (2016). Land use affects carbon sources to the pelagic food web in a small boreal lake. PLOS ONE, 11(8), e0159900.
162	Husemersee, Switzerland	Switzerland	Small lake and Pond	85.3328	31.1465	1	47.62	8.7	46.6764	38.6564	0.07	14	DE		365	T			Rinta et al., 2016	Johnson et al 2022	Rinta, P., van Hardenbroek, M., Jones, R. I., Kankaala, P., Rey, F., Szidat, S., Wooller, M. J., & Heiri, O. (2016). Land use affects carbon sources to the pelagic food web in a small boreal lake. PLOS ONE, 11(8), e0159900.
304	LittleOctopus, United States of America	United States of America	Small lake and Pond	243.53	NA	1	64.907	-147.859		243.53	0.0082		E	Yes	NA	T			Engram et al. 2020	Kuhn et al., 2021	https://doi.org/10.1038/s41558-020-0762-8
305	Lobo, Brazil	Brazil	Small lake and Pond	84.8762	30.9798	1	-18.953	-57.625	28.4457	56.4305			DE		365	TR			Bastviken et al., 2010	Johnson et al 2022	Bastviken, D., Tranvik, L. J., Downing, J. A., Crill, P. M., & Enrich-Prast, A. (2011). Freshwater methane emissions offset the continental carbon sink. Science, 331, 50–51. https://doi.org/10.1126/science.1196808
164	Illersjön, Sweden	Sweden	Small lake and Pond	4.01	1.4193	1	58.58	14.99	1.4436	2.5664	0.0545	12	DE		349.2	T			Rinta et al., 2016	Johnson et al 2022	Rinta, P., van Hardenbroek, M., Jones, R. I., Kankaala, P., Rey, F., Szidat, S., Wooller, M. J., & Heiri, O. (2016). Land use affects carbon sources to the pelagic food web in a small boreal lake. PLOS ONE, 11(8), e0159900.
259	Lac Noir, Switzerland	Switzerland	Small lake and Pond	122.385	44.6706	1	46.33	7.08	70.2552	52.13	0.01	11	DE		365	T			Rinta et al., 2016	Johnson et al 2022	Rinta, P., van Hardenbroek, M., Jones, R. I., Kankaala, P., Rey, F., Szidat, S., Wooller, M. J., & Heiri, O. (2016). Land use affects carbon sources to the pelagic food web in a small boreal lake. PLOS ONE, 11(8), e0159900.
308	M11, Canada, Canada	Canada	Small lake and Pond	32.3016	NA	1	50.5244	-63.2066					E	Yes	NA	PP	Ombrotrophic peatland/Bog		Taillardat et al., 2024	Taillardat et al., 2024	Taillardat, P., Linkhorst, A., Deblois, C. P., Prijac, A., Gandois, L., Tremblay, A., & Garneau, M. (2024). A Carbon Source in a Carbon Sink: Carbon Dioxide and Methane Dynamics in Open‐Water Peatland Pools. Global Biogeochemical Cycles, 38(4), e2023GB007909.
309	M12, Canada, Canada	Canada	Small lake and Pond	16.2843	NA	1	50.5239	-63.2061					E	Yes	NA	PP	Ombrotrophic peatland/Bog		Taillardat et al., 2024	Taillardat et al., 2024	Taillardat, P., Linkhorst, A., Deblois, C. P., Prijac, A., Gandois, L., Tremblay, A., & Garneau, M. (2024). A Carbon Source in a Carbon Sink: Carbon Dioxide and Methane Dynamics in Open‐Water Peatland Pools. Global Biogeochemical Cycles, 38(4), e2023GB007909.
310	M13, Canada , Canada	Canada	Small lake and Pond	36.4394	8.38762	1	50.5239	-63.2056					D		172.4	PP	Ombrotrophic peatland/Bog		Taillardat et al., 2024	Taillardat et al., 2024	Taillardat, P., Linkhorst, A., Deblois, C. P., Prijac, A., Gandois, L., Tremblay, A., & Garneau, M. (2024). A Carbon Source in a Carbon Sink: Carbon Dioxide and Methane Dynamics in Open‐Water Peatland Pools. Global Biogeochemical Cycles, 38(4), e2023GB007909.
311	M14, Canada, Canada	Canada	Small lake and Pond	26.2951	6.0526	1	50.5242	-63.2053					D		172.4	PP	Ombrotrophic peatland/Bog		Taillardat et al., 2024	Taillardat et al., 2024	Taillardat, P., Linkhorst, A., Deblois, C. P., Prijac, A., Gandois, L., Tremblay, A., & Garneau, M. (2024). A Carbon Source in a Carbon Sink: Carbon Dioxide and Methane Dynamics in Open‐Water Peatland Pools. Global Biogeochemical Cycles, 38(4), e2023GB007909.
312	M15, Canada, Canada	Canada	Small lake and Pond	145.357	33.4583	1	50.5244	-63.205					D		172.4	PP	Ombrotrophic peatland/Bog		Taillardat et al., 2024	Taillardat et al., 2024	Taillardat, P., Linkhorst, A., Deblois, C. P., Prijac, A., Gandois, L., Tremblay, A., & Garneau, M. (2024). A Carbon Source in a Carbon Sink: Carbon Dioxide and Methane Dynamics in Open‐Water Peatland Pools. Global Biogeochemical Cycles, 38(4), e2023GB007909.
260	Lac d'Ai, Switzerland	Switzerland	Small lake and Pond	271.236	99.0013	1	46.36	7.01	98.4856	172.751	0.01	2	DE		365	T			Rinta et al., 2016	Johnson et al 2022	Rinta, P., van Hardenbroek, M., Jones, R. I., Kankaala, P., Rey, F., Szidat, S., Wooller, M. J., & Heiri, O. (2016). Land use affects carbon sources to the pelagic food web in a small boreal lake. PLOS ONE, 11(8), e0159900.
261	Lac de Bretaye, Switzerland	Switzerland	Small lake and Pond	40.7416	14.8707	1	46.33	7.07	26.6264	14.1152	0.04	9	DE		365	T			Rinta et al., 2016	Johnson et al 2022	Rinta, P., van Hardenbroek, M., Jones, R. I., Kankaala, P., Rey, F., Szidat, S., Wooller, M. J., & Heiri, O. (2016). Land use affects carbon sources to the pelagic food web in a small boreal lake. PLOS ONE, 11(8), e0159900.
262	Lac de Derborence, Switzerland	Switzerland	Small lake and Pond	10.5864	3.86404	1	46.28	7.22	2.5664	8.02	0.04	2	DE		365	T			Rinta et al., 2016	Johnson et al 2022	Rinta, P., van Hardenbroek, M., Jones, R. I., Kankaala, P., Rey, F., Szidat, S., Wooller, M. J., & Heiri, O. (2016). Land use affects carbon sources to the pelagic food web in a small boreal lake. PLOS ONE, 11(8), e0159900.
263	Lac de Retaud, Switzerland	Switzerland	Small lake and Pond	774.892	282.836	1	46.36	7.2	46.8368	728.056	0.01	5	DE		365	T			Rinta et al., 2016	Johnson et al 2022	Rinta, P., van Hardenbroek, M., Jones, R. I., Kankaala, P., Rey, F., Szidat, S., Wooller, M. J., & Heiri, O. (2016). Land use affects carbon sources to the pelagic food web in a small boreal lake. PLOS ONE, 11(8), e0159900.
264	Lac des Chavonnes, Switzerland	Switzerland	Small lake and Pond	1.604	0.58546	1	46.33	7.09	0.9624	0.6416	0.05	28	DE		365	T			Rinta et al., 2016	Johnson et al 2022	Rinta, P., van Hardenbroek, M., Jones, R. I., Kankaala, P., Rey, F., Szidat, S., Wooller, M. J., & Heiri, O. (2016). Land use affects carbon sources to the pelagic food web in a small boreal lake. PLOS ONE, 11(8), e0159900.
318	Marrecao, Brazil	Brazil	Small lake and Pond	7.6	2.774	1	-3.369	-60.725	7.6	0			DE		365	TR			Bartlett et al., 1988	Johnson et al 2022	Bartlett, K. B., Crill, P. M., Sebacher, D. I., Harriss, R. C., Wilson, J. O., & Melack, J. M. (1988). Methane flux from the central Amazonian
319	Medalha, Brazil	Brazil	Small lake and Pond	154	56.21	1	-19.567	-57.017	6	148			DE		365	TR			Marani and Alvalá, 2007	Johnson et al 2022	Marani, L., & Alvala, P. C. (2007). Methane emissions from lakes and floodplains in Pantanal, Brazil. Atmospheric Environment, 41, 1627–1633.
296	Lauenensee, Switzerland	Switzerland	Small lake and Pond	42.3456	15.4561	1	46.4	7.33	36.5712	5.7744	0.09	4	DE		365	T			Rinta et al., 2016	Johnson et al 2022	Rinta, P., van Hardenbroek, M., Jones, R. I., Kankaala, P., Rey, F., Szidat, S., Wooller, M. J., & Heiri, O. (2016). Land use affects carbon sources to the pelagic food web in a small boreal lake. PLOS ONE, 11(8), e0159900.
299	Lillsjön, Sweden	Sweden	Small lake and Pond	1.2832	0.454176	1	58.66	16.14	0.9624	0.3208	0.025	7.5	DE		349.2	T			Rinta et al., 2016	Johnson et al 2022	Rinta, P., van Hardenbroek, M., Jones, R. I., Kankaala, P., Rey, F., Szidat, S., Wooller, M. J., & Heiri, O. (2016). Land use affects carbon sources to the pelagic food web in a small boreal lake. PLOS ONE, 11(8), e0159900.
322	Mellersta Harrsjön, Sweden	Sweden	Small lake and Pond	21.4833	4.80367	1	68.3585	19.0424	8	17.4833	0.0105	6.7	DE		163	T			Jansen et al. 2020; Wik et al. 2013	Kuhn et al., 2021; Johnson et al 2022	NA
323	Mirante, Brazil	Brazil	Small lake and Pond	89	32.485	1	-19.567	-57.017	7	82			DE		365	TR			Marani and Alvalá, 2007	Johnson et al 2022	Marani, L., & Alvala, P. C. (2007). Methane emissions from lakes and floodplains in Pantanal, Brazil. Atmospheric Environment, 41, 1627–1633.
324	Mirror Lake, United States of America	United States of America	Small lake and Pond	1.452	0.52998	1	27.649	-82.655	1.452				D		365	T			Barber et al., 1988	Johnson et al 2022	Barber, T. R., Burke, R. A., & Sackett, W. M. (1988). Diffusive flux of methane from warm wetlands. Global Biogeochemical Cycles, 2, 411–425.
306	Lovojärvi, Finland	Finland	Small lake and Pond	17.9648	4.70354	1	61.08	25.03	4.9724	12.9924	0.05	18	DE		217.6	T			Rinta et al., 2016	Johnson et al 2022	Rinta, P., van Hardenbroek, M., Jones, R. I., Kankaala, P., Rey, F., Szidat, S., Wooller, M. J., & Heiri, O. (2016). Land use affects carbon sources to the pelagic food web in a small boreal lake. PLOS ONE, 11(8), e0159900.
321	Mekkojärvi, Finland	Finland	Small lake and Pond	9.9448	2.61906	1	61.23	25.14	6.5764	3.3684	0.003	4	DE		219.8	T			Rinta et al., 2016	Johnson et al 2022	Rinta, P., van Hardenbroek, M., Jones, R. I., Kankaala, P., Rey, F., Szidat, S., Wooller, M. J., & Heiri, O. (2016). Land use affects carbon sources to the pelagic food web in a small boreal lake. PLOS ONE, 11(8), e0159900.
347	Nimetön, Finland	Finland	Small lake and Pond	4.6516	1.22505	1	61.23	25.19	0.6416	4.01	0.004	13	DE		219.8	T			Rinta et al., 2016	Johnson et al 2022	Rinta, P., van Hardenbroek, M., Jones, R. I., Kankaala, P., Rey, F., Szidat, S., Wooller, M. J., & Heiri, O. (2016). Land use affects carbon sources to the pelagic food web in a small boreal lake. PLOS ONE, 11(8), e0159900.
328	Monasta A37, United States of America	United States of America	Small lake and Pond	27.152	NA	1	64.77	-148.28		27.152			E	Yes	NA	NA			Sepulveda-Jauregui et al. 2015	Johnson et al 2022	Sepulveda-Jauregui A, Walter Anthony KM, Martinez-Cruz K et al. (2015) Methane and carbon dioxide emissions from 40 lakes along a north-south latitudinal transect in Alaska. Biogeosciences, 12, 3197-3223
428	Schwendisee, Switzerland	Switzerland	Small lake and Pond	45.714	16.6856	1	47.19	9.33	43.1476	2.5664	0.03	10	DE		365	T			Rinta et al., 2016	Johnson et al 2022	Rinta, P., van Hardenbroek, M., Jones, R. I., Kankaala, P., Rey, F., Szidat, S., Wooller, M. J., & Heiri, O. (2016). Land use affects carbon sources to the pelagic food web in a small boreal lake. PLOS ONE, 11(8), e0159900.
330	Mountain Region, United States of America	United States of America	Small lake and Pond	5.259	1.07284	9	68.462	-149.39	5.259		0.595286		D		135	GP			Sasaki et al. 2016	Kuhn et al., 2021	https://doi.org/10.1016/j.polar.2016.06.010
331	Mrazek Pond, United States of America	United States of America	Small lake and Pond	0.082	0.02993	1	25.186	-80.894	0.082				D		365	TR			Barber et al., 1988	Johnson et al 2022	Barber, T. R., Burke, R. A., & Sackett, W. M. (1988). Diffusive flux of methane from warm wetlands. Global Biogeochemical Cycles, 2, 411–425.
332	Mt Coot-tha, Australia	Australia	Small lake and Pond	2497.15	911.46	1	-27.4763	152.964	2497.15		0.00058		D		365	TR		Mesotrophic	Grinham et al 2018	Rosentreter et al., 2021	Grinham, A. et al. The importance of small artificial water bodies as sources of methane emissions in Queensland, Australia. Hydrology and Earth System Sciences Discussions 1–27 (2018). doi:10.5194/hess-2018-294
333	Mt Larcom 1, Australia	Australia	Small lake and Pond	574.956	209.859	1	-23.8008	150.956	574.956		0.005025		D		365	TR		Eutrophic	Grinham et al 2018	Rosentreter et al., 2021	Grinham, A. et al. The importance of small artificial water bodies as sources of methane emissions in Queensland, Australia. Hydrology and Earth System Sciences Discussions 1–27 (2018). doi:10.5194/hess-2018-294
334	Mt Larcom 2, Australia	Australia	Small lake and Pond	48.0799	17.5492	1	-23.806	150.957	48.0799		0.001256		D		365	TR		Mesotrophic	Grinham et al 2018	Rosentreter et al., 2021	Grinham, A. et al. The importance of small artificial water bodies as sources of methane emissions in Queensland, Australia. Hydrology and Earth System Sciences Discussions 1–27 (2018). doi:10.5194/hess-2018-294
335	Mt Larcom 3, Australia	Australia	Small lake and Pond	17.0283	6.21533	1	-23.8015	150.945	17.0283		0.016093		D		365	TR		Mesotrophic	Grinham et al 2018	Rosentreter et al., 2021	Grinham, A. et al. The importance of small artificial water bodies as sources of methane emissions in Queensland, Australia. Hydrology and Earth System Sciences Discussions 1–27 (2018). doi:10.5194/hess-2018-294
336	Muhrino,Russia	Russia	Small lake and Pond	5.04	1.05709	1	60.9	69.65	4.8	0.24	5.364	1.5	DE		143.2	PP			Sabrekov et al. 2017	Kuhn et al., 2021	https://doi.org/10.5194/bg-14-3715-2017
431	Seebergsee, Switzerland	Switzerland	Small lake and Pond	103.618	37.8207	1	46.58	7.44	103.618	0	0.06	15	DE		365	T			Rinta et al., 2016	Johnson et al 2022	Rinta, P., van Hardenbroek, M., Jones, R. I., Kankaala, P., Rey, F., Szidat, S., Wooller, M. J., & Heiri, O. (2016). Land use affects carbon sources to the pelagic food web in a small boreal lake. PLOS ONE, 11(8), e0159900.
338	N14, Brazil	Brazil	Small lake and Pond	330.894	120.776	1	-18.995	-56.656	6.2683	324.626			DE		365	TR			Bastviken et al., 2010	Johnson et al 2022	Bastviken, D., Tranvik, L. J., Downing, J. A., Crill, P. M., & Enrich-Prast, A. (2011). Freshwater methane emissions offset the continental carbon sink. Science, 331, 50–51. https://doi.org/10.1126/science.1196808
339	N19a, Brazil	Brazil	Small lake and Pond	215.25	78.5664	1	-19.004	-56.632	11.6508	203.6			DE		365	TR			Bastviken et al., 2010	Johnson et al 2022	Bastviken, D., Tranvik, L. J., Downing, J. A., Crill, P. M., & Enrich-Prast, A. (2011). Freshwater methane emissions offset the continental carbon sink. Science, 331, 50–51. https://doi.org/10.1126/science.1196808
340	N2, United States of America	United States of America	Small lake and Pond	9.485	NA	1	69.3855	-149.454		9.485	1e-05		E	Yes	NA	GP			Engram et al. 2020; Walter Anthony et al. 2010	Kuhn et al., 2021; Johnson et al 2022	https://doi.org/10.1038/s41558-020-0762-8; Walter Anthony, K. M., Vas, D. A., Brosius, L., Chapin, F. S., Zimov, S. A., & Zhuang, Q. (2010). Estimating methane emissions from northern lakes using ice-bubble surveys. Limnology and Oceanography: Methods, 8(11), 592–609.
341	N3, United States of America	United States of America	Small lake and Pond	47.89	NA	1	69.386	-149.456		47.89	1e-05		E	Yes	NA	GP			Engram et al. 2020; Walter Anthony et al. 2010	Kuhn et al., 2021; Johnson et al 2022	https://doi.org/10.1038/s41558-020-0762-8; Walter Anthony, K. M., Vas, D. A., Brosius, L., Chapin, F. S., Zimov, S. A., & Zhuang, Q. (2010). Estimating methane emissions from northern lakes using ice-bubble surveys. Limnology and Oceanography: Methods, 8(11), 592–609.
342	NAKK P1, India	India	Small lake and Pond	26.88	9.8112	1	8.122	77.501	26.88				D		365	TR			Selvam et al., 2014	this study	Selvam BP, Natchimuthu S, Arunachalam L et al. (2014) Methane and carbon dioxide emissions from inland waters in India-implications for large scale greenhouse gas balances. Global Change Biology, 20, 3397-3407.
455	Syrjänalunen, Finland	Finland	Small lake and Pond	10.7468	2.83028	1	61.19	25.14	8.6616	2.0852	0.01	9	DE		219.8	T			Rinta et al., 2016	Johnson et al 2022	Rinta, P., van Hardenbroek, M., Jones, R. I., Kankaala, P., Rey, F., Szidat, S., Wooller, M. J., & Heiri, O. (2016). Land use affects carbon sources to the pelagic food web in a small boreal lake. PLOS ONE, 11(8), e0159900.
344	NE2_bigLake, United States of America	United States of America	Small lake and Pond	6.85	NA	1	68.646	-149.583		6.85	0.0618	2.7	E	Yes	NA	GP			Engram et al. 2020	Kuhn et al., 2021	https://doi.org/10.1038/s41558-020-0762-8
345	NKMK P1, India	India	Small lake and Pond	492.8	179.872	1	8.116	77.526	325.28	167.52			DE		365	TR			Selvam et al., 2014	this study	Selvam BP, Natchimuthu S, Arunachalam L et al. (2014) Methane and carbon dioxide emissions from inland waters in India-implications for large scale greenhouse gas balances. Global Change Biology, 20, 3397-3407.
346	Nemmeli Lake, India	India	Small lake and Pond	7.52	2.7448	1	12.664	80.03	3.2	4.32			DE		365	TR			Selvam et al., 2014	this study	Selvam BP, Natchimuthu S, Arunachalam L et al. (2014) Methane and carbon dioxide emissions from inland waters in India-implications for large scale greenhouse gas balances. Global Change Biology, 20, 3397-3407.
107	Dendre, Belgium	Belgium	Small lake and Pond	58.8628	21.4849	4	50.616	3.795	58.8628				D		365	T			Roland et al., 2017	Johnson et al 2022	Roland, F. A. E., Darchambeau, F., Morana, C., & Borges, A. V. (2017). Nitrous oxide and methane seasonal variability in the epilimnion of a
348	Nutella, United States of America	United States of America	Small lake and Pond	9.231	2.16356	1	63.22	-147.68	8.462	0.769			DE		178.4	GP			Sepulveda-Jauregui et al. 2015	Johnson et al 2022	large tropical meromictic lake (Lake Kivu, East-Africa). Aquatic Sciences, 79(2), 209–218
349	OGradyGravelPit, United States of America	United States of America	Small lake and Pond	0.94	NA	1	64.846	-147.802		0.94	0.0612		E	Yes	NA	GP			Engram et al. 2020	Kuhn et al., 2021	https://doi.org/10.1038/s41558-020-0762-8
350	Ob��� Floodpla,Russia	Russia	Small lake and Pond	211.2	49.2941	1	56.8	82.75	211.2		0.045	1.7	D		177	PP			Sabrekov et al. 2017	Kuhn et al., 2021	https://doi.org/10.5194/bg-14-3715-2017
351	OctopusNorth, United States of America	United States of America	Small lake and Pond	113.79	NA	1	64.908	-147.861		113.79	0.0138	3.1	E	Yes	NA	T			Engram et al. 2020	Kuhn et al., 2021	https://doi.org/10.1038/s41558-020-0762-8
352	OctopusSouth, United States of America	United States of America	Small lake and Pond	266.78	NA	1	64.908	-147.861		266.78	0.008	3.3	E	Yes	NA	T			Engram et al. 2020	Kuhn et al., 2021	https://doi.org/10.1038/s41558-020-0762-8
96	Coastal Pond, Canada	Canada	Small lake and Pond	103.55	22.7189	1	58.45	-94.09	103.55				D		157	B			Rouse et al. 1995	Johnson et al 2022	Rouse, W. R., Holland, S., & Moore, T. R. (1995). Variability in methane emissions from wetlands at Northern treeline near Churchill, Manitoba,Canada. Arctic Antarctic and Alpine Research, 27(2), 146–156.
354	Oxenford, Australia	Australia	Small lake and Pond	97.1615	35.464	1	-27.8924	153.3	97.1615		0.036938		D		365	TR		Eutrophic	Grinham et al 2018	Rosentreter et al., 2021	Canada. Arctic Antarctic and Alpine Research, 27(2), 146–156.
355	P01,Russia	Russia	Small lake and Pond	9.33333	1.88179	1	70.83	147.49	9.33333		0.0001		D		131.6	PP			Dean et al. 2020	Kuhn et al., 2021	https://doi.org/10.1038/s41467-020-15511-6
356	P02,Russia	Russia	Small lake and Pond	4	0.80648	1	70.83	147.49	4		0.0001		D		131.6	PP			Dean et al. 2020	Kuhn et al., 2021	https://doi.org/10.1038/s41467-020-15511-6
357	P03,Russia	Russia	Small lake and Pond	4	0.80648	1	70.83	147.49	4		0.0001		D		131.6	PP			Dean et al. 2020	Kuhn et al., 2021	https://doi.org/10.1038/s41467-020-15511-6
358	P05,Russia	Russia	Small lake and Pond	16.4444	3.31553	1	70.83	147.49	16.4444		0.0001		D		131.6	PP			Dean et al. 2020	Kuhn et al., 2021	https://doi.org/10.1038/s41467-020-15511-6
359	P06,Russia	Russia	Small lake and Pond	136.444	27.5099	1	70.83	147.49	136.444		0.0001		D		131.6	PP			Dean et al. 2020	Kuhn et al., 2021	https://doi.org/10.1038/s41467-020-15511-6
360	P07,Russia	Russia	Small lake and Pond	11.5556	2.32983	1	70.83	147.49	11.5556		0.0001		D		131.6	PP			Dean et al. 2020	Kuhn et al., 2021	https://doi.org/10.1038/s41467-020-15511-6
361	P08,Russia	Russia	Small lake and Pond	8.88889	1.79218	1	70.83	147.49	8.88889		0.0001		D		131.6	PP			Dean et al. 2020	Kuhn et al., 2021	https://doi.org/10.1038/s41467-020-15511-6
362	P09,Russia	Russia	Small lake and Pond	10.6667	2.15061	1	70.83	147.49	10.6667		0.0001		D		131.6	PP			Dean et al. 2020	Kuhn et al., 2021	https://doi.org/10.1038/s41467-020-15511-6
363	P10,Russia	Russia	Small lake and Pond	54.6667	11.0219	1	70.83	147.49	54.6667		0.0001		D		131.6	PP			Dean et al. 2020	Kuhn et al., 2021	https://doi.org/10.1038/s41467-020-15511-6
364	P11,Russia	Russia	Small lake and Pond	22.6667	4.57005	1	70.83	147.49	22.6667		0.0001		D		131.6	PP			Dean et al. 2020	Kuhn et al., 2021	https://doi.org/10.1038/s41467-020-15511-6
365	P12,Russia	Russia	Small lake and Pond	23.5556	4.74927	1	70.83	147.49	23.5556		0.0001		D		131.6	PP			Dean et al. 2020	Kuhn et al., 2021	https://doi.org/10.1038/s41467-020-15511-6
366	PP1, Siberia, Russia	Russia	Small lake and Pond	30.68	6.35751	1	72.3734	126.493	30.68			0.95	D		139.6	TR			Knoblauch et al. 2015	Zheng et al., 2022	Knoblauch C, Spott O, Evgrafova S et al. (2015) Regulation of methane production, oxidation, and emission by vascular plants and bryophytes in ponds of the northeast Siberian polygonal tundra. Journal of Geophysical Research: Biogeosciences, 120, 2525-2541.
367	PP2, Siberia, Russia	Russia	Small lake and Pond	40.53	8.39863	1	72.3735	126.494	40.53			0.75	D		139.6	TR			Knoblauch et al. 2015	Zheng et al., 2022	Knoblauch C, Spott O, Evgrafova S et al. (2015) Regulation of methane production, oxidation, and emission by vascular plants and bryophytes in ponds of the northeast Siberian polygonal tundra. Journal of Geophysical Research: Biogeosciences, 120, 2525-2541.
368	PP3, Siberia, Russia	Russia	Small lake and Pond	0.3	0.062166	1	72.3709	126.485	0.3			0.5	D		139.6	TR			Knoblauch et al. 2015	Zheng et al., 2022	Knoblauch C, Spott O, Evgrafova S et al. (2015) Regulation of methane production, oxidation, and emission by vascular plants and bryophytes in ponds of the northeast Siberian polygonal tundra. Journal of Geophysical Research: Biogeosciences, 120, 2525-2541.
369	PP4, Siberia, Russia	Russia	Small lake and Pond	45.2	9.36634	1	72.3707	126.489	45.2			0.3	D		139.6	TR			Knoblauch et al. 2015	Zheng et al., 2022	Knoblauch C, Spott O, Evgrafova S et al. (2015) Regulation of methane production, oxidation, and emission by vascular plants and bryophytes in ponds of the northeast Siberian polygonal tundra. Journal of Geophysical Research: Biogeosciences, 120, 2525-2541.
370	Parakkai Lake, India	India	Small lake and Pond	284.64	103.894	1	8.144	77.456	284.64				D		365	TR			Selvam et al., 2014	Johnson et al 2022	Selvam BP, Natchimuthu S, Arunachalam L et al. (2014) Methane and carbon dioxide emissions from inland waters in India-implications for large scale greenhouse gas balances. Global Change Biology, 20, 3397-3407.
371	Pass, United States of America	United States of America	Small lake and Pond	28.16	7.34525	1	39.65	-105.879	28.16		0.016	3.5	D		216.2	B			Smith and Lewis, 1992	Johnson et al 2022	Smith LK, Lewis WM (1992) Seasonality of methane emissions from five lakes and associated wetlands of the Colorado Rockies. Global Biogeochemical Cycles, 6, 323-328.
167	Inland Pond, Canada	Canada	Small lake and Pond	69.25	11.1991	1	65.52	-74.58	69.25				D		74.6	B			Rouse et al. 1995	Johnson et al 2022	Rouse, W. R., Holland, S., & Moore, T. R. (1995). Variability in methane emissions from wetlands at Northern treeline near Churchill, Manitoba,Canada. Arctic Antarctic and Alpine Research, 27(2), 146–156.
274	Lake 227, Canada	Canada	Small lake and Pond	2.712	0.673607	1	49.7	-93.7	2.712				D		198.4	T			Rudd et al., 1978	Johnson et al 2022	Rudd, J. M., & Hamilton, R. D. (1978). Methane cycling in a eutrophic shield lake and its effect on whole lake metabolism. Limnology and Oceanography, 23, 337–348.
414	Pur.Oz1, Russia	Russia	Small lake and Pond	7.47	1.5197	1	64.46	77.08	7.47		0.1		D		134.2	B			Sabrekov et al. 2012	Johnson et al 2022	Sabrekov, A. F., Glagolev, M. V., Filippov, I. V., Kazantsev, V. S., Lapshina, E. D., Machida, T., & Maksyutov, S. S. (2012). Methane emissions from North and Middle Taiga mires of western Siberia: Bc8 standard model. Moscow Soil Science Bulletin, 67, 45–53.
434	Sir 3, Russia	Russia	Small lake and Pond	20.9	4.43623	3	60.89	68.64	20.9				D		146.8	B			Sabrekov et al. 2012	Johnson et al 2022	Sabrekov, A. F., Glagolev, M. V., Filippov, I. V., Kazantsev, V. S., Lapshina, E. D., Machida, T., & Maksyutov, S. S. (2012). Methane emissions from North and Middle Taiga mires of western Siberia: Bc8 standard model. Moscow Soil Science Bulletin, 67, 45–53.
435	Sir 4, Russia	Russia	Small lake and Pond	164.9	35.0017	3	60.89	68.64	164.9				D		146.8	B			Sabrekov et al. 2012	Johnson et al 2022	Sabrekov, A. F., Glagolev, M. V., Filippov, I. V., Kazantsev, V. S., Lapshina, E. D., Machida, T., & Maksyutov, S. S. (2012). Methane emissions from North and Middle Taiga mires of western Siberia: Bc8 standard model. Moscow Soil Science Bulletin, 67, 45–53.
436	Sir 5, Russia	Russia	Small lake and Pond	34.1	7.23807	3	60.89	68.64	34.1				D		146.8	B			Sabrekov et al. 2012	Johnson et al 2022	Sabrekov, A. F., Glagolev, M. V., Filippov, I. V., Kazantsev, V. S., Lapshina, E. D., Machida, T., & Maksyutov, S. S. (2012). Methane emissions from North and Middle Taiga mires of western Siberia: Bc8 standard model. Moscow Soil Science Bulletin, 67, 45–53.
86	Bois-des-Bel Pools, Canada	Canada	Small lake and Pond	85.7474	23.7589	1	47.97	-69.43					D		239.4	PP	Ombrotrophic peatland/Bog		Strack and Zuback 2013	Taillardat et al., 2024	Strack, M., & Zuback, Y. C. A. (2013). Annual carbon balance of a peatland 10 years following restoration. Biogeosciences, 10(5), 2885–2897
379	Pingo pond, United States of America	United States of America	Small lake and Pond	14.7	3.44539	1	60.46	-161.45	14.7				D		178.4	TH			Bartlett et al. 1992	Johnson et al 2022	Bartlett, K. B., Crill, P. M., Sass, R. L., Harriss, R. C., & Dise, N. B. (1992). Methane emissions from tundra environments in the Yukon-Kuskokwim delta, Alaska. Journal of Geophysical Research, 97, 16645–16660.
380	Pinjarra 1, Australia	Australia	Small lake and Pond	34.0566	12.4307	1	-27.5372	152.914	34.0566		0.056782		D		365	TR		Mesotrophic	Grinham et al 2018	Rosentreter et al., 2021	Grinham, A. et al. The importance of small artificial water bodies as sources of methane emissions in Queensland, Australia. Hydrology and Earth System Sciences Discussions 1–27 (2018). doi:10.5194/hess-2018-294
381	Pinjarra 2, Australia	Australia	Small lake and Pond	205.341	74.9496	1	-27.5294	152.924	205.341		0.001943		D		365	TR		Eutrophic	Grinham et al 2018	Rosentreter et al., 2021	Grinham, A. et al. The importance of small artificial water bodies as sources of methane emissions in Queensland, Australia. Hydrology and Earth System Sciences Discussions 1–27 (2018). doi:10.5194/hess-2018-294
382	Pinjarra 3, Australia	Australia	Small lake and Pond	193.321	70.5623	1	-27.5294	152.923	193.321		0.00021		D		365	TR		Eutrophic	Grinham et al 2018	Rosentreter et al., 2021	Grinham, A. et al. The importance of small artificial water bodies as sources of methane emissions in Queensland, Australia. Hydrology and Earth System Sciences Discussions 1–27 (2018). doi:10.5194/hess-2018-294
383	Plotnikovo,Russia	Russia	Small lake and Pond	172.8	40.3315	1	56.8	82.75	172.8		0.009	1.8	D		177	PP			Sabrekov et al. 2017	Kuhn et al., 2021	https://doi.org/10.5194/bg-14-3715-2017
384	Polegar, Brazil	Brazil	Small lake and Pond	15.907	4.94646	2	-32.028	-52.094	15.1432	1.52766	0.01		DE		287.8	T			Palma-Silva et al. 2013; Marinho et al., 2015	Rosentreter et al., 2021; Johnson et al 2022	Palma-Silva, C. et al. Methane emissions in two small shallow neotropical lakes: The role of temperature and trophic level. Atmospheric Environment 81, 373–379 (2013).
385	Pond 1, Canada	Canada	Small lake and Pond	2.8426	0.685749	1	51.483	-80.45	2.8426				D		188.2	B			Hamilton et al., 1992	Johnson et al 2022	Hamilton, J. D. (1992). Methane and carbon dioxide flux ponds and lakes of the Hudson Bay lowlands, Ph.D. thesis. University of Manitoba.
386	Pond 10, Canada	Canada	Small lake and Pond	59.9863	14.4711	1	51.483	-80.45	59.9863				D		188.2	B			Hamilton et al., 1992	Johnson et al 2022	Hamilton, J. D. (1992). Methane and carbon dioxide flux ponds and lakes of the Hudson Bay lowlands, Ph.D. thesis. University of Manitoba.
387	Pond 11, Canada	Canada	Small lake and Pond	159.581	38.4973	1	51.483	-80.45	159.581				D		188.2	B			Hamilton et al., 1992	Johnson et al 2022	Hamilton, J. D. (1992). Methane and carbon dioxide flux ponds and lakes of the Hudson Bay lowlands, Ph.D. thesis. University of Manitoba.
388	Pond 12, Canada	Canada	Small lake and Pond	82.3392	19.8635	1	51.483	-80.45	82.3392				D		188.2	B			Hamilton et al., 1992	Johnson et al 2022	Hamilton, J. D. (1992). Methane and carbon dioxide flux ponds and lakes of the Hudson Bay lowlands, Ph.D. thesis. University of Manitoba.
389	Pond 13, Canada	Canada	Small lake and Pond	481.248	116.096	1	51.483	-80.45	481.248				D		188.2	B			Hamilton et al., 1992	Johnson et al 2022	Hamilton, J. D. (1992). Methane and carbon dioxide flux ponds and lakes of the Hudson Bay lowlands, Ph.D. thesis. University of Manitoba.
390	Pond 14, Canada	Canada	Small lake and Pond	128.39	30.9729	1	51.483	-80.45	128.39				D		188.2	B			Hamilton et al., 1992	Johnson et al 2022	Hamilton, J. D. (1992). Methane and carbon dioxide flux ponds and lakes of the Hudson Bay lowlands, Ph.D. thesis. University of Manitoba.
391	Pond 15, Canada	Canada	Small lake and Pond	70.2432	16.9455	1	51.483	-80.45	70.2432				D		188.2	B			Hamilton et al., 1992	Johnson et al 2022	Hamilton, J. D. (1992). Methane and carbon dioxide flux ponds and lakes of the Hudson Bay lowlands, Ph.D. thesis. University of Manitoba.
392	Pond 16, Canada	Canada	Small lake and Pond	126.144	30.431	1	51.483	-80.45	126.144				D		188.2	B			Hamilton et al., 1992	Johnson et al 2022	Hamilton, J. D. (1992). Methane and carbon dioxide flux ponds and lakes of the Hudson Bay lowlands, Ph.D. thesis. University of Manitoba.
393	Pond 17, Canada	Canada	Small lake and Pond	76.6368	18.4879	1	51.483	-80.45	76.6368				D		188.2	B			Hamilton et al., 1992	Johnson et al 2022	Hamilton, J. D. (1992). Methane and carbon dioxide flux ponds and lakes of the Hudson Bay lowlands, Ph.D. thesis. University of Manitoba.
394	Pond 18, Canada	Canada	Small lake and Pond	203.04	48.9814	1	51.483	-80.45	203.04				D		188.2	B			Hamilton et al., 1992	Johnson et al 2022	Hamilton, J. D. (1992). Methane and carbon dioxide flux ponds and lakes of the Hudson Bay lowlands, Ph.D. thesis. University of Manitoba.
395	Pond 19, Canada	Canada	Small lake and Pond	179.28	43.2495	1	51.483	-80.45	179.28				D		188.2	B			Hamilton et al., 1992	Johnson et al 2022	Hamilton, J. D. (1992). Methane and carbon dioxide flux ponds and lakes of the Hudson Bay lowlands, Ph.D. thesis. University of Manitoba.
396	Pond 2, Canada	Canada	Small lake and Pond	127.613	30.7853	1	51.483	-80.45	127.613				D		188.2	B			Hamilton et al., 1992	Johnson et al 2022	Hamilton, J. D. (1992). Methane and carbon dioxide flux ponds and lakes of the Hudson Bay lowlands, Ph.D. thesis. University of Manitoba.
397	Pond 20, Canada	Canada	Small lake and Pond	190.08	45.8549	1	51.483	-80.45	190.08				D		188.2	B			Hamilton et al., 1992	Johnson et al 2022	Hamilton, J. D. (1992). Methane and carbon dioxide flux ponds and lakes of the Hudson Bay lowlands, Ph.D. thesis. University of Manitoba.
398	Pond 21, Canada	Canada	Small lake and Pond	316.829	76.4318	1	51.483	-80.45	316.829				D		188.2	B			Hamilton et al., 1992	Johnson et al 2022	Hamilton, J. D. (1992). Methane and carbon dioxide flux ponds and lakes of the Hudson Bay lowlands, Ph.D. thesis. University of Manitoba.
399	Pond 22, Canada	Canada	Small lake and Pond	345.6	83.3725	1	51.483	-80.45	345.6				D		188.2	B			Hamilton et al., 1992	Johnson et al 2022	Hamilton, J. D. (1992). Methane and carbon dioxide flux ponds and lakes of the Hudson Bay lowlands, Ph.D. thesis. University of Manitoba.
400	Pond 23, Canada	Canada	Small lake and Pond	333.158	80.3711	1	51.483	-80.45	333.158				D		188.2	B			Hamilton et al., 1992	Johnson et al 2022	Hamilton, J. D. (1992). Methane and carbon dioxide flux ponds and lakes of the Hudson Bay lowlands, Ph.D. thesis. University of Manitoba.
401	Pond 24, Canada	Canada	Small lake and Pond	160.704	38.7682	1	51.483	-80.45	160.704				D		188.2	B			Hamilton et al., 1992	Johnson et al 2022	Hamilton, J. D. (1992). Methane and carbon dioxide flux ponds and lakes of the Hudson Bay lowlands, Ph.D. thesis. University of Manitoba.
402	Pond 6, Canada	Canada	Small lake and Pond	107.877	26.0242	1	51.483	-80.45	107.877				D		188.2	B			Hamilton et al., 1992	Johnson et al 2022	Hamilton, J. D. (1992). Methane and carbon dioxide flux ponds and lakes of the Hudson Bay lowlands, Ph.D. thesis. University of Manitoba.
403	Pond 7, Canada	Canada	Small lake and Pond	49.3714	11.9104	1	51.483	-80.45	49.3714				D		188.2	B			Hamilton et al., 1992	Johnson et al 2022	Hamilton, J. D. (1992). Methane and carbon dioxide flux ponds and lakes of the Hudson Bay lowlands, Ph.D. thesis. University of Manitoba.
404	Pond 8, Canada	Canada	Small lake and Pond	48.384	11.6722	1	51.483	-80.45	48.384				D		188.2	B			Hamilton et al., 1992	Johnson et al 2022	Hamilton, J. D. (1992). Methane and carbon dioxide flux ponds and lakes of the Hudson Bay lowlands, Ph.D. thesis. University of Manitoba.
320	Medium lake, United States of America	United States of America	Small lake and Pond	44	7.66392	1	71.13	-156.34	44				D		92.4	TH			Sturtevant et al. 2013	Johnson et al 2022	Sturtevant, C. S., & Oechel, W. C. (2013). Spatial variation in landscape-level CO2 and CH4 fluxes from Arctic coastal tundra: Influence from vegetation, wetness, and the thaw lake cycle. Global Change Biology, 19(9), 2853–2866.
353	Old lake, United States of America	United States of America	Small lake and Pond	32	5.57376	1	71.13	-156.34	32				D		92.4	TH			Sturtevant et al. 2013	Johnson et al 2022	Sturtevant, C. S., & Oechel, W. C. (2013). Spatial variation in landscape-level CO2 and CH4 fluxes from Arctic coastal tundra: Influence from vegetation, wetness, and the thaw lake cycle. Global Change Biology, 19(9), 2853–2866.
407	Port precinct, Australia	Australia	Small lake and Pond	144.24	52.6475	1	-27.3917	153.168	144.24		0.038285		D		365	TR		Eutrophic	Grinham et al 2018	Rosentreter et al., 2021	Grinham, A. et al. The importance of small artificial water bodies as sources of methane emissions in Queensland, Australia. Hydrology and Earth System Sciences Discussions 1–27 (2018). doi:10.5194/hess-2018-294
408	Postilampi, Finland	Finland	Small lake and Pond	49.15	NA	1	63.03	27.56		49.15	0.03	4.3	E	Yes	NA	GP			Huttunen et al. 2001; Huttunen et al. 2003	Johnson et al 2022	Huttunen, J. T., Lappalainen, K. M., Saarijärvi, E., Väisänen, T., & Martikainen, P. J. (2001). A novel sediment gas sampler and a subsurface gas collector used for measurement of the ebullition of methane and carbon dioxide from a Eutrophied Lake. Science of the Total Environment, 266(1), 153–158.; Huttunen, J. T., Alm, J., Saarijärvi, E., Matti Lappalainen, K., Silvola, J., & Martikainen, P. J.…
409	Potou, Ivory Coast	Ivory Coast	Small lake and Pond	3.3888	1.23691	2	5.331	-3.978	3.3888				D		365	TR			Koné et al., 2008; Koné et al., 2010	Johnson et al 2022	Koné, Y. J.-M. (2008). Dynamics of carbon dioxide and methane in the mangroves of Vietnam, and the rivers and the lagoons of Ivory Coast Dynamique du dioxyde de carbone et du méthane dans les mangroves du Vietnam, les rivières et les lagunes de la Côte d’Ivoire. Ph.D. thesis.;Koné, Y. J.-M., Abril, G., Delille, B., & Borges, A. V. (2010). Seasonal variability of methane in the rivers and lagoons …
410	Presa, Brazil	Brazil	Small lake and Pond	25.7218	9.38846	1	-18.997	-57.424	13.7443	11.9775			DE		365	TR			Bastviken et al., 2010	Johnson et al 2022	Bastviken, D., Tranvik, L. J., Downing, J. A., Crill, P. M., & Enrich-Prast, A. (2011). Freshwater methane emissions offset the continental carbon sink. Science, 331, 50–51. https://doi.org/10.1126/science.1196808
411	Priest Pot, United Kingdom	United Kingdom	Small lake and Pond	161.41	58.9146	14	54.372	-2.991	6.03791	155.372	0.01	3.9	DE		365	T			Casper et al., 2000	Johnson et al 2022	Casper, P., Maberly, S. C., Hall, G. H., & Finlay, B. J. (2000). Fluxes of methane and carbon dioxide from a small productive lake to the atmosphere. Biogeochemistry, 49(1), 1–19.
412	Pulicat Lake, India	India	Small lake and Pond	0.32	0.1168	1	13.749	80.067	0.32	0			DE		365	TR			Selvam et al., 2014	Johnson et al 2022	Selvam BP, Natchimuthu S, Arunachalam L et al. (2014) Methane and carbon dioxide emissions from inland waters in India-implications for large scale greenhouse gas balances. Global Change Biology, 20, 3397-3407.
413	Puliyalam Lake, India	India	Small lake and Pond	8.64	3.1536	1	13.616	79.996	1.92	6.72			DE		365	TR			Selvam et al., 2014	this study	Selvam BP, Natchimuthu S, Arunachalam L et al. (2014) Methane and carbon dioxide emissions from inland waters in India-implications for large scale greenhouse gas balances. Global Change Biology, 20, 3397-3407.
491	Young lake, United States of America	United States of America	Small lake and Pond	38.7	6.74077	1	71.13	-156.34	38.7				D		92.4	TH			Sturtevant et al. 2013	Johnson et al 2022	Sturtevant, C. S., & Oechel, W. C. (2013). Spatial variation in landscape-level CO2 and CH4 fluxes from Arctic coastal tundra: Influence from vegetation, wetness, and the thaw lake cycle. Global Change Biology, 19(9), 2853–2866.
326	Mizorogaike, Japan	Japan	Small lake and Pond	318.672	116.315	1	35.067	135.75	318.672				D		365	T			Sugimoto et al., 1997	Johnson et al 2022	Sugimoto, A., & Fujita, N. (1997). Characteristics of methane emission from different vegetations on a wetland. Tellus B: Chemical and Physical Meteorology, 49B, 382–392.
151	Gouin, Canada	Canada	Small lake and Pond	6.6	1.61898	1	48.56	-73.81	6.6				D		194	B			Tremblay et al., 2005	Johnson et al 2022	Tremblay, A., Therrien, J., Hamlin, B., Wichmann, E., & LeDrew, L. J. (2005). Greenhouse gas emissions—Fluxes and processes hydroelectric reservoirs and natural environments. In A. Tremblay, L. Varfalvy, C. Roehm, & M. Garneau (Eds.), (pp. 209–232). Springer.
258	La Grande 3, Canada	Canada	Small lake and Pond	0.9	0.190782	1	53.76	-74.22	0.9				D		146.4	B			Tremblay et al., 2005	Johnson et al 2022	Tremblay, A., Therrien, J., Hamlin, B., Wichmann, E., & LeDrew, L. J. (2005). Greenhouse gas emissions—Fluxes and processes hydroelectric reservoirs and natural environments. In A. Tremblay, L. Varfalvy, C. Roehm, & M. Garneau (Eds.), (pp. 209–232). Springer.
418	Red Rock, United States of America	United States of America	Small lake and Pond	47.04	12.2699	1	40.081	-105.541	47.04		0.021	1	D		216.2	B			Smith and Lewis, 1992	Johnson et al 2022	Smith LK, Lewis WM (1992) Seasonality of methane emissions from five lakes and associated wetlands of the Colorado Rockies. Global Biogeochemical Cycles, 6, 323-328.
419	Rhode Island, USA	United States of America	Small lake and Pond	191.228	59.0627	1	41.5167	-71.5833	191.228			0.76	D		284.8				Lazar et al. 2014	Zheng et al., 2022	Lazar JG, Addy K, Welsh MK et al. (2014) Resurgent beaver ponds in the northeastern United States: Implications for greenhouse gas emissions. Journal of Environmental Quality, 43, 1844-1852.
294	Lake of the Woods, Canada	Canada	Small lake and Pond	50.1	12.4438	1	49.45	-94.3	50.1				D		198.4	T			Tremblay et al., 2005	Johnson et al 2022	Tremblay, A., Therrien, J., Hamlin, B., Wichmann, E., & LeDrew, L. J. (2005). Greenhouse gas emissions—Fluxes and processes hydroelectric reservoirs and natural environments. In A. Tremblay, L. Varfalvy, C. Roehm, & M. Garneau (Eds.), (pp. 209–232). Springer.
421	Rinconada, Colombia	Colombia	Small lake and Pond	89.676	32.7317	1	10.961	-74.483	89.676				D		365	TR			Konnerup et al., 2014	Johnson et al 2022	Konnerup, D., Betancourt-Portela, J. M., Villamil, C., & Parra, J. P. (2014). Nitrous oxide and methane emissions from the restored mangrove ecosystem of the Ciénaga Grande de Santa Marta, Colombia. Estuarine, Coastal and Shelf Science, 140, 43–51. https://doi.org/10.1016/j.ecss.2014.01.006
316	Manic 2, Canada	Canada	Small lake and Pond	6.7	1.72981	1	48.96	-68.54	6.7				D		212.4	B			Tremblay et al., 2005	Johnson et al 2022	Tremblay, A., Therrien, J., Hamlin, B., Wichmann, E., & LeDrew, L. J. (2005). Greenhouse gas emissions—Fluxes and processes hydroelectric reservoirs and natural environments. In A. Tremblay, L. Varfalvy, C. Roehm, & M. Garneau (Eds.), (pp. 209–232). Springer.
317	Manic 3 , Canada	Canada	Small lake and Pond	1.1	0.284922	1	50.5	-68.49	1.1				D		213.6	B			Tremblay et al., 2005	Johnson et al 2022	Tremblay, A., Therrien, J., Hamlin, B., Wichmann, E., & LeDrew, L. J. (2005). Greenhouse gas emissions—Fluxes and processes hydroelectric reservoirs and natural environments. In A. Tremblay, L. Varfalvy, C. Roehm, & M. Garneau (Eds.), (pp. 209–232). Springer.
424	SAS,Canada	Canada	Small lake and Pond	100.27	24.1189	2	55.22	-77.68	94.67	5.6	0.0004	1.8	DE		187.2	PP/T		Oligotrophic	Matveev et al. 2016	Kuhn et al., 2021	https://doi.org/10.1002/lno.10311
422	Robertson, Canada	Canada	Small lake and Pond	1.5	0.35871	1	51.12	-60.6	1.5				D		185.2	B			Tremblay et al., 2005	Johnson et al 2022	Tremblay, A., Therrien, J., Hamlin, B., Wichmann, E., & LeDrew, L. J. (2005). Greenhouse gas emissions—Fluxes and processes hydroelectric reservoirs and natural environments. In A. Tremblay, L. Varfalvy, C. Roehm, & M. Garneau (Eds.), (pp. 209–232). Springer.
426	SUKA P1, India	India	Small lake and Pond	516.007	188.342	1	13.7	80.028	516.007				D		365	TR			Selvam et al., 2014	this study	Selvam BP, Natchimuthu S, Arunachalam L et al. (2014) Methane and carbon dioxide emissions from inland waters in India-implications for large scale greenhouse gas balances. Global Change Biology, 20, 3397-3407.
427	Saskatchewan, Canada	Canada	Small lake and Pond	284.569	78.1314	2	52.2	-106.083					T		235.8				Pennock et al. 2010	Zheng et al., 2022	Pennock D, Yates T, Bedard-Haughn A et al. (2010) Landscape controls on N2O and CH4 emissions from freshwater mineral soil wetlands of the Canadian Prairie Pothole region. Geoderma, 155, 308-319.
425	SM 2, Canada	Canada	Small lake and Pond	2.1	0.577164	1	50.28	-66.68	2.1				D		236.2	B			Tremblay et al., 2005	Johnson et al 2022	Tremblay, A., Therrien, J., Hamlin, B., Wichmann, E., & LeDrew, L. J. (2005). Greenhouse gas emissions—Fluxes and processes hydroelectric reservoirs and natural environments. In A. Tremblay, L. Varfalvy, C. Roehm, & M. Garneau (Eds.), (pp. 209–232). Springer.
432	Shoal, Canada	Canada	Small lake and Pond	435.52	110.735	1	49.61	-94.88	435.52				D		206.8	B			Tremblay et al., 2005	Johnson et al 2022	Tremblay, A., Therrien, J., Hamlin, B., Wichmann, E., & LeDrew, L. J. (2005). Greenhouse gas emissions—Fluxes and processes hydroelectric reservoirs and natural environments. In A. Tremblay, L. Varfalvy, C. Roehm, & M. Garneau (Eds.), (pp. 209–232). Springer.
138	Gaddtjarn, Sweden	Sweden	Small lake and Pond	4.48	1.15665	1	59.859	15.183	4.48				D		212.4	T			Van Hardenbroek et al., 2012	Johnson et al 2022	van Hardenbroek, M., Lotter, A. F., Bastviken, D., Duc, N. T., & Heiri, O. (2012). Relationship between δ13C of chironomid remains and methane flux in Swedish lakes. Freshwater Biology, 57, 166–177.
288	Lake N3, Russia	Russia	Small lake and Pond	10.24	2.06459	1	70.821	147.421	10.24				D		131.6	B			van Hardenbroek et al., 2013	Johnson et al 2022	van Hardenbroek, M., Heiri, O., Parmentier, F. J. W., Bastviken, D., Ilyashuk, B. P., Wiklund, J. A., et al. (2013). Evidence for past variations in methane availability in a Siberian thermokarst lake based on δ13c of chitinous invertebrate remains. Quaternary Science Reviews, 66, 74–84.
289	Lake N4, Russia	Russia	Small lake and Pond	19.2	3.8711	1	70.826	147.51	19.2				D		131.6	B			van Hardenbroek et al., 2013	Johnson et al 2022	van Hardenbroek, M., Heiri, O., Parmentier, F. J. W., Bastviken, D., Ilyashuk, B. P., Wiklund, J. A., et al. (2013). Evidence for past variations in methane availability in a Siberian thermokarst lake based on δ13c of chitinous invertebrate remains. Quaternary Science Reviews, 66, 74–84.
290	Lake N5, Russia	Russia	Small lake and Pond	21.28	4.29047	1	70.826	147.515	21.28				D		131.6	B			van Hardenbroek et al., 2013	Johnson et al 2022	van Hardenbroek, M., Heiri, O., Parmentier, F. J. W., Bastviken, D., Ilyashuk, B. P., Wiklund, J. A., et al. (2013). Evidence for past variations in methane availability in a Siberian thermokarst lake based on δ13c of chitinous invertebrate remains. Quaternary Science Reviews, 66, 74–84.
291	Lake N6, Russia	Russia	Small lake and Pond	51.36	10.3264	1	70.824	147.531	51.36				D		130.8	B			van Hardenbroek et al., 2013	Johnson et al 2022	van Hardenbroek, M., Heiri, O., Parmentier, F. J. W., Bastviken, D., Ilyashuk, B. P., Wiklund, J. A., et al. (2013). Evidence for past variations in methane availability in a Siberian thermokarst lake based on δ13c of chitinous invertebrate remains. Quaternary Science Reviews, 66, 74–84.
292	Lake N7, Russia	Russia	Small lake and Pond	60.48	12.1601	1	70.823	147.536	60.48				D		130.8	B			van Hardenbroek et al., 2013	Johnson et al 2022	van Hardenbroek, M., Heiri, O., Parmentier, F. J. W., Bastviken, D., Ilyashuk, B. P., Wiklund, J. A., et al. (2013). Evidence for past variations in methane availability in a Siberian thermokarst lake based on δ13c of chitinous invertebrate remains. Quaternary Science Reviews, 66, 74–84.
293	Lake S2, Russia	Russia	Small lake and Pond	13.6	2.73442	1	70.746	147.586	13.6				D		130.8	B			van Hardenbroek et al., 2013	Johnson et al 2022	van Hardenbroek, M., Heiri, O., Parmentier, F. J. W., Bastviken, D., Ilyashuk, B. P., Wiklund, J. A., et al. (2013). Evidence for past variations in methane availability in a Siberian thermokarst lake based on δ13c of chitinous invertebrate remains. Quaternary Science Reviews, 66, 74–84.
437	Site 16,Canada	Canada	Small lake and Pond	919	237.396	1	50	-79.45	919				D		212.6	BP			Bubier et al. 1993	Kuhn et al., 2021	https://doi.org/10.2307/1939577
438	Site 17,Canada	Canada	Small lake and Pond	136	35.1315	1	50	-79.45	136				D		212.6	BP			Bubier et al. 1993	Kuhn et al., 2021	https://doi.org/10.2307/1939577
439	Site 18,Canada	Canada	Small lake and Pond	365	94.2868	1	50	-79.45	365				D		212.6	BP			Bubier et al. 1993	Kuhn et al., 2021	https://doi.org/10.2307/1939577
440	Site 19,Canada	Canada	Small lake and Pond	147	37.973	1	50	-79.45	147				D		212.6	BP			Bubier et al. 1993	Kuhn et al., 2021	https://doi.org/10.2307/1939577
123	Eyak N (EYN), USA	United States of America	Small lake and Pond	9.87546	2.31461	3	60.492	-145.661			0.00667	0.616667	D		178.4	PP	Wetland		Vizza et al. 2022	Taillardat et al., 2024	Vizza, C., Jones, S. E., Hart, J. A., West, W. E., & Lamberti, G. A. (2022). Pond methane dynamics, from microbial communities to ecosystem budget, during summer in Alaska. Limnology and Oceanography, 67(3), 450–467.
442	Small lakes, United States of America	United States of America	Small lake and Pond	189	44.2978	1	60.46	-161.45	77	112			DE		178.4	TH			Bartlett et al. 1992	Johnson et al 2022	Bartlett, K. B., Crill, P. M., Sass, R. L., Harriss, R. C., & Dise, N. B. (1992). Methane emissions from tundra environments in the Yukon-Kuskokwim delta, Alaska. Journal of Geophysical Research, 97, 16645–16660.
443	Smith, United States of America	United States of America	Small lake and Pond	77.0565	18.0605	1	64.8675	-147.872	21.192	66.4605	0.047005	4.4	DE		178.4	TH			Engram et al. 2020; Sepulveda-Jauregui et al. 2015	Kuhn et al., 2021; Johnson et al 2022	Sepulveda-Jauregui, A., Walter Anthony, K. M., Martinez-Cruz, K., Greene, S., & Thalasso, F. (2015). Methane and carbon dioxide emissions from 40 lakes along a north-south latitudinal transect in Alaska. Biogeosciences, 12(11), 3197–3223
124	Eyak S (EYS), USA	United States of America	Small lake and Pond	1.49628	0.350699	3	60.477	-145.683			0.00664	0.673333	D		178.4	PP	Wetland		Vizza et al. 2022	Taillardat et al., 2024	Vizza, C., Jones, S. E., Hart, J. A., West, W. E., & Lamberti, G. A. (2022). Pond methane dynamics, from microbial communities to ecosystem budget, during summer in Alaska. Limnology and Oceanography, 67(3), 450–467.
300	Lily (LIL), USA	United States of America	Small lake and Pond	6.51951	1.52804	3	60.52	-145.382			0.02054	0.65	D		178.4	PP	Wetland		Vizza et al. 2022	Taillardat et al., 2024	Vizza, C., Jones, S. E., Hart, J. A., West, W. E., & Lamberti, G. A. (2022). Pond methane dynamics, from microbial communities to ecosystem budget, during summer in Alaska. Limnology and Oceanography, 67(3), 450–467.
446	St Lucia 2, Australia	Australia	Small lake and Pond	92.1532	33.6359	1	-27.4984	153.017	92.1532		0.004291		D		365	TR		Eutrophic	Grinham et al 2018	Rosentreter et al., 2021	Grinham, A. et al. The importance of small artificial water bodies as sources of methane emissions in Queensland, Australia. Hydrology and Earth System Sciences Discussions 1–27 (2018). doi:10.5194/hess-2018-294
447	St Lucia 3, Australia	Australia	Small lake and Pond	56.0933	20.474	1	-27.4981	153.017	56.0933		0.001755		D		365	TR		Eutrophic	Grinham et al 2018	Rosentreter et al., 2021	Grinham, A. et al. The importance of small artificial water bodies as sources of methane emissions in Queensland, Australia. Hydrology and Earth System Sciences Discussions 1–27 (2018). doi:10.5194/hess-2018-294
448	Star, United States of America	United States of America	Small lake and Pond	83.05	NA	1	64.882	-147.768		83.05	0.0148	1.3	E	Yes	NA	GP			Engram et al. 2020	Kuhn et al., 2021	https://doi.org/10.1038/s41558-020-0762-8
449	Stevens Pond, United States of America	United States of America	Small lake and Pond	384.768	90.1819	1	64.86	-147.87	20.53	364.238	0.002	1.1	DE		178.4	TH			Sepulveda-Jauregui et al. 2015	Johnson et al 2022	Sepulveda-Jauregui A, Walter Anthony KM, Martinez-Cruz K et al. (2015) Methane and carbon dioxide emissions from 40 lakes along a north-south latitudinal transect in Alaska. Biogeosciences, 12, 3197-3223
420	Rich Hate Me (RHM), USA	United States of America	Small lake and Pond	7.26766	1.70339	3	60.478	-145.382			0.00357	0.483333	D		178.4	PP	Wetland		Vizza et al. 2022	Taillardat et al., 2024	Vizza, C., Jones, S. E., Hart, J. A., West, W. E., & Lamberti, G. A. (2022). Pond methane dynamics, from microbial communities to ecosystem budget, during summer in Alaska. Limnology and Oceanography, 67(3), 450–467.
429	Scott S (SCS), USA	United States of America	Small lake and Pond	10.3671	2.42984	3	60.491	-145.547			0.01037	0.823333	D		178.4	PP	Wetland		Vizza et al. 2022	Taillardat et al., 2024	Vizza, C., Jones, S. E., Hart, J. A., West, W. E., & Lamberti, G. A. (2022). Pond methane dynamics, from microbial communities to ecosystem budget, during summer in Alaska. Limnology and Oceanography, 67(3), 450–467.
450	Storey N (STN), USA	United States of America	Small lake and Pond	4.80948	1.12725	3	60.323	-145.161			0.15175	0.576667	D		178.4	PP	Wetland		Vizza et al. 2022	Taillardat et al., 2024	Vizza, C., Jones, S. E., Hart, J. A., West, W. E., & Lamberti, G. A. (2022). Pond methane dynamics, from microbial communities to ecosystem budget, during summer in Alaska. Limnology and Oceanography, 67(3), 450–467.
451	Storey S (STS), USA	United States of America	Small lake and Pond	0.748141	0.175349	3	60.306	-145.178			0.17749	0.57	D		178.4	PP	Wetland		Vizza et al. 2022	Taillardat et al., 2024	Vizza, C., Jones, S. E., Hart, J. A., West, W. E., & Lamberti, G. A. (2022). Pond methane dynamics, from microbial communities to ecosystem budget, during summer in Alaska. Limnology and Oceanography, 67(3), 450–467.
464	Tiedeman N (TIN), USA	United States of America	Small lake and Pond	1.60316	0.375748	1	60.431	-145.466			0.00677	0.6	D		178.4	PP	Wetland		Vizza et al. 2022	Taillardat et al., 2024	Vizza, C., Jones, S. E., Hart, J. A., West, W. E., & Lamberti, G. A. (2022). Pond methane dynamics, from microbial communities to ecosystem budget, during summer in Alaska. Limnology and Oceanography, 67(3), 450–467.
465	Tiedeman S (TIS), USA	United States of America	Small lake and Pond	1.28253	0.300599	2	60.425	-145.473			0.057	0.725	D		178.4	PP	Wetland		Vizza et al. 2022	Taillardat et al., 2024	Vizza, C., Jones, S. E., Hart, J. A., West, W. E., & Lamberti, G. A. (2022). Pond methane dynamics, from microbial communities to ecosystem budget, during summer in Alaska. Limnology and Oceanography, 67(3), 450–467.
456	THKP1, India	India	Small lake and Pond	833.76	304.322	1	10.809	79.139	833.76				D		365	TR			Selvam et al., 2014	Johnson et al 2022	Selvam BP, Natchimuthu S, Arunachalam L et al. (2014) Methane and carbon dioxide emissions from inland waters in India-implications for large scale greenhouse gas balances. Global Change Biology, 20, 3397-3407.
457	TSFP1, India	India	Small lake and Pond	18.08	6.5992	1	10.807	79.135	18.08	0			DE		365	TR			Selvam et al., 2014	this study	Selvam BP, Natchimuthu S, Arunachalam L et al. (2014) Methane and carbon dioxide emissions from inland waters in India-implications for large scale greenhouse gas balances. Global Change Biology, 20, 3397-3407.
458	TSFP2, India	India	Small lake and Pond	100.32	36.6168	1	10.814	79.135	3.52	96.8			DE		365	TR			Selvam et al., 2014	this study	Selvam BP, Natchimuthu S, Arunachalam L et al. (2014) Methane and carbon dioxide emissions from inland waters in India-implications for large scale greenhouse gas balances. Global Change Biology, 20, 3397-3407.
493	pool_mat_1992, Sweden	Sweden	Small lake and Pond	109.343	28.5975	4	63.73	20.1					D		217.2	PP	Ombrotrophic peatland/Bog		Waddington and Roulet 2000	Taillardat et al., 2024	Vizza, C., Jones, S. E., Hart, J. A., West, W. E., & Lamberti, G. A. (2022). Pond methane dynamics, from microbial communities to ecosystem budget, during summer in Alaska. Limnology and Oceanography, 67(3), 450–467.
460	Taiga Region, United States of America	United States of America	Small lake and Pond	5.84	1.43664	8	66.1256	-150.168	5.84		0.09		D		195	PP			Sasaki et al. 2016	Kuhn et al., 2021	https://doi.org/10.1016/j.polar.2016.06.010
461	Tea, United States of America	United States of America	Small lake and Pond	81.27	NA	1	66.502	-164.328		81.27	0.0075	5.9	E	Yes	NA	T			Engram et al. 2020	Kuhn et al., 2021	https://doi.org/10.1038/s41558-020-0762-8
462	Thermokarst Lake,Russia	Russia	Small lake and Pond	27.1111	5.46614	1	70.83	147.49	27.1111		0.45		D		131.6	T			Dean et al. 2020	Kuhn et al., 2021	https://doi.org/10.1038/s41467-020-15511-6
463	Three Gorges Floodplain, China	China	Small lake and Pond	458.88	106.91	1	31.0833	108.45	122.88	336			DE		176.4	GP			Miller et al. 2019	Zheng et al., 2022	Miller BL, Chen H, He Y et al. (2019) Magnitudes and drivers of greenhouse gas fluxes in floodplain ponds during drawdown and inundation by the Three Gorges Reservoir. Journal of Geophysical Research: Biogeosciences, 124, 2499-2517.
170	J.C. Boyle , United States of America	United States of America	Small lake and Pond	456.16	NA	1	42.133	-122.033		456.16			E	Yes	NA	T			Walter Anthony et al 2016	Johnson et al 2022	Walter Anthony, K., Daanen, R., Anthony, P. et al. Methane emissions proportional to permafrost carbon thawed in Arctic lakes since the 1950s. Nature Geosci 9, 679–682 (2016).
186	Kachess, United States of America	United States of America	Small lake and Pond	0.535	NA	1	45.367	-122.25		0.535	18.37	0	E	Yes	NA	T			Walter Anthony et al 2016	Johnson et al 2022	Walter Anthony, K., Daanen, R., Anthony, P. et al. Methane emissions proportional to permafrost carbon thawed in Arctic lakes since the 1950s. Nature Geosci 9, 679–682 (2016).
265	Lacamas, United States of America	United States of America	Small lake and Pond	106.46	NA	1	45.367	-122.25		106.46			E	Yes	NA	T			Walter Anthony et al 2016	Johnson et al 2022	Walter Anthony, K., Daanen, R., Anthony, P. et al. Methane emissions proportional to permafrost carbon thawed in Arctic lakes since the 1950s. Nature Geosci 9, 679–682 (2016).
153	Grass, Russia	Russia	Small lake and Pond	76.3	15.5652	1	68.45	161.2	51.7	24.6	0.0787	12	DE		135	TH			Walter Anthony et al. 2010	Johnson et al 2022	Walter Anthony, K. M., Vas, D. A., Brosius, L., Chapin, F. S., Zimov, S. A., & Zhuang, Q. (2010). Estimating methane emissions from northern lakes using ice-bubble surveys. Limnology and Oceanography: Methods, 8(11), 592–609.
343	NE2, United States of America	United States of America	Small lake and Pond	26.4	NA	1	69.35	-149.38		26.4	0.067	2.7	E	Yes	NA	GP			Walter Anthony et al. 2010	Johnson et al 2022	Walter Anthony, K. M., Vas, D. A., Brosius, L., Chapin, F. S., Zimov, S. A., & Zhuang, Q. (2010). Estimating methane emissions from northern lakes using ice-bubble surveys. Limnology and Oceanography: Methods, 8(11), 592–609.
469	Tuumpu,Russia	Russia	Small lake and Pond	37.8	7.05499	1	62.11	130.34	37.8			2.5	D		110.2	T			Desyatkin et al. 2009	Kuhn et al., 2021	https://doi.org/10.1111/j.1747-0765.2009.00389.x
470	U1,Canada	Canada	Small lake and Pond	87.1892	19.6176	1	55.9827	-115.193	44.3384	42.8508	0.1	2	DE		165	PP			Kuhn et al. unpublished	Kuhn et al., 2021	Kuhn, M. A., Varner, R. K., Bastviken, D., Crill, P., MacIntyre, S., Turetsky, M., Walter Anthony, K., McGuire, A. D., & Olefeldt, D. (2021). BAWLD-CH&lt;sub&gt;4&lt;/sub&gt;: A comprehensive dataset of methane fluxes from boreal and arctic ecosystems. Earth System Science Data, 13(11), 5151–5189. https://doi.org/10.5194/essd-13-5151-2021
471	U2,Canada	Canada	Small lake and Pond	92.0229	20.7052	1	56.0108	-115.366	77.5051	14.5178	0.003	0.8	DE		165	PP			Kuhn et al. unpublished	Kuhn et al., 2021	Kuhn, M. A., Varner, R. K., Bastviken, D., Crill, P., MacIntyre, S., Turetsky, M., Walter Anthony, K., McGuire, A. D., & Olefeldt, D. (2021). BAWLD-CH&lt;sub&gt;4&lt;/sub&gt;: A comprehensive dataset of methane fluxes from boreal and arctic ecosystems. Earth System Science Data, 13(11), 5151–5189. https://doi.org/10.5194/essd-13-5151-2021
472	U3,Canada	Canada	Small lake and Pond	22.7041	5.10842	1	56.0096	-115.353	13.1777	9.5264	0.082	1.5	DE		165	PP			Kuhn et al. unpublished	Kuhn et al., 2021	Kuhn, M. A., Varner, R. K., Bastviken, D., Crill, P., MacIntyre, S., Turetsky, M., Walter Anthony, K., McGuire, A. D., & Olefeldt, D. (2021). BAWLD-CH&lt;sub&gt;4&lt;/sub&gt;: A comprehensive dataset of methane fluxes from boreal and arctic ecosystems. Earth System Science Data, 13(11), 5151–5189. https://doi.org/10.5194/essd-13-5151-2021
473	U4,Canada	Canada	Small lake and Pond	19.3594	4.35587	1	56.0742	-115.477	11.354	8.0054	0.007	0.85	DE		165	PP			Kuhn et al. unpublished	Kuhn et al., 2021	Kuhn, M. A., Varner, R. K., Bastviken, D., Crill, P., MacIntyre, S., Turetsky, M., Walter Anthony, K., McGuire, A. D., & Olefeldt, D. (2021). BAWLD-CH&lt;sub&gt;4&lt;/sub&gt;: A comprehensive dataset of methane fluxes from boreal and arctic ecosystems. Earth System Science Data, 13(11), 5151–5189. https://doi.org/10.5194/essd-13-5151-2021
474	U5,Canada	Canada	Small lake and Pond	71.4454	16.0752	1	56.0233	-115.375	43.8384	27.607	0.029	1.5	DE		165	PP			Kuhn et al. unpublished	Kuhn et al., 2021	Kuhn, M. A., Varner, R. K., Bastviken, D., Crill, P., MacIntyre, S., Turetsky, M., Walter Anthony, K., McGuire, A. D., & Olefeldt, D. (2021). BAWLD-CH&lt;sub&gt;4&lt;/sub&gt;: A comprehensive dataset of methane fluxes from boreal and arctic ecosystems. Earth System Science Data, 13(11), 5151–5189. https://doi.org/10.5194/essd-13-5151-2021
475	Valkea-Kotinen, Finland	Finland	Small lake and Pond	3.5348	1.0007	2	61.2365	22.5635	2.5724	1.9248	0.04	8	D		248	T			Huotari et al., 2011; Rinta et al., 2016	Johnson et al 2022	Huotari, J. (2011). Carbon dioxide and methane exchange between a Boreal Pristine Lake and the atmosphere. Ph.D. thesis.; Rinta, P., Bastviken, D., Schilder, J., Van Hardenbroek, M., Stötter, T., & Heiri, O. (2017). Higher late summer methane emission from central than northern European lakes. Journal of Limnology, 76, 52–67.
476	Vault, United States of America	United States of America	Small lake and Pond	207.947	48.7386	1	65.03	-147.7	31.788	176.159	0.003	4.6	DE		178.4	TH			Sepulveda-Jauregui et al. 2015	Johnson et al 2022	Sepulveda-Jauregui A, Walter Anthony KM, Martinez-Cruz K et al. (2015) Methane and carbon dioxide emissions from 40 lakes along a north-south latitudinal transect in Alaska. Biogeosciences, 12, 3197-3223
433	Shuchi, Russia	Russia	Small lake and Pond	104.2	21.2568	1	68.45	161.2	11.8	92.4	0.0487	11	DE		135	TH			Walter Anthony et al. 2010	Johnson et al 2022	Walter Anthony, K. M., Vas, D. A., Brosius, L., Chapin, F. S., Zimov, S. A., & Zhuang, Q. (2010). Estimating methane emissions from northern lakes using ice-bubble surveys. Limnology and Oceanography: Methods, 8(11), 592–609.
45	BLH, China	China	Small lake and Pond	267.6	62.1207	4	34.82	92.92	80.4	187.2			DE		175.2	GP			Wang et al. 2021	this study
479	W1,Canada	Canada	Small lake and Pond	19.8888	3.9877	1	63.151	-123.249	16.7106	3.17815	0.042	3.5	DE		130	PP			Kuhn et al. unpublished	Kuhn et al., 2021	Kuhn, M. A., Varner, R. K., Bastviken, D., Crill, P., MacIntyre, S., Turetsky, M., Walter Anthony, K., McGuire, A. D., & Olefeldt, D. (2021). BAWLD-CH&lt;sub&gt;4&lt;/sub&gt;: A comprehensive dataset of methane fluxes from boreal and arctic ecosystems. Earth System Science Data, 13(11), 5151–5189. https://doi.org/10.5194/essd-13-5151-2021
480	W2,Canada	Canada	Small lake and Pond	34.9809	7.01367	1	63.151	-123.249	20.0336	14.9473	0.01	1.1	DE		130	PP			Kuhn et al. unpublished	Kuhn et al., 2021	Kuhn, M. A., Varner, R. K., Bastviken, D., Crill, P., MacIntyre, S., Turetsky, M., Walter Anthony, K., McGuire, A. D., & Olefeldt, D. (2021). BAWLD-CH&lt;sub&gt;4&lt;/sub&gt;: A comprehensive dataset of methane fluxes from boreal and arctic ecosystems. Earth System Science Data, 13(11), 5151–5189. https://doi.org/10.5194/essd-13-5151-2021
481	W3,Canada	Canada	Small lake and Pond	53.5724	10.7413	1	63.151	-123.249	25.6327	27.9397	0.005	0.8	DE		130	PP			Kuhn et al. unpublished	Kuhn et al., 2021	Kuhn, M. A., Varner, R. K., Bastviken, D., Crill, P., MacIntyre, S., Turetsky, M., Walter Anthony, K., McGuire, A. D., & Olefeldt, D. (2021). BAWLD-CH&lt;sub&gt;4&lt;/sub&gt;: A comprehensive dataset of methane fluxes from boreal and arctic ecosystems. Earth System Science Data, 13(11), 5151–5189. https://doi.org/10.5194/essd-13-5151-2021
482	W4,Canada	Canada	Small lake and Pond	51.7639	10.3787	1	67.3705	-134.856	12.6917	39.0722	0.12	1.75	DE		130	PP			Kuhn et al. unpublished	Kuhn et al., 2021	Kuhn, M. A., Varner, R. K., Bastviken, D., Crill, P., MacIntyre, S., Turetsky, M., Walter Anthony, K., McGuire, A. D., & Olefeldt, D. (2021). BAWLD-CH&lt;sub&gt;4&lt;/sub&gt;: A comprehensive dataset of methane fluxes from boreal and arctic ecosystems. Earth System Science Data, 13(11), 5151–5189. https://doi.org/10.5194/essd-13-5151-2021
483	W5,Canada	Canada	Small lake and Pond	26.1358	5.24023	1	63.151	-123.249	12.5052	13.6306	0.038	1.5	DE		130	PP			Kuhn et al. unpublished	Kuhn et al., 2021	Kuhn, M. A., Varner, R. K., Bastviken, D., Crill, P., MacIntyre, S., Turetsky, M., Walter Anthony, K., McGuire, A. D., & Olefeldt, D. (2021). BAWLD-CH&lt;sub&gt;4&lt;/sub&gt;: A comprehensive dataset of methane fluxes from boreal and arctic ecosystems. Earth System Science Data, 13(11), 5151–5189. https://doi.org/10.5194/essd-13-5151-2021
313	MD, China	China	Small lake and Pond	56.8	13.1856	4	34.92	98.62	30	26.8			DE		175.2	GP			Wang et al. 2021	this study
459	TTH, China	China	Small lake and Pond	127.6	29.6211	4	34.08	92.34	8	119.6			DE		175.2	GP			Wang et al. 2021	this study
484	WDL, China	China	Small lake and Pond	11.56	2.68354	4	35.39	93.5	3.12	8.44			DE		175.2	GP			Wang et al. 2021	this study
325	Misty, United States of America	United States of America	Small lake and Pond	0.368	0.1099	1	42.13	-89.32	0.368		0.057	13.7	D		270.2	T			West et al., 2016	Johnson et al 2022	West, W. E., Creamer, K. P., & Jones, S. E. (2016). Productivity and depth regulate lake contributions to atmospheric methane: Lake productivity fuels methane emissions. Limnology & Oceanography, 61, 1–11.
417	Raspberry, United States of America	United States of America	Small lake and Pond	0.432	0.129012	1	42.13	-89.32	0.432		0.042	6.1	D		270.2	T			West et al., 2016	Johnson et al 2022	West, W. E., Creamer, K. P., & Jones, S. E. (2016). Productivity and depth regulate lake contributions to atmospheric methane: Lake productivity fuels methane emissions. Limnology & Oceanography, 61, 1–11.
489	Yaganto, Russia	Russia	Small lake and Pond	3.5	0.71204	1	64.47	76.58	3.5			3	D		134.2	T			Gal'chenko et al. 2001	Johnson et al 2022	Gal'chenko, V. F., Dulov, L., Cramer, E. B., Konova, N. I., & Barysheva, S. V. (2001). Biogeochemical processes of methane cycle in the soils, bogs, and lakes of Western Siberia. Microbiology, 70, 175–185.
490	Yezhulin, China	China	Small lake and Pond	0.9624	0.227858	2	30.742	113.347	0.9624				D		181.8	T			Xiao et al., 2014	Johnson et al 2022	Xiao S, Liu W, Yang H et al. (2014) Extreme methane bubbling emissions from a subtropical shallow eutrophic pond. Austin Biometrics and Biostatistics, 1, 6.
485	West Long, United States of America	United States of America	Small lake and Pond	0.656	0.195908	1	42.13	-89.32	0.656		0.049	14	D		270.2	T			West et al., 2016	Johnson et al 2022	West, W. E., Creamer, K. P., & Jones, S. E. (2016). Productivity and depth regulate lake contributions to atmospheric methane: Lake productivity fuels methane emissions. Limnology & Oceanography, 61, 1–11.
492	pond Yichang, China	China	Small lake and Pond	593.424	#VALUE!	1	30.742	111.347		593.424			E	Yes	NA	T			Xiao et al., 2014	Johnson et al 2022	Xiao S, Liu W, Yang H et al. (2014) Extreme methane bubbling emissions from a subtropical shallow eutrophic pond. Austin Biometrics and Biostatistics, 1, 6.
82	Beaver pond, United States of America	United States of America	Small lake and Pond	250	73.96	1	39.117	-79.583	250				D		266.2	T			Yavitt et al., 1990	Johnson et al 2022	Yavitt, J. B., Lang, G. E., & Sexstone, A. J. (1990). Methane fluxes in wetland and forest soils, beaver ponds, and low-order streams of a temperate forest ecosystem. Journal of Geophysical Research, 95, 22463–22474
327	Mochou, Antarctica	Antarctica	Small lake and Pond	3.4704	0.813878	1	-69.383	76.333	3.4704				D		178.6	T			Zhu et al., 2010	Johnson et al 2022	Zhu, R. B., Liu, Y. S., Xu, H., Huang, T., Sun, J. J., Ma, E. D., & Sun, L. G. (2010). Carbon dioxide and methane fluxes in the littoral zones of two lakes, East Antarctica. Atmospheric Environment, 44(3), 304–311.
467	Tuanjie, Antarctica	Antarctica	Small lake and Pond	2.6352	0.618007	1	-69.383	76.333	2.6352				D		178.6	T			Zhu et al., 2010	Johnson et al 2022	Zhu, R. B., Liu, Y. S., Xu, H., Huang, T., Sun, J. J., Ma, E. D., & Sun, L. G. (2010). Carbon dioxide and methane fluxes in the littoral zones of two lakes, East Antarctica. Atmospheric Environment, 44(3), 304–311.

## Sheet: lake
No	Name	Country	Ecosystem_type	Lake_type	Methaneflux_mgCH4m2d1	Methaneflux_gch4m2yr1	Aggregrated_flux	Lat	Lon	DiffCH4_Flux	EbCH4_Flux	Area_km2	Depth	Pathway	Exclude ebulition from yearly flux upscaling	Exclude	Icefree_days_BAWLD	Estimated_icefree_days	Trophic_level	Reference	Source	Full ref
236	LKg4,Russia	Russia	Lake	U	NA	0	1	62.3381	74.2383				0.2				141	141		Serikova et al. 2019	Kuhn et al., 2021	Serikova, S., Pokrovsky, O.S., Laudon, H. (2019). High carbon emissions from thermokarst lakes of Western Siberia. Nat Commun 10, 1552
255	BonnieLakeGravelPit, United States of America	United States of America	Lake	GP	0	0	1	64.805	-147.676		0	0.1232	4.9	E		Yes	-	178.4		Engram et al. 2020	Kuhn et al., 2021	Engram, M., Walter Anthony, K.M., Sachs, T. (2020) Author Correction: Remote sensing northern lake methane ebullition. Nat. Clim. Chang. 10, 876
260	Island_wesy, United States of America	United States of America	Lake	T	0	0	1	66.513	-164.326		0	0.0299		E		Yes	-	178.4		Engram et al. 2020	Kuhn et al., 2021	Engram, M., Walter Anthony, K.M., Sachs, T. (2020) Author Correction: Remote sensing northern lake methane ebullition. Nat. Clim. Chang. 10, 876
275	NE1, United States of America	United States of America	Lake	GP	0	0	1	68.644	-149.59		0	0.0128	1.1	E		Yes	-	85.8		Engram et al. 2020	Kuhn et al., 2021	Engram, M., Walter Anthony, K.M., Sachs, T. (2020) Author Correction: Remote sensing northern lake methane ebullition. Nat. Clim. Chang. 10, 876
291	CoffeeLake, United States of America	United States of America	Lake	GP	0	0	1	70.388	-157.391		0	0.2365		E		Yes	-	92.4		Engram et al. 2020	Kuhn et al., 2021	Engram, M., Walter Anthony, K.M., Sachs, T. (2020) Author Correction: Remote sensing northern lake methane ebullition. Nat. Clim. Chang. 10, 876
292	NewLake, United States of America	United States of America	Lake	GP	0	0	1	70.39	-157.409		0	1.4869		E		Yes	-	92.4		Engram et al. 2020	Kuhn et al., 2021	Engram, M., Walter Anthony, K.M., Sachs, T. (2020) Author Correction: Remote sensing northern lake methane ebullition. Nat. Clim. Chang. 10, 876
295	L4_E, United States of America	United States of America	Lake	GP	0	0	1	70.446	-157.438		0	0.0753		E		Yes	-	92.4		Engram et al. 2020	Kuhn et al., 2021	Engram, M., Walter Anthony, K.M., Sachs, T. (2020) Author Correction: Remote sensing northern lake methane ebullition. Nat. Clim. Chang. 10, 876
296	L5_E, United States of America	United States of America	Lake	GP	0	0	1	70.449	-157.434		0	0.5145		E		Yes	-	92.4		Engram et al. 2020	Kuhn et al., 2021	Engram, M., Walter Anthony, K.M., Sachs, T. (2020) Author Correction: Remote sensing northern lake methane ebullition. Nat. Clim. Chang. 10, 876
297	L6_E, United States of America	United States of America	Lake	GP	0	0	1	70.456	-157.45		0	0.5726		E		Yes	-	92.4		Engram et al. 2020	Kuhn et al., 2021	Engram, M., Walter Anthony, K.M., Sachs, T. (2020) Author Correction: Remote sensing northern lake methane ebullition. Nat. Clim. Chang. 10, 876
307	Sukok, United States of America	United States of America	Lake	GP	0	0	1	71.075	-156.82		0	18.1596		E		Yes	-	92.4		Engram et al. 2020	Kuhn et al., 2021	Engram, M., Walter Anthony, K.M., Sachs, T. (2020) Author Correction: Remote sensing northern lake methane ebullition. Nat. Clim. Chang. 10, 876
308	BRW-103, United States of America	United States of America	Lake	T	0	0	1	71.12	-156.317		0	1.798	1.5	E		Yes	90	90		Townsend-Small et al. 2017	Kuhn et al., 2021	Townsend-Small, A., Åkerström, F., Arp, C. D. & Hinkel, K. M. Spatial and Temporal Variation in Methane Concentrations, Fluxes, and Sources in Lakes in Arctic Alaska: Methane in Arctic Alaskan lakes. Journal of Geophysical Research: Biogeosciences 122, 2966–2981 (2017).
178	Baikal, Russia	Russia	Lake	B	0.0069	0.00180656	1	53.5	108	0.0069				D			NA	217.6		Schmid et al., 2007	Johnson et al 2022	Schmid, M., De Batist, M., Granin, N., Kapitanov, V. A., McGinnis, D. F., Mizandrontsev, I. B., et al. (2007). Sources and sinks of methane in Lake Baikal—A synthesis of measurements and modeling. Limnology and Oceanography, 52, 1824–1837. https://doi.org/10.4319/lo.2007.52.5.1824
113	Lake Dix, Switzerland	Switzerland	Lake	B	0.048	0.0130109	1	46.07	7.4	0.048				D			NA	230.8		Diem et al., 2012	Johnson et al 2022	Diem T, Koch S, Schwarzenbach S et al. (2012) Greenhouse gas emissions (CO2, CH4, and N2O) from several perialpine and alpine hydropower reservoirs by diffusion and loss in turbines. Aquatic Sciences, 74, 619-635.
311	BRW-106, United States of America	United States of America	Lake	T	0.08	0.0138	1	71.18	-156.897	0.08	0	3.632	1.4	DE			90	90		Townsend-Small et al. 2017	Kuhn et al., 2021	Townsend-Small, A., Åkerström, F., Arp, C. D. & Hinkel, K. M. Spatial and Temporal Variation in Methane Concentrations, Fluxes, and Sources in Lakes in Arctic Alaska: Methane in Arctic Alaskan lakes. Journal of Geophysical Research: Biogeosciences 122, 2966–2981 (2017).
112	Trout, United States of America	United States of America	Lake	T	0.0711	0.0192325	1	46.033	-89.667	0.0711				D			NA	230		Michmerhuizen et al., 1996	Johnson et al 2022	Michmerhuizen, C. M., Striegl, R. G., & McDonald, M. E. (1996). Potential methane emission from north-temperate lakes following ice melt. Limnology & Oceanography, 41(5), 985–991
119	Lake Zeuzier, Switzerland	Switzerland	Lake	T	0.0648	0.023652	1	46.35	7.43	0.0648				D			NA	365		Diem et al., 2012	Johnson et al 2022	Diem T, Koch S, Schwarzenbach S et al. (2012) Greenhouse gas emissions (CO2, CH4, and N2O) from several perialpine and alpine hydropower reservoirs by diffusion and loss in turbines. Aquatic Sciences, 74, 619-635.
319	Lake Hazen, Canada	Canada	Lake	B	0.17185	0.023894	2	81.8	-71.4	0.17185				D			NA	42.2		Emmerton et al., 2014; Emmerton et al., 2016	Johnson et al 2022	Emmerton, C. A., Louis, V. L. S., Lehnherr, I., Humphreys, E. R., Rydz, E., & Kosolofski, H. R. (2014). The net exchange of methane with high Arctic landscapes during the summer growing season. Biogeosciences, 11, 3095–3106. https://doi.org/10.5194/bg-11-3095-2014 ; Emmerton, C. A., Louis, V. L. S., Lehnherr, I., Graydon, J. A., Kirk, J. L., & Rondeau, K. J. (2016). The importance of freshwater s…
293	L3_E, United States of America	United States of America	Lake	GP	0.14	0.0243852	1	70.414	-157.403		0.14	2.5282		E		Yes	-	92.4		Engram et al. 2020	Kuhn et al., 2021	Engram, M., Walter Anthony, K.M., Sachs, T. (2020) Author Correction: Remote sensing northern lake methane ebullition. Nat. Clim. Chang. 10, 876
290	Lake Qalluuraq, United States of America	United States of America	Lake	GP	0.24	0.0418032	1	70.381	-157.338		0.24	0.9587	2.3	E		Yes	-	92.4		Engram et al. 2020	Kuhn et al., 2021	Engram, M., Walter Anthony, K.M., Sachs, T. (2020) Author Correction: Remote sensing northern lake methane ebullition. Nat. Clim. Chang. 10, 876
91	Nokomis, United States of America	United States of America	Lake	T	0.16	0.0438624	1	44.9	-93.233	0.16				D			NA	235.2		Michmerhuizen et al., 1996	Johnson et al 2022	Michmerhuizen, C. M., Striegl, R. G., & McDonald, M. E. (1996). Potential methane emission from north-temperate lakes following ice melt. Limnology & Oceanography, 41(5), 985–991
102	Lake Luzzone, Italy	Italy	Lake	B	0.1308	0.047742	1	45.57	8.97	0.1308				D			NA	365		Diem et al., 2012	Johnson et al 2022	Diem T, Koch S, Schwarzenbach S et al. (2012) Greenhouse gas emissions (CO2, CH4, and N2O) from several perialpine and alpine hydropower reservoirs by diffusion and loss in turbines. Aquatic Sciences, 74, 619-635.
127	Lake Lungern, Switzerland	Switzerland	Lake	T	0.1336	0.048764	1	46.8	8.17	0.1336				D			NA	365		Diem et al., 2012	Johnson et al 2022	Diem T, Koch S, Schwarzenbach S et al. (2012) Greenhouse gas emissions (CO2, CH4, and N2O) from several perialpine and alpine hydropower reservoirs by diffusion and loss in turbines. Aquatic Sciences, 74, 619-635.
123	Lake Gruye`re, Switzerland	Switzerland	Lake	T	0.152	0.05548	1	46.65	7.1	0.152				D			NA	365		Diem et al., 2012	Johnson et al 2022	Diem T, Koch S, Schwarzenbach S et al. (2012) Greenhouse gas emissions (CO2, CH4, and N2O) from several perialpine and alpine hydropower reservoirs by diffusion and loss in turbines. Aquatic Sciences, 74, 619-635.
46	Dogze Co Lake, Tibetan Plateau, China	China	Lake	GP	0.32	0.0566784	1	31.8167	87.5167					D			NA	96.6		Yan et al. 2018	Zheng et al., 2022	Yan F, Sillanpää M, Kang S et al. (2018) Lakes on the Tibetan Plateau as conduits of greenhouse gases to the atmosphere. Journal of Geophysical Research: Biogeosciences, 123, 2091-2103.
256	ViewLake Gravel Pit, United States of America	United States of America	Lake	GP	0.25	0.058595	1	64.806	-147.672		0.25	0.2682	15.5	E		Yes	-	178.4		Engram et al. 2020	Kuhn et al., 2021	Engram, M., Walter Anthony, K.M., Sachs, T. (2020) Author Correction: Remote sensing northern lake methane ebullition. Nat. Clim. Chang. 10, 876
180	La Grande 4, Canada	Canada	Lake	B	0.3	0.063594	1	54.07	-72.84	0.3				D			NA	146.4		Tremblay et al., 2005	Johnson et al 2022	Tremblay, A., Therrien, J., Hamlin, B., Wichmann, E., & LeDrew, L. J. (2005). Greenhouse gas emissions—Fluxes and processes hydroelectric reservoirs and natural environments. In A. Tremblay, L. Varfalvy, C. Roehm, & M. Garneau (Eds.), (pp. 209–232). Springer.
169	Clarkie, Canada	Canada	Lake	B	0.304	0.0725283	1	52.23	-75.47	0.304				D			NA	184.4		Demarty et al., 2011	Johnson et al 2022	Demarty, M., & Bastien, J. (2011). GHG emissions from hydroelectric reservoirs in tropical and equatorial regions: Review of 20 years of CH4 emission measurements. Energy Policy, 39, 4197–4206. https://doi.org/10.1016/j.enpol.2011.04.033
92	Harriet, United States of America	United States of America	Lake	T	0.2667	0.0731131	1	44.917	-93.3	0.2667				D			NA	235.2		Michmerhuizen et al., 1996	Johnson et al 2022	Michmerhuizen, C. M., Striegl, R. G., & McDonald, M. E. (1996). Potential methane emission from north-temperate lakes following ice melt. Limnology & Oceanography, 41(5), 985–991
152	Snowbank, United States of America	United States of America	Lake	B	0.2844	0.0739838	1	48	-91.417	0.2844				D			NA	215.2		Michmerhuizen et al., 1996	Johnson et al 2022	Michmerhuizen, C. M., Striegl, R. G., & McDonald, M. E. (1996). Potential methane emission from north-temperate lakes following ice melt. Limnology & Oceanography, 41(5), 985–991
120	Lake Oberaar, Switzerland	Switzerland	Lake	B	0.276	0.075199	1	46.55	8.27	0.276				D			NA	232.8		Diem et al., 2012	Johnson et al 2022	Diem T, Koch S, Schwarzenbach S et al. (2012) Greenhouse gas emissions (CO2, CH4, and N2O) from several perialpine and alpine hydropower reservoirs by diffusion and loss in turbines. Aquatic Sciences, 74, 619-635.
137	Lake Sihl, Switzerland	Switzerland	Lake	T	0.2072	0.075628	1	47.13	8.8	0.2072				D			NA	365		Diem et al., 2012	Johnson et al 2022	Diem T, Koch S, Schwarzenbach S et al. (2012) Greenhouse gas emissions (CO2, CH4, and N2O) from several perialpine and alpine hydropower reservoirs by diffusion and loss in turbines. Aquatic Sciences, 74, 619-635.
302	LMR-400, United States of America	United States of America	Lake	T	0.46	0.07935	1	70.75	-156.72	0.46		2.523	1	D			90	90		Townsend-Small et al. 2017	Kuhn et al., 2021	Townsend-Small, A., Åkerström, F., Arp, C. D. & Hinkel, K. M. Spatial and Temporal Variation in Methane Concentrations, Fluxes, and Sources in Lakes in Arctic Alaska: Methane in Arctic Alaskan lakes. Journal of Geophysical Research: Biogeosciences 122, 2966–2981 (2017).
247	LKh3,Russia	Russia	Lake	GP	0.41	0.084214	1	63.8056	75.7428	0.41		0.020497	0.8	D			137	137		Serikova et al. 2019	Kuhn et al., 2021	Serikova, S., Pokrovsky, O.S., Laudon, H. (2019). High carbon emissions from thermokarst lakes of Western Siberia. Nat Commun 10, 1552
53	Chabo Co Lake, Tibetan Plateau, China	China	Lake	GP	0.48	0.0852192	1	33.3	84.1833					D			NA	97.2		Yan et al. 2018	Zheng et al., 2022	Yan F, Sillanpää M, Kang S et al. (2018) Lakes on the Tibetan Plateau as conduits of greenhouse gases to the atmosphere. Journal of Geophysical Research: Biogeosciences, 123, 2091-2103.
121	Lake Grimsel, Switzerland	Switzerland	Lake	T	0.3664	0.0998293	1	46.57	8.33	0.3664				D			NA	232.8		Diem et al., 2012	Johnson et al 2022	Diem T, Koch S, Schwarzenbach S et al. (2012) Greenhouse gas emissions (CO2, CH4, and N2O) from several perialpine and alpine hydropower reservoirs by diffusion and loss in turbines. Aquatic Sciences, 74, 619-635.
167	Mistumis, Canada	Canada	Lake	B	0.424	0.101158	1	52.16	-76.16	0.424				D			NA	184.4		Demarty et al., 2011	Johnson et al 2022	Demarty, M., & Bastien, J. (2011). GHG emissions from hydroelectric reservoirs in tropical and equatorial regions: Review of 20 years of CH4 emission measurements. Energy Policy, 39, 4197–4206. https://doi.org/10.1016/j.enpol.2011.04.033
184	Laforge 1, Canada	Canada	Lake	B	0.5	0.10599	1	54.27	-72.45	0.5				D			NA	146.4		Tremblay et al., 2005	Johnson et al 2022	Tremblay, A., Therrien, J., Hamlin, B., Wichmann, E., & LeDrew, L. J. (2005). Greenhouse gas emissions—Fluxes and processes hydroelectric reservoirs and natural environments. In A. Tremblay, L. Varfalvy, C. Roehm, & M. Garneau (Eds.), (pp. 209–232). Springer.
54	Hongze Lake, China	China	Lake	T	0.456	0.106367	1	33.329	118.644	0.456				D			NA	176.8		Chen et al., 2006	Johnson et al 2022	Chen, Y., Li, X., Hu, Z., Liu, W., & Hu, W. (2006). Carbon dioxide flux on the water-air interface of the eight Lakes in China in winter (in Chinese). Ecology and Environment, 15, 665–669.
95	Calhoun, United States of America	United States of America	Lake	T	0.4089	0.112096	1	44.95	-93.3	0.4089				D			NA	235.2		Michmerhuizen et al., 1996	Johnson et al 2022	Michmerhuizen, C. M., Striegl, R. G., & McDonald, M. E. (1996). Potential methane emission from north-temperate lakes following ice melt. Limnology & Oceanography, 41(5), 985–991
43	Dangreyong Co Lake, Tibetan Plateau, China	China	Lake	GP	0.64	0.113357	1	31.25	86.6167					D			NA	96.6		Yan et al. 2018	Zheng et al., 2022	Yan F, Sillanpää M, Kang S et al. (2018) Lakes on the Tibetan Plateau as conduits of greenhouse gases to the atmosphere. Journal of Geophysical Research: Biogeosciences, 123, 2091-2103.
48	Serling Co Lake, Tibetan Plateau, China	China	Lake	GP	0.64	0.113357	1	32.1	89					D			NA	96.6		Yan et al. 2018	Zheng et al., 2022	Yan F, Sillanpää M, Kang S et al. (2018) Lakes on the Tibetan Plateau as conduits of greenhouse gases to the atmosphere. Journal of Geophysical Research: Biogeosciences, 123, 2091-2103.
122	Lake Santa Maria, Switzerland	Switzerland	Lake	B	0.42	0.114433	1	46.57	8.8	0.42				D			NA	232.8		Diem et al., 2012	Johnson et al 2022	Diem T, Koch S, Schwarzenbach S et al. (2012) Greenhouse gas emissions (CO2, CH4, and N2O) from several perialpine and alpine hydropower reservoirs by diffusion and loss in turbines. Aquatic Sciences, 74, 619-635.
106	Lugano, Switzerland	Switzerland	Lake	B	0.4268	0.115688	5	45.983	8.967	0.4268				D			NA	230.8		Blees et al., 2015	Johnson et al 2022	Blees, J., Niemann, H., Erne, M., Zopfi, J., Schubert, C. J., & Lehmann, M. F. (2015). Spatial variations in surface water methane super-saturation and emission in Lake Lugano, Southern Switzerland. Aquatic Sciences, 77, 535–545. https://doi.org/10.1007/s00027-015-0401-z
284	ATQ-202, United States of America	United States of America	Lake	T	0.69	0.119025	1	70.29	-156.985	0.69	0	1.488	1.2	DE			90	90		Townsend-Small et al. 2017	Kuhn et al., 2021	Townsend-Small, A., Åkerström, F., Arp, C. D. & Hinkel, K. M. Spatial and Temporal Variation in Methane Concentrations, Fluxes, and Sources in Lakes in Arctic Alaska: Methane in Arctic Alaskan lakes. Journal of Geophysical Research: Biogeosciences 122, 2966–2981 (2017).
45	Chao Lake, China	China	Lake	T	0.504	0.119327	1	31.596	117.406	0.504				D			NA	181.8		Chen et al., 2006	Johnson et al 2022	Chen, Y., Li, X., Hu, Z., Liu, W., & Hu, W. (2006). Carbon dioxide flux on the water-air interface of the eight Lakes in China in winter (in Chinese). Ecology and Environment, 15, 665–669.
117	Lake Brock, Québec, Canada	Canada	Lake	GP	0.496	0.13639	1	46.2667	-76.3333					D			NA	236.4		Ouellet et al. 2012	Zheng et al., 2022	Ouellet A, Lalonde K, Plouhinec JB et al. (2012) Assessing carbon dynamics in natural and perturbed boreal aquatic systems. Journal of Geophysical Research: Biogeosciences, 117, G03024
289	ATQ-205, United States of America	United States of America	Lake	T	1	0.1725	1	70.38	-156.927	1		1.509	1	D			90	90		Townsend-Small et al. 2017	Kuhn et al., 2021	Townsend-Small, A., Åkerström, F., Arp, C. D. & Hinkel, K. M. Spatial and Temporal Variation in Methane Concentrations, Fluxes, and Sources in Lakes in Arctic Alaska: Methane in Arctic Alaskan lakes. Journal of Geophysical Research: Biogeosciences 122, 2966–2981 (2017).
207	Bisen/S7, Sweden	Sweden	Lake	GP	0.689	0.177886	1	59.96	15.508	0.689		0.433		D			NA	212.4		Bastviken et al., 2004	Johnson et al 2022	Bastviken, D., Cole, J., Pace, M. & Tranvik, L. Methane emissions from lakes: Dependence of lake characteristics, two regional assessments, and a global estimate. Global Biogeochemical Cycles 18, (2004).
188	Fiolen/S7, Sweden	Sweden	Lake	GP	0.5204	0.183535	1	57.083	14.533	0.5204		1.5		D			NA	347.4		Bastviken et al., 2004	Johnson et al 2022	Bastviken, D., Cole, J., Pace, M. & Tranvik, L. Methane emissions from lakes: Dependence of lake characteristics, two regional assessments, and a global estimate. Global Biogeochemical Cycles 18, (2004).
66	Big Soda Lake, Nevada, United States of America	United States of America	Lake	T	0.6464	0.185982	1	39.53	-118.87	0.6464				D			NA	254.6		Miller and Oremland. 1988	Johnson et al 2022	Miller, L. G., & Oremland, R. S. (1988). Methane efflux from the pelagic regions of four lakes. Global Biogeochemical Cycles, 2, 269–277. https://doi.org/10.1029/GB002i003p00269
57	Nansi Lake, China	China	Lake	T	0.816	0.19034	1	34.655	117.273	0.816				D			NA	176.8		Chen et al., 2006	Johnson et al 2022	Chen, Y., Li, X., Hu, Z., Liu, W., & Hu, W. (2006). Carbon dioxide flux on the water-air interface of the eight Lakes in China in winter (in Chinese). Ecology and Environment, 15, 665–669.
31	Lake Fuxian, China	China	Lake	T	0.556	0.20294	3	24.5474	102.882	0.288		2.025e-05	0.28	D			NA	365		Chen et al., 2006; Li et al. 2020	Johnson et al 2022; Zheng et al., 2022	Chen, Y., Li, X., Hu, Z., Liu, W., & Hu, W. (2006). Carbon dioxide flux on the water-air interface of the eight Lakes in China in winter (in Chinese). Ecology and Environment, 15, 665–669.
280	RDC-306, United States of America	United States of America	Lake	T	1.31	0.225975	1	70	-156.53	1.31		0.447	1.5	D			90	90		Townsend-Small et al. 2017	Kuhn et al., 2021	Townsend-Small, A., Åkerström, F., Arp, C. D. & Hinkel, K. M. Spatial and Temporal Variation in Methane Concentrations, Fluxes, and Sources in Lakes in Arctic Alaska: Methane in Arctic Alaskan lakes. Journal of Geophysical Research: Biogeosciences 122, 2966–2981 (2017).
198	Mårn, Sweden	Sweden	Lake	T	0.6416	0.227088	1	58.59	15.87	0.6416	0	0.3325	15	DE			NA	349.2	Eutrophic	Rinta et al., 2016	Johnson et al 2022	Rinta, P., Bastviken, D., Schilder, J., Van Hardenbroek, M., Stötter, T., & Heiri, O. (2017). Higher late summer methane emission from central than northern European lakes. Journal of Limnology, 76, 52–67.
205	Lilla Sången, Sweden	Sweden	Lake	GP	0.8959	0.251748	2	59.9015	15.393	0.8959		0.24		D			245	245		Bastviken et al., 2004; Van Hardenbroek et al., 2012	Johnson et al 2022	Bastviken, D., Cole, J., Pace, M. & Tranvik, L. Methane emissions from lakes: Dependence of lake characteristics, two regional assessments, and a global estimate. Global Biogeochemical Cycles 18, (2004).; van Hardenbroek, M., Lotter, A. F., Bastviken, D., Duc, N. T., & Heiri, O. (2012). Relationship between δ13C of chironomid remains and methane flux in Swedish lakes. Freshwater Biology, 57, 166–…
79	Lake Erie, United States of America	United States of America	Lake	T	0.8275	0.25396	4	42	-81	0.8275				D			NA	282		Fernandez et al. 2020	this study	Fernandez,J.M., Townsend-Small,A., Zastepa,A., Watson,S.B., Brandes,J.A. (2020). Methane and nitrous oxide measured throughout Lake Erie over all seasons indicate highest emissions from the eutrophic Western Basin, Journal of Great Lakes Research, 46 (6)
313	BRW-130, United States of America	United States of America	Lake	T	1.48	0.2553	1	71.2	-156.665	1.48	0	2.968	1.2	DE			90	90		Townsend-Small et al. 2017	Kuhn et al., 2021	Townsend-Small, A., Åkerström, F., Arp, C. D. & Hinkel, K. M. Spatial and Temporal Variation in Methane Concentrations, Fluxes, and Sources in Lakes in Arctic Alaska: Methane in Arctic Alaskan lakes. Journal of Geophysical Research: Biogeosciences 122, 2966–2981 (2017).
50	Nieer Co Lake, Tibetan Plateau, China	China	Lake	GP	1.44	0.255658	1	32.2167	82.2333					D			NA	97.2		Yan et al. 2018	Zheng et al., 2022	Yan F, Sillanpää M, Kang S et al. (2018) Lakes on the Tibetan Plateau as conduits of greenhouse gases to the atmosphere. Journal of Geophysical Research: Biogeosciences, 123, 2091-2103.
80	Bergner, United States of America	United States of America	Lake	T	0.864	0.258025	1	42.13	-89.32	0.864		0.162	12	D			NA	270.2		West et al., 2016	Johnson et al 2022	West, W. E., Creamer, K. P., & Jones, S. E. (2016). Productivity and depth regulate lake contributions to atmospheric methane: Lake productivity fuels methane emissions. Limnology & Oceanography, 61, 1–11. https://doi.org/10.1002/lno.10247
94	Minnetonka, United States of America	United States of America	Lake	T	0.9422	0.264626	1	44.917	-93.583	0.9422				D			NA	244.8		Michmerhuizen et al., 1996	Johnson et al 2022	Michmerhuizen, C. M., Striegl, R. G., & McDonald, M. E. (1996). Potential methane emission from north-temperate lakes following ice melt. Limnology & Oceanography, 41(5), 985–991
312	BRW-104, United States of America	United States of America	Lake	T	517.44	0.26565	1	71.19	-156.502	1.54	515.9	1.745	1.1	DE	Yes		90	90		Townsend-Small et al. 2017	Kuhn et al., 2021	Townsend-Small, A., Åkerström, F., Arp, C. D. & Hinkel, K. M. Spatial and Temporal Variation in Methane Concentrations, Fluxes, and Sources in Lakes in Arctic Alaska: Methane in Arctic Alaskan lakes. Journal of Geophysical Research: Biogeosciences 122, 2966–2981 (2017).
192	Skärhultssjön/S7, Sweden	Sweden	Lake	GP	1.0976	0.308426	1	57.163	14.51	1.0976		0.292		D			245	245		Bastviken et al., 2004	Johnson et al 2022	Bastviken, D., Cole, J., Pace, M. & Tranvik, L. Methane emissions from lakes: Dependence of lake characteristics, two regional assessments, and a global estimate. Global Biogeochemical Cycles 18, (2004).
49	Dong Co Lake, Tibetan Plateau, China	China	Lake	GP	1.76	0.31247	1	32.15	84.7					D			NA	97.2		Yan et al. 2018	Zheng et al., 2022	Yan F, Sillanpää M, Kang S et al. (2018) Lakes on the Tibetan Plateau as conduits of greenhouse gases to the atmosphere. Journal of Geophysical Research: Biogeosciences, 123, 2091-2103.
149	Jasper, United States of America	United States of America	Lake	T	1.2089	0.314483	1	47.967	-91.55	1.2089				D			NA	215.2		Michmerhuizen et al., 1996	Johnson et al 2022	Michmerhuizen, C. M., Striegl, R. G., & McDonald, M. E. (1996). Potential methane emission from north-temperate lakes following ice melt. Limnology & Oceanography, 41(5), 985–991
3	Rolleston, Australia	Australia	Lake	T	0.875	0.319375	1	-41.933	145.62	0.875				D			NA	365		Bastien et al., 2013	Johnson et al 2022	Bastien, J., & Demarty, M. (2013). Spatio-temporal variation of gross CO2 and CH4diffusive emissions from Australian reservoirs and natural aquatic ecosystems, and estimation of net reservoir emissions. Lakes and Reservoirs: Research and Management, 18, 115–127. https://doi.org/10.1111/lre.12028
62	Nojiri, Japan	Japan	Lake	T	0.8796	0.321054	1	36.82	138.22	0.8796				D			NA	365		Utsumi et al., 1998	Johnson et al 2022	Utsumi, M., Nojiri, Y., Nakamura, T., Nozawa, T., Otsuki, A., & Seki, H. (1998). Oxidation of dissolved methane in a eutrophic, shallowlake:Lake Kasumigaura, Japan. Limnology and Oceanography, 43(3), 471–490.
218	Lake Pääjärvi, Finland	Finland	Lake	T	1.36778	0.348921	5	61.067	25.133	1.36778		13.4	87	D			NA	208		Linnaluoma 2012; López Bellido et al., 2009; Ojala et al., 2011	Johnson et al 2022	Linnaluoma, J. (2012). Factors controlling carbon gas fluxes in Boreal lakes. Academic dissertation in environmental Ecology, Department of Environment Science, Aquatic Science (pp. 1–73). University of Helsinki.; López Bellido, J., Tulonen, T., Kankaala, P., & Ojala, A. (2009). CO2 and CH4 fluxes during spring and autumn mixing periods in a Boreal lake (Pääjärvi, Southern Finland). Journal of Ge…
157	Outrarctic 4, Canada	Canada	Lake	B	1.408	0.3647	1	50.17	-69	1.408				D			NA	213.6		Tremblay et al., 2005	Johnson et al 2022	Tremblay, A., Therrien, J., Hamlin, B., Wichmann, E., & LeDrew, L. J. (2005). Greenhouse gas emissions—Fluxes and processes hydroelectric reservoirs and natural environments. In A. Tremblay, L. Varfalvy, C. Roehm, & M. Garneau (Eds.), (pp. 209–232). Springer.
315	Ikroavik, United States of America	United States of America	Lake	TH	2.185	0.380583	2	71.2385	-161.135		2.185	5.2388	2.3	E		Yes	-	92.4		Walter Anthony and Anthony 2013; Engram et al. 2020	Johnson et al 2022; Kuhn et al., 2021	Walter Anthony, K. M., & Anthony, P. (2013). Constraining spatial variability of methane ebullition seeps in thermokarst lakes using point process models. Journal of Geophysical Research: Biogeosciences, 118, 1015–1034
33	Erhai Lake, China	China	Lake	T	1.056	0.38544	1	25.702	100.252	1.056				D			NA	365		Chen et al., 2006	Johnson et al 2022	Chen, Y., Li, X., Hu, Z., Liu, W., & Hu, W. (2006). Carbon dioxide flux on the water-air interface of the eight Lakes in China in winter (in Chinese). Ecology and Environment, 15, 665–669.
259	Owl, United States of America	United States of America	Lake	T	1.67	0.391415	1	66.505	-164.247		1.67	0.6298	3.5	E		Yes	-	178.4		Engram et al. 2020	Kuhn et al., 2021	Engram, M., Walter Anthony, K.M., Sachs, T. (2020) Author Correction: Remote sensing northern lake methane ebullition. Nat. Clim. Chang. 10, 876
18	Kivu, Democratic Republic of the Congo	Democratic Republic of the Congo	Lake	T	1.14082	0.416401	7	-1.988	29.134	1.14082				D			NA	365		Borges et al., 2011	Johnson et al 2022	Borges, A. V., Abril, G., Delille, B., Descy, J.-P., & Darchambeau, F. (2011). Diffusive methane emissions to the atmosphere from Lake Kivu (Eastern Africa). Journal of Geophysical Research, 116, G03032. https://doi.org/10.1029/2011JG001673
294	ATQ-206, United States of America	United States of America	Lake	T	2.44	0.4209	1	70.42	-156.981	2.44		1.831	1.2	D			90	90		Townsend-Small et al. 2017	Kuhn et al., 2021	Townsend-Small, A., Åkerström, F., Arp, C. D. & Hinkel, K. M. Spatial and Temporal Variation in Methane Concentrations, Fluxes, and Sources in Lakes in Arctic Alaska: Methane in Arctic Alaskan lakes. Journal of Geophysical Research: Biogeosciences 122, 2966–2981 (2017).
133	Leech, United States of America	United States of America	Lake	T	1.6178	0.424931	1	47	-94	1.6178				D			NA	218.8		Michmerhuizen et al., 1996	Johnson et al 2022	Michmerhuizen, C. M., Striegl, R. G., & McDonald, M. E. (1996). Potential methane emission from north-temperate lakes following ice melt. Limnology & Oceanography, 41(5), 985–991
110	Big Muskellunge, United States of America	United States of America	Lake	T	1.6533	0.444209	1	46.017	-89.617	1.6533				D			NA	227.4		Michmerhuizen et al., 1996	Johnson et al 2022	Michmerhuizen, C. M., Striegl, R. G., & McDonald, M. E. (1996). Potential methane emission from north-temperate lakes following ice melt. Limnology & Oceanography, 41(5), 985–991
276	NE14, United States of America	United States of America	Lake	GP	2.62	0.444247	1	68.677	-149.625		2.62	0.2081		E		Yes	-	85.8		Engram et al. 2020	Kuhn et al., 2021	Engram, M., Walter Anthony, K.M., Sachs, T. (2020) Author Correction: Remote sensing northern lake methane ebullition. Nat. Clim. Chang. 10, 876
42	Zhari Nam Co Lake, Tibetan Plateau, China	China	Lake	GP	2.56	0.454502	1	31.0667	85.4					D			NA	97.2		Yan et al. 2018	Zheng et al., 2022	Yan F, Sillanpää M, Kang S et al. (2018) Lakes on the Tibetan Plateau as conduits of greenhouse gases to the atmosphere. Journal of Geophysical Research: Biogeosciences, 123, 2091-2103.
273	E5, United States of America	United States of America	Lake	GP	2.7	0.457812	2	68.5115	-149.409		2.7	1e-05		E		Yes	-	85.8		Walter Anthony et al. 2010; Engram et al. 2020	Johnson et al 2022; Kuhn et al., 2021	Walter Anthony, K. M., Vas, D. A., Brosius, L., Chapin, F. S., Zimov, S. A., & Zhuang, Q.(2010). Estimating methane emissions from northern lakes using ice-bubble surveys. Limnology and Oceanography: Methods, 8(11), 592–609. https://doi.org/10.4319/lom.2010.8.0592
303	LMR-403, United States of America	United States of America	Lake	T	2.73	0.470925	1	70.78	-156.668	2.73	0	1.681	1.1	DE			90	90		Townsend-Small et al. 2017	Kuhn et al., 2021	Townsend-Small, A., Åkerström, F., Arp, C. D. & Hinkel, K. M. Spatial and Temporal Variation in Methane Concentrations, Fluxes, and Sources in Lakes in Arctic Alaska: Methane in Arctic Alaskan lakes. Journal of Geophysical Research: Biogeosciences 122, 2966–2981 (2017).
86	Crystal, United States of America	United States of America	Lake	T	1.6	0.481408	2	44.117	-88.987	1.6				D			NA	273.4		Riera et al., 1999; Michmerhuizen et al., 1996	Johnson et al 2022	Riera, J. L., Schindler, J. E., & Kratz, T. K. (1999). Seasonal dynamics of carbon dioxide and methane in two clear-water lakes and two bog lakes in Northern Wisconsin, U.S.A. Canadian Journal of Fisheries and Aquatic Sciences, 56(2) ; Michmerhuizen, C. M., Striegl, R. G., & McDonald, M. E. (1996). Potential methane emission from north-temperate lakes following ice melt. Limnology & Oceanography,…
20	Grand-Lahou, Ivory Coast	Ivory Coast	Lake	TR	1.32	0.4818	2	5.208	-5.23	1.32				D			NA	365		Koné et al., 2008; Koné et al., 2010	Johnson et al 2022	Koné YJM, Abril G, Delille B et al. (2010) Seasonal variability of methane in the rivers and lagoons of Ivory Coast (West Africa). Biogeochemistry, 100, 21-37.
213	Abandoned Cabin, United States of America	United States of America	Lake	GP	2.094	0.490792	1	60.7	-151.32		2.094			E		Yes	-	178.4		Sepulveda-Jauregui et al. 2015	Johnson et al 2022	Sepulveda-Jauregui, A., Walter Anthony, K. M., Martinez-Cruz, K., Greene, S., & Thalasso, F. (2015). Methane and carbon dioxide emissions from 40 lakes along a north-south latitudinal transect in Alaska. Biogeosciences, 12(11), 3197–3223. https://doi.org/10.5194/bg-12-3197-2015
4	Selina, Australia	Australia	Lake	T	1.3852	0.505598	1	-41.885	145.612	1.3852				D			NA	365		Bastien et al., 2013	Johnson et al 2022	Bastien, J., & Demarty, M. (2013). Spatio-temporal variation of gross CO2 and CH4diffusive emissions from Australian reservoirs and natural aquatic ecosystems, and estimation of net reservoir emissions. Lakes and Reservoirs: Research and Management, 18, 115–127. https://doi.org/10.1111/lre.12028
201	Grissjön, Sweden	Sweden	Lake	T	1.4436	0.510948	1	58.77	15.14	1.2832	0.1604	0.23	16	DE			NA	349.2	Mesotrophic	Rinta et al., 2016	Johnson et al 2022	Rinta, P., Bastviken, D., Schilder, J., Van Hardenbroek, M., Stötter, T., & Heiri, O. (2017). Higher late summer methane emission from central than northern European lakes. Journal of Limnology, 76, 52–67.
285	Aeolian Sand, United States of America	United States of America	Lake	T	2.67	0.516645	1	70.3	-156.9	2.67		1.99712	1.84182	D			120	120		Elder et al. 2018	Kuhn et al., 2021	Elder, C.D., Xu, X., Walker, J. (2018) Greenhouse gas emissions from diverse Arctic Alaskan lakes are dominated by young carbon. Nature Clim Change 8, 166–171
288	ATQ-204, United States of America	United States of America	Lake	T	3.02	0.52095	1	70.37	-156.963	3.02		0.403	0.9	D			90	90		Townsend-Small et al. 2017	Kuhn et al., 2021	Townsend-Small, A., Åkerström, F., Arp, C. D. & Hinkel, K. M. Spatial and Temporal Variation in Methane Concentrations, Fluxes, and Sources in Lakes in Arctic Alaska: Methane in Arctic Alaskan lakes. Journal of Geophysical Research: Biogeosciences 122, 2966–2981 (2017).
248	LKh1,Russia	Russia	Lake	GP	2.544	0.522538	1	63.8058	75.6519	2.544		0.016921	0.425	D			137	137		Serikova et al. 2019	Kuhn et al., 2021	Serikova, S., Pokrovsky, O.S., Laudon, H. (2019). High carbon emissions from thermokarst lakes of Western Siberia. Nat Commun 10, 1552
251	LKh19,Russia	Russia	Lake	PP	2.546	0.522948	1	63.8258	75.5928	2.546		0.570756	0.6	D			137	137		Serikova et al. 2019	Kuhn et al., 2021	Serikova, S., Pokrovsky, O.S., Laudon, H. (2019). High carbon emissions from thermokarst lakes of Western Siberia. Nat Commun 10, 1552
51	Norma Tso Lake, Tibetan Plateau, China	China	Lake	GP	3.04	0.538445	1	32.3167	87.95					D			NA	96.6		Yan et al. 2018	Zheng et al., 2022	Yan F, Sillanpää M, Kang S et al. (2018) Lakes on the Tibetan Plateau as conduits of greenhouse gases to the atmosphere. Journal of Geophysical Research: Biogeosciences, 123, 2091-2103.
114	Lake Clair, Québec, Canada	Canada	Lake	GP	1.968	0.541161	1	46.1833	-76.4					D			NA	236.4		Ouellet et al. 2012	Zheng et al., 2022	Ouellet A, Lalonde K, Plouhinec JB et al. (2012) Assessing carbon dynamics in natural and perturbed boreal aquatic systems. Journal of Geophysical Research: Biogeosciences, 117, G03024
230	LKg14,Russia	Russia	Lake	GP	2.61	0.543402	1	62.2522	74.2958	2.61		0.080767	0.975	D			141	141		Serikova et al. 2019	Kuhn et al., 2021	Serikova, S., Pokrovsky, O.S., Laudon, H. (2019). High carbon emissions from thermokarst lakes of Western Siberia. Nat Commun 10, 1552
111	Allequash, United States of America	United States of America	Lake	T	2.0444	0.547	1	46.033	-89.617	2.0444				D			NA	225.8		Michmerhuizen et al., 1996	Johnson et al 2022	Michmerhuizen, C. M., Striegl, R. G., & McDonald, M. E. (1996). Potential methane emission from north-temperate lakes following ice melt. Limnology & Oceanography, 41(5), 985–991
231	LKg13,Russia	Russia	Lake	GP	2.671	0.556102	1	62.255	74.3108	2.671		0.019298	1.4	D			141	141		Serikova et al. 2019	Kuhn et al., 2021	Serikova, S., Pokrovsky, O.S., Laudon, H. (2019). High carbon emissions from thermokarst lakes of Western Siberia. Nat Commun 10, 1552
132	Lake Wohlen, Switzerland	Switzerland	Lake	T	1.524	0.55626	1	46.97	7.37	1.524				D			NA	365		Diem et al., 2012	Johnson et al 2022	Diem T, Koch S, Schwarzenbach S et al. (2012) Greenhouse gas emissions (CO2, CH4, and N2O) from several perialpine and alpine hydropower reservoirs by diffusion and loss in turbines. Aquatic Sciences, 74, 619-635.
190	Klintsjön/S7, Sweden	Sweden	Lake	GP	2.0374	0.572509	1	57.128	14.7	2.0374		0.1		D			245	245		Bastviken et al., 2004	Johnson et al 2022	Bastviken, D., Cole, J., Pace, M. & Tranvik, L. Methane emissions from lakes: Dependence of lake characteristics, two regional assessments, and a global estimate. Global Biogeochemical Cycles 18, (2004).
37	Angrenjin Co Lake, Tibetan Plateau, China	China	Lake	GP	1.6	0.584	1	29.2	87.3667					D			NA	365		Yan et al. 2018	Zheng et al., 2022	Yan F, Sillanpää M, Kang S et al. (2018) Lakes on the Tibetan Plateau as conduits of greenhouse gases to the atmosphere. Journal of Geophysical Research: Biogeosciences, 123, 2091-2103.
179	RB, Canada	Canada	Lake	B	2.6	0.625404	1	53.52	-77.39	2.6				D			NA	187.2		Tremblay et al., 2005	Johnson et al 2022	Tremblay, A., Therrien, J., Hamlin, B., Wichmann, E., & LeDrew, L. J. (2005). Greenhouse gas emissions—Fluxes and processes hydroelectric reservoirs and natural environments. In A. Tremblay, L. Varfalvy, C. Roehm, & M. Garneau (Eds.), (pp. 209–232). Springer.
155	Chibougamau lakes, Canada	Canada	Lake	GP	2.6733	0.641913	1	49.6	-74	2.6733		171	12	D			NA	186.6		Rasilo et al. 2014	Johnson et al 2022	Rasilo, T., Prairie, Y. T., & del Giorgio, P. A. (2015). Largescale patterns in summer diffusive CH4 fluxes across Boreal lakes, and contributions to diffusive C emissions. Global Change Biology, 21, 1124–1139. https://doi.org/10.1111/gcb.1274
90	Crampton, United States of America	United States of America	Lake	T	2.3264	0.641993	3	44.848	-89.4207	1.68677	0.95945	0.2585	18.5	D			NA	237.8		West et al., 2016; Bastviken et al., 2004	Johnson et al 2022	West, W. E., Creamer, K. P., & Jones, S. E. (2016). Productivity and depth regulate lake contributions to atmospheric methane: Lake productivity fuels methane emissions. Limnology & Oceanography, 61, 1–11. ; Bastviken, D., Cole, J., Pace, M. & Tranvik, L. Methane emissions from lakes: Dependence of lake characteristics, two regional assessments, and a global estimate. Global Biogeochemical Cycles…
220	Ormajärvi, Finland	Finland	Lake	T	2.45217	0.642026	3	61.1	24.967	2.45217		6.53	30	D			NA	217.6		Linnaluoma 2012; Ojala et al., 2011	Johnson et al 2022	Linnaluoma, J. (2012). Factors controlling carbon gas fluxes in Boreal lakes. Academic dissertation in environmental Ecology, Department of Environment Science, Aquatic Science (pp. 1–73). University of Helsinki.; Ojala, A., Bellido, J. L., Tulonen, T., Kankaala, P., & Huotari, J. (2011). Carbon gas fluxes from a brown-water and a clear-water lake in the boreal zone during a summer with extreme r…
269	6, Sweden	Sweden	Lake	GP	2.9521	0.647277	1	68	18	2.9521		4.05e-05	0.79	D			NA	156.8		Karlsson et al. 2013	Johnson et al 2022	Karlsson, J., Gielser R., Persson, J., Lundin E. (2013). High emission of carbon dioxide and methane during ice thaw in high latitude lakes. GRL. 40 (6), 1123-1127
298	ATQ-200, United States of America	United States of America	Lake	T	3.76	0.6486	1	70.46	-156.948	3.76		2.713	1.1	D			90	90		Townsend-Small et al. 2017	Kuhn et al., 2021	Townsend-Small, A., Åkerström, F., Arp, C. D. & Hinkel, K. M. Spatial and Temporal Variation in Methane Concentrations, Fluxes, and Sources in Lakes in Arctic Alaska: Methane in Arctic Alaskan lakes. Journal of Geophysical Research: Biogeosciences 122, 2966–2981 (2017).
105	Roach, United States of America	United States of America	Lake	T	2.38055	0.652271	2	45.96	-89.62	1.9434	0.43715	0.45	10	DE			NA	235		Bastviken et al., 2004	Johnson et al 2022	Bastviken, D., Cole, J., Pace, M. & Tranvik, L. Methane emissions from lakes: Dependence of lake characteristics, two regional assessments, and a global estimate. Global Biogeochemical Cycles 18, (2004).
254	LKh7, Russia	Russia	Lake	T	3.189	0.655021	1	63.9303	75.6911	3.189		0.001382	0.375	D			137	137		Serikova et al. 2019	Kuhn et al., 2021	Serikova, S., Pokrovsky, O.S., Laudon, H. (2019). High carbon emissions from thermokarst lakes of Western Siberia. Nat Commun 10, 1552
189	Gyslättasjön/S7, Sweden	Sweden	Lake	GP	2.5066	0.704355	1	57.11	14.479	2.5066		0.263		D			245	245		Bastviken et al., 2004	Johnson et al 2022	Bastviken, D., Cole, J., Pace, M. & Tranvik, L. Methane emissions from lakes: Dependence of lake characteristics, two regional assessments, and a global estimate. Global Biogeochemical Cycles 18, (2004).
109	Sparkling, United States of America	United States of America	Lake	T	2.88	0.747994	1	46.008	-89.7	2.88				D			NA	214.6		Riera et al., 1999	Johnson et al 2022	Riera, J. L., Schindler, J. E., & Kratz, T. K. (1999). Seasonal dynamics of carbon dioxide and methane in two clear-water lakes and two bog lakes in Northern Wisconsin, U.S.A. Canadian Journal of Fisheries and Aquatic Sciences, 56(2), 265–274. https://doi.org/10.1139/f98-182
250	LKh5,Russia	Russia	Lake	T	3.688	0.757515	1	63.8128	75.7011	3.688		0.008248	0.875	D			137	137		Serikova et al. 2019	Kuhn et al., 2021	Serikova, S., Pokrovsky, O.S., Laudon, H. (2019). High carbon emissions from thermokarst lakes of Western Siberia. Nat Commun 10, 1552
249	LKh20,Russia	Russia	Lake	T	3.752	0.770661	1	63.8072	75.5836	3.752		0.005016	0.175	D			137	137		Serikova et al. 2019	Kuhn et al., 2021	Serikova, S., Pokrovsky, O.S., Laudon, H. (2019). High carbon emissions from thermokarst lakes of Western Siberia. Nat Commun 10, 1552
1	Daming, Antarctica	Antarctica	Lake	T	3.336	0.782359	1	-69.157	76.561	3.336				D			NA	178.6		Ding et al., 2013	Johnson et al 2022	Ding, W., Zhu, R., Dawei, M. A., & Xu, H. (2013). Summertime fluxes of N2O, CH4 and CO2 from the littoral zone of Lake Daming, East Antarctica: Effects of environmental conditions. Antarctic Science, 25, 752–762. https://doi.org/10.1017/S0954102013000242
159	Québec, Canada	Canada	Lake	GP	3.4	0.8126	2	51.5	-74					D			NA	185	Mesotrophic	Teodoru et al. 2012	Zheng et al., 2022	Teodoru CR, Bastien J, Bonneville MC et al. (2012) The net carbon footprint of a newly created boreal hydroelectric reservoir. Global Biogeochemical Cycles, 26, GB2016.
191	Grunnen/S7, Sweden	Sweden	Lake	GP	2.9655	0.833306	1	57.156	14.416	2.9655		0.48		D			245	245		Bastviken et al., 2004	Johnson et al 2022	Bastviken, D., Cole, J., Pace, M. & Tranvik, L. Methane emissions from lakes: Dependence of lake characteristics, two regional assessments, and a global estimate. Global Biogeochemical Cycles 18, (2004).
34	Lake Maggiore, United States of America	United States of America	Lake	T	2.3014	0.840011	1	27.607	-82.664	2.3014				D			NA	365		Barber et al., 1988	Johnson et al 2022	Barber, T. R., Burke, R. A., & Sackett, W. M. (1988). Diffusive flux of methane from warm wetlands. Global Biogeochemical Cycles, 2, 411–425. https://doi.org/10.1029/GB002i004p00411
317	BRW-107, United States of America	United States of America	Lake	T	4.91	0.846975	1	71.27	-156.497	4.91	0	1.25	1.6	DE			90	90		Townsend-Small et al. 2017	Kuhn et al., 2021	Townsend-Small, A., Åkerström, F., Arp, C. D. & Hinkel, K. M. Spatial and Temporal Variation in Methane Concentrations, Fluxes, and Sources in Lakes in Arctic Alaska: Methane in Arctic Alaskan lakes. Journal of Geophysical Research: Biogeosciences 122, 2966–2981 (2017).
193	Glimmingen, Sweden	Sweden	Lake	T	2.406	0.848548	1	57.93	15.57	2.406	0	1.67	32	DE			NA	347.4	Oligotrophic	Rinta et al., 2016	Johnson et al 2022	Rinta, P., Bastviken, D., Schilder, J., Van Hardenbroek, M., Stötter, T., & Heiri, O. (2017). Higher late summer methane emission from central than northern European lakes. Journal of Limnology, 76, 52–67.
115	Tube, Canada	Canada	Lake	T	3.312	0.858802	1	46.226	-80.296	3.312				D			NA	214		Walter et al., 2006	Johnson et al 2022	Walter, K. M., Zimov, S., Chanton, J. P., Verbyla, D., & Chapin, F. S. (2006). Methane bubbling from Siberian thaw lakes as a positive feedback to climate warming. Nature, 443(7107), 71. https://doi.org/10.1038/nature05040
147	Glacier Pond, United States of America	United States of America	Lake	T	3.3067	0.860205	1	47.95	-91.567	3.3067				D			NA	215.2		Michmerhuizen et al., 1996	Johnson et al 2022	Michmerhuizen, C. M., Striegl, R. G., & McDonald, M. E. (1996). Potential methane emission from north-temperate lakes following ice melt. Limnology & Oceanography, 41(5), 985–991
206	Ljustjärn/S7, Sweden	Sweden	Lake	GP	3.0919	0.868824	1	59.924	15.453	3.0919		0.13		D			245	245		Bastviken et al., 2004	Johnson et al 2022	Bastviken, D., Cole, J., Pace, M. & Tranvik, L. Methane emissions from lakes: Dependence of lake characteristics, two regional assessments, and a global estimate. Global Biogeochemical Cycles 18, (2004).
199	Stora Vänstern, Sweden	Sweden	Lake	T	2.5664	0.908352	1	58.62	15.15	2.5664	0	1.13	21	DE			NA	349.2	Oligotrophic	Rinta et al., 2016	Johnson et al 2022	Rinta, P., Bastviken, D., Schilder, J., Van Hardenbroek, M., Stötter, T., & Heiri, O. (2017). Higher late summer methane emission from central than northern European lakes. Journal of Limnology, 76, 52–67.
118	Lake Jean, Québec, Canada	Canada	Lake	GP	3.424	0.941532	1	46.35	-76.3333					D			NA	236.4		Ouellet et al. 2012	Zheng et al., 2022	Ouellet A, Lalonde K, Plouhinec JB et al. (2012) Assessing carbon dynamics in natural and perturbed boreal aquatic systems. Journal of Geophysical Research: Biogeosciences, 117, G03024
200	Skärgölen, Sweden	Sweden	Lake	T	3.6892	0.943697	1	58.76	16.23	2.8872	0.802	0.16	13	DE			NA	209	Mesotrophic	Rinta et al., 2016	Johnson et al 2022	Rinta, P., Bastviken, D., Schilder, J., Van Hardenbroek, M., Stötter, T., & Heiri, O. (2017). Higher late summer methane emission from central than northern European lakes. Journal of Limnology, 76, 52–67.
282	Coleen, United States of America	United States of America	Lake	TH	5	0.95	1	70.13	-149.28	5				D			115	115		Kling et al. 1992	Johnson et al 2022	Kling, G. W., Kipphut, G. W., & Miller, M. C. (1992). The flux of CO2 and CH4 from lakes and rivers in Arctic Alaska. Hydrobiologia, 240, 23–36. https://doi.org/10.1007/BF00013449
219	Enonselkä, Finland	Finland	Lake	T	3.84	0.97367	1	61.083	25.583	3.84				D			NA	205.8		Bellido et al., 2011	Johnson et al 2022	Bellido, J. L., Peltomaa, E., & Ojala, A. (2011). An urban boreal lake basin as a source of CO2 and CH4. Environmental pollution, 159, 1649–1659. https://doi.org/10.1016/j.envpol.2011.02.042
316	BRW-100a, United States of America	United States of America	Lake	T	5.67	0.978075	1	71.24	-156.774	5.67	0	1.838	1.8	DE			90	90		Townsend-Small et al. 2017	Kuhn et al., 2021	Townsend-Small, A., Åkerström, F., Arp, C. D. & Hinkel, K. M. Spatial and Temporal Variation in Methane Concentrations, Fluxes, and Sources in Lakes in Arctic Alaska: Methane in Arctic Alaskan lakes. Journal of Geophysical Research: Biogeosciences 122, 2966–2981 (2017).
96	Roşu, Romania	Romania	Lake	T	4.224	0.999483	1	45.053	29.53	4.224				D			NA	181.6		Pavel et al., 2008	Johnson et al 2022	Pavel, A. P. (2008) Simple Model for Monitoring Balkhash Lake Water Levels and Ili River Discharges: Application of Remote Sensing. Lake Reserv. Res. Manag., 13 (1), 77– 81
88	North Gate, United States of America	United States of America	Lake	T	3.3679	1.0652	2	44.175	-89.425	1.94815	2.8395	0.3125	8	DE			NA	295.4		Bastviken et al., 2004; West et al., 2016	Johnson et al 2022	Bastviken, D., Cole, J., Pace, M. & Tranvik, L. Methane emissions from lakes: Dependence of lake characteristics, two regional assessments, and a global estimate. Global Biogeochemical Cycles 18, (2004).; West, W. E., Creamer, K. P., & Jones, S. E. (2016). Productivity and depth regulate lake contributions to atmospheric methane: Lake productivity fuels methane emissions. Limnology & Oceanography…
283	Tundra Region, United States of America	United States of America	Lake	GP	5.625	1.08844	1	70.2062	-148.444	5.625		0.442077		D			120	120		Sasaki et al. 2016	Kuhn et al., 2021	Sasaki, M., Kim, Y.W., Uchida, M., Utsumi, M (2016). Polar Science, 10 (3), 303-311
150	Tofte, United States of America	United States of America	Lake	T	4.2844	1.11454	1	47.967	-91.583	4.2844				D			NA	215.2		Michmerhuizen et al., 1996	Johnson et al 2022	Michmerhuizen, C. M., Striegl, R. G., & McDonald, M. E. (1996). Potential methane emission from north-temperate lakes following ice melt. Limnology & Oceanography, 41(5), 985–991
229	Jyväsjärvi, Finland	Finland	Lake	T	4.812	1.15344	1	62.24	25.77	2.8872	1.9248	3.03	25	DE			NA	186	Mesotrophic	Rinta et al., 2016	Johnson et al 2022	Rinta, P., Bastviken, D., Schilder, J., Van Hardenbroek, M., Stötter, T., & Heiri, O. (2017). Higher late summer methane emission from central than northern European lakes. Journal of Limnology, 76, 52–67.
306	Lake N2, Russia	Russia	Lake	B	5.92	1.19359	1	70.83	147.428	5.92				D			NA	131.6		van Hardenbroek et al., 2013	Johnson et al 2022	van Hardenbroek, M., Lotter, A. F., Bastviken, D., Duc, N. T., & Heiri, O. (2012). Relationship between δ13C of chironomid remains and methane flux in Swedish lakes. Freshwater Biology, 57, 166–177. https://doi.org/10.1111/j.1365-2427.2011.02710.x
281	Aeolian Silt, United States of America	United States of America	Lake	T	6.25	1.20938	1	70.02	-156.7	6.25		0.808771	2.28167	D			120	120		Elder et al. 2018	Kuhn et al., 2021	Elder, C.D., Xu, X., Walker, J. (2018) Greenhouse gas emissions from diverse Arctic Alaskan lakes are dominated by young carbon. Nature Clim Change 8, 166–171
310	Pipeline, United States of America	United States of America	Lake	GP	7.18	1.25061	1	71.174	-156.789		7.18	0.7099	1.5	E		Yes	-	92.4		Engram et al. 2020	Kuhn et al., 2021	Engram, M., Walter Anthony, K.M., Sachs, T. (2020) Author Correction: Remote sensing northern lake methane ebullition. Nat. Clim. Chang. 10, 876
309	Coastal Plain, United States of America	United States of America	Lake	T	6.58	1.27323	1	71.12	-156.32	6.58		2.78887	1.34	D			120	120		Elder et al. 2018	Kuhn et al., 2021	Elder, C.D., Xu, X., Walker, J. (2018) Greenhouse gas emissions from diverse Arctic Alaskan lakes are dominated by young carbon. Nature Clim Change 8, 166–171
222	Alinen Mustajärvi, Finland	Finland	Lake	T	4.87933	1.28502	3	61.2	25.1	4.87933				D			NA	219.8		Nykänen et al.,2014	Johnson et al 2022	Nykänen, H., Peura, S., Kankaala, P., & Jones, R. (2014). Recycling and fluxes of carbon gases in a stratified boreal lake following experimental carbon addition. Biogeosciences Discussions, 11, 16447–16495.
143	Nussbaumersee middle, Switzerland	Switzerland	Lake	T	194.726	1.28801	1	47.62	8.82	3.5288	191.197	0.25	8	DE	Yes		NA	365	Mesotrophic	Rinta et al., 2016	Johnson et al 2022	Rinta, P., Bastviken, D., Schilder, J., Van Hardenbroek, M., Stötter, T., & Heiri, O. (2017). Higher late summer methane emission from central than northern European lakes. Journal of Limnology, 76, 52–67.
287	ATQ-207, United States of America	United States of America	Lake	T	7.7	1.32825	1	70.33	-156.592	7.7	0	3.536	0.8	DE			90	90		Townsend-Small et al. 2017	Kuhn et al., 2021	Townsend-Small, A., Åkerström, F., Arp, C. D. & Hinkel, K. M. Spatial and Temporal Variation in Methane Concentrations, Fluxes, and Sources in Lakes in Arctic Alaska: Methane in Arctic Alaskan lakes. Journal of Geophysical Research: Biogeosciences 122, 2966–2981 (2017).
177	121 headwater lakes, Ireland	Ireland	Lake	T	5.76	1.3468	1	53.4	-8.23333					D			NA	177.6		Whitfield et al. 2011	Zheng et al., 2022	Whitfield CJ, Aherne J, Baulch HM (2011) Controls on greenhouse gas concentrations in polymictic headwater lakes in Ireland. Science of the Total Environment, 410-411, 217-225
186	Schefferville lakes, Canada	Canada	Lake	GP	6.6833	1.35404	1	55	-67	6.6833		242	8	D			NA	133		Rasilo et al. 2014	Johnson et al 2022	Rasilo, T., Prairie, Y. T., & del Giorgio, P. A. (2015). Largescale patterns in summer diffusive CH4 fluxes across Boreal lakes, and contributions to diffusive C emissions. Global Change Biology, 21, 1124–1139. https://doi.org/10.1111/gcb.1274
97	Puiu, Romania	Romania	Lake	T	5.76	1.36293	1	45.061	29.47	5.76				D			NA	181.6		Pavel et al., 2008	Johnson et al 2022	Pavel, A. P. (2008) Simple Model for Monitoring Balkhash Lake Water Levels and Ili River Discharges: Application of Remote Sensing. Lake Reserv. Res. Manag., 13 (1), 77– 81
11	Tereza, Brazil	Brazil	Lake	TR	3.8992	1.42321	1	-18.961	-57.441	2.8878	1.0114			DE			NA	365		Bastviken et al., 2010	Johnson et al 2022	Bastviken, D. et al. Methane emissions from Pantanal, South America, during the low water season: toward more comprehensive sampling. Environmental Science & Technology 44, 5450–5455 (2010).
32	Dianchi Lake, China	China	Lake	T	3.912	1.42788	1	24.948	102.667	3.912				D			NA	365		Chen et al., 2006	Johnson et al 2022	Chen, Y., Li, X., Hu, Z., Liu, W., & Hu, W. (2006). Carbon dioxide flux on the water-air interface of the eight Lakes in China in winter (in Chinese). Ecology and Environment, 15, 665–669.
244	LKh21,Russia	Russia	Lake	T	6.973	1.43225	1	63.7853	75.7583	6.973		0.002576	0.675	D			137	137		Serikova et al. 2019	Kuhn et al., 2021	Serikova, S., Pokrovsky, O.S., Laudon, H. (2019). High carbon emissions from thermokarst lakes of Western Siberia. Nat Commun 10, 1552
274	Toolik lake, United States of America	United States of America	Lake	B	8.60225	1.4586	4	68.6264	-149.603	12.487	3.7095	1.449	24.05	DE			-	85.8		Eugster et al. 2020; Engram et al. 2020; Kling et al., 1992; Sepulveda-Jauregui et al. 2015	Zheng et al., 2022; Kuhn et al., 2021; Johnson et al 2022	Eguster, W., DelSontro, T., Shaver., G.R., Kling, G., (2020). Interannual, summer, and diel variability of CH4 and CO2 effluxes from Toolik Lake, Alaska, during the ice-free periods 2010–2015. Environmental Science : Process and Impacts, 11, Engram, M., Walter Anthony, K.M., Sachs, T. (2020) Author Correction: Remote sensing northern lake methane ebullition. Nat. Clim. Chang. 10, 876 ; Kling, G.W…
204	Langsjon, Sweden	Sweden	Lake	T	5.76	1.47341	1	59.887	15.954	5.76				D			NA	209		Van Hardenbroek et al., 2012	Johnson et al 2022	van Hardenbroek, M., Lotter, A. F., Bastviken, D., Duc, N. T., & Heiri, O. (2012). Relationship between δ13C of chironomid remains and methane flux in Swedish lakes. Freshwater Biology, 57, 166–177. https://doi.org/10.1111/j.1365-2427.2011.02710.x
56	Ngoring Lake, Tibetan Plateau, China	China	Lake	GP	6.4	1.4857	1	34.0667	97.75					D			NA	175.2		Yan et al. 2018	Zheng et al., 2022	Yan F, Sillanpää M, Kang S et al. (2018) Lakes on the Tibetan Plateau as conduits of greenhouse gases to the atmosphere. Journal of Geophysical Research: Biogeosciences, 123, 2091-2103.
58	Kasumigaura, Japan	Japan	Lake	T	4.2418	1.54826	1	36.04	140.399	4.2418				D			NA	365		Utsumi et al., 1998	Johnson et al 2022	Utsumi, M., Nojiri, Y., Nakamura, T., Nozawa, T., Otsuki, A., & Seki, H. (1998). Oxidation of dissolved methane in a eutrophic, shallowlake:Lake Kasumigaura, Japan. Limnology and Oceanography, 43(3), 471–490.
225	Lake Kuivajärvi, Finland	Finland	Lake	T	6.29955	1.57174	6	61.8327	24.2801	1.6546	20.304	0.62	13.2	D			NA	200	Mesotrophic	Erkkilä et al. 2018; Miettinen et al. 2015; Stepanenko et al., 2016	Kuhn et al., 2021; Zheng et al., 2022; Johnson et al 2022	Erkkilä, K.-M., Ojala, A., Bastviken, D., Biermann, T., Heiskanen, J. J., Lindroth, A., et al. (2018). Methane and carbon dioxide fluxes over a lake: Comparison between eddy covariance, floating chambers and boundary layer method. Biogeosciences, 15, 429–445.;
59	Biwa, Japan	Japan	Lake	T	4.32	1.5768	1	36.5	136.5	4.32				D			NA	365		Miyajima et al., 1997	Johnson et al 2022	Miyajima, T., Yamada, Y., Wada, E., Nakajima, T., Koitabashi, T., Hanba, Y. T., & Yoshii, K. (1997). Distribution of greenhouse gases, nitrite, and δ13C of dissolved inorganic carbon in Lake Biwa: Implications for hypolimnetic metabolism. Biogeochemistry, 36, 205–221. https://doi.org/10.1023/a:1005702707183
140	Seealpsee, Switzerland	Switzerland	Lake	T	4.3308	1.58074	1	47.27	9.4	4.3308	0	0.13	15	DE			NA	365	Oligotrophic	Rinta et al., 2016	Johnson et al 2022	Rinta, P., Bastviken, D., Schilder, J., Van Hardenbroek, M., Stötter, T., & Heiri, O. (2017). Higher late summer methane emission from central than northern European lakes. Journal of Limnology, 76, 52–67.
299	ATQ-Ikmakraka, United States of America	United States of America	Lake	T	1832.8	1.59045	1	70.48	-157.459	9.22	1832.8	9.257	3	DE	Yes		90	90		Townsend-Small et al. 2017	Kuhn et al., 2021	Townsend-Small, A., Åkerström, F., Arp, C. D. & Hinkel, K. M. Spatial and Temporal Variation in Methane Concentrations, Fluxes, and Sources in Lakes in Arctic Alaska: Methane in Arctic Alaskan lakes. Journal of Geophysical Research: Biogeosciences 122, 2966–2981 (2017).
268	1, Sweden	Sweden	Lake	GP	7.3804	1.61823	1	68	18	7.3804		2.88e-05	0.21	D			NA	156.8		Karlsson et al. 2013	Johnson et al 2022	Karlsson, J., Gielser R., Persson, J., Lundin E. (2013). High emission of carbon dioxide and methane during ice thaw in high latitude lakes. GRL. 40 (6), 1123-1127
44	Taihu, China	China	Lake	T	4.83	1.64529	1	31.374	120.141	4.83				D			NA	330.2		Xiao et al., 2014	Johnson et al 2022	Xiao S, Liu W, Yang H et al. (2014) Extreme methane bubbling emissions from a subtropical shallow eutrophic pond. Austin Biometrics and Biostatistics, 1, 6.
60	Qinghai Lake-1, Tibetan Plateau, China	China	Lake	GP	7.2	1.67746	1	36.5667	100.533					D			NA	176.4		Yan et al. 2018	Zheng et al., 2022	Yan F, Sillanpää M, Kang S et al. (2018) Lakes on the Tibetan Plateau as conduits of greenhouse gases to the atmosphere. Journal of Geophysical Research: Biogeosciences, 123, 2091-2103.
203	Strandsjon, Sweden	Sweden	Lake	T	6.56	1.67805	1	59.874	17.168	6.56				D			NA	209		Van Hardenbroek et al., 2012	Johnson et al 2022	van Hardenbroek, M., Lotter, A. F., Bastviken, D., Duc, N. T., & Heiri, O. (2012). Relationship between δ13C of chironomid remains and methane flux in Swedish lakes. Freshwater Biology, 57, 166–177. https://doi.org/10.1111/j.1365-2427.2011.02710.x
243	Floatplane, United States of America	United States of America	Lake	GP	8.462	1.69663	1	63.39	-148.67	8.462				D			130	130		Sepulveda-Jauregui et al. 2015	Johnson et al 2022	Sepulveda-Jauregui, A., Walter Anthony, K. M., Martinez-Cruz, K., Greene, S., & Thalasso, F. (2015). Methane and carbon dioxide emissions from 40 lakes along a north-south latitudinal transect in Alaska. Biogeosciences, 12(11), 3197–3223. https://doi.org/10.5194/bg-12-3197-2015
212	MTLake, Russia	Russia	Lake	B	8.1	1.69889	1	60.59	70.1	8.1		0.23		D			NA	143.2	Eutrophic	Repo et al. 2007	Johnson et al 2022	Repo ME, Huttunen JT, Naumov AV et al. (2007) Release of CO2 and CH4 from small wetland lakes in western Siberia. Tellus B: Chemical and Physical Meteorology, 59, 788-796.
38	Dongting Lake, China	China	Lake	T	4.7976	1.75112	1	29.361	113.041	4.7976				D			NA	365		Chen et al., 2006	Johnson et al 2022	Chen, Y., Li, X., Hu, Z., Liu, W., & Hu, W. (2006). Carbon dioxide flux on the water-air interface of the eight Lakes in China in winter (in Chinese). Ecology and Environment, 15, 665–669.
19	Tendo, Ivory Coast	Ivory Coast	Lake	TR	4.816	1.75784	2	5.131	-3.132	4.816				D			NA	365		Koné et al., 2008; Koné et al., 2010	Johnson et al 2022	Koné YJM, Abril G, Delille B et al. (2010) Seasonal variability of methane in the rivers and lagoons of Ivory Coast (West Africa). Biogeochemistry, 100, 21-37.
318	Glaciomarine, United States of America	United States of America	Lake	T	9.17	1.77439	1	71.27	-156.5	9.17		5.4844	1.92	D			120	120		Elder et al. 2018	Kuhn et al., 2021	Elder, C.D., Xu, X., Walker, J. (2018) Greenhouse gas emissions from diverse Arctic Alaskan lakes are dominated by young carbon. Nature Clim Change 8, 166–171
286	ATQ-201, United States of America	United States of America	Lake	T	10.35	1.78537	1	70.33	-156.807	10.35	0	1.455	1.1	DE			90	90		Townsend-Small et al. 2017	Kuhn et al., 2021	Townsend-Small, A., Åkerström, F., Arp, C. D. & Hinkel, K. M. Spatial and Temporal Variation in Methane Concentrations, Fluxes, and Sources in Lakes in Arctic Alaska: Methane in Arctic Alaskan lakes. Journal of Geophysical Research: Biogeosciences 122, 2966–2981 (2017).
27	Lago Zirahuen, Mexico	Mexico	Lake	TR	4.9	1.7885	1	19.436	-101.739	4.9				D			NA	365		Gonzalez-Valencia et al., 2014	Johnson et al 2022	Gonzalez-Valencia R, Sepulveda-Jauregui A, Martinez-Cruz K et al. (2014) Methane emissions from Mexican freshwater bodies: correlations with water pollution. Hydrobiologia, 721, 9-22.
126	11th Crow Wing, United States of America	United States of America	Lake	T	6.8089	1.81607	1	46.8	-94.733	6.8089				D			NA	224.6		Michmerhuizen et al., 1996	Johnson et al 2022	Michmerhuizen, C. M., Striegl, R. G., & McDonald, M. E. (1996). Potential methane emission from north-temperate lakes following ice melt. Limnology & Oceanography, 41(5), 985–991
240	Mekrijärvi, Finland	Finland	Lake	GP	7.1289	1.81758	1	62.45	31	7.1289		8.3	3	D			NA	207.8	Eutrophic	Juutinen et al. 2003	Johnson et al 2022	Juutinen, S. et al. Major implication of the littoral zone for methane release from boreal lakes. Global Biogeochemical Cycles 17, (2003).
116	Lake Bouleau, Québec, Canada	Canada	Lake	GP	6.672	1.83467	1	46.2333	-76.45			0.023		D			NA	236.4		Ouellet et al. 2012	Zheng et al., 2022	Ouellet A, Lalonde K, Plouhinec JB et al. (2012) Assessing carbon dynamics in natural and perturbed boreal aquatic systems. Journal of Geophysical Research: Biogeosciences, 117, G03024
238	LKg6,Russia	Russia	Lake	T	8.824	1.83716	1	62.3419	74.2283	8.824		0.00317	1	D			141	141		Serikova et al. 2019	Kuhn et al., 2021	Serikova, S., Pokrovsky, O.S., Laudon, H. (2019). High carbon emissions from thermokarst lakes of Western Siberia. Nat Commun 10, 1552
202	Lotsjon, Sweden	Sweden	Lake	T	8.16	2.08733	1	59.867	17.948	8.16				D			NA	209		Van Hardenbroek et al., 2012	Johnson et al 2022	van Hardenbroek, M., Lotter, A. F., Bastviken, D., Duc, N. T., & Heiri, O. (2012). Relationship between δ13C of chironomid remains and methane flux in Swedish lakes. Freshwater Biology, 57, 166–177. https://doi.org/10.1111/j.1365-2427.2011.02710.x
233	LKg15,Russia	Russia	Lake	GP	10.127	2.10844	1	62.2653	74.2711	10.127		0.023985	1.375	D			141	141		Serikova et al. 2019	Kuhn et al., 2021	Serikova, S., Pokrovsky, O.S., Laudon, H. (2019). High carbon emissions from thermokarst lakes of Western Siberia. Nat Commun 10, 1552
234	Heposälkä, Finland	Finland	Lake	GP	8.02	2.11776	1	62.3	29.3	8.02		46	35	D			NA	220.8	Eutrophic	Juutinen et al. 2003	Johnson et al 2022	Juutinen, S. et al. Major implication of the littoral zone for methane release from boreal lakes. Global Biogeochemical Cycles 17, (2003).
253	LKh6, Russia	Russia	Lake	T	10.557	2.16841	1	63.9231	75.6825	10.557		0.001829	0.25	D			137	137		Serikova et al. 2019	Kuhn et al., 2021	Serikova, S., Pokrovsky, O.S., Laudon, H. (2019). High carbon emissions from thermokarst lakes of Western Siberia. Nat Commun 10, 1552
160	Eastmain lakes, Canada	Canada	Lake	GP	9.3567	2.23232	1	52	-75	9.3567		2	8	D			NA	184.4		Rasilo et al. 2014	Johnson et al 2022	Rasilo, T., Prairie, Y. T., & del Giorgio, P. A. (2015). Largescale patterns in summer diffusive CH4 fluxes across Boreal lakes, and contributions to diffusive C emissions. Global Change Biology, 21, 1124–1139. https://doi.org/10.1111/gcb.1274
187	Loch of Clunie, United Kingdom	United Kingdom	Lake	T	6.7164	2.27095	1	56.581	-3.439	6.7164				D			NA	326.6		Harley et al., 2013	Johnson et al 2022	Harley, J. F. (2013). From Source to Sea: Spatial and temporal fluxes of the greenhouse gases N2O, CO2 and CH4 in the river tay catchment. Ph.D. thesis. Retrieved from https://era.ed.ac.uk/handle/1842/7527
83	Mendota, United States of America	United States of America	Lake	T	7.968	2.28028	1	43.107	-89.425	7.968				D			NA	252.4		Fallon et al., 1980	Johnson et al 2022	Fallon, R. D., Harrits, S., Hanson, R. S., & Brock, T. D. (1980). The role of methane in internal carbon cycling in Lake Mendota during summer stratification. Limnology and Oceanography, 25, 357–360. https://doi.org/10.4319/lo.1980.25.2.0357
98	Roşuleţ, Romania	Romania	Lake	T	9.984	2.36241	1	45.079	29.634	9.984				D			NA	181.6		Pavel et al., 2008	Johnson et al 2022	Pavel, A. P. (2008) Simple Model for Monitoring Balkhash Lake Water Levels and Ili River Discharges: Application of Remote Sensing. Lake Reserv. Res. Manag., 13 (1), 77– 81
208	Tämnaren, Sweden	Sweden	Lake	T	9.61667	2.45994	3	60.163	17.337	9.61667		38	2	D			NA	209		Podgrajsek et al 2014	this study	Podgrajsek E, Sahlée E, Bastviken D et al. (2013) Comparison of floating chamber and eddy covariance measurements of lake greenhouse gas fluxes. Biogeosciences Discussions, 10, 18309-18335.
277	19 lakes, Russia	Russia	Lake	TH	12.46	2.48427	1	69	154	5.4	7.06			T			NA	128.4		Zimov et al. 1997	Johnson et al 2022	Zimov, S. A., Voropaev, Y. V., Semiletov, I. P., Davidov, S. P., Prosiannikov, S. F., Chapin, M. C., et al. (1997). North Siberian lakes: A methane source fueled by Pleistocene carbon. Science, 277(5327), 800–802. https://doi.org/10.1126/science.277.5327.800
148	Ojibway, United States of America	United States of America	Lake	T	9.7244	2.52971	1	47.95	-91.55	9.7244				D			NA	215.2		Michmerhuizen et al., 1996	Johnson et al 2022	Michmerhuizen, C. M., Striegl, R. G., & McDonald, M. E. (1996). Potential methane emission from north-temperate lakes following ice melt. Limnology & Oceanography, 41(5), 985–991
2	Lynch, Chile	Chile	Lake	B	8.136	2.52997	1	-53.176	-71.007	8.136				D			NA	287.8		Gerardo-Nieto et al., 2017	Johnson et al 2022	Gerardo-Nieto, O., Astorga-España, M. S., Mansilla, A., & Thalasso, F. (2017). Initial report on methane and carbon dioxide emission dynamics from sub-Antarctic freshwater ecosystems: A seasonal study of a lake and a reservoir. Science of the Total Environment, 593–594, 144–154. https://doi.org/10.1016/j.scitotenv.2017.02.144
194	Kisasjön north, Sweden	Sweden	Lake	T	7.8596	2.77192	1	58.01	15.65	7.3784	0.4812	0.96	9	DE			NA	347.4	Mesotrophic	Rinta et al., 2016	Johnson et al 2022	Rinta, P., Bastviken, D., Schilder, J., Van Hardenbroek, M., Stötter, T., & Heiri, O. (2017). Higher late summer methane emission from central than northern European lakes. Journal of Limnology, 76, 52–67.
87	Brown, United States of America	United States of America	Lake	T	8.8031	2.78424	2	44.174	-89.397	3.6023	10.4016	0.3125	4.9	D			NA	295.4		West et al., 2016; Bastviken et al., 2004	Johnson et al 2022	West, W. E., Creamer, K. P., & Jones, S. E. (2016). Productivity and depth regulate lake contributions to atmospheric methane: Lake productivity fuels methane emissions. Limnology & Oceanography, 61, 1–11. ; Bastviken, D., Cole, J., Pace, M. & Tranvik, L. Methane emissions from lakes: Dependence of lake characteristics, two regional assessments, and a global estimate. Global Biogeochemical Cycles…
10	N6b, Brazil	Brazil	Lake	TR	7.6625	2.79681	1	-18.967	-56.633	7.6625	175.598	0.12		D			NA	365		Bastviken et al., 2010	Johnson et al 2022	Bastviken, D. et al. Methane emissions from Pantanal, South America, during the low water season: toward more comprehensive sampling. Environmental Science & Technology 44, 5450–5455 (2010).
216	Big Merganser, United States of America	United States of America	Lake	GP	12.042	2.8224	1	60.73	-150.64	9.424	2.618	0.21	24.2	DE			-	178.4		Sepulveda-Jauregui et al. 2015	Johnson et al 2022	Sepulveda-Jauregui, A., Walter Anthony, K. M., Martinez-Cruz, K., Greene, S., & Thalasso, F. (2015). Methane and carbon dioxide emissions from 40 lakes along a north-south latitudinal transect in Alaska. Biogeosciences, 12(11), 3197–3223. https://doi.org/10.5194/bg-12-3197-2015
84	Long Lake, Dakota, USA	United States of America	Lake	T	11.3609	2.9443	2	43.4028	-102.863	0	0	0.16	7.5	DE			NA	213.8		Smith and Lewis 1992; Tangen et al. 2016	Rosentreter et al., 2021; Zheng et al., 2022	Smith, L. K., & Lewis, W. M. (1992). Seasonality of methane emissions from five lakes and associated wetlands of the Colorado Rockies. Global Biogeochemical Cycles, 6, 323–338.;Tan, Z., Zhuang, Q., Henze, D. K., Frankenberg, C., Dlugokencky, E., Sweeney, C., et al. (2016). Inverse modeling of pan-Arctic methane emissions at high spatial resolution: What can we learn from assimilating satellite re…
271	Subarctic Meltponds,Canada	Canada	Lake	T	13.33	2.9526	1	68.32	-133.43	13.33	0	1e-05	0.6	DE			160	160		Martin et al. 2017	Kuhn et al., 2021	Martin, A.F., Lantz, T.C., Humphreys, E.R., (2017). Ice wedge degradation and CO2 and CH4 emissions in the Tuktoyaktuk Coastlands, Northwest Territories. Arctic Science., 4 (1)
81	Upper Mystic , United States of America	United States of America	Lake	T	10.392	3.18349	1	42.432	-71.148		10.392			E		Yes	NA	281.2		Rõõm et al., 2014	Johnson et al 2022	Rõõm, E. I., Nõges, P., Feldmann, T., Tuvikene, L., Kisand, A., Teearu, H., & Nõges, T.(2014). Years are not brothers: Two-year comparison of greenhouse gas fluxes in large shallow Lake Võrtsjärv, Estonia. Journal of Hydrology, 519, 1594–1606. https://doi.org/10.1016/j.jhydrol.2014.09.011
245	LKh22,Russia	Russia	Lake	T	15.527	3.18925	1	63.7867	75.7558	15.527		0.001643	0.2	D			137	137		Serikova et al. 2019	Kuhn et al., 2021	Serikova, S., Pokrovsky, O.S., Laudon, H. (2019). High carbon emissions from thermokarst lakes of Western Siberia. Nat Commun 10, 1552
270	Villasjön, Sweden	Sweden	Lake	B	14.8324	3.25216	6	68.2677	19.0373	9.682	25.1333	0.17	1.3	D			NA	156.8		Lundin et al., 2013; Jansen et al. 2020; Jammet et al., 2015; Jammet et al., 2017; Jansen et al. 2019; Wik et al. 2013	Johnson et al 2022; Kuhn et al., 2021	Lundin, E. J., Giesler, R., Persson, A., Thompson, M. S., & Karlsson, J. (2013). Integrating carbon emissions from lakes and streams in a subarctic catchment. Journal of Geophysical Research: Biogeosciences, 118, 1200–1207 ; Jansen, J., Thornton, B. F., Jammet, M. M., Wik, M., Cortes, A., Friborg, T., et al. (2019). Climate-sensitive controls on large spring emissions of CH4 and CO2 from Northern…
64	Mono Lake, California, United States of America	United States of America	Lake	T	11.4765	3.30202	2	38.017	-119.009	11.4765				D			NA	254.6		Miller and Oremland. 1988; Oremland et al., 1987	Johnson et al 2022	Miller, L. G., & Oremland, R. S. (1988). Methane efflux from the pelagic regions of four lakes. Global Biogeochemical Cycles, 2, 269–277. ; Oremland, R. S., Miller, L. G., & Whiticar, M. J. (1987). Sources and flux of natural gases from Mono Lake, California. Geochimica et Cosmochimica Acta, 51(11), 2915–2929
36	Poyang Lake, China	China	Lake	T	9.10107	3.32189	4	29.1825	116.088	9.10107		2500		D			NA	365	Mesotrophic	Chen et al., 2006; Lin et al., 2012; Liu et al., 2017; Liu et al., 2013	Johnson et al 2022	Chen, Y., Li, X., Hu, Z., Liu, W., & Hu, W. (2006). Carbon dioxide flux on the water-air interface of the eight Lakes in China in winter (in Chinese). Ecology and Environment, 15, 665–669.;Lin, M., Xu, M., Geng, Y., Liu, L., & Zhang, X. (2012). Spatial heterogeneity and controlling factors of autumn CH4 flux at water-air interface in Poyang Lake of Jiangxi Province, China. Chinese Journal of Ecol…
305	Lake N1, Russia	Russia	Lake	B	16.64	3.35496	1	70.825	147.454	16.64				D			NA	131.6		van Hardenbroek et al., 2013	Johnson et al 2022	van Hardenbroek, M., Lotter, A. F., Bastviken, D., Duc, N. T., & Heiri, O. (2012). Relationship between δ13C of chironomid remains and methane flux in Swedish lakes. Freshwater Biology, 57, 166–177. https://doi.org/10.1111/j.1365-2427.2011.02710.x
246	LKh4,Russia	Russia	Lake	T	16.703	3.4308	1	63.8042	75.7556	16.703		0.000806	0.25	D			137	137		Serikova et al. 2019	Kuhn et al., 2021	Serikova, S., Pokrovsky, O.S., Laudon, H. (2019). High carbon emissions from thermokarst lakes of Western Siberia. Nat Commun 10, 1552
14	Koombooloomba, Australia	Australia	Lake	TR	9.4209	3.43863	1	-17.833	145.604	9.4209				D			NA	365		Bastien et al., 2013	Johnson et al 2022	Bastien, J., & Demarty, M. (2013). Spatio-temporal variation of gross CO2 and CH4diffusive emissions from Australian reservoirs and natural aquatic ecosystems, and estimation of net reservoir emissions. Lakes and Reservoirs: Research and Management, 18, 115–127. https://doi.org/10.1111/lre.12028
279	Big Sky, United States of America	United States of America	Lake	TH	21.154	3.58687	1	69.58	-148.64	19.231	1.923	0.349	2.2	DE			-	85.8		Sepulveda-Jauregui et al. 2015	Johnson et al 2022	Sepulveda-Jauregui, A., Walter Anthony, K. M., Martinez-Cruz, K., Greene, S., & Thalasso, F. (2015). Methane and carbon dioxide emissions from 40 lakes along a north-south latitudinal transect in Alaska. Biogeosciences, 12(11), 3197–3223. https://doi.org/10.5194/bg-12-3197-2015
99	Uzlina, Romania	Romania	Lake	T	15.36	3.63448	1	45.088	29.248	15.36				D			NA	181.6		Pavel et al., 2008	Johnson et al 2022	Pavel, A. P. (2008) Simple Model for Monitoring Balkhash Lake Water Levels and Ili River Discharges: Application of Remote Sensing. Lake Reserv. Res. Manag., 13 (1), 77– 81
9	N7a, Brazil	Brazil	Lake	TR	10.5216	3.84038	1	-18.974	-56.646	10.5216	12.1787	0.1		D			NA	365		Bastviken et al., 2010	Johnson et al 2022	Bastviken, D. et al. Methane emissions from Pantanal, South America, during the low water season: toward more comprehensive sampling. Environmental Science & Technology 44, 5450–5455 (2010).
139	Inkwilersee, Switzerland	Switzerland	Lake	T	254.876	3.86404	1	47.2	7.66	10.5864	244.289	0.1	5	D	Yes		NA	365	Eutrophic	Rinta et al., 2016	Johnson et al 2022	Rinta, P., Bastviken, D., Schilder, J., Van Hardenbroek, M., Stötter, T., & Heiri, O. (2017). Higher late summer methane emission from central than northern European lakes. Journal of Limnology, 76, 52–67.
239	LKg3,Russia	Russia	Lake	T	18.679	3.88897	1	62.3439	74.2781	18.679		0.001075	0.85	D			141	141		Serikova et al. 2019	Kuhn et al., 2021	Serikova, S., Pokrovsky, O.S., Laudon, H. (2019). High carbon emissions from thermokarst lakes of Western Siberia. Nat Commun 10, 1552
52	Cangmu Co Lake, Tibetan Plateau, China	China	Lake	GP	22.24	3.94849	1	32.4333	83.1833					D			NA	97.2		Yan et al. 2018	Zheng et al., 2022	Yan F, Sillanpää M, Kang S et al. (2018) Lakes on the Tibetan Plateau as conduits of greenhouse gases to the atmosphere. Journal of Geophysical Research: Biogeosciences, 123, 2091-2103.
104	East Long, United States of America	United States of America	Lake	T	14.8741	3.96306	2	45.83	-88.678	5.93755	8.93655	0.023		DE			NA	224.2		Bastviken et al., 2004	Johnson et al 2022	Bastviken, D., Cole, J., Pace, M. & Tranvik, L. Methane emissions from lakes: Dependence of lake characteristics, two regional assessments, and a global estimate. Global Biogeochemical Cycles 18, (2004).
227	LC, Russia	Russia	Lake	TH	21.4	3.9941	1	62	129.44	21.4				D			NA	110.2		Nakayama et al. 1994	Johnson et al 2022	Nakayama, T., Nojiri, Y., & Zeng, Y. (1994). Measurement of methane flux from alasses around Yakutsk, Eastern Siberia in 1993, In G. Inoue (Ed.). Proceedings of the second symposium on the joint siberian permafrost studies between Japan and Russia in 1993, (pp. 40–44). National Institute for Environmental Studies, .
8	N8a, Brazil	Brazil	Lake	TR	10.9759	4.0062	1	-18.983	-56.66	10.9759	71.7375	0.16		D			NA	365		Bastviken et al., 2010	Johnson et al 2022	Bastviken, D. et al. Methane emissions from Pantanal, South America, during the low water season: toward more comprehensive sampling. Environmental Science & Technology 44, 5450–5455 (2010).
124	Schwarzsee, Switzerland	Switzerland	Lake	T	11.228	4.09822	1	46.67	7.28	11.228	0	0.45	9	DE			NA	365	Mesotrophic	Rinta et al., 2016	Johnson et al 2022	Rinta, P., Bastviken, D., Schilder, J., Van Hardenbroek, M., Stötter, T., & Heiri, O. (2017). Higher late summer methane emission from central than northern European lakes. Journal of Limnology, 76, 52–67.
266	Sila Lake, Krasnoyarsk Kray, Russia	Russia	Lake	TH	20.736	4.30853	1	67.5167	86.5833					D			NA	140.4		Thalasso et al. 2020	Zheng et al., 2022	Thalasso F, Sepulveda-Jauregui A, Gandois L et al. (2020) Sub-oxycline methane oxidation can fully uptake CH4 produced in sediments: case study of a lake in Siberia. Scientific Reports, 10, 3423
211	Scout, United States of America	United States of America	Lake	GP	18.848	4.41759	1	60.53	-150.84	18.848				D			-	178.4		Sepulveda-Jauregui et al. 2015	Johnson et al 2022	Sepulveda-Jauregui, A., Walter Anthony, K. M., Martinez-Cruz, K., Greene, S., & Thalasso, F. (2015). Methane and carbon dioxide emissions from 40 lakes along a north-south latitudinal transect in Alaska. Biogeosciences, 12(11), 3197–3223. https://doi.org/10.5194/bg-12-3197-2015
130	Williams, United States of America	United States of America	Lake	T	16.8356	4.49039	1	46.95	-94.667	16.8356				D			NA	224.6		Michmerhuizen et al., 1996	Johnson et al 2022	Michmerhuizen, C. M., Striegl, R. G., & McDonald, M. E. (1996). Potential methane emission from north-temperate lakes following ice melt. Limnology & Oceanography, 41(5), 985–991
156	James Bay lakes, Canada	Canada	Lake	GP	17.3767	4.55443	1	49.7	-79	17.3767		7	6	D			NA	218		Rasilo et al. 2014	Johnson et al 2022	Rasilo, T., Prairie, Y. T., & del Giorgio, P. A. (2015). Largescale patterns in summer diffusive CH4 fluxes across Boreal lakes, and contributions to diffusive C emissions. Global Change Biology, 21, 1124–1139. https://doi.org/10.1111/gcb.1274
224	Rainbow Shore, United States of America	United States of America	Lake	GP	20.419	4.78581	1	61.69	-150.09		20.419			E		Yes	-	178.4		Sepulveda-Jauregui et al. 2015	Johnson et al 2022	Sepulveda-Jauregui, A., Walter Anthony, K. M., Martinez-Cruz, K., Greene, S., & Thalasso, F. (2015). Methane and carbon dioxide emissions from 40 lakes along a north-south latitudinal transect in Alaska. Biogeosciences, 12(11), 3197–3223. https://doi.org/10.5194/bg-12-3197-2015
314	GullLake, United States of America	United States of America	Lake	GP	28.2	4.91188	1	71.231	-156.672		28.2	0.5264	3.6	E		Yes	-	92.4		Engram et al. 2020	Kuhn et al., 2021	Engram, M., Walter Anthony, K.M., Sachs, T. (2020) Author Correction: Remote sensing northern lake methane ebullition. Nat. Clim. Chang. 10, 876
39	Donghu Lake, China	China	Lake	T	21.0948	4.9944	1	30.55	114.383	21.0948				D			NA	181.8		Xing et al., 2005	Johnson et al 2022	Xing Y, Xie P, Yang H et al. (2005) Methane and carbon dioxide fluxes from a shallow hypereutrophic subtropical Lake in China. Atmospheric Environment, 39, 5532-5540.
151	Chicoutimi lakes, Canada	Canada	Lake	GP	17.3767	5.02152	1	48	-71	17.3767		47	9	D			NA	256.4		Rasilo et al. 2014	Johnson et al 2022	Rasilo, T., Prairie, Y. T., & del Giorgio, P. A. (2015). Largescale patterns in summer diffusive CH4 fluxes across Boreal lakes, and contributions to diffusive C emissions. Global Change Biology, 21, 1124–1139. https://doi.org/10.1111/gcb.1274
5	L4, Brazil	Brazil	Lake	TR	325.768	5.05244	1	-19.039	-57.369	13.8423	311.925	0.1		DE	Yes		NA	365		Bastviken et al., 2010	Johnson et al 2022	Bastviken, D. et al. Methane emissions from Pantanal, South America, during the low water season: toward more comprehensive sampling. Environmental Science & Technology 44, 5450–5455 (2010).
93	Hiawatha, United States of America	United States of America	Lake	T	18.4889	5.06855	1	44.917	-93.233	18.4889				D			NA	235.2		Michmerhuizen et al., 1996	Johnson et al 2022	Michmerhuizen, C. M., Striegl, R. G., & McDonald, M. E. (1996). Potential methane emission from north-temperate lakes following ice melt. Limnology & Oceanography, 41(5), 985–991
158	CoteNord lakes, Canada	Canada	Lake	GP	18.7133	5.14316	1	50.4	-67	18.7133		5	16	D			NA	236.2		Rasilo et al. 2014	Johnson et al 2022	Rasilo, T., Prairie, Y. T., & del Giorgio, P. A. (2015). Largescale patterns in summer diffusive CH4 fluxes across Boreal lakes, and contributions to diffusive C emissions. Global Change Biology, 21, 1124–1139. https://doi.org/10.1111/gcb.1274
301	Lake S1, Russia	Russia	Lake	B	25.92	5.21148	1	70.741	147.581	25.92				D			NA	130.8		van Hardenbroek et al., 2013	Johnson et al 2022	van Hardenbroek, M., Lotter, A. F., Bastviken, D., Duc, N. T., & Heiri, O. (2012). Relationship between δ13C of chironomid remains and methane flux in Swedish lakes. Freshwater Biology, 57, 166–177. https://doi.org/10.1111/j.1365-2427.2011.02710.x
196	Võrtsjärv, Estonia	Estonia	Lake	T	20.4	5.49535	1	58.283	26.033	20.4		270	6	D			NA	228.4		Rõõm et al., 2014	Johnson et al 2022	Rõõm, E. I., Nõges, P., Feldmann, T., Tuvikene, L., Kisand, A., Teearu, H., & Nõges, T.(2014). Years are not brothers: Two-year comparison of greenhouse gas fluxes in large shallow Lake Võrtsjärv, Estonia. Journal of Hydrology, 519, 1594–1606. https://doi.org/10.1016/j.jhydrol.2014.09.011
304	Lake N8, Russia	Russia	Lake	B	27.36	5.51632	1	70.807	147.497	27.36				D			NA	131.6		van Hardenbroek et al., 2013	Johnson et al 2022	van Hardenbroek, M., Lotter, A. F., Bastviken, D., Duc, N. T., & Heiri, O. (2012). Relationship between δ13C of chironomid remains and methane flux in Swedish lakes. Freshwater Biology, 57, 166–177. https://doi.org/10.1111/j.1365-2427.2011.02710.x
67	Dillon, United States of America	United States of America	Lake	B	21.44	5.59241	1	39.606	-106.053	21.44				D			NA	216.2		Smith and Lewis, 1992	Johnson et al 2022	Smith, L. K., & Lewis, W. M. (1992). Seasonality of methane emissions from five lakes and associated wetlands of the Colorado Rockies. Global Biogeochemical Cycles, 6, 323–338.
185	Subarctic Pool, Canada	Canada	Lake	PP	27.1	5.66498	1	54.48	-66.49	27.1			0.5	D			NA	142.2		Moore and Knowles 1990	Johnson et al 2022	Moore, T. R., Heyes, A., & Roulet, N. T. (1994). Methane emissions from wetlands, Southern Hudson Bay lowland. Journal of Geophysical Research, 99, 1455–1467. https://doi.org/10.1029/93JD02457
235	LKg2,Russia	Russia	Lake	T	27.802	5.78838	1	62.3311	74.2664	27.802		0.003117	0.95	D			141	141		Serikova et al. 2019	Kuhn et al., 2021	Serikova, S., Pokrovsky, O.S., Laudon, H. (2019). High carbon emissions from thermokarst lakes of Western Siberia. Nat Commun 10, 1552
261	Kim, United States of America	United States of America	Lake	T	25.44	5.96263	1	66.516	-164.251		25.44	0.6082	3.3	E		Yes	-	178.4		Engram et al. 2020	Kuhn et al., 2021	Engram, M., Walter Anthony, K.M., Sachs, T. (2020) Author Correction: Remote sensing northern lake methane ebullition. Nat. Clim. Chang. 10, 876
210	Engineer, United States of America	United States of America	Lake	GP	25.654	6.01278	1	60.48	-150.32	25.654		0.909	3.9	D			-	178.4		Sepulveda-Jauregui et al. 2015	Johnson et al 2022	Sepulveda-Jauregui, A., Walter Anthony, K. M., Martinez-Cruz, K., Greene, S., & Thalasso, F. (2015). Methane and carbon dioxide emissions from 40 lakes along a north-south latitudinal transect in Alaska. Biogeosciences, 12(11), 3197–3223. https://doi.org/10.5194/bg-12-3197-2015
209	Lower Ohmer, United States of America	United States of America	Lake	GP	26.178	6.1356	1	60.46	-150.32	18.848	7.33	0.471	28	DE			-	178.4		Sepulveda-Jauregui et al. 2015	Johnson et al 2022	Sepulveda-Jauregui, A., Walter Anthony, K. M., Martinez-Cruz, K., Greene, S., & Thalasso, F. (2015). Methane and carbon dioxide emissions from 40 lakes along a north-south latitudinal transect in Alaska. Biogeosciences, 12(11), 3197–3223. https://doi.org/10.5194/bg-12-3197-2015
197	Skottenesjön, Sweden	Sweden	Lake	T	22.4514	6.30884	8	58.3545	12.1318	6.53869	19.1201	0.4909	3.6	D			245	245	Eutrophic	Rinta et al., 2016; Natchimuthu et al 2016	Johnson et al 2022; this study	Rinta, P., Bastviken, D., Schilder, J., Van Hardenbroek, M., Stötter, T., & Heiri, O. (2017). Higher late summer methane emission from central than northern European lakes. Journal of Limnology, 76, 52–67.; Natchimuthu, S., Sundgren, I., Gålfalk, M., Klemedtsson, L., Crill, P., Danielsson, Å., & Bastviken, D. (2016). Spatio-temporal variability of lake CH4 fluxes and its influence on annual whole…
131	Seelisbergsee, Switzerland	Switzerland	Lake	T	17.8044	6.49861	1	46.96	8.57	11.7092	6.0952	0.17	38	DE			NA	365	Oligotrophic	Rinta et al., 2016	Johnson et al 2022	Rinta, P., Bastviken, D., Schilder, J., Van Hardenbroek, M., Stötter, T., & Heiri, O. (2017). Higher late summer methane emission from central than northern European lakes. Journal of Limnology, 76, 52–67.
264	Grayling, United States of America	United States of America	Lake	GP	38.461	6.52145	1	66.95	-150.39	20.192	18.269	0.401	1.8	DE			-	85.8		Sepulveda-Jauregui et al. 2015	Johnson et al 2022	Sepulveda-Jauregui, A., Walter Anthony, K. M., Martinez-Cruz, K., Greene, S., & Thalasso, F. (2015). Methane and carbon dioxide emissions from 40 lakes along a north-south latitudinal transect in Alaska. Biogeosciences, 12(11), 3197–3223. https://doi.org/10.5194/bg-12-3197-2015
17	Lake Curuai, Brazil	Brazil	Lake	TR	18.08	6.5992	1	-2.179	-55.233	18.08				D			NA	365		Sawakuchi et al., 2014	Johnson et al 2022	Sawakuchi HO, Bastviken D, Sawakuchi AO et al. (2014) Methane emissions from Amazonian Rivers and their contribution to the global methane budget. Global Change Biology, 20, 2829-2840.
63	Qinghai Lake-2, Tibetan Plateau, China	China	Lake	GP	28.8	6.68966	1	37.1667	99.75					D			NA	175.4		Yan et al. 2018	Zheng et al., 2022	Yan F, Sillanpää M, Kang S et al. (2018) Lakes on the Tibetan Plateau as conduits of greenhouse gases to the atmosphere. Journal of Geophysical Research: Biogeosciences, 123, 2091-2103.
214	Dolly Varden, United States of America	United States of America	Lake	GP	29.319	6.87179	1	60.7	-150.79	16.754	12.565	1.074	30	DE			-	178.4		Sepulveda-Jauregui et al. 2015	Johnson et al 2022	Sepulveda-Jauregui, A., Walter Anthony, K. M., Martinez-Cruz, K., Greene, S., & Thalasso, F. (2015). Methane and carbon dioxide emissions from 40 lakes along a north-south latitudinal transect in Alaska. Biogeosciences, 12(11), 3197–3223. https://doi.org/10.5194/bg-12-3197-2015
154	Abitibi lakes, Canada	Canada	Lake	GP	26.7333	6.92072	1	48.5	-79	26.7333		41	4	D			NA	213.4		Rasilo et al. 2014	Johnson et al 2022	Rasilo, T., Prairie, Y. T., & del Giorgio, P. A. (2015). Largescale patterns in summer diffusive CH4 fluxes across Boreal lakes, and contributions to diffusive C emissions. Global Change Biology, 21, 1124–1139. https://doi.org/10.1111/gcb.1274
35	Yamzho Yumco Lake, Tibetan Plateau, China	China	Lake	GP	19.2	7.008	1	29.1667	90.5167					D			NA	365		Yan et al. 2018	Zheng et al., 2022	Yan F, Sillanpää M, Kang S et al. (2018) Lakes on the Tibetan Plateau as conduits of greenhouse gases to the atmosphere. Journal of Geophysical Research: Biogeosciences, 123, 2091-2103.
221	Mosquito Lake, United States of America	United States of America	Lake	GP	30	7.0314	1	61.11	-149.49	30				D			-	178.4		Phelps et al. 1998	Johnson et al 2022	Phelps, A.R., Peterson, K.M., Jeffries, M.O. (1998) Methane efflux from high latitude lakes during spring ice melt. JGR, 103 (22), 29- 36
242	Swampbuggy, United States of America	United States of America	Lake	GP	30.769	7.21164	1	63.06	-147.42	6.154	24.615	0.142	4.9	DE			-	178.4		Sepulveda-Jauregui et al. 2015	Johnson et al 2022	Sepulveda-Jauregui, A., Walter Anthony, K. M., Martinez-Cruz, K., Greene, S., & Thalasso, F. (2015). Methane and carbon dioxide emissions from 40 lakes along a north-south latitudinal transect in Alaska. Biogeosciences, 12(11), 3197–3223. https://doi.org/10.5194/bg-12-3197-2015
100	Isac, Romania	Romania	Lake	T	30.72	7.26897	1	45.123	29.282	30.72				D			NA	181.6		Pavel et al., 2008	Johnson et al 2022	Pavel, A. P. (2008) Simple Model for Monitoring Balkhash Lake Water Levels and Ili River Discharges: Application of Remote Sensing. Lake Reserv. Res. Manag., 13 (1), 77– 81
142	Hüttwilersee, Switzerland	Switzerland	Lake	T	20.05	7.31825	1	47.61	8.84	9.624	10.426	0.34	16	DE			NA	365	Mesotrophic	Rinta et al., 2016	Johnson et al 2022	Rinta, P., Bastviken, D., Schilder, J., Van Hardenbroek, M., Stötter, T., & Heiri, O. (2017). Higher late summer methane emission from central than northern European lakes. Journal of Limnology, 76, 52–67.
232	LKg16,Russia	Russia	Lake	T	35.291	7.34759	1	62.255	74.2717	35.291		0.007819	1.2	D			141	141		Serikova et al. 2019	Kuhn et al., 2021	Serikova, S., Pokrovsky, O.S., Laudon, H. (2019). High carbon emissions from thermokarst lakes of Western Siberia. Nat Commun 10, 1552
69	Longtan Lake, China	China	Lake	T	31.8742	7.43498	1	39.876	116.435	31.8742				D			NA	176.8		Ai et al., 2009	Johnson et al 2022	Ai, Y. (2009). Temporal and spatial variation of methane emissions from urban lakes in Beijing and its relationship with hydrological water quality. Master thesis. (in Chinese).
47	Xuanwu Lake, Jiangsu, China	China	Lake	GP	32.7381	7.63649	4	32.05	118.8					DE			NA	176.8		Zhao et al. 2017	Zheng et al., 2022	Zhao Z, Zhang D, Shi W et al. (2017) Understanding the spatial heterogeneity of CO2 and CH4 fluxes from an urban shallow lake: Correlations with environmental factors. Journal of Chemistry, 2017, 1-19.
237	LKg5,Russia	Russia	Lake	T	36.797	7.66114	1	62.34	74.2386	36.797		0.000245	0.9	D			141	141		Serikova et al. 2019	Kuhn et al., 2021	Serikova, S., Pokrovsky, O.S., Laudon, H. (2019). High carbon emissions from thermokarst lakes of Western Siberia. Nat Commun 10, 1552
141	Türlersee, Switzerland	Switzerland	Lake	T	22.2956	8.13789	1	47.27	8.5	21.3332	0.9624	0.48	25	DE			NA	365	Oligotrophic	Rinta et al., 2016	Johnson et al 2022	Rinta, P., Bastviken, D., Schilder, J., Van Hardenbroek, M., Stötter, T., & Heiri, O. (2017). Higher late summer methane emission from central than northern European lakes. Journal of Limnology, 76, 52–67.
24	Thimmapuram, India	India	Lake	TR	23.496	8.57604	1	12.45	78.22	23.496				D			NA	365		Attermeyer et al., 2016	Johnson et al 2022	Attermeyer K, Flury S, Jayakumar R et al. (2016) Invasive floating macrophytes reduce greenhouse gas emissions from a small tropical lake. Scientific Reports, 6, 20424
101	Beaver Pond Harp4, Canada	Canada	Lake	T	34.6272	9.10972	1	45.383	-79.133	34.6272				D			NA	219.4		Weyhenmeyer 1999	Johnson et al 2022	West, W. E., Creamer, K. P., & Jones, S. E. (2016). Productivity and depth regulate lake contributions to atmospheric methane: Lake productivity fuels methane emissions. Limnology & Oceanography, 61, 1–11. https://doi.org/10.1002/lno.10247
74	Zizhuyuan Lake, China	China	Lake	T	39.9099	9.30938	1	39.941	116.311	39.9099				D			NA	176.8		Ai et al., 2009	Johnson et al 2022	Ai, Y. (2009). Temporal and spatial variation of methane emissions from urban lakes in Beijing and its relationship with hydrological water quality. Master thesis. (in Chinese).
241	Kevätön, Finland	Finland	Lake	GP	37.4267	9.32224	2	63.06	27.38	37.4267		4.3	10.1	D			NA	199.4		Juutinen et al. 2003; Larmola et al. 2004	Johnson et al 2022; Kuhn et al., 2021	Juutinen, S. et al. Major implication of the littoral zone for methane release from boreal lakes. Global Biogeochemical Cycles 17, (2003).; Larmola, T., Alm, J., Juutinen S., Hutttunen, J.T., Martikainen P.J., Silvola J. (2004). Contribution of vegetated littoral zone to winter fluxes of carbon dioxide and methane from boreal lakes. JGR: Atmosphere. 109 (D19)
228	Montana, United States of America	United States of America	Lake	GP	39.791	9.32621	1	62.14	-150.05	18.325	21.466	0.3	9	DE			-	178.4		Sepulveda-Jauregui et al. 2015	Johnson et al 2022	Sepulveda-Jauregui, A., Walter Anthony, K. M., Martinez-Cruz, K., Greene, S., & Thalasso, F. (2015). Methane and carbon dioxide emissions from 40 lakes along a north-south latitudinal transect in Alaska. Biogeosciences, 12(11), 3197–3223. https://doi.org/10.5194/bg-12-3197-2015
82	Onodaga, United States of America	United States of America	Lake	T	32.4326	9.55399	15	43.089	-76.208	2.2968	32.2975			DE			NA	264.4		Addess et al., 1996; Matthews et al., 2005	Johnson et al 2022	Addess, J. M., & Effler, S. W. (1996). Summer methane fluxes and fall oxygen resources of Onondaga Lake. Lake and Reservoir Management, 12, 91–101. https://doi.org/10.1080/07438149609354000
134	Shingobee Lake, United States of America	United States of America	Lake	T	36.5877	9.75867	2	47.0015	-94.686	36.5877				D			NA	224.6		Michmerhuizen et al., 1996; Striegl et al., 1998	Johnson et al 2022	Michmerhuizen, C. M., Striegl, R. G., & McDonald, M. E. (1996). Potential methane emission from north-temperate lakes following ice melt. Limnology & Oceanography, 41(5), 985–991; Striegl, R. G., & Michmerhuisen, C. M. (1998). Hydrologic influence on methane and carbon dioxide dynamics at two North-Central Minnesota lakes. Limnology and Oceanography, 43, 1519–1529
217	ABLE, United States of America	United States of America	Lake	B	43.996	10.3118	2	61.06	-162.01	43.996			1	D			-	178.4		Dove et al., 1999; Fan et al. 1992	Johnson et al 2022; Kuhn et al., 2021	Dove, A., Roulet, N., Crill, P., Chanton, J., & Bourbonniere, R. (1999). Methane dynamics of a Northern Boreal Beaver Pond. Écoscience, 6(4), 577–586. https://doi.org/10.1080/11956860.1999.11682548 ;
195	Hargsjön, Sweden	Sweden	Lake	T	29.9948	10.6164	1	58.27	15.24	2.5664	27.4284	0.99	6	DE			NA	349.2	Eutrophic	Rinta et al., 2016	Johnson et al 2022	Rinta, P., Bastviken, D., Schilder, J., Van Hardenbroek, M., Stötter, T., & Heiri, O. (2017). Higher late summer methane emission from central than northern European lakes. Journal of Limnology, 76, 52–67.
75	Kunming Lake, China	China	Lake	T	46.3334	10.8077	1	39.991	116.267	46.3334				D			NA	176.8		Ai et al., 2009	Johnson et al 2022	Ai, Y. (2009). Temporal and spatial variation of methane emissions from urban lakes in Beijing and its relationship with hydrological water quality. Master thesis. (in Chinese).
176	Grosse Fuchskuhle, Germany	Germany	Lake	T	31.2	10.9949	1	53.167	13.033		31.2			E		Yes	NA	347		Casper et al., 2003	Johnson et al 2022	Casper, P., Chan, O. C., Furtado, A. L. S., & Adams, D. D. (2003). Methane in an acidic bog lake: The influence of peat in the catchment on the biogeochemistry of methane. Aquatic Sciences, 65, 36–46. https://doi.org/10.1007/s000270300003
73	Shishahai Lake, China	China	Lake	T	47.9302	11.1802	1	39.94	116.38	47.9302				D			NA	176.8		Ai et al., 2009	Johnson et al 2022	Ai, Y. (2009). Temporal and spatial variation of methane emissions from urban lakes in Beijing and its relationship with hydrological water quality. Master thesis. (in Chinese).
267	Jonas, United States of America	United States of America	Lake	GP	67.308	11.4127	1	67.65	-149.72		67.308			E		Yes	-	85.8		Sepulveda-Jauregui et al. 2015	Johnson et al 2022	Sepulveda-Jauregui, A., Walter Anthony, K. M., Martinez-Cruz, K., Greene, S., & Thalasso, F. (2015). Methane and carbon dioxide emissions from 40 lakes along a north-south latitudinal transect in Alaska. Biogeosciences, 12(11), 3197–3223. https://doi.org/10.5194/bg-12-3197-2015
6	L3, Brazil	Brazil	Lake	TR	31.5101	11.5012	1	-19.031	-57.473	11.4322	20.0779	0.35		DE			NA	365		Bastviken et al., 2010	Johnson et al 2022	Bastviken, D. et al. Methane emissions from Pantanal, South America, during the low water season: toward more comprehensive sampling. Environmental Science & Technology 44, 5450–5455 (2010).
71	Yuyuantan Lake, China	China	Lake	T	50.1293	11.6932	1	39.916	116.314	50.1293				D			NA	176.8		Ai et al., 2009	Johnson et al 2022	Ai, Y. (2009). Temporal and spatial variation of methane emissions from urban lakes in Beijing and its relationship with hydrological water quality. Master thesis. (in Chinese).
164	Williams Lake, Canada	Canada	Lake	B	43.5641	11.9671	1	52.116	-122.071	43.5641				D			NA	236		Striegl et al., 1998	Johnson et al 2022	Striegl, R. G., & Michmerhuisen, C. M. (1998). Hydrologic influence on methane and carbon dioxide dynamics at two North-Central Minnesota lakes. Limnology and Oceanography, 43, 1519–1529
107	Lakes, Canada	Canada	Lake	T	46.1333	12.1238	1	45.991	-74.006	35.2	10.9333			DE			NA	219		DelSontro et al., 2016	Johnson et al 2022	DelSontro T, Boutet L, Annick SP et al. (2016) Methane ebullition and diffusion from northern ponds and lakes regulated by the interaction between temperature and system productivity. Limnology and Oceanography, 61, S62-S77.;Engle, D., & Melack, J. M. (2000). Methane emissions from an Amazon floodplain lake: Enhanced release during episodic mixing and during falling water. Biogeochemistry, 51, 71…
252	Otto, United States of America	United States of America	Lake	GP	53.846	12.6204	1	63.84	-149.04	37.692	16.154	0.515	3.1	DE			-	178.4		Sepulveda-Jauregui et al. 2015	Johnson et al 2022	Sepulveda-Jauregui, A., Walter Anthony, K. M., Martinez-Cruz, K., Greene, S., & Thalasso, F. (2015). Methane and carbon dioxide emissions from 40 lakes along a north-south latitudinal transect in Alaska. Biogeosciences, 12(11), 3197–3223. https://doi.org/10.5194/bg-12-3197-2015
175	Doosje, Netherlands	Netherlands	Lake	T	34.8187	12.7088	1	52.733	6.26	34.8187			0.43	D		Yes	NA	365	Mesotrohpic drianage ditches	Schrier-Uijl et al., 2011	Johnson et al 2022	Schrier-Uijl, A. P., Veraart, A. J., Leffelaar, P. A., Berendse, F., & Veenendaal, E. M.(2011). Release of CO2 and CH4 from lakes and drainage ditches in temperate wetlands. Biogeochemistry, 102, 265–279. https://doi.org/10.1007/s10533-010-9440-7
257	3Loon, United States of America	United States of America	Lake	T	57.38	13.4487	1	66.497	-164.254		57.38	0.0788	9	E		Yes	-	178.4		Engram et al. 2020	Kuhn et al., 2021	Engram, M., Walter Anthony, K.M., Sachs, T. (2020) Author Correction: Remote sensing northern lake methane ebullition. Nat. Clim. Chang. 10, 876
76	Fuhai Lake, China	China	Lake	T	58.4731	13.6394	1	40	116.304	58.4731				D			NA	176.8		Ai et al., 2009	Johnson et al 2022	Ai, Y. (2009). Temporal and spatial variation of methane emissions from urban lakes in Beijing and its relationship with hydrological water quality. Master thesis. (in Chinese).
146	Königseggsee, Germany	Germany	Lake	TH	37.8	13.797	1	47.9321	9.44842	37.8				D			NA	365		Encinas Fernández et al., 2016	Johnson et al 2022	Encinas Fernández, J., Hofmann, H., & Peeters, F. (2014). Importance of the autumn overturn and anoxic conditions in the hypolimnion for the annual methane enissions from a temperate lake. Environmental Science and Technology, 48, 7297–7304. https://doi.org/10.1021/es4056164
258	Jaeger, United States of America	United States of America	Lake	T	62.4	14.6253	1	66.501	-164.261		62.4	0.2221	13.3	E		Yes	-	178.4		Engram et al. 2020	Kuhn et al., 2021	Engram, M., Walter Anthony, K.M., Sachs, T. (2020) Author Correction: Remote sensing northern lake methane ebullition. Nat. Clim. Chang. 10, 876
182	Schöhsee, Germany	Germany	Lake	T	44.11	14.6489	1	54.17	10.44	15.7192	28.3908	0.75	29	DE			NA	318	Mesotrophic	Rinta et al., 2016	Johnson et al 2022	Rinta, P., Bastviken, D., Schilder, J., Van Hardenbroek, M., Stötter, T., & Heiri, O. (2017). Higher late summer methane emission from central than northern European lakes. Journal of Limnology, 76, 52–67.
170	Vinkeveense plas, Netherlands	Netherlands	Lake	T	43.5233	15.886	1	52.235	4.989	43.5233		10.79	2.4	D			NA	365	Eutrophic	Schrier-Uijl et al., 2011	Johnson et al 2022	Schrier-Uijl, A. P., Veraart, A. J., Leffelaar, P. A., Berendse, F., & Veenendaal, E. M.(2011). Release of CO2 and CH4 from lakes and drainage ditches in temperate wetlands. Biogeochemistry, 102, 265–279. https://doi.org/10.1007/s10533-010-9440-7
262	Claudi, United States of America	United States of America	Lake	TH	72.7167	17.0433	3	66.549	-164.451		72.7167	1e-05		E		Yes	-	178.4		Engram et al. 2020; Walter Anthony and Anthony 2013	Kuhn et al., 2021; Johnson et al 2022	Engram, M., Walter Anthony, K.M., Sachs, T. (2020) Author Correction: Remote sensing northern lake methane ebullition. Nat. Clim. Chang. 10, 876 ; Walter Anthony, K. M., & Anthony, P. (2013). Constraining spatial variability of methane ebullition seeps in thermokarst lakes using point process models. Journal of Geophysical Research: Biogeosciences, 118, 1015–1034.
108	Laurentians lakes, Canada	Canada	Lake	GP	65.4967	17.2125	1	46	-74	65.4967		1	10	D			NA	219		Rasilo et al. 2014	Johnson et al 2022	Rasilo, T., Prairie, Y. T., & del Giorgio, P. A. (2015). Largescale patterns in summer diffusive CH4 fluxes across Boreal lakes, and contributions to diffusive C emissions. Global Change Biology, 21, 1124–1139. https://doi.org/10.1111/gcb.1274
153	Mindelsee, Germany	Germany	Lake	T	47.634	17.3864	6	48.3755	9.01265	47.634				D			NA	365		Encinas Fernández et al., 2016; Encinas Fernández et al., 2014	Johnson et al 2022	Encinas Fernández, J., Hofmann, H., & Peeters, F. (2014). Importance of the autumn overturn and anoxic conditions in the hypolimnion for the annual methane enissions from a temperate lake. Environmental Science and Technology, 48, 7297–7304. https://doi.org/10.1021/es4056164
263	Rhonda, United States of America	United States of America	Lake	T	77.8	18.2348	1	66.566	-164.466		77.8	0.7474	1.6	E		Yes	-	178.4		Engram et al. 2020	Kuhn et al., 2021	Engram, M., Walter Anthony, K.M., Sachs, T. (2020) Author Correction: Remote sensing northern lake methane ebullition. Nat. Clim. Chang. 10, 876
136	Soppensee, Switzerland	Switzerland	Lake	T	50.0833	18.2804	1	47.09	8.08	25.6426	24.4406	0.23	26	DE			NA	365	Eutrophic	Vachon et al. 2019	Rosentreter et al., 2021	Vachon, D., Langenegger, T., Donis, D., & McGinnis, D. F. (2019). Influence of water column stratification and mixing patterns on the fate of methane produced in deep sediments of a small eutrophic lake. Limnology and Oceanography, 64, 2114–2128.
215	Rainbow, United States of America	United States of America	Lake	GP	79.058	18.5296	1	60.72	-150.81		79.058			E		Yes	-	178.4		Sepulveda-Jauregui et al. 2015	Johnson et al 2022	Sepulveda-Jauregui, A., Walter Anthony, K. M., Martinez-Cruz, K., Greene, S., & Thalasso, F. (2015). Methane and carbon dioxide emissions from 40 lakes along a north-south latitudinal transect in Alaska. Biogeosciences, 12(11), 3197–3223. https://doi.org/10.5194/bg-12-3197-2015
72	Chaoyang Park Lake, China	China	Lake	T	79.8426	18.6241	1	39.936	116.472	79.8426				D			NA	176.8		Ai et al., 2009	Johnson et al 2022	Ai, Y. (2009). Temporal and spatial variation of methane emissions from urban lakes in Beijing and its relationship with hydrological water quality. Master thesis. (in Chinese).
61	Xingxinghai Lake, Tibetan Plateau, China	China	Lake	GP	83.2	19.3839	1	36.5667	100.533					D			NA	176.4		Yan et al. 2018	Zheng et al., 2022	Yan F, Sillanpää M, Kang S et al. (2018) Lakes on the Tibetan Plateau as conduits of greenhouse gases to the atmosphere. Journal of Geophysical Research: Biogeosciences, 123, 2091-2103.
181	Holzsee, Germany	Germany	Lake	T	60.15	19.9758	1	54.16	10.18	11.5488	48.6012	0.19	7	DE			NA	318	Eutrophic	Rinta et al., 2016	Johnson et al 2022	Rinta, P., Bastviken, D., Schilder, J., Van Hardenbroek, M., Stötter, T., & Heiri, O. (2017). Higher late summer methane emission from central than northern European lakes. Journal of Limnology, 76, 52–67.
28	Lago Umecuaro, Mexico	Mexico	Lake	T	57.8	21.097	1	19.523	-101.243	57.8				D			NA	365		Gonzalez-Valencia et al., 2014	Johnson et al 2022	Gonzalez-Valencia R, Sepulveda-Jauregui A, Martinez-Cruz K et al. (2014) Methane emissions from Mexican freshwater bodies: correlations with water pollution. Hydrobiologia, 721, 9-22.
129	Jacques, Canada	Canada	Lake	T	72.581	21.9804	8	46.888	-72.093	35.288	37.293			DE			NA	276.2		Bartosiewicz et al., 2015	Johnson et al 2022	Bartosiewicz M, Laurion I, Macintyre S (2015) Greenhouse gas emission and storage in a small shallow lake. Hydrobiologia, 757, 101-115.
138	Burgäschisee, Switzerland	Switzerland	Lake	T	60.3104	22.0133	1	47.17	7.67	18.2856	42.0248	0.2	30	DE			NA	365	Mesotrophic	Rinta et al., 2016	Johnson et al 2022	Rinta, P., Bastviken, D., Schilder, J., Van Hardenbroek, M., Stötter, T., & Heiri, O. (2017). Higher late summer methane emission from central than northern European lakes. Journal of Limnology, 76, 52–67.
26	Kolavai Lake, India	India	Lake	TR	62.24	22.7176	1	12.701	79.991	22.4	39.84			DE			NA	365		Selvam et al., 2014	this study	Selvam, B., Natchimuthu, S., Arunachalam, L., & Bastviken, D. (2014). Methane and carbon dioxide emissions from inland waters in India – Implications for large scale greenhouse gas balances. Global Change Biology, 2, 3397–3407. https://doi.org/10.1111/gcb.12575
223	Lake Ekojärvi, Finland	Finland	Lake	B	90.838	23.2364	1	61.303	23.205	90.838				D			NA	209		Kankaala et al., 2003	Johnson et al 2022	Kankaala, P., Huotari, J., Tulonen, T., & Ojala, A. (2013). Lake-size dependent physical forcing drives carbon dioxide and methane effluxes from lakes in a Boreal landscape. Limnology and Oceanography, 58, 1915–1930. https://doi.org/10.4319/lo.2013.58.6.1915
16	Lago Calado, Brazil	Brazil	Lake	TR	64.8187	23.6588	5	-3.3075	-60.5633	61.652	4.75			D			NA	365		Crill et al., 1988; Bartlett et al., 1988; Engle et al., 2000	Johnson et al 2022	Crill, P. M., Bartlett, K. B., Wilson, J. O., Sebacher, D. I., Harriss, R. C., Melack, J. M., et al. (1988). Tropospheric methane from an Amazonian floodplain lake. Journal of Geophysical Research, 93, 1564–1570. https://doi.org/10.1029/jd093id02p01564 ; Bartlett, K. B., Crill, P. M., Sebacher, D. I., Harriss, R. C., Wilson, J. O., & Melack, J. M. (1988). Methane flux from the central Amazonian f…
272	Tube Dispencer, Russia	Russia	Lake	TH	125.6	23.9168	1	68.45	161.2	8.2	117.4	0.0925	17	DE			NA	115.6		Walter Anthony et al. 2010	Johnson et al 2022	Walter Anthony, K. M., Vas, D. A., Brosius, L., Chapin, F. S., Zimov, S. A., & Zhuang, Q.(2010). Estimating methane emissions from northern lakes using ice-bubble surveys. Limnology and Oceanography: Methods, 8(11), 592–609. https://doi.org/10.4319/lom.2010.8.0592
41	Mapam Yumco Lake, Tibetan Plateau, China	China	Lake	GP	137.6	24.4295	1	30.7	81.3667					D			NA	97.2		Yan et al. 2018	Zheng et al., 2022	Yan F, Sillanpää M, Kang S et al. (2018) Lakes on the Tibetan Plateau as conduits of greenhouse gases to the atmosphere. Journal of Geophysical Research: Biogeosciences, 123, 2091-2103.
265	Ping, United States of America	United States of America	Lake	GP	145.192	24.6188	1	67.14	-150.37	96.154	49.038	0.102	1.4	DE			-	85.8		Sepulveda-Jauregui et al. 2015	Johnson et al 2022	Sepulveda-Jauregui, A., Walter Anthony, K. M., Martinez-Cruz, K., Greene, S., & Thalasso, F. (2015). Methane and carbon dioxide emissions from 40 lakes along a north-south latitudinal transect in Alaska. Biogeosciences, 12(11), 3197–3223. https://doi.org/10.5194/bg-12-3197-2015
174	Belterwiede, Netherlands	Netherlands	Lake	T	69.6373	25.4176	1	52.704	6.074	69.6373		6.13	1.8	D			NA	365	Mesotrophic to eutrophic	Schrier-Uijl et al., 2011	Johnson et al 2022	Schrier-Uijl, A. P., Veraart, A. J., Leffelaar, P. A., Berendse, F., & Veenendaal, E. M.(2011). Release of CO2 and CH4 from lakes and drainage ditches in temperate wetlands. Biogeochemistry, 102, 265–279. https://doi.org/10.1007/s10533-010-9440-7
30	Chilika, India	India	Lake	TR	70.08	25.5792	1	19.717	85.317	70.08				D			NA	365		Ray 2013	Johnson et al 2022	Ray, A. K. (2013). Biogeochemical fluxes of carbon and nitrogen from Chilika Lake East Coast of India. Ph.D. Thesis, (p. 106). Anna University .
183	Plusssee, Germany	Germany	Lake	T	81.4832	27.0606	1	54.18	10.44	8.822	72.6612	0.14	29	D			NA	318	Eutrophic	Rinta et al., 2016	Johnson et al 2022	Rinta, P., Bastviken, D., Schilder, J., Van Hardenbroek, M., Stötter, T., & Heiri, O. (2017). Higher late summer methane emission from central than northern European lakes. Journal of Limnology, 76, 52–67.
15	Pesqueiro, Brazil	Brazil	Lake	TR	76.3333	27.8617	3	-3.355	-60.625	76.3333	1345.5			DE	Yes		NA	365		Bartlett et al., 1988	Johnson et al 2022	Bartlett, K. B., Crill, P. M., Sebacher, D. I., Harriss, R. C., Wilson, J. O., & Melack, J. M.(1988). Methane flux from the central Amazonian floodplain. Journal of Geophysical Research, 93(D2), 1574–1582. https://doi.org/10.1029/JD093iD02p01571
12	TR, Brazil	Brazil	Lake	TR	76.8229	28.0404	1	-17.853	-57.482	8.3517	68.4712	71.4		DE			NA	365		Bastviken et al., 2010	Johnson et al 2022	Bastviken, D. et al. Methane emissions from Pantanal, South America, during the low water season: toward more comprehensive sampling. Environmental Science & Technology 44, 5450–5455 (2010).
103	Ward, United States of America	United States of America	Lake	T	105.607	28.3006	1	45.605	-92.32	8.8358	96.7714	0.027	8.2	DE			NA	226.4		Bastviken et al., 2004	Johnson et al 2022	Bastviken, D., Cole, J., Pace, M. & Tranvik, L. Methane emissions from lakes: Dependence of lake characteristics, two regional assessments, and a global estimate. Global Biogeochemical Cycles 18, (2004).
25	Madhurandhagam Lake, India	India	Lake	TR	83.04	30.3096	1	12.532	79.885	36.8	46.24			DE			NA	365		Selvam et al., 2014	this study	Selvam, B., Natchimuthu, S., Arunachalam, L., & Bastviken, D. (2014). Methane and carbon dioxide emissions from inland waters in India – Implications for large scale greenhouse gas balances. Global Change Biology, 2, 3397–3407. https://doi.org/10.1111/gcb.12575
278	Arctic Meltponds,Canada	Canada	Lake	T	137.33	30.4186	1	69.36	-133.04	137.33	0	1e-05	0.43	DE			160	160		Martin et al. 2017	Kuhn et al., 2021	Martin, A.F., Lantz, T.C., Humphreys, E.R., (2017). Ice wedge degradation and CO2 and CH4 emissions in the Tuktoyaktuk Coastlands, Northwest Territories. Arctic Science., 4 (1)
89	Foster, United States of America	United States of America	Lake	T	93.645	30.9946	1	44.417	-122.668		93.645	4.9	0	E		Yes	NA	316.4		Walter Anthony et al 2016	Johnson et al 2022	Walter Anthony, K., Daanen, R., Anthony, P. et al. Methane emissions proportional to permafrost carbon thawed in Arctic lakes since the 1950s. Nature Geosci 9, 679–682 (2016).
13	BB, Brazil	Brazil	Lake	TR	85.6287	31.2545	1	-17.838	-57.393	7.8869	77.7418	36.3		DE			NA	365		Bastviken et al., 2010	Johnson et al 2022	Bastviken, D. et al. Methane emissions from Pantanal, South America, during the low water season: toward more comprehensive sampling. Environmental Science & Technology 44, 5450–5455 (2010).
163	Reeuwijkse plas, Netherlands	Netherlands	Lake	T	87.0466	31.772	1	52.042	4.817	87.0466		9.27	2.1	D			NA	365	Eutrophic	Schrier-Uijl et al., 2011	Johnson et al 2022	Schrier-Uijl, A. P., Veraart, A. J., Leffelaar, P. A., Berendse, F., & Veenendaal, E. M.(2011). Release of CO2 and CH4 from lakes and drainage ditches in temperate wetlands. Biogeochemistry, 102, 265–279. https://doi.org/10.1007/s10533-010-9440-7
165	Nieuwkoopse plas, Netherlands	Netherlands	Lake	T	87.0466	31.772	1	52.141	4.852	87.0466		6.76	2.5	D			NA	365	Eutrophic	Schrier-Uijl et al., 2011	Johnson et al 2022	Schrier-Uijl, A. P., Veraart, A. J., Leffelaar, P. A., Berendse, F., & Veenendaal, E. M.(2011). Release of CO2 and CH4 from lakes and drainage ditches in temperate wetlands. Biogeochemistry, 102, 265–279. https://doi.org/10.1007/s10533-010-9440-7
135	Rotsee, Switzerland	Switzerland	Lake	T	87.2566	31.8487	2	47.07	8.312	43.708	87.0972	0.44	16	DE			NA	365		Rinta et al., 2016; Schubert et al., 2012	Johnson et al 2022	Rinta, P., Bastviken, D., Schilder, J., Van Hardenbroek, M., Stötter, T., & Heiri, O. (2017). Higher late summer methane emission from central than northern European lakes. Journal of Limnology, 76, 52–67.Schubert, C. J., Diem, T., & Eugster, W. (2012). Methane emissions from a small wind shielded lake determined by eddy covariance, flux chambers, anchored funnels, and boundary model calculations…
78	Wuliangsu Lake, Inner Mongolia, China	Inner Mongolia, China	Lake	GP	136.64	32.3509	3	40.9167	108.833					D			NA	181.8		Duan et al. 2005	Zheng et al., 2022	Duan X, Wang X, Mu Y et al. (2005) Seasonal and diurnal variations in methane emissions from Wuliangsu Lake in arid regions of China. Atmospheric Environment, 39, 4479-4487.
65	Harsha Lake, United States of America	United States of America	Lake	T	105.12	32.953	1	39.023	-84.15		105.12			E		Yes	NA	291.4		Beaulieu et al., 2016	Johnson et al 2022	Beaulieu, J.J., McManus, M.G., Nietch, C.T. (2016). Estimates of reservoir methane emissions based on a spatially balanced probabilistic-survey. Linmnol. Oceanogr. 2016, S27-S40
128	Gerzensee, Switzerland	Switzerland	Lake	T	99.1564	36.1921	11	46.83	7.54727	36.7462	98.0731	0.24	11	DE			NA	365	Mesotrophic	Rinta et al., 2016; Schilder et al., 2016	Johnson et al 2022	Rinta, P., Bastviken, D., Schilder, J., Van Hardenbroek, M., Stötter, T., & Heiri, O. (2017). Higher late summer methane emission from central than northern European lakes. Journal of Limnology, 76, 52–67.
70	Lianhuachi Lake, China	China	Lake	T	159.425	37.1874	1	39.891	116.309	159.425				D			NA	176.8		Ai et al., 2009	Johnson et al 2022	Ai, Y. (2009). Temporal and spatial variation of methane emissions from urban lakes in Beijing and its relationship with hydrological water quality. Master thesis. (in Chinese).
55	Huahu Lake, Qinghai-Tibetan Plateau, China	China	Lake	GP	164.8	38.3951	3	33.9333	102.867			3.85e-05	0.623333	DE			NA	176.4		Chen et al. 2009	Zheng et al., 2022	Chen H, Wu N, Yao S et al. (2009) High methane emissions from a littoral zone on the Qinghai-Tibetan Plateau. Atmospheric Environment, 43, 4995-5000
22	Aguas Negras, Colombia	Colombia	Lake	TR	107.448	39.2185	1	10.825	-74.61	107.448				D			NA	365		Konnerup et al., 2014	Johnson et al 2022	Konnerup, D., Betancourt-Portela, J. M., Villamil, C., & Parra, J. P. (2014). Nitrous oxide and methane emissions from the restored mangrove ecosystem of the Ciénaga Grande de Santa Marta, Colombia. Estuarine, Coastal and Shelf Science, 140, 43–51. https://doi.org/10.1016/j.ecss.2014.01.006
7	L2, Brazil	Brazil	Lake	TR	109.522	39.9756	1	-19.026	-57.543	11.1955	98.3267	0.12		DE			NA	365		Bastviken et al., 2010	Johnson et al 2022	Bastviken, D. et al. Methane emissions from Pantanal, South America, during the low water season: toward more comprehensive sampling. Environmental Science & Technology 44, 5450–5455 (2010).
77	Honglingjin Lake, China	China	Lake	T	182.418	42.5509	1	40.321	116.609	182.418				D			NA	176.8		Ai et al., 2009	Johnson et al 2022	Ai, Y. (2009). Temporal and spatial variation of methane emissions from urban lakes in Beijing and its relationship with hydrological water quality. Master thesis. (in Chinese).
145	Rohrsee, Germany	Germany	Lake	TH	118.7	43.3255	1	47.8746	9.83826	118.7				D			NA	365		Encinas Fernández et al., 2016	Johnson et al 2022	Encinas Fernández, J., Hofmann, H., & Peeters, F. (2014). Importance of the autumn overturn and anoxic conditions in the hypolimnion for the annual methane enissions from a temperate lake. Environmental Science and Technology, 48, 7297–7304. https://doi.org/10.1021/es4056164
144	Lake Neusiedl, Austria	Austria	Lake	T	139.644	45.5741	3	47.8667	16.7667	13.323	126.321			DE			NA	309.8		Soja et al. 2014	Zheng et al., 2022	Soja G, Kitzler B, Soja AM (2014) Emissions of greenhouse gases from Lake Neusiedl, a shallow steppe lake in Eastern Austria. Hydrobiologia, 731, 125-138
125	Uebeschisee, Switzerland	Switzerland	Lake	T	126.876	46.3099	1	46.73	7.57	76.19	50.6864	0.14	15	DE			NA	365	Mesotrophic	Rinta et al., 2016	Johnson et al 2022	Rinta, P., Bastviken, D., Schilder, J., Van Hardenbroek, M., Stötter, T., & Heiri, O. (2017). Higher late summer methane emission from central than northern European lakes. Journal of Limnology, 76, 52–67.
226	KY, Russia	Russia	Lake	TH	255.2	47.6305	1	62	129.44	255.2				D			NA	110.2		Nakayama et al. 1994	Johnson et al 2022	Nakayama, T., Nojiri, Y., & Zeng, Y. (1994). Measurement of methane flux from alasses around Yakutsk, Eastern Siberia in 1993, In G. Inoue (Ed.). Proceedings of the second symposium on the joint siberian permafrost studies between Japan and Russia in 1993, (pp. 40–44). National Institute for Environmental Studies, .
85	Wintergreen, United States of America	United States of America	Lake	T	496.44	48.6775	1	43.762	-73.566	160.44	336			DE	Yes		NA	277		Strayer and Tiedje 1978	Johnson et al 2022	Strayer RF, Tiedje JM (1978) In situ methane production in a small, hypereutrophic, hard-water lake: Loss of methane from sediments by vertical diffusion and ebullition. Limnology and Oceanography, 23, 1201-1206.
300	LMR-402, United States of America	United States of America	Lake	T	293.1	50.5598	1	70.73	-156.843		293.1	3.56	1	E		Yes	90	90		Townsend-Small et al. 2017	Kuhn et al., 2021	Townsend-Small, A., Åkerström, F., Arp, C. D. & Hinkel, K. M. Spatial and Temporal Variation in Methane Concentrations, Fluxes, and Sources in Lakes in Arctic Alaska: Methane in Arctic Alaskan lakes. Journal of Geophysical Research: Biogeosciences 122, 2966–2981 (2017).
173	Sint Jans, Netherlands	Netherlands	Lake	T	147.979	54.0124	1	52.684	6.06	147.979			0.28	D		Yes	NA	365	Eutrophic drianage ditches	Schrier-Uijl et al., 2011	Johnson et al 2022	Schrier-Uijl, A. P., Veraart, A. J., Leffelaar, P. A., Berendse, F., & Veenendaal, E. M.(2011). Release of CO2 and CH4 from lakes and drainage ditches in temperate wetlands. Biogeochemistry, 102, 265–279. https://doi.org/10.1007/s10533-010-9440-7
68	Taoranting Lake, China	China	Lake	T	293.06	68.3591	1	39.874	116.378	293.06				D			NA	176.8		Ai et al., 2009	Johnson et al 2022	Ai, Y. (2009). Temporal and spatial variation of methane emissions from urban lakes in Beijing and its relationship with hydrological water quality. Master thesis. (in Chinese).
40	Lhanag Tso Lake, Tibetan Plateau, China	China	Lake	GP	396.8	70.4479	1	30.6167	81.3167					D			NA	97.2		Yan et al. 2018	Zheng et al., 2022	Yan F, Sillanpää M, Kang S et al. (2018) Lakes on the Tibetan Plateau as conduits of greenhouse gases to the atmosphere. Journal of Geophysical Research: Biogeosciences, 123, 2091-2103.
23	Cano Grande, Colombia	Colombia	Lake	TR	224.472	81.9323	1	10.847	-74.499	224.472				D			NA	365		Konnerup et al., 2014	Johnson et al 2022	Konnerup, D., Betancourt-Portela, J. M., Villamil, C., & Parra, J. P. (2014). Nitrous oxide and methane emissions from the restored mangrove ecosystem of the Ciénaga Grande de Santa Marta, Colombia. Estuarine, Coastal and Shelf Science, 140, 43–51. https://doi.org/10.1016/j.ecss.2014.01.006
161	Stein, Netherlands	Netherlands	Lake	T	235.026	85.7845	1	52.018	4.797	235.026			0.28	D		Yes	NA	365	Mesotrophic drainage ditches	Schrier-Uijl et al., 2011	Johnson et al 2022	Schrier-Uijl, A. P., Veraart, A. J., Leffelaar, P. A., Berendse, F., & Veenendaal, E. M.(2011). Release of CO2 and CH4 from lakes and drainage ditches in temperate wetlands. Biogeochemistry, 102, 265–279. https://doi.org/10.1007/s10533-010-9440-7
172	Schutsloterwiede, Netherlands	Netherlands	Lake	T	443.938	162.037	1	52.667	6.15	443.938		1.41	1.2	D			NA	365	Mesotrophic to eutrophic	Schrier-Uijl et al., 2011	Johnson et al 2022	Schrier-Uijl, A. P., Veraart, A. J., Leffelaar, P. A., Berendse, F., & Veenendaal, E. M.(2011). Release of CO2 and CH4 from lakes and drainage ditches in temperate wetlands. Biogeochemistry, 102, 265–279. https://doi.org/10.1007/s10533-010-9440-7
166	Koole, Netherlands	Netherlands	Lake	T	504.87	184.278	1	52.153	4.831	504.87			0.8	D		Yes	NA	365	Mesotrophic drainage ditches	Schrier-Uijl et al., 2011	Johnson et al 2022	Schrier-Uijl, A. P., Veraart, A. J., Leffelaar, P. A., Berendse, F., & Veenendaal, E. M.(2011). Release of CO2 and CH4 from lakes and drainage ditches in temperate wetlands. Biogeochemistry, 102, 265–279. https://doi.org/10.1007/s10533-010-9440-7
171	Horstermeer, Netherlands	Netherlands	Lake	T	583.212	212.873	1	52.244	5.106	583.212			0.9	D		Yes	NA	365	Eutrophic drainage ditches	Schrier-Uijl et al., 2011	Johnson et al 2022	Schrier-Uijl, A. P., Veraart, A. J., Leffelaar, P. A., Berendse, F., & Veenendaal, E. M.(2011). Release of CO2 and CH4 from lakes and drainage ditches in temperate wetlands. Biogeochemistry, 102, 265–279. https://doi.org/10.1007/s10533-010-9440-7
162	Oukoop, Netherlands	Netherlands	Lake	T	748.601	273.239	1	52.042	4.776	748.601			0.25	D		Yes	NA	365	Eutrophic drainage ditches	Schrier-Uijl et al., 2011	Johnson et al 2022	Schrier-Uijl, A. P., Veraart, A. J., Leffelaar, P. A., Berendse, F., & Veenendaal, E. M.(2011). Release of CO2 and CH4 from lakes and drainage ditches in temperate wetlands. Biogeochemistry, 102, 265–279. https://doi.org/10.1007/s10533-010-9440-7
21	Gatun Lake, Panama	Panama	Lake	T	782.425	285.585	1	9.227	-79.868	782.425				D			NA	365		Keller et al., 1994	Johnson et al 2022	Keller M, Stallard RF (1994) Methane emission by bubbling from Gatun Lake, Panama. Journal of Geophysical Research, 99, 8307-8319.
29	Lago de Guadalupe, Mexico	Mexico	Lake	T	932.8	340.472	1	19.63	-99.265	932.8				D			NA	365		Gonzalez-Valencia et al., 2014	Johnson et al 2022	Gonzalez-Valencia R, Sepulveda-Jauregui A, Martinez-Cruz K et al. (2014) Methane emissions from Mexican freshwater bodies: correlations with water pollution. Hydrobiologia, 721, 9-22.
168	Drie berken, Netherlands	Netherlands	Lake	T	948.808	346.315	1	52.165	4.859	948.808			0.87	D		Yes	NA	365	Mesotrophic drainage ditches	Schrier-Uijl et al., 2011	Johnson et al 2022	Schrier-Uijl, A. P., Veraart, A. J., Leffelaar, P. A., Berendse, F., & Veenendaal, E. M.(2011). Release of CO2 and CH4 from lakes and drainage ditches in temperate wetlands. Biogeochemistry, 102, 265–279. https://doi.org/10.1007/s10533-010-9440-7

## Sheet: reservoir
No	Name	Country	Ecosystem_type	Methaneflux_mgCH4m2d1	Methaneflux_gch4m2yr1	Aggregrated_flux	Lat	Lon	DiffCH4_Flux	EbCH4_Flux	Pathway	Exclude	Estimated_icefree_days	Trophic_level	Reference	Source	Full ref
1	Allatoona	United States of America	Reservoir	13.84	5.0516	1	34.1333	-84.6333			T		365	Mesotrophic	Bevelhimer et al., 2016	Johnson et al., 2021	Bevelhimer, M., Stewart, A., Fortner, A., Phillips, J. & Mosher, J. CO2 is dominant greenhouse gas emitted from six hydropower reservoirs in Southeastern United States during peak summer emissions. Water 8, 15 (2016).
2	Armentera, Spain	Spain	Reservoir	0.253755	0.0926206	1	42.1687	3.0264	0.253755	0	DE		365		Gómez-Gener et al. 2015	Rosentreter et al., 2021	Gonzalez-Valencia, R. et al. Methane emissions from Mexican freshwater bodies: correlations with water pollution. Hydrobiologia 721, 9-22 (2014).
3	Arrow-Lower	Canada	Reservoir	6.6	2.409	1	59.6333	-118.15	6.6		D		185.8		Tremblay et al., 2005	Johnson et al., 2021	Tremblay, A., Therrien, J., Hamlin, B., Wichmann, E. & LeDrew, L. J. in Greenhouse gas emissions-- fluxes and processes hydroelectric reservoirs and natural environments (eds. Tremblay, A., Varfalvy, L., Roehm, C. & Garneau, M.) 209–232 (Springer, 2005)
4	Arrow-Narrows	Canada	Reservoir	52.9067	19.3109	1	49.4333	-123.25	52.9067		D		220.2		Tremblay et al., 2005	Johnson et al., 2021	Tremblay, A., Therrien, J., Hamlin, B., Wichmann, E. & LeDrew, L. J. in Greenhouse gas emissions-- fluxes and processes hydroelectric reservoirs and natural environments (eds. Tremblay, A., Varfalvy, L., Roehm, C. & Garneau, M.) 209–232 (Springer, 2005)
5	Arrow-Upper	Canada	Reservoir	23	8.395	1	50.3167	-117.9	23		D		291.2		Tremblay et al., 2005	Johnson et al., 2021	Tremblay, A., Therrien, J., Hamlin, B., Wichmann, E. & LeDrew, L. J. in Greenhouse gas emissions-- fluxes and processes hydroelectric reservoirs and natural environments (eds. Tremblay, A., Varfalvy, L., Roehm, C. & Garneau, M.) 209–232 (Springer, 2005)
6	Balbina	Brazil	Reservoir	59.8667	21.8513	3	-1.8833	-59.4667			T		365		Bastviken et al., 2011; Guérin et al., 2006; Kemenes et al., 2007	Johnson et al., 2021	Bastviken, D., Tranvik, L. J., Downing, J. A., Crill, P. M. & Enrich-Prast, A. Freshwater methane emissions offset the continental carbon sink. Science331, 50–50 (2011).; Guérin, F. et al. Methane and carbon dioxide emissions from tropical reservoirs: Significance of downstream rivers. Geophys. Res. Lett.33, 1–6 (2006); Kemenes, A., Forsberg, B. R. & Melack, J. M. CO2 emissions from a tropical hy…
7	Baoshan	Taiwan	Reservoir	4.42667	1.61573	1	24.0667	121.033			T		365		Wang et al., 2013	Johnson et al., 2021	Wang, Y.-H., Huang, H.-H., Chu, C.-P. & Chuag, Y.-J. A preliminary survey of greenhouse gas emission from three reservoirs in Taiwan. Sustain. Environ. Res.23, 215–225 (2013).
8	Baroon	Australia	Reservoir	7	2.555	3	-26.7	152.867	7		D		365		Musenze et al., 2014	Johnson et al., 2021	Musenze, R. S. et al. Assessing the spatial and temporal variability of diffusive methane and nitrous oxide emissions from subtropical freshwater reservoirs. Environ. Sci. Technol.48, 14499–14507 (2014).
9	Barra Bonita	Brazil	Reservoir	20.8933	7.62607	1	-22.5167	-48.5833	16.9467	3.94667	DE		365	Mesotrophic	dos Santos et al., 2006; Rosa et al., 2004	Johnson et al., 2021	dos Santos, M. A., Rosa, L. P., Sikar, B., Sikar, E. & dos Santos, E. O. Gross greenhouse gas fluxes from hydro-power reservoir compared to thermo-power plants. Energy Policy 34, 481–488 (2006).; Rosa, L. P., Dos Santos, M. A., Matvienko, B., dos Santos, E. O. & Sikar, E. Greenhouse gas emissions from hydroelectric reservoirs in tropical regions. Climatic Change 66, 9–21 (2004).
10	Baskatong (Mercier)	Canada	Reservoir	3.2	1.168	1	46.7167	-75.8	3.2		D		271		Tremblay et al., 2005	Johnson et al., 2021	Tremblay, A., Therrien, J., Hamlin, B., Wichmann, E. & LeDrew, L. J. in Greenhouse gas emissions-- fluxes and processes hydroelectric reservoirs and natural environments (eds. Tremblay, A., Varfalvy, L., Roehm, C. & Garneau, M.) 209–232 (Springer, 2005)
11	Bersimis	Canada	Reservoir	0.106667	0.0389333	1	49.65	-69.15	0.106667		D		213.6		Tremblay et al., 2005	Johnson et al., 2021	Tremblay, A., Therrien, J., Hamlin, B., Wichmann, E. & LeDrew, L. J. in Greenhouse gas emissions-- fluxes and processes hydroelectric reservoirs and natural environments (eds. Tremblay, A., Varfalvy, L., Roehm, C. & Garneau, M.) 209–232 (Springer, 2005)
12	Bianco	Switzerland	Reservoir	0	0	1	46.4	10.0167	0		D		233.4		Diem et al., 2012	Johnson et al., 2021	Diem, T., Koch, S., Schwarzenbach, S., Wehrli, B. & Schubert, C. J. Greenhouse gas emissions (CO2, CH4, and N2O) from several perialpine and alpine hydropower reservoirs by diffusion and loss in turbines. Aquat. Sci.74, 619–635 (2012).
13	Brisay/Caniapiscau	Canada	Reservoir	9.8	3.577	1	54.6667	-69.8667	9.8		D		142		Tremblay et al., 2005	Johnson et al., 2021	Tremblay, A., Therrien, J., Hamlin, B., Wichmann, E. & LeDrew, L. J. in Greenhouse gas emissions-- fluxes and processes hydroelectric reservoirs and natural environments (eds. Tremblay, A., Varfalvy, L., Roehm, C. & Garneau, M.) 209–232 (Springer, 2005)
14	Béznar Reservoir, Spain	Spain	Reservoir	0.259333	0.0946567	1	36.9167	-3.55			T		365		León-Palmero et al. 2020	Zheng et al., 2022	León-Palmero E, Morales-Baquero, R., Rache, Greenhouse gas fluxes from reservoirs determined by watershed lithology, morphometry, and anthropogenic pressure. Environemtnal Research Letter 15, 044012
15	Cabonga	Canada	Reservoir	10.4253	3.80525	2	47.0667	-76.1833	10.4253		D		253.2		Ouellet et al. 2012; Tremblay et al., 2005	Zheng et al., 2022; Johnson et al., 2021	Ouellet, M., Prairie, Y. T., Teodoru, C. R., & del Giorgio, P. A. (2012). The fate of reservoir CH₄ emissions in a young boreal reservoir (Eastmain-1, Canada). Journal of Geophysical Research: Biogeosciences, 117(G3); Tremblay, A., Therrien, J., Hamlin, B., Wichmann, E. & LeDrew, L. J. in Greenhouse gas emissions-- fluxes and processes hydroelectric reservoirs and natural environments (eds. Tremb…
16	Cahora Bassa	Mozambique	Reservoir	2.53333	0.924667	2	-15.5833	32.7			T		365		Teodoru et al., 2015	Johnson et al., 2021	Teodoru, C. R. et al. Dynamics of greenhouse gases (CO2, CH4; N2O) along the Zambezi River and major tributaries, and their importance in the riverine carbon budget. Biogeosciences 12, 2431–2453 (2015).
17	Caniapiscau	Canada	Reservoir	9.8	3.577	1	54.3833	-69.85	9.8		D		142		Tremblay et al., 2005	Johnson et al., 2021	Tremblay, A., Therrien, J., Hamlin, B., Wichmann, E. & LeDrew, L. J. in Greenhouse gas emissions-- fluxes and processes hydroelectric reservoirs and natural environments (eds. Tremblay, A., Varfalvy, L., Roehm, C. & Garneau, M.) 209–232 (Springer, 2005)
18	Chapéu D’Uvas Reservoir, Brazil	Brazil	Reservoir	15.4667	5.64533	3	-21.55	-43.5833	15.4667		D		365		Paranaíba et al. 2018	Zheng et al., 2022	Paranaíba JR, Barros N, Mendonça R et al. (2018) Spatially resolved measurements of CO2 and CH4 concentration and gas-exchange velocity highly influence carbon-emission estimates of reservoirs. Environmental Science & Technology, 52, 607-615.
19	Cle Elum	United States of America	Reservoir	2.40333	0.877217	2	47.2667	-121.1	1.345	1.05833	DE		317.2	Oligotrophic	Harrison et al., 2017	Johnson et al., 2021	Harrison, J. A., Deemer, B. R., Birchfield, M. K. & O’Malley, M. T. Reservoir water-level drawdowns accelerate and amplify methane emission. Environmental Science & Technology 51, 1267–1277 (2017).
20	Colomera Reservoir, Spain	Spain	Reservoir	0.366	0.13359	1	37.4	-3.71667			T		365		León-Palmero et al. 2020	Zheng et al., 2022	León-Palmero E, Morales-Baquero, R., Rache, Greenhouse gas fluxes from reservoirs determined by watershed lithology, morphometry, and anthropogenic pressure. Environemtnal Research Letter 15, 044012
21	Corumbá	Brazil	Reservoir	306.457	111.857	3	-17.9833	-48.5167	47.4067	259.05	DE		365	Eutrophic	Bergier et al., 2011; Ometto et al., 2013	Johnson et al., 2021	Bergier, I., Novo, E. M. L. M., Ramos, F. M., Mazzi, E. A. & Rasera, M. F. F. L. Carbon dioxide and methane fluxes in the littoral zone of a tropical savanna reservoir (Corumbá, Brazil). Oecologia Australis 15, 666–681 (2011).; Ometto, J. P. et al. Carbon emission as a function of energy generation in hydroelectric reservoirs in Brazilian dry tropical biome. Energy Policy 58, 109–116 (2013).
22	Cubillas Reservoir, Spain	Spain	Reservoir	0.482667	0.176173	1	37.2	-3.71667			T		365		León-Palmero et al. 2020	Zheng et al., 2022	León-Palmero E, Morales-Baquero, R., Rache, Greenhouse gas fluxes from reservoirs determined by watershed lithology, morphometry, and anthropogenic pressure. Environemtnal Research Letter 15, 044012
23	Curuá-Una	Brazil	Reservoir	22.5333	8.22467	5	-2.8	-54.2933	12.4	25.3333	DE		365		Duchemin et al., 2000; Paranaíba et al. 2018	Johnson et al., 2021; Zheng et al., 2022	Duchemin, É. et al. Comparison of greenhouse gas emissions from an old tropical reservoir with those from other reservoirs worldwide. Verhandlungen Int. Ver. Theor. Angew.27, 1391–1395 (2000).; NA
24	Day Lake	United States of America	Reservoir	7	2.555	1	46.1833	-90.9	7		D		274.2		St. Louis et al., 2000	Johnson et al., 2021	St. Louis, V. L., Kelly, C. A., Duchemin, É., Rudd, J. W. & Rosenberg, D. M. Reservoir surfaces as sources of greenhouse gases to the atmosphere: a global estimate. BioScience50, 766–775 (2000).
25	Decelles Reservoir, Québec, Canada	Canada	Reservoir	9.264	3.38136	1	47.6833	-78.1667	9.264		D		203.6		Ouellet et al. 2012	Zheng et al., 2022	Ouellet, M., Prairie, Y. T., Teodoru, C. R., & del Giorgio, P. A. (2012). The fate of reservoir CH₄ emissions in a young boreal reservoir (Eastmain-1, Canada). Journal of Geophysical Research: Biogeosciences, 117(G3)
26	Dix	Switzerland	Reservoir	0.0533333	0.0194667	1	46.0667	7.4	0.0533333		D		230.8		Diem et al., 2012	Johnson et al., 2021	Diem, T., Koch, S., Schwarzenbach, S., Wehrli, B. & Schubert, C. J. Greenhouse gas emissions (CO2, CH4, and N2O) from several perialpine and alpine hydropower reservoirs by diffusion and loss in turbines. Aquat. Sci.74, 619–635 (2012).
27	Douglas	United States of America	Reservoir	7.6	2.774	1	35.95	-83.5333			T		365	Mesotrophic	Bevelhimer et al., 2016	Johnson et al., 2021	Bevelhimer, M., Stewart, A., Fortner, A., Phillips, J. & Mosher, J. CO2 is dominant greenhouse gas emitted from six hydropower reservoirs in Southeastern United States during peak summer emissions. Water 8, 15 (2016).
28	Dworshak	United States of America	Reservoir	4.4	1.606	1	46.5667	-116.25	4.4		D		278.2		Soumis et al., 2004	Johnson et al., 2021	Soumis, N., Duchemin, É., Canuel, R. & Lucotte, M. Greenhouse gas emissions from reservoirs of the western United States. Glob. Biogeochem. Cycles18, GB3022 (2004).
29	EOL	Canada	Reservoir	3.8	1.387	1	53.45	-76.6667	3.8		D		187.2		Tremblay et al., 2005	Johnson et al., 2021	Tremblay, A., Therrien, J., Hamlin, B., Wichmann, E. & LeDrew, L. J. in Greenhouse gas emissions-- fluxes and processes hydroelectric reservoirs and natural environments (eds. Tremblay, A., Varfalvy, L., Roehm, C. & Garneau, M.) 209–232 (Springer, 2005)
30	Eagle Creek	United States of America	Reservoir	10.4933	3.83007	1	39.85	-86.3	10.4933		D		299.6		Jacinthe et al., 2012	Johnson et al., 2021	Jacinthe, P. A., Filippelli, G. M., Tedesco, L. P. & Raftis, R. Carbon storage and greenhouse gases emission from a fluvial reservoir in an agricultural landscape. Catena94, 53–63 (2012).
31	Eastmain 1	Canada	Reservoir	4.46667	1.63033	2	51.5	-74	4.25333	0.426667	DE		185	Mesotrophic	Demarty et al., 2009; Teodoru et al., 2012	Johnson et al., 2021	Demarty, M., Bastien, J., Tremblay, A., Hesslein, R. H. & Gill, R. Greenhouse gas emissions from boreal reservoirs in Manitoba and Québec, Canada, measured with automated systems. Environ. Sci. Technol.43, 8908–8915 (2009).; Teodoru, C. R. et al. The net carbon footprint of a newly created boreal hydroelectric reservoir. Global Biogeochemical Cycles 26, GB2016 (2012).
32	Eastmain-Opinica	Canada	Reservoir	8	2.92	1	52.7833	-76.6167	8		D		200.8		Kelly et al., 1994	Johnson et al., 2021	Kelly, C. A., Rudd, J. W., St Louis, V. L. & Moore, T. Turning attention to reservoir surfaces, a neglected area in greenhouse studies. Eos Trans. Am. Geophys. Union75, 332–333 (1994).
33	Ecological Station of Seridó	Brazil	Reservoir	37.3333	13.6267	1	-6.5667	-37.25	14.6667	22.6667	DE		365	Eutrophic	Almeida et al., 2016	Johnson et al., 2021	Almeida, R. M. et al. High primary production contrasts with intense carbon emission in a eutrophic tropical reservoir. Front. Microbiol.7, (2016).
34	Eguzon Reservoir, France	France	Reservoir	26.8981	9.81782	1	46.45	1.6	23.8806	3.01754	DE		365	Eutrophic	Descloux et al. 2017	Zheng et al., 2022	Descloux, S., Chanudet, V ., Serça, V ., Guérin, F.: Methane and nitrous oxide annual emissions from an old eutrophic temperature reservoir. Sci. Total Environ., 598, 959-972, 2017.
35	El Portillo Reservoir, Spain	Spain	Reservoir	0.424667	0.155003	1	37.5667	-2.86667			T		365		León-Palmero et al. 2020	Zheng et al., 2022	León-Palmero E, Morales-Baquero, R., Rache, Greenhouse gas fluxes from reservoirs determined by watershed lithology, morphometry, and anthropogenic pressure. Environemtnal Research Letter 15, 044012
36	Emigrant	United States of America	Reservoir	11.1559	4.07192	2	42.15	-122.6	4.00333	3.57333	DE		325.2	Mesotrophic	Deemer et al. 2016; Harrison et al., 2017	Rosentreter et al., 2021; Johnson et al., 2021	Deemer, B. R. et al. Greenhouse gas emissions from reservoir water surfaces: a new global synthesis. BioScience 66, 949–964 (2016).; Harrison, J. A., Deemer, B. R., Birchfield, M. K. & O’Malley, M. T. Reservoir water-level drawdowns accelerate and amplify methane emission. Environmental Science & Technology 51, 1267–1277 (2017).
37	Ertan	China	Reservoir	2.84	1.0366	2	27	102	2.88		D		365		Kelly et al., 1997; Zheng et al. 2011	Johnson et al., 2021; Zheng et al., 2022	Kelly, C. A. et al. Increases in fluxes of greenhouse gases and methyl mercury following flooding of an experimental reservoir. Environ. Sci. Technol.31, 1334–1344 (1997).; Zheng, B., Wang, S., Wang, Y., & Jiang, X. (2011). Methane and nitrous oxide emissions from Ertan hydroelectric reservoir in southwest China. Hydrobiologia, 664(1), 115–124.
38	F.D. Roosevelt	United States of America	Reservoir	3.2	1.168	1	47.9	-118.767	3.2		D		254.6		Soumis et al., 2004	Johnson et al., 2021	Soumis, N., Duchemin, É., Canuel, R. & Lucotte, M. Greenhouse gas emissions from reservoirs of the western United States. Glob. Biogeochem. Cycles18, GB3022 (2004).
39	FLUDEX Reservoir, Ontario, Canana	Canada	Reservoir	18.8857	6.89327	3	43.4667	-80.5167	5.78896	13.0967	DE		237		Matthews et al. 2005	Zheng et al., 2022	Matthews, C. J. et al. Carbon dioxide and methane production in small reservoirs flooding upland boreal forest. Ecosystems8, 267–285 (2005).
40	Fei Tsui	Taiwan	Reservoir	0.68	0.2482	1	24.8833	121.567	0.68		D		365		Itoh et al., 2015	Johnson et al., 2021	Itoh, M. et al. Effect of interannual variation in winter vertical mixing on CH 4 dynamics in a subtropical reservoir: CH 4. J. Geophys. Res. Biogeosciences120, 1246–1261 (2015).
41	Fontana	United States of America	Reservoir	5.84	2.1316	1	35.4333	-83.8			T		365	Mesotrophic	Bevelhimer et al., 2016	Johnson et al., 2021	Bevelhimer, M., Stewart, A., Fortner, A., Phillips, J. & Mosher, J. CO2 is dominant greenhouse gas emitted from six hydropower reservoirs in Southeastern United States during peak summer emissions. Water 8, 15 (2016).
42	Foster	United States of America	Reservoir	116.43	42.497	2	44.4167	-122.617	5.4	111.03	DE		316.4	Mesotrophic	Harrison et al., 2017	Johnson et al., 2021	Harrison, J. A., Deemer, B. R., Birchfield, M. K. & O’Malley, M. T. Reservoir water-level drawdowns accelerate and amplify methane emission. Environmental Science & Technology 51, 1267–1277 (2017).
43	Francisco Abellán Reservoir, Spain	Spain	Reservoir	0.293333	0.107067	1	37.3	-3.26667			T		365		León-Palmero et al. 2020	Zheng et al., 2022	León-Palmero E, Morales-Baquero, R., Rache, Greenhouse gas fluxes from reservoirs determined by watershed lithology, morphometry, and anthropogenic pressure. Environemtnal Research Letter 15, 044012
44	Funil	Brazil	Reservoir	76.8267	28.0417	1	-22.5167	-44.55	1.22667	75.6	DE		365	Eutrophic	Ometto et al., 2013	Johnson et al., 2021	Ometto, J. P. et al. Carbon emission as a function of energy generation in hydroelectric reservoirs in Brazilian dry tropical biome. Energy Policy 58, 109–116 (2013).
45	Furnas	Brazil	Reservoir	79.9138	29.1685	5	-20.6637	-46.2483	22.2713	288.212	DE		365	Oligotrophic	Ometto et al., 2013; Paranaíba et al. 2018; Rogério et al. 2013	Johnson et al., 2021; Rosentreter et al., 2021; Zheng et al., 2022	Ometto, J. P. et al. Carbon emission as a function of energy generation in hydroelectric reservoirs in Brazilian dry tropical biome. Energy Policy 58, 109–116 (2013).; NA
46	Gatun Lake	Panama	Reservoir	628.413	229.371	4	9.2333	-79.8833	12.4	625.313	DE		365	Eutrophic	Joyce and Jewell, 2003	Johnson et al., 2021	Joyce, J. & Jewell, P. W. Physical controls on methane ebullition from reservoirs and lakes. Environ. Eng. Geosci.9, 167–178 (2003).
47	Gatun Lake Rio Gigantito	Panama	Reservoir	495	180.675	2	9.2333	-79.8833		495	E	Yes	365		Keller and Stallard, 1994	Johnson et al., 2021	Keller, M. & Stallard, R. F. Methane emission by bubbling from Gatun Lake, Panama. J. Geophys. Res.99, 8307–8319 (1994).
48	Gatun Lake Shannon Cove	Panama	Reservoir	617.667	225.448	3	9.2333	-79.8833		617.667	E	Yes	365		Keller and Stallard, 1994	Johnson et al., 2021	Keller, M. & Stallard, R. F. Methane emission by bubbling from Gatun Lake, Panama. J. Geophys. Res.99, 8307–8319 (1994).
49	Gatun Lake laboratory Cove	Panama	Reservoir	450.333	164.372	3	9.2333	-79.8833		450.333	E	Yes	365		Keller and Stallard, 1994	Johnson et al., 2021	Keller, M. & Stallard, R. F. Methane emission by bubbling from Gatun Lake, Panama. J. Geophys. Res.99, 8307–8319 (1994).
50	Gold Creek	Australia	Reservoir	776	283.24	1	-27.45	152.867			T		365	Eutrophic	Sturm et al., 2014	Johnson et al., 2021	Sturm, K., Yuan, Z., Gibbes, B., Werner, U. & Grinham, A. Methane and nitrous oxide sources and emissions in a subtropical freshwater reservoir, South East Queensland, Australia. Biogeosciences11, 5245–5258 (2014).
51	Gouin	Canada	Reservoir	2.70667	0.987933	1	48.9333	-74.95	2.70667		D		192.8		Tremblay et al., 2005	Johnson et al., 2021	Tremblay, A., Therrien, J., Hamlin, B., Wichmann, E. & LeDrew, L. J. in Greenhouse gas emissions-- fluxes and processes hydroelectric reservoirs and natural environments (eds. Tremblay, A., Varfalvy, L., Roehm, C. & Garneau, M.) 209–232 (Springer, 2005)
52	Grand Rapids	Canada	Reservoir	0.573333	0.209267	1	53.15	-99.2833	0.573333		D		189.8		Demarty et al., 2009	Johnson et al., 2021	Demarty, M., Bastien, J., Tremblay, A., Hesslein, R. H. & Gill, R. Greenhouse gas emissions from boreal reservoirs in Manitoba and Québec, Canada, measured with automated systems. Environ. Sci. Technol.43, 8908–8915 (2009).
53	Great Falls	Canada	Reservoir	15.3067	5.58693	1	50.45	-90	15.3067		D		178.8		Tremblay et al., 2005	Johnson et al., 2021	Tremblay, A., Therrien, J., Hamlin, B., Wichmann, E. & LeDrew, L. J. in Greenhouse gas emissions-- fluxes and processes hydroelectric reservoirs and natural environments (eds. Tremblay, A., Varfalvy, L., Roehm, C. & Garneau, M.) 209–232 (Springer, 2005)
54	Grimsel	Switzerland	Reservoir	0.533333	0.194667	1	46.5667	8.3333	0.533333		D		232.8		Diem et al., 2012	Johnson et al., 2021	Diem, T., Koch, S., Schwarzenbach, S., Wehrli, B. & Schubert, C. J. Greenhouse gas emissions (CO2, CH4, and N2O) from several perialpine and alpine hydropower reservoirs by diffusion and loss in turbines. Aquat. Sci.74, 619–635 (2012).
55	Gruyere	Switzerland	Reservoir	0.933333	0.340667	1	46.65	7.1	0.933333		D		365		Diem et al., 2012	Johnson et al., 2021	Diem, T., Koch, S., Schwarzenbach, S., Wehrli, B. & Schubert, C. J. Greenhouse gas emissions (CO2, CH4, and N2O) from several perialpine and alpine hydropower reservoirs by diffusion and loss in turbines. Aquat. Sci.74, 619–635 (2012).
56	Guntersville	United States of America	Reservoir	5.36	1.9564	1	34.4167	-86.3833			T		365	Oligotrophic	Bevelhimer et al., 2016	Johnson et al., 2021	Bevelhimer, M., Stewart, A., Fortner, A., Phillips, J. & Mosher, J. CO2 is dominant greenhouse gas emitted from six hydropower reservoirs in Southeastern United States during peak summer emissions. Water 8, 15 (2016).
57	Hartwell	United States of America	Reservoir	22.7867	8.31713	1	34.4667	-82.8333			T		365	Eutrophic	Bevelhimer et al., 2016	Johnson et al., 2021	Bevelhimer, M., Stewart, A., Fortner, A., Phillips, J. & Mosher, J. CO2 is dominant greenhouse gas emitted from six hydropower reservoirs in Southeastern United States during peak summer emissions. Water 8, 15 (2016).
58	Ilarion Reservoir, Macedonia, Greece	Greece	Reservoir	34.55	12.6107	1	40.1	21.8			T		365		Samiotis et al. 2018	Zheng et al., 2022	Samiotis G, Pekridis G, Kaklidis N et al. (2018) Greenhouse gas emissions from two hydroelectric reservoirs in Mediterranean region. Environmental Monitoring Assessment, 190, 363
59	Itaipu	Brazil	Reservoir	8.50667	3.10493	1	-25.3833	-54.55	7.90667	0.6	DE		365		dos Santos et al., 2006	Johnson et al., 2021	dos Santos, M. A., Rosa, L. P., Sikar, B., Sikar, E. & dos Santos, E. O. Gross greenhouse gas fluxes from hydro-power reservoir compared to thermo-power plants. Energy Policy 34, 481–488 (2006).
60	Itezhi Tezhi	Zambia	Reservoir	42.6333	15.5612	4	-15.7667	26.0167			T		365		Teodoru et al., 2015	Johnson et al., 2021	Teodoru, C. R. et al. Dynamics of greenhouse gases (CO2, CH4; N2O) along the Zambezi River and major tributaries, and their importance in the riverine carbon budget. Biogeosciences 12, 2431–2453 (2015).
61	Itumbiara	Brazil	Reservoir	37.1233	13.55	2	-18.4	-49.05	16.3233	41.6	DE		365		Ometto et al., 2013; Rogério et al. 2013	Johnson et al., 2021 ; Zheng et al., 2021	Ometto, J. P. et al. Carbon emission as a function of energy generation in hydroelectric reservoirs in Brazilian dry tropical biome. Energy Policy 58, 109–116 (2013).; Rogério JP, Santos MA, Santos EO (2013) Influence of environmental variables on diffusive greenhouse gas fluxes at hydroelectric reservoirs in Brazil. Brazilian Journal of Biology, 73, 753-764
63	Iznajár Reservoir, Spain	Spain	Reservoir	0.349333	0.127507	1	37.25	-4.31667			T		365		León-Palmero et al. 2020	Zheng et al., 2022	León-Palmero E, Morales-Baquero, R., Rache, Greenhouse gas fluxes from reservoirs determined by watershed lithology, morphometry, and anthropogenic pressure. Environemtnal Research Letter 15, 044012
64	JC Boyle	United States of America	Reservoir	619.387	226.076	2	42.1333	-122.033	26.9483	592.438	DE		317.2	Eutrophic	Harrison et al., 2017	Johnson et al., 2021	Harrison, J. A., Deemer, B. R., Birchfield, M. K. & O’Malley, M. T. Reservoir water-level drawdowns accelerate and amplify methane emission. Environmental Science & Technology 51, 1267–1277 (2017).
65	Jándula Reservoir, Spain	Spain	Reservoir	0.283333	0.103417	1	38.25	-3.91667			T		365		León-Palmero et al. 2020	Zheng et al., 2022	León-Palmero E, Morales-Baquero, R., Rache, Greenhouse gas fluxes from reservoirs determined by watershed lithology, morphometry, and anthropogenic pressure. Environemtnal Research Letter 15, 044012
66	Kachess	United States of America	Reservoir	4.50167	1.64311	2	47.25	-121.2	3.72667	0.775	DE		317.2	Oligotrophic	Harrison et al., 2017	Johnson et al., 2021	Harrison, J. A., Deemer, B. R., Birchfield, M. K. & O’Malley, M. T. Reservoir water-level drawdowns accelerate and amplify methane emission. Environmental Science & Technology 51, 1267–1277 (2017).
67	Kafue Gorge	Zambia	Reservoir	34.4	12.556	1	-15.8	28.4167			T		365		Teodoru et al., 2015	Johnson et al., 2021	Teodoru, C. R. et al. Dynamics of greenhouse gases (CO2, CH4; N2O) along the Zambezi River and major tributaries, and their importance in the riverine carbon budget. Biogeosciences 12, 2431–2453 (2015).
68	Kariba	Zimbabwe	Reservoir	10.1633	3.70962	4	-17	28	0.253333	19.7333	DE		365	Oligotrophic	DelSontro et al., 2011; Teodoru et al., 2015	Johnson et al., 2021	DelSontro, T., McGinnis, D. F., Sobek, S., Ostrovsky, I. & Wehrli, B. Extreme methane emissions from a Swiss hydropower reservoir: contribution from bubbling sediments. Environmental Science & Technology44, 2419–2425 (2010).; Teodoru, C. R. et al. Dynamics of greenhouse gases (CO2, CH4; N2O) along the Zambezi River and major tributaries, and their importance in the riverine carbon budget. Biogeos…
69	Keechelus	United States of America	Reservoir	0.987488	0.360433	2	47.3417	-121.368	0.93411	0.0533777	DE		317.2	Oligotrophic	Deemer et al. 2016; Harrison et al., 2017	Rosentreter et al., 2021; Johnson et al., 2021	Deemer, B. R. et al. Greenhouse gas emissions from reservoir water surfaces: a new global synthesis. BioScience 66, 949–964 (2016).; Harrison, J. A., Deemer, B. R., Birchfield, M. K. & O’Malley, M. T. Reservoir water-level drawdowns accelerate and amplify methane emission. Environmental Science & Technology 51, 1267–1277 (2017).
70	Keno	United States of America	Reservoir	323.72	118.158	1	42.1333	-121.95	13.0667	310.653	DE		317.2	Eutrophic	Harrison et al., 2017	Johnson et al., 2021	Harrison, J. A., Deemer, B. R., Birchfield, M. K. & O’Malley, M. T. Reservoir water-level drawdowns accelerate and amplify methane emission. Environmental Science & Technology 51, 1267–1277 (2017).
71	Kettle	Canada	Reservoir	0	0	1	56.3833	-94.6333	0	0	DE		152.8		Demarty et al., 2009	Johnson et al., 2021	Demarty, M., Bastien, J., Tremblay, A., Hesslein, R. H. & Gill, R. Greenhouse gas emissions from boreal reservoirs in Manitoba and Québec, Canada, measured with automated systems. Environ. Sci. Technol.43, 8908–8915 (2009).
72	Kootenay Lake	Canada	Reservoir	23.5067	8.57993	1	49.35	-116.75	23.5067		D		275		Tremblay et al., 2005	Johnson et al., 2021	Tremblay, A., Therrien, J., Hamlin, B., Wichmann, E. & LeDrew, L. J. in Greenhouse gas emissions-- fluxes and processes hydroelectric reservoirs and natural environments (eds. Tremblay, A., Varfalvy, L., Roehm, C. & Garneau, M.) 209–232 (Springer, 2005)
73	L.C.B. de Carvalho	Brazil	Reservoir	32.1067	11.7189	4	-20.15	-47.25	31.0067	4.4	DE		365		Barros et al., 2011; Ometto et al., 2013	Johnson et al., 2021	Barros, N. et al. Carbon emission from hydroelectric reservoirs linked to reservoir age and latitude. Nat. Geosci.4, 593–596 (2011).; Ometto, J. P. et al. Carbon emission as a function of energy generation in hydroelectric reservoirs in Brazilian dry tropical biome. Energy Policy 58, 109–116 (2013).
74	La Bolera Reservoir, Spain	Spain	Reservoir	0.264	0.09636	1	36.8333	-2.43333			T		365		León-Palmero et al. 2020	Zheng et al., 2022	León-Palmero E, Morales-Baquero, R., Rache, Greenhouse gas fluxes from reservoirs determined by watershed lithology, morphometry, and anthropogenic pressure. Environemtnal Research Letter 15, 044012
75	La Grande 1	Canada	Reservoir	8.8	3.212	1	53.9	-77.9167	8.8		D		187.2		Tremblay et al., 2005	Johnson et al., 2021	Tremblay, A., Therrien, J., Hamlin, B., Wichmann, E. & LeDrew, L. J. in Greenhouse gas emissions-- fluxes and processes hydroelectric reservoirs and natural environments (eds. Tremblay, A., Varfalvy, L., Roehm, C. & Garneau, M.) 209–232 (Springer, 2005)
76	La Grande 3	Canada	Reservoir	8.10667	2.95893	1	53.7167	-75.6833	8.10667		D		187.2		Tremblay et al., 2005	Johnson et al., 2021	Tremblay, A., Therrien, J., Hamlin, B., Wichmann, E. & LeDrew, L. J. in Greenhouse gas emissions-- fluxes and processes hydroelectric reservoirs and natural environments (eds. Tremblay, A., Varfalvy, L., Roehm, C. & Garneau, M.) 209–232 (Springer, 2005)
77	La Grande 4	Canada	Reservoir	10.8	3.942	1	54.6	-73.2167	10.8		D		146.4		Tremblay et al., 2005	Johnson et al., 2021	Tremblay, A., Therrien, J., Hamlin, B., Wichmann, E. & LeDrew, L. J. in Greenhouse gas emissions-- fluxes and processes hydroelectric reservoirs and natural environments (eds. Tremblay, A., Varfalvy, L., Roehm, C. & Garneau, M.) 209–232 (Springer, 2005)
78	La Grande-2	Kazakhstan	Reservoir	6.93	2.52945	4	53.7083	76.75	7.01778		D		172.4		Demarty et al., 2009; Duchemin et al., 1995; Kelly et al., 1994; Tremblay et al., 2005	Johnson et al., 2021	Demarty, M., Bastien, J., Tremblay, A., Hesslein, R. H. & Gill, R. Greenhouse gas emissions from boreal reservoirs in Manitoba and Québec, Canada, measured with automated systems. Environ. Sci. Technol.43, 8908–8915 (2009).; Duchemin, É., Lucotte, M., Canuel, R. & Chamberland, A. Production of the greenhouse gases CH4 and CO2 by hydroelectric reservoirs of the boreal region. Glob. Biogeochem. Cyc…
79	Lac Du Bonnet	Canada	Reservoir	23.8	8.687	1	50.2667	-96.0167	23.8		D		193.2		Tremblay et al., 2005	Johnson et al., 2021	Tremblay, A., Therrien, J., Hamlin, B., Wichmann, E. & LeDrew, L. J. in Greenhouse gas emissions-- fluxes and processes hydroelectric reservoirs and natural environments (eds. Tremblay, A., Varfalvy, L., Roehm, C. & Garneau, M.) 209–232 (Springer, 2005)
80	Lacamas Lake	United States of America	Reservoir	156.535	57.1353	2	45.3667	-122.25	10.41	146.125	DE		317.2	Eutrophic	Harrison et al., 2017	Johnson et al., 2021	Harrison, J. A., Deemer, B. R., Birchfield, M. K. & O’Malley, M. T. Reservoir water-level drawdowns accelerate and amplify methane emission. Environmental Science & Technology 51, 1267–1277 (2017).
81	Laforge-1	Canada	Reservoir	22.32	8.1468	2	54.2	-72.5833	27.3067		DE		146.4		Duchemin et al., 1995; Tremblay et al., 2005	Johnson et al., 2021	Duchemin, É., Lucotte, M., Canuel, R. & Chamberland, A. Production of the greenhouse gases CH4 and CO2 by hydroelectric reservoirs of the boreal region. Glob. Biogeochem. Cycles9, 529–540 (1995).; Tremblay, A., Therrien, J., Hamlin, B., Wichmann, E. & LeDrew, L. J. in Greenhouse gas emissions-- fluxes and processes hydroelectric reservoirs and natural environments (eds. Tremblay, A., Varfalvy, L.…
82	Laforge-2	Canada	Reservoir	7.50667	2.73993	1	54.95	-70.25	7.50667		D		142		Tremblay et al., 2005	Johnson et al., 2021	Tremblay, A., Therrien, J., Hamlin, B., Wichmann, E. & LeDrew, L. J. in Greenhouse gas emissions-- fluxes and processes hydroelectric reservoirs and natural environments (eds. Tremblay, A., Varfalvy, L., Roehm, C. & Garneau, M.) 209–232 (Springer, 2005)
83	Lago Loiza	Puerto Rico	Reservoir	33.2578	12.1391	3	18.3	-66.0167		33.2578	E	Yes	365		Joyce and Jewell, 2003	Johnson et al., 2021	Joyce, J. & Jewell, P. W. Physical controls on methane ebullition from reservoirs and lakes. Environ. Eng. Geosci.9, 167–178 (2003).
84	Lago Olmeca	Mexico	Reservoir	5247.31	1915.27	1	19.1333	-96.15	5247.31		D		365		Gonzalez-Valencia et al., 2014	Johnson et al., 2021	Gonzalez-Valencia, R. et al. Methane emissions from Mexican freshwater bodies: correlations with water pollution. Hydrobiologia721, 9–22 (2014).
85	Lago Umecuaro	Mexico	Reservoir	57.8	21.097	1	19.5167	-101.233	57.8		D		365		Gonzalez-Valencia et al., 2014	Johnson et al., 2021	Gonzalez-Valencia, R. et al. Methane emissions from Mexican freshwater bodies: correlations with water pollution. Hydrobiologia721, 9–22 (2014).
86	Lago de Guadalupe	Mexico	Reservoir	932.8	340.472	1	19.6167	-99.2833	932.8		D		365		Gonzalez-Valencia et al., 2014	Johnson et al., 2021	Gonzalez-Valencia, R. et al. Methane emissions from Mexican freshwater bodies: correlations with water pollution. Hydrobiologia721, 9–22 (2014).
87	Lago el Llano	Mexico	Reservoir	114.107	41.6489	1	19.65	-99.5	114.107		D		365		Gonzalez-Valencia et al., 2014	Johnson et al., 2021	Gonzalez-Valencia, R. et al. Methane emissions from Mexican freshwater bodies: correlations with water pollution. Hydrobiologia721, 9–22 (2014).
88	Lake Dillon	United States of America	Reservoir	21.3689	7.79963	1	39.62	-106.05	21.3689	0	DE		216.2		Smith and Lewis, 1992	Rosentreter et al., 2021	Smith, L. K. & Lewis, W. M. Jr. Seasonality of methane emissions from five lakes and associated wetlands of the Colorado Rockies. Global Biogeochemical Cycles 6, 323–339 (1992).
89	Lake Klöntal (reservoir), Alps, Switzerland	Switzerland	Reservoir	1.675	0.611375	4	47.0167	8.96667	1.675		D		365		Sollberger et al. 2017	Zheng et al., 2022	Solberger S., Wehrli, B., Schubert C.J., DelSontro T., Eguster. Minor methane emissions from an Alpine hydropower reesrvoir based on monitoring of diel and seasonal variability. 10, (2017)
90	Lisdorf	Germany	Reservoir	118.347	43.1965	1	49.2833	6.75	4.64	113.707	DE		365		Maeck et al., 2013	Johnson et al., 2021	Maeck, A. et al. Sediment trapping by dams creates methane emission hot spots. Environmental Science & Technology 47, 8130–8137 (2013).
91	Little Nerang	Australia	Reservoir	97.25	35.4963	4	-28.1333	153.283	23.75	294	DE		365		Grinham et al., 2011; Musenze et al., 2014	Johnson et al., 2021	Grinham, A., Dunbabin, M., Gale, D. & Udy, J. Quantification of ebullitive and diffusive methane release to atmosphere from a water storage. Atmos. Environ.45, 7166–7173 (2011).; Musenze, R. S. et al. Assessing the spatial and temporal variability of diffusive methane and nitrous oxide emissions from subtropical freshwater reservoirs. Environ. Sci. Technol.48, 14499–14507 (2014).
92	Liyutan	Taiwan	Reservoir	2.65333	0.968467	1	24.3333	120.767			T		365		Wang et al., 2013	Johnson et al., 2021	Wang, Y.-H., Huang, H.-H., Chu, C.-P. & Chuag, Y.-J. A preliminary survey of greenhouse gas emission from three reservoirs in Taiwan. Sustain. Environ. Res.23, 215–225 (2013).
93	Lokka	Finland	Reservoir	72.4078	26.4289	22	66.9029	26.8826	22.3749	105.731	DE		154.2	Eutrophic	Bastviken et al., 2011; Huttunen et al., 2002	Johnson et al., 2021	Bastviken, D., Tranvik, L. J., Downing, J. A., Crill, P. M. & Enrich-Prast, A. Freshwater methane emissions offset the continental carbon sink. Science331, 50–50 (2011).; Huttunen, J. T. et al. Fluxes of CH4, CO2, and N2O in hydroelectric reservoirs Lokka and Porttipahta in the northern boreal zone in Finland. Global Biogeochemical Cycles 16, 1–17 (2002).
94	Los Bermejales Reservoir, Spain	Spain	Reservoir	0.286667	0.104633	1	37.35	-5.96667			T		365		León-Palmero et al. 2020	Zheng et al., 2022	León-Palmero E, Morales-Baquero, R., Rache, Greenhouse gas fluxes from reservoirs determined by watershed lithology, morphometry, and anthropogenic pressure. Environemtnal Research Letter 15, 044012
95	Lower Monumental Reservoir, Washington, USA	United States of America	Reservoir	400.421	146.154	1	46.55	-118.533	0.42125	400	DE		254.6		Miller et al. 2017	Zheng et al., 2022	Miller BL, Arntzen EV, Goldman AE et al. (2017) Methane ebullition in temperate hydropower reservoirs and implications for US policy on greenhouse gas emissions. Environmental Management, 60, 615-629
96	Lungern	Switzerland	Reservoir	0.133333	0.0486667	1	46.5667	8.9667	0.133333		D		232.8		Diem et al., 2012	Johnson et al., 2021	Diem, T., Koch, S., Schwarzenbach, S., Wehrli, B. & Schubert, C. J. Greenhouse gas emissions (CO2, CH4, and N2O) from several perialpine and alpine hydropower reservoirs by diffusion and loss in turbines. Aquat. Sci.74, 619–635 (2012).
97	Luzzone	Brazil	Reservoir	0.133333	0.0486667	1	-20.2667	-47.05	0.133333		D		365		Diem et al., 2012	Johnson et al., 2021	Diem, T., Koch, S., Schwarzenbach, S., Wehrli, B. & Schubert, C. J. Greenhouse gas emissions (CO2, CH4, and N2O) from several perialpine and alpine hydropower reservoirs by diffusion and loss in turbines. Aquat. Sci.74, 619–635 (2012).
98	Macarenhas de Moraes	Russia	Reservoir	19.2933	7.04207	1	52.9667	91.5	12.6933	6.6	DE		192.4		Ometto et al., 2013	Johnson et al., 2021	Ometto, J. P. et al. Carbon emission as a function of energy generation in hydroelectric reservoirs in Brazilian dry tropical biome. Energy Policy 58, 109–116 (2013).
99	Mainskaya	Germany	Reservoir	0.575	0.209875	2	51.1583	11.4583			T		303.8		Fedorov et al., 2015	Johnson et al., 2021	Fedorov, M. P. et al. Reservoir greenhouse gas emissions at Russian HPP. Power Technology and Engineering 49, 33–39 (2015).
100	Manic 1	Canada	Reservoir	11.3067	4.12693	1	49.7667	-68.6333	11.3067		D		201		Tremblay et al., 2005	Johnson et al., 2021	Tremblay, A., Therrien, J., Hamlin, B., Wichmann, E. & LeDrew, L. J. in Greenhouse gas emissions-- fluxes and processes hydroelectric reservoirs and natural environments (eds. Tremblay, A., Varfalvy, L., Roehm, C. & Garneau, M.) 209–232 (Springer, 2005)
101	Manic 2	Canada	Reservoir	6	2.19	1	50.2333	-68.7667	6		D		213.6		Tremblay et al., 2005	Johnson et al., 2021	Tremblay, A., Therrien, J., Hamlin, B., Wichmann, E. & LeDrew, L. J. in Greenhouse gas emissions-- fluxes and processes hydroelectric reservoirs and natural environments (eds. Tremblay, A., Varfalvy, L., Roehm, C. & Garneau, M.) 209–232 (Springer, 2005)
102	Manic 3	Canada	Reservoir	1.10667	0.403933	1	51.3333	-68.8167	1.10667		D		203.2		Tremblay et al., 2005	Johnson et al., 2021	Tremblay, A., Therrien, J., Hamlin, B., Wichmann, E. & LeDrew, L. J. in Greenhouse gas emissions-- fluxes and processes hydroelectric reservoirs and natural environments (eds. Tremblay, A., Varfalvy, L., Roehm, C. & Garneau, M.) 209–232 (Springer, 2005)
103	Manic 5	India	Reservoir	6.10667	2.22893	1	8.6333	77.4167	6.10667		D		365		Tremblay et al., 2005	Johnson et al., 2021	Tremblay, A., Therrien, J., Hamlin, B., Wichmann, E. & LeDrew, L. J. in Greenhouse gas emissions-- fluxes and processes hydroelectric reservoirs and natural environments (eds. Tremblay, A., Varfalvy, L., Roehm, C. & Garneau, M.) 209–232 (Springer, 2005)
104	Manimuthar	Brazil	Reservoir	0.64	0.2336	1	-14.8667	-55.8	0.16	0.48	DE		365		Selvam et al., 2014	Johnson et al., 2021	Selvam BP, Natchimuthu S, Arunachalam L et al. (2014) Methane and carbon dioxide emissions from inland waters in India-implications for large scale greenhouse gas balances. Global Change Biology, 20, 3397-3407
105	Manso	Brazil	Reservoir	88.8509	32.4306	5	-14.8	-54.45	45.5682	108.207	DE		365		Barros et al., 2011; Ometto et al., 2013; Sikar et al. 2005	Johnson et al., 2021; Zheng et al., 2022	Barros, N. et al. Carbon emission from hydroelectric reservoirs linked to reservoir age and latitude. Nat. Geosci.4, 593–596 (2011).; Ometto, J. P. et al. Carbon emission as a function of energy generation in hydroelectric reservoirs in Brazilian dry tropical biome. Energy Policy 58, 109–116 (2013).; NA
106	Maziarnia	Poland	Reservoir	1931.88	705.135	1	50.3167	21.9333			T		292.4		Gruca-Rokosz 2010	Johnson et al., 2021	Gruca-Rokosz, R., Tomaszek, J., Koszelnik, P. & Czerwieniec, E. Methane and carbon dioxide emission from some reservoirs in SE Poland. Limnological Review 10, 15–21 (2010).
107	McArthur Falls	Russia	Reservoir	0.0266667	0.00973333	1	50.3833	95.9833	0.0266667		D		170.4		Demarty et al., 2009	Johnson et al., 2021	Demarty, M., Bastien, J., Tremblay, A., Hesslein, R. H. & Gill, R. Greenhouse gas emissions from boreal reservoirs in Manitoba and Québec, Canada, measured with automated systems. Environ. Sci. Technol.43, 8908–8915 (2009).
108	Mettlach	Germany	Reservoir	527.24	192.443	3	49.3278	6.83333	3.68	526.013	DE		365		Maeck et al., 2013; Wilkinson et al. 2015	Johnson et al., 2021; Zheng et al., 2022	Maeck, A. et al. Sediment trapping by dams creates methane emission hot spots. Environmental Science & Technology 47, 8130–8137 (2013).; Wilkinson, J., Maeck, A., Alshboul, Z. & Lorke, A. Continuous seasonal river ebullition measurements linked to sediment methane formation. Environ. Sci. Technol.49, 13121–13129 (2015).
109	Miranda	Saudi Arabia	Reservoir	158.073	57.6968	2	18.9167	48.0333	130.347	31.8	DE		365		dos Santos et al., 2006; Rosa et al., 2004	Johnson et al., 2021	dos Santos, M. A., Rosa, L. P., Sikar, B., Sikar, E. & dos Santos, E. O. Gross greenhouse gas fluxes from hydro-power reservoir compared to thermo-power plants. Energy Policy 34, 481–488 (2006).; Rosa, L. P., Dos Santos, M. A., Matvienko, B., dos Santos, E. O. & Sikar, E. Greenhouse gas emissions from hydroelectric reservoirs in tropical regions. Climatic Change 66, 9–21 (2004).
110	Miyun	China	Reservoir	12.6	4.599	2	40.4167	117	12.6		D		176.8		Li et al., 2015; Yang et al., 2014	Johnson et al., 2021	Li, S., Zhang, Q., Bush, R. T. & Sullivan, L. A. Methane and CO2 emissions from China’s hydroelectric reservoirs: a new quantitative synthesis. Environ. Sci. Pollut. Res.22, 5325–5339 (2015).; Yang, L. et al. Progress in the studies on the greenhouse gas emissions from reservoirs. Acta Ecol. Sin.34, 204–212 (2014).
111	Moose Lake	Mongolia	Reservoir	3	1.095	1	46.0167	91.0667	3		D		224.4		St. Louis et al., 2000	Johnson et al., 2021	St. Louis, V. L., Kelly, C. A., Duchemin, É., Rudd, J. W. & Rosenberg, D. M. Reservoir surfaces as sources of greenhouse gases to the atmosphere: a global estimate. BioScience50, 766–775 (2000).
112	Nam Leuk	Laos	Reservoir	78.4	28.616	1	18.45	102.95			T		365		Chanudet et al., 2011	Johnson et al., 2021	Chanudet, V. et al. Gross CO2 and CH4 emissions from the Nam Ngum and Nam Leuk sub-tropical reservoirs in Lao PDR. Science of The Total Environment 409, 5382–5391 (2011).
113	Nam Ngum	Laos	Reservoir	4.8	1.752	1	18.5333	103.55			T		365		Chanudet et al., 2011	Johnson et al., 2021	Chanudet, V. et al. Gross CO2 and CH4 emissions from the Nam Ngum and Nam Leuk sub-tropical reservoirs in Lao PDR. Science of The Total Environment 409, 5382–5391 (2011).
114	Nam Theun 2	Laos	Reservoir	214.647	78.3462	12	17.9833	104.95	21.7992	126.002	DE		365		Deshmukh et al., 2014	Johnson et al., 2021	Deshmukh, C. et al. Physical controls on CH4 emissions from a newly flooded subtropical freshwater hydroelectric reservoir: Nam Theun 2. Biogeosciences11, 4251–4269 (2014).
115	Negratín Reservoir, Spain	Spain	Reservoir	0.1778	0.064897	1	37.5833	-2.81667			T		365		León-Palmero et al. 2020	Zheng et al., 2022	León-Palmero E, Morales-Baquero, R., Rache, Greenhouse gas fluxes from reservoirs determined by watershed lithology, morphometry, and anthropogenic pressure. Environemtnal Research Letter 15, 044012
116	Nelson Lake	Mongolia	Reservoir	6	2.19	1	46.0833	91.5	6		D		224.4		St. Louis et al., 2000	Johnson et al., 2021	St. Louis, V. L., Kelly, C. A., Duchemin, É., Rudd, J. W. & Rosenberg, D. M. Reservoir surfaces as sources of greenhouse gases to the atmosphere: a global estimate. BioScience50, 766–775 (2000).
117	New Melones	United States of America	Reservoir	7.10667	2.59393	1	37.9833	-120.517	7.10667		D		254.6		Soumis et al., 2004	Johnson et al., 2021	Soumis, N., Duchemin, É., Canuel, R. & Lucotte, M. Greenhouse gas emissions from reservoirs of the western United States. Glob. Biogeochem. Cycles18, GB3022 (2004).
118	Nielisz	Poland	Reservoir	2164	789.86	1	50.7833	23.0167			T		292.4		Gruca-Rokosz et al., 2011	Johnson et al., 2021	Gruca-Rokosz, R., Czerwieniec, E. & Tomaszek, J. A. Methane emission from the Nielisz Reservoir. Environment Protection Engineering 37, 101–109 (2011).
119	Oberaar	Switzerland	Reservoir	0.4	0.146	1	46.55	8.26667	0.4		D		232.8		Diem et al., 2012	Johnson et al., 2021	Diem, T., Koch, S., Schwarzenbach, S., Wehrli, B. & Schubert, C. J. Greenhouse gas emissions (CO2, CH4, and N2O) from several perialpine and alpine hydropower reservoirs by diffusion and loss in turbines. Aquat. Sci.74, 619–635 (2012).
120	Okhla	India	Reservoir	116	42.34	1	28.5333	77.3			T		365	Eutrophic	Bansal et al., 2015	Johnson et al., 2021	Bansal, S., Chakraborty, M., Katyal, D. & Garg, J. K. Methane flux from a subtropical reservoir located in the floodplains of river Yamuna, India. Applied Ecology and Environmental Research 13, 597–613 (2015).
121	Oroville	China	Reservoir	4.2	1.533	1	39.55	121.433	4.2		D		176.8		Soumis et al., 2004	Johnson et al., 2021	Soumis, N., Duchemin, É., Canuel, R. & Lucotte, M. Greenhouse gas emissions from reservoirs of the western United States. Glob. Biogeochem. Cycles18, GB3022 (2004).
122	Outardes 3	Kazakhstan	Reservoir	0.106667	0.0389333	1	49.95	69.35	0.106667		D		172.4		Tremblay et al., 2005	Johnson et al., 2021	Tremblay, A., Therrien, J., Hamlin, B., Wichmann, E. & LeDrew, L. J. in Greenhouse gas emissions-- fluxes and processes hydroelectric reservoirs and natural environments (eds. Tremblay, A., Varfalvy, L., Roehm, C. & Garneau, M.) 209–232 (Springer, 2005)
123	Outardes 4	Kazakhstan	Reservoir	0.906667	0.330933	1	50.2667	69.2	0.906667		D		185.8		Tremblay et al., 2005	Johnson et al., 2021	Tremblay, A., Therrien, J., Hamlin, B., Wichmann, E. & LeDrew, L. J. in Greenhouse gas emissions-- fluxes and processes hydroelectric reservoirs and natural environments (eds. Tremblay, A., Varfalvy, L., Roehm, C. & Garneau, M.) 209–232 (Springer, 2005)
124	Palar-Porunthalar	India	Reservoir	46.6	17.009	1	10.3667	77.4833	0.96	45.64	DE		365		Selvam et al., 2014	Johnson et al., 2021	Selvam, B. P., Natchimuthu, S., Arunachalam, L. & Bastviken, D. Methane and carbon dioxide emissions from inland waters in India - implications for large scale greenhouse gas balances. Glob. Change Biol.20, 3397–3407 (2014).
125	Pampulha	Saudi Arabia	Reservoir	788.453	287.785	1	19.8333	43.9667	55.3467	733.107	DE		365	Eutrophic	de Mello et al., 2018	Johnson et al., 2021	de Mello, N. A. S. T., Brighenti, L. S., Barbosa, F. A., Staehr, P. A. & Bezerra Neto, J. F. Spatial variability of methane (CH4) ebullition in a tropical hypereutrophic reservoir: silted areas as a bubble hot spot. Lake and Reservoir Management 34, 105–114 (2018).
126	Parapalar	India	Reservoir	10.72	3.9128	1	10.4167	77.6833	4.64	6.08	DE		365		Selvam et al., 2014	Johnson et al., 2021	Selvam, B. P., Natchimuthu, S., Arunachalam, L. & Bastviken, D. Methane and carbon dioxide emissions from inland waters in India - implications for large scale greenhouse gas balances. Glob. Change Biol.20, 3397–3407 (2014).
127	Petit Saut	French Guiana	Reservoir	244.531	89.254	7	5.06667	-53.05	823.92	120.6	DE		365		Abril et al., 2005; Galy-Lacaux et al. 1997; Guérin et al., 2006	Johnson et al., 2021; Zheng et al., 2022	Abril, G. et al. Carbon dioxide and methane emissions and the carbon budget of a 10-year old tropical reservoir (Petit Saut, French Guiana). Glob. Biogeochem. Cycles19, GB4007 (2005).; Galy-Lacaux, C. et al. Gaseous emissions and oxygen consumption in hydroelectric dams: A case study in French Guyana. Glob. Biogeochem. Cycles11, 471–483 (1997).; Guérin, F. et al. Methane and carbon dioxide emissi…
128	Pine Falls	Russia	Reservoir	0.106667	0.0389333	1	50.5667	96.2	0.106667		D		170.4		Tremblay et al., 2005	Johnson et al., 2021	Tremblay, A., Therrien, J., Hamlin, B., Wichmann, E. & LeDrew, L. J. in Greenhouse gas emissions-- fluxes and processes hydroelectric reservoirs and natural environments (eds. Tremblay, A., Varfalvy, L., Roehm, C. & Garneau, M.) 209–232 (Springer, 2005)
129	Polyfytos Reservoir, Macedonia, Greece	Greece	Reservoir	28.2	10.293	1	40.3	22.1			T		365		Samiotis et al. 2018	Zheng et al., 2022	Samiotis G, Pekridis G, Kaklidis N et al. (2018) Greenhouse gas emissions from two hydroelectric reservoirs in Mediterranean region. Environmental Monitoring Assessment, 190, 363
130	Porttipahta	Finland	Reservoir	3.37714	1.23266	6	68	26.75	3.24	0.7	DE		178.4	Mesotrophic	Bastviken et al., 2011; Huttunen et al., 2002	Johnson et al., 2021	Bastviken, D., Tranvik, L. J., Downing, J. A., Crill, P. M. & Enrich-Prast, A. Freshwater methane emissions offset the continental carbon sink. Science331, 50–50 (2011).; Huttunen, J. T. et al. Fluxes of CH4, CO2, and N2O in hydroelectric reservoirs Lokka and Porttipahta in the northern boreal zone in Finland. Global Biogeochemical Cycles 16, 1–17 (2002).
131	Priest Rapids Reservoir, Washington, USA	United States of America	Reservoir	400.911	146.333	1	46.55	-118.533	0.911429	400	DE		254.6		Miller et al. 2017	Zheng et al., 2022	Miller BL, Arntzen EV, Goldman AE et al. (2017) Methane ebullition in temperate hydropower reservoirs and implications for US policy on greenhouse gas emissions. Environmental Management, 60, 615-629
132	Rehlingen	Germany	Reservoir	4.88	1.7812	1	49.3667	6.68333	2.88	2	DE		365		Maeck et al., 2013	Johnson et al., 2021	Maeck, A. et al. Sediment trapping by dams creates methane emission hot spots. Environmental Science & Technology 47, 8130–8137 (2013).
133	Riviere-des-Prairies	Kazakhstan	Reservoir	0.493333	0.180067	1	45.5833	73.65	0.493333		D		206.6		Demarty et al., 2009	Johnson et al., 2021	Demarty, M., Bastien, J., Tremblay, A., Hesslein, R. H. & Gill, R. Greenhouse gas emissions from boreal reservoirs in Manitoba and Québec, Canada, measured with automated systems. Environ. Sci. Technol.43, 8908–8915 (2009).
134	Robertson	Russia	Reservoir	6.10667	2.22893	1	51	59.8833	6.10667		D		202.2		Tremblay et al., 2005	Johnson et al., 2021	Tremblay, A., Therrien, J., Hamlin, B., Wichmann, E. & LeDrew, L. J. in Greenhouse gas emissions-- fluxes and processes hydroelectric reservoirs and natural environments (eds. Tremblay, A., Varfalvy, L., Roehm, C. & Garneau, M.) 209–232 (Springer, 2005)
135	Rules Reservoir, Spain	Spain	Reservoir	0.280667	0.102443	1	36.8667	-3.46667			T		365		León-Palmero et al. 2020	Zheng et al., 2022	León-Palmero E, Morales-Baquero, R., Rache, Greenhouse gas fluxes from reservoirs determined by watershed lithology, morphometry, and anthropogenic pressure. Environemtnal Research Letter 15, 044012
136	Rzeszow	Poland	Reservoir	2292.72	836.843	1	50	21.9833			T		292.4	Eutrophic	Gruca-Rokosz 2010	Johnson et al., 2021	Gruca-Rokosz, R., Tomaszek, J., Koszelnik, P. & Czerwieniec, E. Methane and carbon dioxide emission from some reservoirs in SE Poland. Limnological Review 10, 15–21 (2010).
137	Saarbrucken	Germany	Reservoir	3.36	1.2264	1	49.2333	6.91667	3.36	0	DE		365		Maeck et al., 2013	Johnson et al., 2021	Maeck, A. et al. Sediment trapping by dams creates methane emission hot spots. Environmental Science & Technology 47, 8130–8137 (2013).
138	Sainte-Marguerite 2	Kazakhstan	Reservoir	4.10667	1.49893	1	50.5167	67.0667	4.10667		D		185.8		Tremblay et al., 2005	Johnson et al., 2021	Tremblay, A., Therrien, J., Hamlin, B., Wichmann, E. & LeDrew, L. J. in Greenhouse gas emissions-- fluxes and processes hydroelectric reservoirs and natural environments (eds. Tremblay, A., Varfalvy, L., Roehm, C. & Garneau, M.) 209–232 (Springer, 2005)
139	Sainte-Marguerite 3	Kazakhstan	Reservoir	2.70667	0.987933	1	51.6667	67.0333	2.70667		D		185.8		Tremblay et al., 2005	Johnson et al., 2021	Tremblay, A., Therrien, J., Hamlin, B., Wichmann, E. & LeDrew, L. J. in Greenhouse gas emissions-- fluxes and processes hydroelectric reservoirs and natural environments (eds. Tremblay, A., Varfalvy, L., Roehm, C. & Garneau, M.) 209–232 (Springer, 2005)
140	Samuel	Brazil	Reservoir	79.5978	29.0532	6	-8.8	-63.4167	86.56	16.4867	DE		365		dos Santos et al., 2006; Guérin et al., 2006; Lima 2005; Lima et al., 2002; Rosa et al., 2003; Rosa et al., 2004	Johnson et al., 2021	dos Santos, M. A., Rosa, L. P., Sikar, B., Sikar, E. & dos Santos, E. O. Gross greenhouse gas fluxes from hydro-power reservoir compared to thermo-power plants. Energy Policy 34, 481–488 (2006).; Guérin, F. et al. Methane and carbon dioxide emissions from tropical reservoirs: Significance of downstream rivers. Geophys. Res. Lett.33, 1–6 (2006); Lima, I. B. T. Biogeochemical distinction of methane…
141	San Clemente Reservoir, Spain	Spain	Reservoir	0.248	0.09052	1	37.5667	-2.86667			T		365		León-Palmero et al. 2020	Zheng et al., 2022	León-Palmero E, Morales-Baquero, R., Rache, Greenhouse gas fluxes from reservoirs determined by watershed lithology, morphometry, and anthropogenic pressure. Environemtnal Research Letter 15, 044012
142	Santa Maria	Switzerland	Reservoir	0.266667	0.0973333	1	46.5667	8.8	0.266667		D		232.8		Diem et al., 2012	Johnson et al., 2021	Diem, T., Koch, S., Schwarzenbach, S., Wehrli, B. & Schubert, C. J. Greenhouse gas emissions (CO2, CH4, and N2O) from several perialpine and alpine hydropower reservoirs by diffusion and loss in turbines. Aquat. Sci.74, 619–635 (2012).
143	Sayano-Shushenkaya	Russia	Reservoir	0.705897	0.257653	12	52.8167	91.3667			T		192.4		Fedorov et al., 2015	Johnson et al., 2021	Fedorov, M. P. et al. Reservoir greenhouse gas emissions at Russian HPP. Power Technology and Engineering 49, 33–39 (2015).
144	Segredo	Brazil	Reservoir	8.79333	3.20957	2	-25.7833	-52.1	7	1.8	DE		365	Mesotrophic	dos Santos et al., 2006; Rosa et al., 2004	Johnson et al., 2021	dos Santos, M. A., Rosa, L. P., Sikar, B., Sikar, E. & dos Santos, E. O. Gross greenhouse gas fluxes from hydro-power reservoir compared to thermo-power plants. Energy Policy 34, 481–488 (2006).; Rosa, L. P., Dos Santos, M. A., Matvienko, B., dos Santos, E. O. & Sikar, E. Greenhouse gas emissions from hydroelectric reservoirs in tropical regions. Climatic Change 66, 9–21 (2004).
145	Serra da Mesa	Chad	Reservoir	61.6116	22.4883	6	13.8417	16.1222	13.8033	110.327	DE		365		dos Santos et al., 2006; Marcelino et al., 2015; Ometto et al., 2013; Rogério et al. 2013; Sikar et al. 2005; St. Louis et al., 2000	Johnson et al., 2021; Zheng et al., 2022	dos Santos, M. A., Rosa, L. P., Sikar, B., Sikar, E. & dos Santos, E. O. Gross greenhouse gas fluxes from hydro-power reservoir compared to thermo-power plants. Energy Policy 34, 481–488 (2006).; Marcelino, A. et al. Diffusive emission of methane and carbon dioxide from two hydropower reservoirs in Brazil. Braz. J. Biol.75, 331–338 (2015).; Ometto, J. P. et al. Carbon emission as a function of en…
146	Serrig	Germany	Reservoir	409.298	149.394	3	49.4611	6.71111	5.76	407.378	DE		365		Maeck et al., 2013; Maeck et al., 2014; Wilkinson et al. 2015	Johnson et al., 2021; Zheng et al., 2022	Maeck, A. et al. Sediment trapping by dams creates methane emission hot spots. Environmental Science & Technology 47, 8130–8137 (2013).; Wilkinson, J., Maeck, A., Alshboul, Z. & Lorke, A. Continuous seasonal river ebullition measurements linked to sediment methane formation. Environ. Sci. Technol.49, 13121–13129 (2015).
147	Seven Mile	Russia	Reservoir	109.507	39.9699	1	55.9667	120.4	109.507		D		126.6		Tremblay et al., 2005	Johnson et al., 2021	Tremblay, A., Therrien, J., Hamlin, B., Wichmann, E. & LeDrew, L. J. in Greenhouse gas emissions-- fluxes and processes hydroelectric reservoirs and natural environments (eds. Tremblay, A., Varfalvy, L., Roehm, C. & Garneau, M.) 209–232 (Springer, 2005)
148	Shasta	China	Reservoir	9.50667	3.46993	1	40.85	122.383	9.50667		D		176.8		Soumis et al., 2004	Johnson et al., 2021	Soumis, N., Duchemin, É., Canuel, R. & Lucotte, M. Greenhouse gas emissions from reservoirs of the western United States. Glob. Biogeochem. Cycles18, GB3022 (2004).
149	Sihl	Switzerland	Reservoir	0.266667	0.0973333	1	47.1333	8.8	0.266667		D		365		Diem et al., 2012	Johnson et al., 2021	Diem, T., Koch, S., Schwarzenbach, S., Wehrli, B. & Schubert, C. J. Greenhouse gas emissions (CO2, CH4, and N2O) from several perialpine and alpine hydropower reservoirs by diffusion and loss in turbines. Aquat. Sci.74, 619–635 (2012).
150	Solina	Poland	Reservoir	0	0	1	49.3667	22.45			T		292.4		Gruca-Rokosz 2010	Johnson et al., 2021	Gruca-Rokosz, R., Tomaszek, J., Koszelnik, P. & Czerwieniec, E. Methane and carbon dioxide emission from some reservoirs in SE Poland. Limnological Review 10, 15–21 (2010).
151	Tehri	India	Reservoir	27.8933	10.1811	1	30.3667	78.4667	23.1067	4.78667	DE		97.2		Kumar and Sharma, 2016	Johnson et al., 2021	Kumar, A. & Sharma, M. P. Assessment of risk of GHG emissions from Tehri hydropower reservoir, India. Human and Ecological Risk Assessment: An International Journal 22, 71–85 (2016).
152	Thirparappu	India	Reservoir	120.107	43.8389	1	8.38333	77.25	5.92	114.187	DE		365		Selvam et al., 2014	Johnson et al., 2021	Selvam, B. P., Natchimuthu, S., Arunachalam, L. & Bastviken, D. Methane and carbon dioxide emissions from inland waters in India - implications for large scale greenhouse gas balances. Glob. Change Biol.20, 3397–3407 (2014).
153	Three Gorges	China	Reservoir	10.4411	3.81099	30	30.7818	109.091	10.3312		DE		181.8	Eutrophic	Chen et al., 2011; Hao et al. 2019; Li et al., 2015; Lu et al., 2011; Xiao et al., 2013; Yang et al., 2013; Zhao et al., 2013; Zhen et al., 2012	Johnson et al., 2021; Zheng et al., 2022	Chen, H. et al. Nitrous oxide emissions from newly created littoral marshes in the drawdown area of the Three Gorges Reservoir, China. Water. Air. Soil Pollut.211, 25–33 (2010).; Hao, Y., Bai, L., Liu, Y., Zhang, J., Wang, J., Wang, Y., & Wang, H. (2019). Spatiotemporal variations of methane emissions from the Three Gorges Reservoir, China. Science of the Total Environment, 659, 395–407.; Li, S.,…
154	Tigercat Lake	Mongolia	Reservoir	1	0.365	1	46.0167	91.2333	1		D		224.4		St. Louis et al., 2000	Johnson et al., 2021	St. Louis, V. L., Kelly, C. A., Duchemin, É., Rudd, J. W. & Rosenberg, D. M. Reservoir surfaces as sources of greenhouse gases to the atmosphere: a global estimate. BioScience50, 766–775 (2000).
155	Toulnoustouc	Kazakhstan	Reservoir	0.106667	0.0389333	1	50.1	68.3833	0.106667		D		185.8		Tremblay et al., 2005	Johnson et al., 2021	Tremblay, A., Therrien, J., Hamlin, B., Wichmann, E. & LeDrew, L. J. in Greenhouse gas emissions-- fluxes and processes hydroelectric reservoirs and natural environments (eds. Tremblay, A., Varfalvy, L., Roehm, C. & Garneau, M.) 209–232 (Springer, 2005)
156	Três Marias	Saudi Arabia	Reservoir	133.356	48.6748	3	18.2333	45.25	19.64	164.507	DE		365		dos Santos et al., 2006; Marcelino et al., 2015; Rosa et al., 2004	Johnson et al., 2021	dos Santos, M. A., Rosa, L. P., Sikar, B., Sikar, E. & dos Santos, E. O. Gross greenhouse gas fluxes from hydro-power reservoir compared to thermo-power plants. Energy Policy 34, 481–488 (2006).; Marcelino, A. et al. Diffusive emission of methane and carbon dioxide from two hydropower reservoirs in Brazil. Braz. J. Biol.75, 331–338 (2015).; Rosa, L. P., Dos Santos, M. A., Matvienko, B., dos Santo…
157	Tsengwen	Taiwan	Reservoir	5.94667	2.17053	1	23.2667	120.55			T		365		Wang et al., 2013	Johnson et al., 2021	Wang, Y.-H., Huang, H.-H., Chu, C.-P. & Chuag, Y.-J. A preliminary survey of greenhouse gas emission from three reservoirs in Taiwan. Sustain. Environ. Res.23, 215–225 (2013).
158	Tucurui	Brazil	Reservoir	73.1844	26.7123	6	-3.91667	-49.6	69.6578	27.8533	DE		365		dos Santos et al., 2006; Lima 2005; Lima et al., 1998; Lima et al., 2002; Rosa et al., 2003; Rosa et al., 2004	Johnson et al., 2021	dos Santos, M. A., Rosa, L. P., Sikar, B., Sikar, E. & dos Santos, E. O. Gross greenhouse gas fluxes from hydro-power reservoir compared to thermo-power plants. Energy Policy 34, 481–488 (2006).; Lima, I. B. T. Biogeochemical distinction of methane releases from two Amazon hydroreservoirs. Chemosphere59, 1697–1702 (2005).; Lima, I. B. T., de Moraes Novo, E. M. L., Ballester, M. V. R. & Ometto, J.…
159	Vettaru	India	Reservoir	54.92	20.0458	1	10.8167	79.05	5.6	49.32	DE		365		Selvam et al., 2014	Johnson et al., 2021	Selvam, B. P., Natchimuthu, S., Arunachalam, L. & Bastviken, D. Methane and carbon dioxide emissions from inland waters in India - implications for large scale greenhouse gas balances. Glob. Change Biol.20, 3397–3407 (2014).
160	Volta Grande	Saudi Arabia	Reservoir	4.38667	1.60113	1	20.1667	47.5833	4.38667		D		365		Andrade 2014	Johnson et al., 2021	Andrade, G. de S. D. Greenhouse gas emission (GHG) and atmospheric impacts accrue from hydroelectricity production: Case study of Volta Grande hydropower plant. (Unviersidade Feeral de Minas Gerais PhD Thesis, 2014).
161	Wallula	China	Reservoir	9	3.285	1	45.9167	119.167	9		D		172.8		Soumis et al., 2004	Johnson et al., 2021	Soumis, N., Duchemin, É., Canuel, R. & Lucotte, M. Greenhouse gas emissions from reservoirs of the western United States. Glob. Biogeochem. Cycles18, GB3022 (2004).
162	Waneta	China	Reservoir	38.8	14.162	1	49.0833	117.617	38.8		D		172.8		Tremblay et al., 2005	Johnson et al., 2021	Tremblay, A., Therrien, J., Hamlin, B., Wichmann, E. & LeDrew, L. J. in Greenhouse gas emissions-- fluxes and processes hydroelectric reservoirs and natural environments (eds. Tremblay, A., Varfalvy, L., Roehm, C. & Garneau, M.) 209–232 (Springer, 2005)
163	Watts Bar	China	Reservoir	6.57333	2.39927	1	35.6167	84.7667			T		97.2	Mesotrophic	Bevelhimer et al., 2016	Johnson et al., 2021	Bevelhimer, M., Stewart, A., Fortner, A., Phillips, J. & Mosher, J. CO2 is dominant greenhouse gas emitted from six hydropower reservoirs in Southeastern United States during peak summer emissions. Water 8, 15 (2016).
164	Whatshan	Mongolia	Reservoir	5.8	2.117	1	49.0833	116.1	5.8		D		172.8		Tremblay et al., 2005	Johnson et al., 2021	Tremblay, A., Therrien, J., Hamlin, B., Wichmann, E. & LeDrew, L. J. in Greenhouse gas emissions-- fluxes and processes hydroelectric reservoirs and natural environments (eds. Tremblay, A., Varfalvy, L., Roehm, C. & Garneau, M.) 209–232 (Springer, 2005)
165	Wilcza Wola	Poland	Reservoir	242.133	88.3787	1	50.35	21.9			T		292.4		Gruca-Rokosz 2010	Johnson et al., 2021	Gruca-Rokosz, R., Tomaszek, J., Koszelnik, P. & Czerwieniec, E. Methane and carbon dioxide emission from some reservoirs in SE Poland. Limnological Review 10, 15–21 (2010).
166	William H. Harsha Lake	China	Reservoir	234.667	85.6533	1	31.0167	84.1333			T		97.2	Eutrophic	Beaulieu et al., 2014	Johnson et al., 2021	Beaulieu, J. J. et al. Denitrification alternates between a source and sink of nitrous oxide in the hypolimnion of a thermally stratified reservoir. Limnol. Oceanogr.59, 495–506 (2014).
167	Wivenhoe	Australia	Reservoir	3.8	1.387	1	-27.3833	152.6	3.8		D		365		Musenze et al., 2014	Johnson et al., 2021	Musenze, R. S. et al. Assessing the spatial and temporal variability of diffusive methane and nitrous oxide emissions from subtropical freshwater reservoirs. Environ. Sci. Technol.48, 14499–14507 (2014).
168	Wohlen	Switzerland	Reservoir	260.095	94.9347	3	46.9667	7.28333	8.56667	330	DE		230.8	Mesotrophic	DelSontro et al., 2010; Diem et al., 2012; Eugster et al. 2011	Johnson et al., 2021; Zheng et al., 2022	DelSontro, T., McGinnis, D. F., Sobek, S., Ostrovsky, I. & Wehrli, B. Extreme methane emissions from a Swiss hydropower reservoir: contribution from bubbling sediments. Environ. Sci. Technol.44, 2419–2425 (2010).; Diem, T., Koch, S., Schwarzenbach, S., Wehrli, B. & Schubert, C. J. Greenhouse gas emissions (CO2, CH4, and N2O) from several perialpine and alpine hydropower reservoirs by diffusion an…
169	Xingó	Ethiopia	Reservoir	40.0733	14.6268	2	9.61667	37.7833	29.3067	10.7467	DE		365		dos Santos et al., 2006; Rosa et al., 2004	Johnson et al., 2021	dos Santos, M. A., Rosa, L. P., Sikar, B., Sikar, E. & dos Santos, E. O. Gross greenhouse gas fluxes from hydro-power reservoir compared to thermo-power plants. Energy Policy 34, 481–488 (2006).; Rosa, L. P., Dos Santos, M. A., Matvienko, B., dos Santos, E. O. & Sikar, E. Greenhouse gas emissions from hydroelectric reservoirs in tropical regions. Climatic Change 66, 9–21 (2004).
170	Zeuzier	Switzerland	Reservoir	0.133333	0.0486667	1	46.35	7.43333	0.133333		D		365		Diem et al., 2012	Johnson et al., 2021	Diem, T., Koch, S., Schwarzenbach, S., Wehrli, B. & Schubert, C. J. Greenhouse gas emissions (CO2, CH4, and N2O) from several perialpine and alpine hydropower reservoirs by diffusion and loss in turbines. Aquat. Sci.74, 619–635 (2012).
171	Římov Reservoir, Czechia	Czechia	Reservoir	146.8	53.582	2	48.8333	14.4833		146.8	E	Yes	302.6		Tušer et al. 2017	Zheng et al., 2022	Tušer M, Picek T, Sajdlová Z et al. (2017) Seasonal and spatial dynamics of gas ebullition in a temperate water-storage reservoir. Water Resources Research, 53, 8266-8276.

## Sheet: inland wetland
No	Name	Country	Ecosystem_type	Site_name	Class_BAWLD	Ecosystem_BAWLD	WetlandClass_treat	Combined_class	Methaneflux_mgCH4m2d1	Methaneflux_gch4m2yr1	Aggregrated_flux	Nongrowingseason_flux	Lat	Lon	Growingseason_length	Estimated_flux_measure	Growingseason_method	Reference	Source	full_ref
110	EightUpTundra	United States of America	Inland wetland	Eight Mile Lake, Alaska, USA	UpTundra	Tundra	NA	UpTundra	-3.9	-0.343586	1		63.88	-149.226	90	Reported daily average of growing season	Estimated	Natali et al. 2015	Kuhn et al., 2021	https://doi.org/10.1002/2014JG002872
419	WAD-PA	United States of America	Inland wetland	Wasson Creek Upper Pasture				Non-tidal dry pasture	-3.8137	-1.392	1		43.2718	-124.324		Annual flux was estimated from Arias-Oritz et al., 2024		Williams et al., 2024	Arias-Oritz et al., 2024	Janousek, Christopher; Williams, Trevor; McKeon, Maggie; Bridgham, Scott D.; Cornu, Craig; Diefenderfer, Heida; et al. (2025). Dataset: Fluxes of carbon dioxide, methane, and nitrous oxide and associated environmental data from estuarine wetlands in the Pacific Northwest, USA. Smithsonian Environmental Research Center. Dataset. https://doi.org/10.25573/serc.27161883
420	WAW-PA	United States of America	Inland wetland	Wasson Creek Lower Pasture				Semi-tidal dry pasture	-3.37534	-1.232	1		43.2707	-124.322		Annual flux was estimated from Arias-Oritz et al., 2024		Williams et al., 2024	Arias-Oritz et al., 2024	Janousek, Christopher; Williams, Trevor; McKeon, Maggie; Bridgham, Scott D.; Cornu, Craig; Diefenderfer, Heida; et al. (2025). Dataset: Fluxes of carbon dioxide, methane, and nitrous oxide and associated environmental data from estuarine wetlands in the Pacific Northwest, USA. Smithsonian Environmental Research Center. Dataset. https://doi.org/10.25573/serc.27161883
311	ScheffervilleUpTundra	Canada	Inland wetland	Schefferville, Quebec, Canada	UpTundra	Subarctic Tundra	NA	UpTundra	-3.3	1.13227	1		54.72	-66.7	150	Reported daily average of growing season	Estimated	Adamsen and King, 1993	Kuhn et al., 2021	https://doi.org/10.1128/aem.59.2.485-490.1993�
346	TarkoUpTundra	Russia	Inland wetland	Tarko-Sale, Tuymen Oblast, Russia	UpTundra	Dry soils	NA	UpTundra	-2.9	2.2671	1		64.83	77.5833	140	Reported daily average of growing season	Estimated	Gal'chenko et al. 2001	Kuhn et al., 2021	https://doi.org/10.1023/A:1010477413264
107	DiskoUpTundra	Greenland	Inland wetland	Disko Island, West Greenland	UpTundra	Tundra; Arctic Tundra	NA	UpTundra	-2.23333	-0.120686	3		69.27	-53.4667	90	Reported annual and avergae of growing season	Estimated	D'Imperio et al. 2017; St Pierre et al. 2019	Kuhn et al., 2021	https://doi.org/10.1111/gcb.13400; https://doi.org/10.1016/j.soilbio.2019.107605
176	KolaPermBog	Russia	Inland wetland	Kola Peninsula, Murmans Oblast, Russia	PermBog	Mesic Tundra	NA	PermBog	-1.4	-0.009236	1		67.05	40.0667	90	Reported daily average of growing season	Reported	Christensen et al. 1999	Kuhn et al., 2021	http://www.jstor.org/stable/4314888
179	KolguyevUpTundra	Russia	Inland wetland	Kolguyev Island, Archangelsk Oblast, Russia	UpTundra	Mesic Tundra	NA	UpTundra	-1	0.178	1		69.15	49.35	0	Reported daily average of growing season	Reported	Christensen et al. 1999	Kuhn et al., 2021	http://www.jstor.org/stable/4314888
160	InnokoPermBog	United States of America	Inland wetland	Innoko Flats, Alaska	PermBog	Peatland	NA	PermBog	-0.97	0.0482722	1		63.58	-157.72	90	Reported daily average of growing season	Estimated	Johnston et al. 2014	Kuhn et al., 2021	https://doi.org/10.1088/1748-9326/9/10/109601
251	NaarsarsuaqUpTundra	Greenland	Inland wetland	Naarsarsuaq, South Greenland	UpTundra	Arctic Tundra	NA	UpTundra	-0.75	2.58847	1		61.18	-145.383	120	Reported annual and avergae of growing season	Estimated	St Pierre et al. 2019	Kuhn et al., 2021	https://doi.org/10.1016/j.soilbio.2019.107605
243	MoosoneePermBog	Canada	Inland wetland	Moosonee, Ontario, Canada	PermBog	Fen	NA	PermBog	-0.7	1.55809	1		51.33	-81.8333	130	Reported daily average of growing season	Estimated	Klinger et al. 1994	Kuhn et al., 2021	https://doi.org/10.1029/93JD00261
62	CherskyMarsh	Russia	Inland wetland	Chersky	NA	Tundra	Marsh	Marsh	-0.6	2.62463	1	2.67863	68.0833	161.067	90	Estimated	NA	Nakano et al. 2000	Treat et al., 2018	Nakano, T., S. Kuniyoshi, and M. Fukuda (2000), Temporal variation in methane emission from tundra wetlands in a permafrost area, northeastern Siberia, Atmospheric Environment, 34(8), 1205-1213, doi:10.1016/S1352-2310(99)00373-8.
63	CherskyPermBog	Russia	Inland wetland	Chersky, Sakha Republic, Russia	PermBog	Tundra-Taiga transition	NA	PermBog	-0.6	19.8667	1		68.83	161.667	90	Reported daily average of growing season	Estimated	Nakano et al. 2000	Kuhn et al., 2021	https://doi.org/10.1016/S1352-2310(99)00373-8
343	TadhamFen	United Kingdom	Inland wetland	Tadham	NA	Fen	Fen	Fen	-0.553	-0.20183	1		51.16	-2.81		Measured	NA	Levy et al. 2012	Treat et al., 2018	Levy, P. E., et al. (2012). "Methane emissions from soils: synthesis and analysis of a large UK data set." Global Change Biology 18(5): 1657-1669.
360	ToolikUpTundraNA	United States of America	Inland wetland	Toolik	UpTundra	Barrens	NA	UpTundra	-0.45	0.117817	1		69.47	-147.82	90	Reported annual and avergae of growing season	Estimated	Reeburgh et al. 1998	Kuhn et al., 2021	Reeburgh, W.S., King, J.Y., Regli, S.K., Kling, G.W., Auerbach, N.A., Walker, D.A. (1998). A Ch4 emission estimate for the Kaparuk River basin, Alaska. (1998). JGR Atmosphere, 103(D22), 29005-29013
6	AbiskoUpTundra	Sweden	Inland wetland	Abisko, Sweden	UpTundra	Subarctic Tundra	NA	UpTundra	-0.35	0.131191	1		68.35	18.8261	90	Reported annual and avergae of growing season	Estimated	Pedersen et al. 2017	Kuhn et al., 2021	https://doi.org/10.1002/2017JG003782
111	EllesmereUpTundra	Canada	Inland wetland	Ellesmere Island, Nunavut, Canada	UpTundra	Tundra	NA	UpTundra	-0.35	0.151995	1		78.88	-75.7667	50	Reported daily average of growing season	Reported	Lamb et al. 2011	Kuhn et al., 2021	https://doi.org/10.1111/j.1365-2486.2011.02431.x
270	Noyabr'skPermBog	Russia	Inland wetland	Noyabr'sk Pyaku-Pur, Tuymen Oblast, Russia; Noyabr'sk, Tuymen Oblast, Russia	PermBog	North Taiga	NA	PermBog	-0.25	2.65712	2		63.3	74.7	90	Reported daily average of growing season	Estimated	Sabrekov et al. 2012	Kuhn et al., 2021	https://doi.org/10.3103/S0147687412010061
20	AxelUpTundra	Canada	Inland wetland	Axel Heiberg island, Canada	UpTundra	Upland Tundra/rock; Upland Tundra	NA	UpTundra	-0.222	0.161505	5		79.42	-90.7628	50	Reported daily average of growing season	Estimated	Lau et al. 2015	Kuhn et al., 2021	https://doi.org/10.1038/ismej.2015.13
398	ZackenbergUpTundra	Greenland	Inland wetland	Zackenberg, Greenland	UpTundra	Cassiope Heath; Salix snowbed	NA	UpTundra	-0.15	0.157939	2		74.5	-21	90	Reported daily average of growing season	Estimated	Christensen et al. 2000	Kuhn et al., 2021	https://doi.org/10.1029/1999GB001134
253	NelegerPermBog	Russia	Inland wetland	Neleger, Sakha Repblic, Russia	PermBog	Alas feature	NA	PermBog	-0.1	2.67186	1		62.32	129.5	80	Reported daily average of growing season	Estimated	Takakai et al. 2008	Kuhn et al., 2021	https://doi.org/10.1029/2007JG000522
261	NortheastUpTundra	Russia	Inland wetland	Northeast Kolyma Delta, Sakha Republic, Russia	UpTundra	Mesic Tundra	NA	UpTundra	-0.1	0.164626	1		69.35	163.583	90	Reported daily average of growing season	Reported	Christensen et al. 1999	Kuhn et al., 2021	http://www.jstor.org/stable/4314888
59	ChelyuskinPermBog	Russia	Inland wetland	Chelyuskin Peninsula, Krasnoyarsk Krai, Russia	PermBog	Mesic Tundra; Wet tundra	NA	PermBog	-0.05	0.174285	2		77.03	102.517	50	Reported daily average of growing season	Reported	Christensen et al. 1999	Kuhn et al., 2021	http://www.jstor.org/stable/4314888
157	IndianaMarsh	United States of America	Inland wetland	Indiana, USA	NA	Freshwater marsh	NA	Marsh	-0.0213483	-0.00522865	1		40.964	-87.4982		Reported daily and annual flux	NA	Richards et al., 2015	Shuster et al., 2024	Richards, B. and C.B. Craft, Greenhouse gas fluxes from restored agricultural wetlands and natural wetlands, Northwestern Indiana, in The role of natural and constructed wetlands in nutrient cycling and retention on the landscape. 2015, Springer. p. 17-32.
353	ThompsonPermBog	Canada	Inland wetland	Thompson, Manitoba	PermBog	Boreal Wetlands	NA	PermBog	-0.01	15.3915	5		55.91	-98.42	120	Reported daily average of growing season	Estimated	Moosavi & Crill, 1997	Kuhn et al., 2021	https://doi.org/10.1029/96JD03873
52	BottemyraPermBog	Norway	Inland wetland	Bottemyra Wetland, Northern Norway	PermBog	Tundra	NA	PermBog	0	0.178	1		69.68	29.1992	90	Reported daily average of growing season	Estimated	Leibner et al. 2015	Kuhn et al., 2021	https://doi.org/10.3389/fmicb.2015.00356
100	DaringPermBog	Canada	Inland wetland	Daring Lake, NWT, Canada	PermBog	Tundra	NA	PermBog	0	0.178	1		64.97	-111.567	150	Reported daily average of growing season	Estimated	Riley 2018	Kuhn et al., 2021	https://curve.carleton.ca/14ff7715-0408-4de1-9d85-2365407e3fad
276	OlenekskiyPermBog	Russia	Inland wetland	Olenekskiy Bay, Sakha Republic, Russia	PermBog	Mesic Tundra	NA	PermBog	0	0.178	1		73.28	116.933	90	Reported daily average of growing season	Reported	Christensen et al. 1999	Kuhn et al., 2021	http://www.jstor.org/stable/4314888
282	PatuanakPermBog	Canada	Inland wetland	Patuanak, Saskatchewan, Can	PermBog	Frost mound	NA	PermBog	0	1.654	1		55.85	-107.683	120	Reported daily average of growing season	Estimated	Turetsky et al. 2002	Kuhn et al., 2021	https://doi.org/10.1016/S0038-0717(02)00022-6
383	WrangelUpTundra	Russia	Inland wetland	Wrangel Island, Chukotka Okrug, Russia	UpTundra	Wet tundra	NA	UpTundra	0	0.178	1		70.95	179.55	90	Reported daily average of growing season	Reported	Christensen et al. 1999	Kuhn et al., 2021	http://www.jstor.org/stable/4314888
281	PatuanakBog	Canada	Inland wetland	Patuanak, Saskatchewan, Can	Bog	Internal lawn; Continental bog	NA	Bog	0.0025	1.65432	2		55.85	-107.683	120	Reported daily average of growing season	Estimated	Turetsky et al. 2002	Kuhn et al., 2021	https://doi.org/10.1016/S0038-0717(02)00022-6
317	Seida IIBog	Russia	Inland wetland	Seida II	NA	Peat Plateau	Bog	Bog	0.0875	13.3175	4	4.4775	67.05	62.9167	86.5	Estimated	NA	Voigt et al. 2016	Treat et al., 2018	Voigt, C., Lamprecht, R. E., Marushchak, M. E., Lind, S. E., Novakovskiy, Alexander, Aurela, M., Martikainen, P. J., Biasi, C. (2016): Warming of subarctic tundra increases emissions of all three important greenhouse gases – carbon dioxide, methane, and nitrous oxide. Global Change Biology, doi: 10.1111/gcb.13563.
185	KotelnyUpTundra	Russia	Inland wetland	Kotelny Island, Sakha Republic, Russia	UpTundra	Mesic Tundra; Wet tundra	NA	UpTundra	0.1	0.18543	2		75.07	140.183	50	Reported daily average of growing season	Reported	Christensen et al. 1999	Kuhn et al., 2021	http://www.jstor.org/stable/4314888
255	NelegerUpTundra	Russia	Inland wetland	Neleger, Sakha Repblic, Russia	UpTundra	Alas feature	NA	UpTundra	0.1	2.68915	1		62	130	90	Reported daily average of growing season	Estimated	Desyatkin et al. 2009	Kuhn et al., 2021	https://doi.org/10.1111/j.1747-0765.2009.00389.x
202	LakeHazen WetlandFen	Canada	Inland wetland	LakeHazen Wetland	NA	PermafrostFen	Fen	Fen	0.18	0.202057	3	0.185857	81.8	-71.4	90	Estimated	NA	Emmerton et al 2014	Treat et al., 2018	Emmerton, C. A., V. L. St. Louis, I. Lehnherr, E. R. Humphreys, E. Rydz, and H. R. Kosolofski (2014), The net exchange of methane with high Arctic landscapes during the summer growing season, Biogeosciences, 11, 3095-3106, doi:10.5194/bg-11-3095-2014.
260	Northeast-	Russia	Inland wetland	Northeast Taymyr Peninsula, Krasnoyarsk Krai, Russia	UpTundra	Wet tundra	NA	UpTundra	0.2	0.19286	1		76.47	111.217	50	Reported daily average of growing season	Reported	Christensen et al. 1999	Kuhn et al., 2021	http://www.jstor.org/stable/4314888
290	RouseBog	Canada	Inland wetland	Rouse	NA	Peat Plateau	Bog	Bog	0.2	2.69277	2	2.67977	58.75	-94.15	130	Estimated	NA	Rouse et al. 1995	Treat et al., 2018	Rouse, W. R., S. Holland, and T. R. Moore (1995), Variability in Methane Emissions from Wetlands at Northern Treeline near Churchill, Manitoba, Canada, Arctic and Alpine Research, 27(2), 146-156.
354	TiksiBog	Russia	Inland wetland	Tiksi	NA	Palsa	Bog	Bog	0.3	0.218109	1	0.191109	71.0833	130	90	Estimated	NA	Nakano et al. 2000	Treat et al., 2018	Nakano, T., S. Kuniyoshi, and M. Fukuda (2000), Temporal variation in methane emission from tundra wetlands in a permafrost area, northeastern Siberia, Atmospheric Environment, 34(8), 1205-1213, doi:10.1016/S1352-2310(99)00373-8.
280	Palangkaraya undrained forestSwamp	Indonesia	Inland wetland	ID-Pag, Indonesia	NA	Swamp	NA	Swamp	0.329589	0.1203	1		-2.32	113.9		Reporeted annual flux	NA	Sakabe et al., 2020	Delwich et al., 2021	https://doi.org/10.18140/FLX/1669643
414	JRD-PA	United States of America	Inland wetland	Johns River North Pasture				Non-tidal dry pasture	0.394521	0.144	1		46.8987	-123.988		Annual flux was estimated from Arias-Oritz et al., 2024		Williams et al., 2024	Arias-Oritz et al., 2024	Janousek, Christopher; Williams, Trevor; McKeon, Maggie; Bridgham, Scott D.; Cornu, Craig; Diefenderfer, Heida; et al. (2025). Dataset: Fluxes of carbon dioxide, methane, and nitrous oxide and associated environmental data from estuarine wetlands in the Pacific Northwest, USA. Smithsonian Environmental Research Center. Dataset. https://doi.org/10.25573/serc.27161883
315	Seida IBog	Russia	Inland wetland	Seida I	NA	Peat Plateau	Bog	Bog	0.471667	0.296239	6	0.252905	67.0558	62.9458	79.5	Estimated; Measured	NA	Maruschak et al. 2016	Treat et al., 2018	Marushchak, M. E., et al. (2016), Methane dynamics in the subarctic tundra: combining stable isotope analyses, plot- and ecosystem-scale flux measurements, Biogeosciences, 13(2), 597-608, doi:10.5194/bg-13-597-2016.
356	Toolik-	United States of America	Inland wetland	Toolik Lake, Alaska, US	-	Upland Tundra	NA	-	0.6	0.258244	1		68.63	-149.633	90	Reported annual and avergae of growing season	Estimated	Christensen, 1993	Kuhn et al., 2021	https://doi.org/10.1007/BF00000874
115	FaddeyevskyUpTundra	Russia	Inland wetland	Faddeyevsky Island, Sakha Republic, Russia	UpTundra	Mesic Tundra	NA	UpTundra	0.7	0.23001	1		75.5	143.25	50	Reported daily average of growing season	Estimated	Christensen et al. 1999	Kuhn et al., 2021	http://www.jstor.org/stable/4314888
416	PBD-PA	United States of America	Inland wetland	Padilla Bay Dry Pasture				Non-tidal dry pasture	0.789041	0.288	1		48.4637	-122.47		Annual flux was estimated from Arias-Oritz et al., 2024		Williams et al., 2024	Arias-Oritz et al., 2024	Janousek, Christopher; Williams, Trevor; McKeon, Maggie; Bridgham, Scott D.; Cornu, Craig; Diefenderfer, Heida; et al. (2025). Dataset: Fluxes of carbon dioxide, methane, and nitrous oxide and associated environmental data from estuarine wetlands in the Pacific Northwest, USA. Smithsonian Environmental Research Center. Dataset. https://doi.org/10.25573/serc.27161883
203	LakkasuoControl	Finland	Inland wetland	Lakkasuo peatland	Bog	Oligotrophic bog	NA	Bog	0.897038	2.78947	4		61.78	24.3	120	Reported daily average of growing season	Estimated	Riutta et al. 2020	Kuhn et al., 2021	https://doi.org/10.5194/bg-17-727-2020
55	Bylot IslandNA	Canada	Inland wetland	Bylot Island	NA	Tundra / polygons	NA	NA	0.96	0.3064	1	0.22	73.15	-79.9667	90	Estimated	NA	Negandhi et al., 2013	Treat et al., 2018	Negandhi, K., I. Laurion, M. J. Whiticar, P. E. Galand, X. Xu, and C. Lovejoy (2013), Small Thaw Ponds: An Unaccounted Source of Methane in the Canadian High Arctic, PLoS ONE, 8(11), e78204.
272	OBSFen	Canada	Inland wetland	OBS	NA	Fen	Fen	Fen	1.49	2.84525	2	2.68231	55.91	-98.42	112.5	Estimated	NA	Moosavi & Crill 1997	Treat et al., 2018	Moosavi, S. C. and P. M. Crill (1997). "Controls on CH4 and CO2 emissions along two moisture gradients in the Canadian boreal zone." Journal of Geophysical Research-Atmospheres 102(D24): 29261-29277.
169	KevoPermBog	Finland	Inland wetland	Kevo, Finland	PermBog	Palsa	NA	PermBog	1.665	0.400677	2		69.82	27.1667	90	Reported annual and avergae of growing season	Estimated	Nykanen et al. 2003	Kuhn et al., 2021	https://doi.org/10.1029/2002GB001861
366	University of Alaska, FairbanksBog	United States of America	Inland wetland	US-Uaf, USA	NA	Bog	NA	Bog	1.94091	0.708433	1		64.866	-147.856		Reporeted annual flux	NA	Iwata et al., 2020	Delwich et al., 2021	https://doi.org/10.18140/FLX/1669701
167	Kampar Peninsula, Riau, IndonesiaTropical peatland	Indonesia	Inland wetland	Kampar Peninsula, Riau, Indonesia	NA	Tropical peatland	NA	Tropical peatland	2.19726	0.802	1		0.395204	102.765		Reported annual flux	NA	Deshmukh et al. 2023	Deshmukh et al. 2023	Deshmukh, C.S., Susanto, A.P., Nardi, N. et al. Net greenhouse gas balance of fibre wood plantation on peat in Indonesia. Nature 616, 740–746 (2023). https://doi.org/10.1038/s41586-023-05860-9
385	YamalPermBog	Russia	Inland wetland	Yamal Peninsula, Tyumen Oblast, Russia	PermBog	Treeless subarctic tundra	NA	PermBog	2.25	0.478915	2		68.13	71.7	90	Reported daily average of growing season	Estimated	Heyer et al. 2002	Kuhn et al., 2021	https://doi.org/10.3402/tellusb.v54i3.16663
17	Auchencorth MossBog	United Kingdom	Inland wetland	Auchencorth Moss; Auchenort Moss, UK	NA	Bog; Raised bog	Bog; NA	Bog; Raised bog	2.36357	1.58551	9	0.84843	55.7927	-3.37049	182.5	Measured; Estimated; Reported annual flux	NA	Dinsmore et al. 2009; Drewer et al., 2010	Treat et al., 2018; Evans et al., 2021	Dinsmore KJ, Skiba U, Billett MF, Rees RM, Drewer J (2009b) Spatial and temporal variability in CH4 and N2O fluxes from a Scottish ombrotrophic peatland; implications for modelling and upscaling. Soil Biol Biochem 41:1315–1323; Drewer, J. et al. Comparison of greenhouse gas fluxes and nitrogen budgets from an ombotrophic bog in Scotland and a minerotrophic sedge fen in Finland. Eur. J. Soil Sci. …
68	ChokurdakhUpTundra	Russia	Inland wetland	Chokurdakh, Sakha Republic, Russia	UpTundra	Tundra	NA	UpTundra	2.4	0.498976	1		70.8	147.433	90	Reported daily average of growing season	Estimated	van der Molen 2007	Kuhn et al., 2021	https://doi.org/10.5194/bg-4-985-2007
120	FairbanksPermBog	United States of America	Inland wetland	Fairbanks, Alaska; Fairbanks, Alaska, US	PermBog	-; Bog	NA	PermBog	2.5	5.14075	3		64.8767	-147.617	140	Reported annual and avergae of growing season; Reported daily average of growing season	Estimated	Iwata et al. 2015; Moosavi et al. 1996	Kuhn et al., 2021	https://doi.org/10.1016/j.agrformet.2015.08.252; https://doi.org/10.1029/96GB00358
31	BarrowPermBog	United States of America	Inland wetland	Barrow, Alaska	PermBog	Tundra	NA	PermBog	2.6	0.525724	2		71.31	-156.596	90	Reported daily average of growing season	Estimated	Davidson et al. 2016	Kuhn et al., 2021	https://doi.org/10.1007/s10021-016-9991-0
164	JutlandRiparian wetland	Denmark	Inland wetland	Jutland, Denmark	NA	Riparian wetland	NA	Riparian wetland	2.85714	-0.03	1		55.9267	9.29591		Reported daily and annual flux	NA	Audet et al., 2013	Shuster et al., 2024	Audet, J., et al., Greenhouse gas emissions from a Danish riparian wetland before and after restoration. Ecological Engineering, 2013. 57: p. 170-182.
204	LeducBog	Canada	Inland wetland	Leduc	NA	Bog; permafrost Bog; Palsa	Bog	Bog	2.9744	3.07277	3	2.68611	51.55	-80.175	130	Estimated	NA	Moore et al. 1994	Treat et al., 2018	Moore, T. R., A. Heyes, and N. T. Roulet (1994), Methane Emissions from Wetlands, Southern Hudson-Bay Lowland, Journal of Geophysical Research-Atmospheres, 99(D1), 1455-1467.
79	Corkscrew MarshMarsh	United States of America	Inland wetland	Corkscrew Marsh	NA	Marsh	Marsh	Marsh	3.2	1.168	1		26.3833	-81.5833		Measured	NA	Li & Mitsch 2016	Treat et al., 2018	Li, X., and W. J. Mitsch (2016), Methane emissions from created and restored freshwater and brackish marshes in southwest Florida, USA, Ecological Engineering, 91, 529-536, doi:10.1016/j.ecoleng.2016.01.001.
283	PeaknazeNA	United Kingdom	Inland wetland	Peaknaze	NA	NA	NA	NA	3.59425	1.3119	2		53.47	-1.91		Measured	NA	Levy et al. 2012	Treat et al., 2018	Levy, P. E., et al. (2012). "Methane emissions from soils: synthesis and analysis of a large UK data set." Global Change Biology 18(5): 1657-1669.
15	AtqasukPermBog	United States of America	Inland wetland	Atqasuk, Alaska	PermBog	Tundra	NA	PermBog	3.6	0.659464	2		70.48	-157.42	90	Reported daily average of growing season	Estimated	Davidson et al. 2016	Kuhn et al., 2021	https://doi.org/10.1007/s10021-016-9991-0
340	Subarctic thaw pondShallowWater	Canada	Inland wetland	Subarctic thaw pond	NA	Thaw Pond	ShallowWater	ShallowWater	3.6	2.89921	2	2.68321	55.2667	-77.7667	60	Estimated	NA	Laurion et al. 2010	Treat et al., 2018	Laurion, I., W. F. Vincent, S. MacIntyre, L. Retamal, C. Dupont, P. Francus, and R. Pienitz (2010), Variability in greenhouse gas emissions from permafrost thaw ponds, Limnology and Oceanography, 55(1), 115-133.
33	BarrowUpTundra	United States of America	Inland wetland	Barrow, Alaska; Barrow, Alaska, US; US-Beo, USA; US-Bes, USA	UpTundra; NA	Tundra; Wet/moist coastal tundra; Sedge/grass/moss wetland tundra; Wet tundra; Upland Tundra	NA	UpTundra; Wet tundra	3.6707	0.877988	9		71.9058	-126.491	90	Reported daily average of growing season; Reporeted annual flux; Reported annual and avergae of growing season	Estimated; NA	Davidson et al. 2016; Rhew et al. 2007; von Fischer et al. 2010; Zona et al., 2020; Jorgensen et al. 2014	Kuhn et al., 2021; Delwich et al., 2021	https://doi.org/10.1007/s10021-016-9991-0; https://doi.org/10.1029/2006JG000314; https://doi.org/10.1029/2009JG001283; https://doi.org/10.18140/FLX/1669679; NA
197	Labrador Hollow Unique AreaSwamp	United States of America	Inland wetland	Labrador Hollow Unique Area	NA	Swamp	Swamp	Swamp	3.8707	0.85574	2		42.75	-76.0167		Measured	NA	Basiliko et al.; Coles & Yavitt 2004	Treat et al., 2018	Coles, J. R., & Yavitt, J. B. (2004). Linking belowground carbon allocation to anaerobic CH4 and CO2 production in a forested peatland, New York State. Geomicrobiology Journal, 21(7), 445-455.
4	ARM−NSA−BarrowWet tundra	United States of America	Inland wetland	US-A10, USA	NA	Wet tundra	NA	Wet tundra	3.95507	1.4436	1		71.324	-156.615		Reporeted seasonal flux (January, August, September)	NA	Billesbach et al., 2020	Delwich et al., 2021	https://doi.org/10.18140/FLX/1669661
234	MigneintBog	United Kingdom	Inland wetland	Migneint	NA	Bog	Bog	Bog	4.2854	1.1	1	0.2	52.9961	-3.78195	210	Measured	NA	Kang and Freeman 2002	Treat et al., 2018	Kang, H. & Freeman, C. Water, Air, & Soil Pollution (2002) 141: 263. doi:10.1023/A:1021324326859
103	DenaliUpTundra	United States of America	Inland wetland	Denali, Alaska	UpTundra	Alpine Tundra	NA	UpTundra	4.34	0.758432	1		63.88	-149.22	90	Reported annual and avergae of growing season	Estimated	Taylor et al. 2018	Kuhn et al., 2021	https://doi.org/10.1029/2018JG004444
357	ToolikBog	Alaska	Inland wetland	Toolik	NA	Tundra	Bog	Bog	4.45	0.750259	2	0.36524	68.6333	-149.6	90	Estimated	NA	Oberbauer et al. 1998	Treat et al., 2018	Oberbauer, S. F., G. Starr, and E. W. Pop (1998), Effects of extended growing season and soil warming on carbon dioxide and methane exchange of tussock tundra in Alaska, J. Geophys. Res., 103(D22), 29075-29082.
156	Imnavait Creek Watershed Wet Sedge TundraWet tundra	United States of America	Inland wetland	US-ICs, USA	NA	Wet tundra	NA	Wet tundra	4.50438	1.6441	1		68.606	-149.311		Reporeted seasonal flux (January, August, September)	NA	Euskirchen et al., 2020	Delwich et al., 2021	https://doi.org/10.18140/FLX/1669668
417	PBW-PA	United States of America	Inland wetland	Padilla Bay Wet Pasture				Non-tidal wet pasture	4.64658	1.696	1		48.4571	-122.47		Annual flux was estimated from Arias-Oritz et al., 2024		Williams et al., 2024	Arias-Oritz et al., 2024	Janousek, Christopher; Williams, Trevor; McKeon, Maggie; Bridgham, Scott D.; Cornu, Craig; Diefenderfer, Heida; et al. (2025). Dataset: Fluxes of carbon dioxide, methane, and nitrous oxide and associated environmental data from estuarine wetlands in the Pacific Northwest, USA. Smithsonian Environmental Research Center. Dataset. https://doi.org/10.25573/serc.27161883
106	DiskoPermWet	Greenland	Inland wetland	Disko Island, West Greenland	PermWet	Wet Tundra	NA	PermWet	5.38	0.897521	1		69.67	-52	90	Reported daily average of growing season	Estimated	Christiansen et al. 2015	Kuhn et al., 2021	https://doi.org/10.1007/s10533-014-0026-7
337	StordalenPermBog	Sweden	Inland wetland	Stordalen, Sweden	PermBog	Palsa complex	NA	PermBog	5.46667	1.54333	3		68.37	19.05	90	Reported daily average of growing season	Estimated	Svensson et al. 1999	Kuhn et al., 2021	https://doi.org/10.5194/bg-7-95-2010
266	NorthernPermBog	Russia	Inland wetland	Northern Kanin Peninsula, Archangelsk Oblast, Russia; Northern Yamal Peninsula,Tyumen Oblast, Russia	PermBog	Mesic Tundra; Wet tundra	NA	PermBog	5.56667	0.922486	3		71.2967	62.2778	90	Reported daily average of growing season	Estimated; Reported	Christensen et al. 1999	Kuhn et al., 2021	http://www.jstor.org/stable/4314888
297	SalmisuoBog	Finland	Inland wetland	Salmisuo	NA	Bog	Bog	Bog	5.6	5.2	1	1.33333	62.8167	30.8833		Measured	NA	Alm et al.1999	Treat et al., 2018	Alm, J., S. Saarnio, H. Nykanen, J. Silvola, and P. J. Martikainen (1999), Winter CO2, CH4 and N2O fluxes on some natural and drained boreal peatlands, Biogeochemistry, 44(2), 163-186.
402	interior fenFen	Canada	Inland wetland	interior fen	NA	Fen; permafrost Bog; Palsa	Fen	Fen	5.95386	3.46667	5	2.69267	51.5167	-80.45	130	Estimated	NA	Moore et al. 1994	Treat et al., 2018	Moore, T. R., A. Heyes, and N. T. Roulet (1994), Methane Emissions from Wetlands, Southern Hudson-Bay Lowland, Journal of Geophysical Research-Atmospheres, 99(D1), 1455-1467.
73	Clay BeltSwamp	Canada	Inland wetland	Clay Belt	NA	Swamp	Swamp	Swamp	6.32	3.64363	5	2.69563	49	-80	150	Estimated	NA	Bubier 1995 J ecol	Treat et al., 2018	Bubier, J. L. (1995), The Relationship of Vegetation to Methane Emission and Hydrochemical Gradients in Northern Peatlands, Journal of Ecology, 83(3), 403-420.
16	AtqasukWet tundra	United States of America	Inland wetland	US-Atq, USA	NA	Wet tundra	NA	Wet tundra	6.48192	2.3659	1		70.47	-157.409		Reporeted annual flux	NA	Zona et al., 2020	Delwich et al., 2021	https://doi.org/10.18140/FLX/1669679
10	AlbertaBog	Canada	Inland wetland	Alberta, Canada	NA	Bog	NA	Bog	6.58182	1.61202	2		54.3077	-112.612		Reported daily and annual flux	NA	Bieniada et al., 2011; Murray et al., 2011	Shuster et al., 2024	Bieniada, A. and M. Strack, Steady and ebullitive methane fluxes from active, restored and unrestored horticultural peatlands. Ecological Engineering, 2021. 169: p. 106324.; Murray, K.R., et al., Restoration approach influences carbon exchange at in-situ oil sands exploration sites in east-central Alberta. Wetlands Ecology and Management, 2021. 29(2): p. 281-299.
395	YukonUpTundra	United States of America	Inland wetland	Yukon Delta, Alaska, US	UpTundra	Upland Tundra	NA	UpTundra	6.8	4.16098	2		60.915	-161.875	120	Reported daily average of growing season	Estimated	Bartlett et al. 1992; Fan et al. 1992	Kuhn et al., 2021	https://doi.org/10.1029/91JD00610
97	Cwm-y-GlowSwamp	United Kingdom	Inland wetland	Cwm-y-Glow	NA	Alder Carr	Swamp	Swamp	6.8437	4	1	2.5	53.1409	-4.16324	210	Measured	NA	Kang and Freeman 2002	Treat et al., 2018	Kang, H. & Freeman, C. Water, Air, & Soil Pollution (2002) 141: 263. doi:10.1023/A:1021324326859
70	Clay BeltBog	Canada	Inland wetland	Clay Belt	NA	Bog	Bog	Bog	7.42308	3.81189	13	2.69843	49	-80	150	Estimated	NA	Bubier 1995 J ecol	Treat et al., 2018	Bubier, J. L. (1995), The Relationship of Vegetation to Methane Emission and Hydrochemical Gradients in Northern Peatlands, Journal of Ecology, 83(3), 403-420.
339	StorflaketBog	Sweden	Inland wetland	Storflaket	NA	Palsa	Bog	Bog	7.56	1.52641	1	0.619213	68.3333	18.9667	120	Estimated	NA	Lund et al. 2009	Treat et al., 2018	Lund, M., T. R. Christensen, M. Mastepanov, A. Lindroth, and L. Ström (2009), Effects of N and P fertilization on the greenhouse gas exchange in two northern peatlands with contrasting N deposition rates, Biogeosciences, 6(10), 2135-2144, doi:10.5194/bg-6-2135-2009.
287	QuebecBog	Canada	Inland wetland	Quebec, Canada	NA	Bog	NA	Bog	7.82051	740.958	2		48.1337	-69.1476		Reported daily and annual flux	NA	Lazcanoet al., 2018; Strack et al., 2008	Shuster et al., 2024	Lazcano, C., et al., Short-term effects of fen peatland restoration through the moss layer transfer technique on the soil CO2 and CH4 efflux. Ecological Engineering, 2018. 125: p. 149-158.; Strack, M. and Y. Zuback, Annual carbon balance of a peatland 10 yr following restoration. Biogeosciences, 2013. 10(5): p. 2885-2896.
238	Moor HouseBog	United Kingdom	Inland wetland	Moor House	NA	Bog; Blanket Bog	Bog	Bog	7.82255	3.00121	2	0.297045	54.65	-2.45	153	Measured	NA	Levy et al. 2012; Ward et al. 2013	Treat et al., 2018	Ward, S. E., et al. (2013). "Warming effects on greenhouse gas fluxes in peatlands are modulated by vegetation composition." Ecology Letters 16(10): 1285-1293.
288	Quistocochaforest reserve, Loreto, PeruPalm swamp forest	Peru	Inland wetland	Quistocochaforest reserve, Loreto, Peru	NA	Palm swamp forest	NA	Palm swamp forest	7.96507	2.90725	1		-3.83442	-73.3189		Reported annual flux	NA	Griffis et al. 2020	Deshmukh et al. 2023	Griffis, T.J., Roman, D.T., Wood, J.D., Deventer, J., Fachin, L., Rengifo, J., Castillo, D.D., Lilleskov, E., Kolka, R., Chimner, R.A., Aguila-Pasquel, J., Wayson, C., Hergoualc'h, K., Baker, J.M., Cadillo-Quiroz, H., Ricciuto, D.M. (2020). Hydrometeorological sensitivies of net ecosystem carbon dioxide and methane exchange of an Amazonian palm swamp peatland. Agricultural and Forest Meteorlogy. …
161	IvotukPermBog	United States of America	Inland wetland	Ivotuk, Alaska	PermBog	Tundra	NA	PermBog	8.66667	1.33708	3		68.82	155.74	90	Reported daily average of growing season	Estimated	Davidson et al. 2016	Kuhn et al., 2021	https://doi.org/10.1007/s10021-016-9991-0
249	NGEE Arctic BarrowWet tundra	United States of America	Inland wetland	US-NGB, USA	NA	Wet tundra	NA	Wet tundra	8.82566	3.22137	1		71.28	-156.609		Reporeted annual flux	NA	Torn et al., 2020	Delwich et al., 2021	https://doi.org/10.18140/FLX/1669688
418	SAU-PA	United States of America	Inland wetland	Sause Pasture				Non-tidal dry pasture	8.94247	3.264	1		43.3683	-124.184		Annual flux was estimated from Arias-Oritz et al., 2024		Williams et al., 2024	Arias-Oritz et al., 2024	Janousek, Christopher; Williams, Trevor; McKeon, Maggie; Bridgham, Scott D.; Cornu, Craig; Diefenderfer, Heida; et al. (2025). Dataset: Fluxes of carbon dioxide, methane, and nitrous oxide and associated environmental data from estuarine wetlands in the Pacific Northwest, USA. Smithsonian Environmental Research Center. Dataset. https://doi.org/10.25573/serc.27161883
193	La GuetteFen	France	Inland wetland	FR-LGt, France	NA	Fen	NA	Fen	8.97215	3.27483	1		47.323	2.284		Reporeted annual flux	NA	Jacotot et al., 2020	Delwich et al., 2021	https://doi.org/10.18140/FLX/1669641
250	NGEE Arctic CouncilWet tundra	United States of America	Inland wetland	US-NGC, USA	NA	Wet tundra	NA	Wet tundra	9.22849	3.3684	1		64.861	-163.701		Reporeted annual flux	NA	Torn et al., 2020	Delwich et al., 2021	https://doi.org/10.18140/FLX/1669688
209	LenaPermBog	Russia	Inland wetland	Lena Delta, Sakha Republic, Russia	PermBog	Wet polygonal tundra; Polygonal tundra	NA	PermBog	9.325	38.17	4		72.37	126.5	90	Reported daily average of growing season	Estimated	Sachs et al. 2008; Sachs et al. 2010; Wagner et al. 2003	Kuhn et al., 2021	https://doi.org/10.1029/2007JG000505; https://doi.org/10.1002/ppp.443
400	coastal fenFen	Canada	Inland wetland	coastal fen	NA	Fen	Fen	Fen	9.4423	3.92787	4	2.70037	51.4667	-80.6167	130	Estimated	NA	Moore et al. 1994	Treat et al., 2018	Moore, T. R., A. Heyes, and N. T. Roulet (1994), Methane Emissions from Wetlands, Southern Hudson-Bay Lowland, Journal of Geophysical Research-Atmospheres, 99(D1), 1455-1467.
320	SiikajokiBog	Finland	Inland wetland	Siikajoki, Finland	NA	Bog	NA	Bog	9.6	2.64514	1		64.761	24.5948		Reported daily and annual flux	NA	Laine et al., 2019	Shuster et al., 2024	Laine, A.M., et al., Impacts of drainage, restoration and warming on boreal wetland greenhouse gas fluxes. Science of the Total Environment, 2019. 647: p. 169-181.
391	Yongqing Forestry CenterSwamp	China	Inland wetland	Yongqing Forestry Center	NA	Thicket Swamp	Swamp	Swamp	9.6	3.34327	1	1.74007	48.1167	128.633	167	Estimated	NA	Sun et al. 2011	Treat et al., 2018	Sun, X., et al. (2011). "Seasonal and spatial variations of methane emissions from montane wetlands in Northeast China." Atmospheric Environment 45(10): 1809-1816.
415	JRW-PA	United States of America	Inland wetland	Johns River South Pasture				Non-tidal wet pasture	9.86301	3.6	1		46.8934	-123.988		Annual flux was estimated from Arias-Oritz et al., 2024		Williams et al., 2024	Arias-Oritz et al., 2024	Janousek, Christopher; Williams, Trevor; McKeon, Maggie; Bridgham, Scott D.; Cornu, Craig; Diefenderfer, Heida; et al. (2025). Dataset: Fluxes of carbon dioxide, methane, and nitrous oxide and associated environmental data from estuarine wetlands in the Pacific Northwest, USA. Smithsonian Environmental Research Center. Dataset. https://doi.org/10.25573/serc.27161883
165	Kaamanen-	Finland	Inland wetland	Kaamanen, Finland	-	Aapa mire	NA	-	10.4	1.5689	1		69.13	27.2667	90	Reported annual and avergae of growing season	Estimated	Hargreaves et al. 2001	Kuhn et al., 2021	https://doi.org/10.1007/s007040170015
379	Wet sitesSwamp	Canada	Inland wetland	Wet sites	NA	Upland	Swamp	Swamp	10.4	3.832	1		45.55	-73.3833		Measured	NA	Ullah & Moore 2011	Treat et al., 2018	Ullah, S., and T. R. Moore (2011), Biogeochemical controls on methane, nitrous oxide, and carbon dioxide fluxes from deciduous forest soils in eastern Canada, J. Geophys. Res., 116, G03010, doi:10.1029/2010JG001525.
404	tamarack fenFen	Canada	Inland wetland	tamarack fen	NA	Fen	Fen	Fen	10.4808	4.06515	4	2.70265	51.3	-80.6333	130	Estimated	NA	Moore et al. 1994	Treat et al., 2018	Moore, T. R., A. Heyes, and N. T. Roulet (1994), Methane Emissions from Wetlands, Southern Hudson-Bay Lowland, Journal of Geophysical Research-Atmospheres, 99(D1), 1455-1467.
172	KineosheoShallowWater	Canada	Inland wetland	Kineosheo	NA	Pool	ShallowWater	ShallowWater	10.6154	4.08295	1	2.70295	51.55	-80.175	130	Estimated	NA	Moore et al. 1994	Treat et al., 2018	Moore, T. R., A. Heyes, and N. T. Roulet (1994), Methane Emissions from Wetlands, Southern Hudson-Bay Lowland, Journal of Geophysical Research-Atmospheres, 99(D1), 1455-1467.
285	PechoraPermBog	Russia	Inland wetland	Pechora Bay, Archangelsk Oblast, Russia	PermBog	Mesic Tundra; Wet tundra	NA	PermBog	11.45	1.70932	2		68.5	52.7833	90	Reported daily average of growing season	Estimated	Christensen et al. 1999	Kuhn et al., 2021	http://www.jstor.org/stable/4314888
43	BonanzaPermWet	United States of America	Inland wetland	Bonanza Creek, Alaska, US	PermWet	Poorly drained lowland near Tanana River	NA	PermWet	11.5	4.43433	1		64.68	-148.317	150	Reported annual and avergae of growing season	Estimated	Wickland et al. 2006	Kuhn et al., 2021	https://doi.org/10.1029/2005JG000099
186	Kuparuk-	United States of America	Inland wetland	Kuparuk catchment, Alaska, US	UpTundra; -	Barrens; non-acidic tundra; Shrublands; Acidic tundra; Wet tundra	NA	UpTundra; -	11.9128	1.77122	14		69.47	-147.82	90	Reported annual and avergae of growing season	Estimated; Reported	Reeburgh et al. 1998	Kuhn et al., 2021	https://doi.org/10.1029/98JD00993
403	interior fenShallowWater	Canada	Inland wetland	interior fen	NA	pool	ShallowWater	ShallowWater	12	4.266	2	2.706	51.5167	-80.45	130	Estimated	NA	Moore et al. 1994	Treat et al., 2018	Moore, T. R., A. Heyes, and N. T. Roulet (1994), Methane Emissions from Wetlands, Southern Hudson-Bay Lowland, Journal of Geophysical Research-Atmospheres, 99(D1), 1455-1467.
26	BarkcharBog	Russia	Inland wetland	Barkchar, West Siberia, Russia	Bog	Boreal Peatland	NA	Bog	12.4	4.57162	1		56.97	82.6	150	Reported daily average of growing season	Estimated	Veretennikova & Dyukarev, 2017	Kuhn et al., 2021	https://doi.org/10.3103/S1068373917050077
28	BarkcharPermBog	Russia	Inland wetland	Barkchar, West Siberia, Russia	PermBog	Boreal Peatland	NA	PermBog	12.7	4.61739	1		56.97	82.6	150	Reported daily average of growing season	Estimated	Veretennikova & Dyukarev, 2017	Kuhn et al., 2021	https://doi.org/10.3103/S1068373917050077
259	NorthPointFen	Canada	Inland wetland	North Point - Kinosheo transect, Hudson Bay lowlands, Canada	Fen	Interior fen	NA	Fen	12.8	3.40786	1		51.52	-80.45	130	Reported daily average of growing season	Estimated	Moore et al. 1994	Kuhn et al., 2021	https://doi.org/10.1029/93JD02457
9	Alberta, Canada Marsh	Canada	Inland wetland	Alberta, Canada	NA	Marsh	NA	Marsh	13.03	4.75546	2		53.1763	-113.121		Reported annual flux	NA	Badiou et al., 2011	Ma et al. 2024	Badiou, Pascal & McDougal, Rhonda & Pennock, Dan & Clark, Bob. (2011). Greenhouse gas emissions and carbon sequestration potential in restored wetlands of the Canadian prairie pothole region. Wetlands Ecology and Management. 19. 237-256. 10.1007/s11273-011-9214-6.
308	Schechenfilz NordBog	Germany	Inland wetland	DE-SfN, Germany	NA	Bog	NA	Bog	13.2568	4.83873	1		47.806	11.328		Reporeted annual flux	NA	Schmid et al., 2020	Delwich et al., 2021	https://doi.org/10.18140/FLX/1669635
98	DaringBog	Canada	Inland wetland	Daring Lake, NWT, Canada	Bog	Tundra	NA	Bog	13.82	3.25848	1		64.97	-111.567	150	Reported daily average of growing season	Reported	Riley 2018	Kuhn et al., 2021	https://curve.carleton.ca/14ff7715-0408-4de1-9d85-2365407e3fad
[truncated: 312 more rows]

## Sheet: river
No	Name	Country	Ecosystem_type	Name_detail	Methaneflux_mgCH4m2d1	Methaneflux_mgCH4m2d1_sd	Methaneflux_gch4m2yr1	Aggregrated_flux	Lat	Lon	Pathway	Exclude	Channel_type	Estimated_icefree_days	Basin_region	Reference	Source	DOI
[truncated: 1,921 more rows]

## Sheet: tidal wetland
No	Name	Country	Ecosystem_type	Wetland_class	Methaneflux_mgCH4m2d1	Methaneflux_gch4m2yr1	Lat	Lon	Interface	Salinity	Impact_class	Reference	Source	Estimated_flux_measure	Method	Full ref
[truncated: 214 more rows]

[truncated: 7 more sheets: mangrove, seagrass, estuary, lagoon, fjord, nearshore, contiental shelf]
