# Supplementary material
Source: Research Square preprint supplement (doi:10.21203/rs.3.rs-8903639/v1)
Supplement: Supplementary file 2 [file 6e47688fa9ed57661cd96c5c.xlsx]

## Sheet: Metadata
Small lake and pond	Description
No	Sample No
Name	Site name
Ecosystem_type	Ecosystem type defined for this study (Text S1)
Country	Country
Lat	Latitude
Lon	Longitude
Carbon_gCm2yr	Carbon burial rates (g C m-2 yr-1)
Area_km2	Surface area of site (km2)
Max_depth_m	Maximum water depth of the site (m)
Mean_depth_m	Mean water depth of the site (m)
Reference	Author name and year of the original data
Source	Review or secondary publication where the original reference was identified and compiled
Comments	Additional comments
Lake
No	Sample No
Name	Site name
Ecosystem_type	Ecosystem type defined for this study (Text S1)
Country	Country
Lat	Latitude
Lon	Longitude
Carbon_gCm2yr	Carbon burial rates (g C m-2 yr-1)
Area_km2	Surface area of site (km2)
Max_depth_m	Maximum water depth of the site (m)
Mean_depth_m	Mean water depth of the site (m)
Reference	Author name and year of the original data
Source	Review or secondary publication where the original reference was identified and compiled
Reservoir
No	Sample No
Name	Site name
Ecosystem_type	Ecosystem type defined for this study (Text S1)
Country	Country
Lat	Latitude
Lon	Longitude
Carbon_gCm2yr	Carbon burial rates (g C m-2 yr-1)
Area_km2	Area of the reservoir (Km2)
Max_depth_m	Maximum water depth of the site (m)
Mean_depth_m	Mean water depth of the site (m)
Reference	Author name and year of the original data
Source	Review or secondary publication where the original reference was identified and compiled
Comments
Inland wetland
No	Sample No
Name	Site name
Country	Country
Ecosystem_type	Ecosystem type defined for this study (Text S1)
Wetland_Reported	Wetland description of the study site
Lat	Latitude
Lon	Longitude
Carbon_gCm2yr	Carbon burial rates (g C m-2 yr-1)
Reference	Author name and year of the original data
Source	Review or secondary publication where the original reference was identified and compiled.
Tidal wetland
No	Sample No
Name	Site name
Ecosystem_type	Ecosystem type defined for this study (Text S1)
Country	Country
Carbon_gCm2yr	Carbon burial rates (g C m-2 yr-1)
Lat	Latitude
Lon	Longitude
Reference	Author name and year of the original data
Source	Review or secondary publication where the original reference was identified and compiled
Mangrove
No	Sample No
Name	Site name
Country	Country
Ecosystem_type	Ecosystem type defined for this study (Text S1)
Carbon_gCm2yr	Carbon burial rates (g C m-2 yr-1)
Lat	Latitude
Lon	Longitude
Reference	Author name and year of the original data
Source	Review or secondary publication where the original reference was identified and compiled.
Seagrass
No	Sample No
Name	Site name
Country	Country
Ecosystem_type	Ecosystem type defined for this study (Text S1)
Carbon_gCm2yr	Carbon burial rates (g C m-2 yr-1)
Lat	Latitude
Lon	Longitude
Dating_method	Dating method provided by source
Seagrass_status	Status of seagrass (intact or restored)
Reference	Author name and year of the original data
Source	Review or secondary publication where the original reference was identified and compiled
Estuary
No	Sample No
Name	Site name
Country	Country
Ecosystem_type	Ecosystem type defined for this study (Text S1)
Carbon_gCm2yr	Carbon burial rates (g C m-2 yr-1)
Depth_below_seafloor_m	Depth below seafloor (m)
Depth_in_sediment_m	Sampling sediment depth (m)
Lat	Latitude
Lon	Longitude
Reference	Author name and year of the original data
Source	Review or secondary publication where the original reference was identified and compiled.
Lagoon
No	Sample No
Name	Site name
Country	NA
Ecosystem_type	Ecosystem type defined for this study (Text S1)
Carbon_gCm2yr	Carbon burial rates (g C m-2 yr-1)
Lat	Latitude
Lon	Longitude
Dating_method	Method of dataing the burial rate
Site_description	Site description provided by source
Reference	Author name and year of the original data
Source	Review or secondary publication where the original reference was identified and compiled.
Fjord
No	Sample No
Name	Site name
Country	Country
Ecosystem_type	Ecosystem type defined for this study (Text S1)
Carbon_gCm2yr	Carbon burial rates (g C m-2 yr-1)
Lat	Latitude
Lon	Longitude
Reference	Author name and year of the original data
Source	Review or secondary publication where the original reference was identified and compiled.
Nearshore ocean
No	Sample No
Name	Site name
Ecosystem_type	Ecosystem type defined for this study (Text S1)
Depth_below_seafloor_m	Depth below seafloor (m)
Sampling_sediment_depth_m	Sampling sediment depth (m)
Carbon_gCm2yr	Carbon burial rates (g C m-2 yr-1)
Lat	Latitude
Lon	Longitude
Reference	Author name and year of the original data
Source	Review or secondary publication where the original reference was identified and compiled.
Continental shelf
No	Sample No
Name	Site name
Ecosystem_type	Ecosystem type defined for this study (Text S1)
Depth_below_seafloor_m	Depth below seafloor (m)
Sampling_sediment_depth_m	Sampling sediment depth (m)
Carbon_gCm2yr	Carbon burial rates (g C m-2 yr-1)
Lat	Latitude
Lon	Longitude
Reference	Author name and year of the original data
Source	Review or secondary publication where the original reference was identified and compiled.

## Sheet: small lake and pond
No	Name	Ecosystem_type	Country	Lat	Lon	Carbon_gCm2yr	Area_km2	Max_depth_m	Mean_depth_m	Reference	Source	Comments
1	Aerjilin	Small lake and Pond	China	39.726	102.275	11	0.073	NA	NA	Wang et al., 2018	Ray et al., in Review; Anderson et al., 2020; Amora Noguera 2022
2	Ahmik	Small lake and Pond	United States of America	48.1479	-88.5415	88.3818	0.083301	NA	NA	Anderson et al., 2020	Ray et al., in Review; Anderson et al., 2020; Amora Noguera 2022
3	Akokala	Small lake and Pond	United States of America	48.8789	-114.198	25.4732	0.0935394	6.4	NA	Mendonca et al., 2017	Ray et al., in Review; Anderson et al., 2020; Amora Noguera 2022
4	Arctic Lake	Small lake and Pond	United States of America	44.7203	-93.4575	555.607	0.098	NA	NA	Anderson et al., 2020	Ray et al., in Review; Anderson et al., 2020; Amora Noguera 2022
5	Arrowhead Lake	Small lake and Pond	United States of America	44.8858	-93.3935	99.9597	0.081	NA	NA	Anderson et al., 2020	Ray et al., in Review; Anderson et al., 2020; Amora Noguera 2022
6	AT7	Small lake and Pond	Greenland	66.97	-53.59	1.03	0.065	20	NA	Anderson et al., 2019	Ray et al., in Review; Anderson et al., 2020; Amora Noguera 2022
7	Augher Lough	Small lake and Pond	Ireland	54.3	-7.1	146	0.09	15	NA	Mendonca et al., 2017	Ray et al., in Review; Anderson et al., 2020; Amora Noguera 2022
8	Baby Lake	Small lake and Pond	United States of America	45.5304	-95.4949	62.4666	0.047	NA	NA	Anderson et al., 2020	Ray et al., in Review; Anderson et al., 2020; Amora Noguera 2022
9	Badan	Small lake and Pond	China	39.5514	102.365	1	0.003	NA	NA	Wang et al., 2018	Ray et al., in Review; Anderson et al., 2020; Amora Noguera 2022
10	Bald	Small lake and Pond	United States of America	40.868	-110.493	6.88	0.022	NA	7	Munroe and Bencher, 2019	Ray et al., in Review; Anderson et al., 2020; Amora Noguera 2022
11	Lough Ballywillin	Small lake and Pond	United Kingdom	54.4058	-5.72028	147.092	0.035	6	NA	Anderson et al., 2020	Ray et al., in Review; Anderson et al., 2020; Amora Noguera 2022
12	Bangou Bi	Small lake and Pond	Niger	13.5089	2.20083	213	0.06	3.5	NA	Mendonca et al., 2017	Ray et al., in Review; Anderson et al., 2020; Amora Noguera 2022
13	Barney Mundt	Small lake and Pond	United States of America	42.0333	-95.375	4864	0.016	NA	NA	Downing et al., 2008	Ray et al., in Review; Anderson et al., 2020; Amora Noguera 2022	Agriculturally eutrophic
14	Batoda	Small lake and Pond	Uganda	0.298146	29.8835	105.73	0.054	NA	NA	Anderson et al., 2020	Ray et al., in Review; Anderson et al., 2020; Amora Noguera 2022
15	Betton Pool	Small lake and Pond	United Kingdom	52.666	-2.725	271.032	0.06	11	NA	Mendonca et al., 2017	Ray et al., in Review; Anderson et al., 2020; Amora Noguera 2022
16	Big Pool Ambergris Key	Small lake and Pond	Belize	17.8818	-88.0136	47.8078	0.0003	NA	NA	Anderson et al., 2020	Ray et al., in Review; Anderson et al., 2020; Amora Noguera 2022
17	Black	Small lake and Pond	United States of America	40.2653	-105.641	8.97395	0.0315861	30	NA	Mendonca et al., 2017	Ray et al., in Review; Anderson et al., 2020; Amora Noguera 2022
18	Blakesly Lake	Small lake and Pond	United States of America	47.2706	-95.442	186.448	0.034	NA	NA	Anderson et al., 2020	Ray et al., in Review; Anderson et al., 2020; Amora Noguera 2022
19	C. A. Stiles	Small lake and Pond	United States of America	42.7333	-95.625	702	0.054	NA	NA	Downing et al., 2008	Ray et al., in Review; Anderson et al., 2020; Amora Noguera 2022	Agriculturally eutrophic
20	Chaonaqiu	Small lake and Pond	China	35.16	106.19	4	0.02	9	NA	Wang et al., 2018	Ray et al., in Review; Anderson et al., 2020; Amora Noguera 2022
21	Charles Fienhold	Small lake and Pond	United States of America	42.0333	-95.375	17392	0.008	NA	NA	Downing et al., 2008	Ray et al., in Review; Anderson et al., 2020; Amora Noguera 2022	Agriculturally eutrophic
22	Clever	Small lake and Pond	Canada	49.17	-57.768	9.12091	0.015	NA	NA	Anderson et al., 2020	Ray et al., in Review; Anderson et al., 2020; Amora Noguera 2022
23	Cliff	Small lake and Pond	United States of America	58.24	-135.842	7.99786	0.019	NA	NA	Anderson et al., 2020	Ray et al., in Review; Anderson et al., 2020; Amora Noguera 2022
24	Coon Stump Lake	Small lake and Pond	United States of America	46.2278	-94.4279	41.7444	0.035	NA	NA	Anderson et al., 2020	Ray et al., in Review; Anderson et al., 2020; Amora Noguera 2022
25	Cornell Experimental Pond - 201	Small lake and Pond	United States of America	42.5026	-76.4369	113.433	0.0009	2.1	NA	Holgerson et al., 2024	Ray et al., in Review
26	Cornell Experimental Pond - 202	Small lake and Pond	United States of America	42.5026	-76.4369	94.817	0.0009	2.1	NA	Holgerson et al., 2024	Ray et al., in Review
27	Cornell Experimental Pond - 203	Small lake and Pond	United States of America	42.5026	-76.4369	58.983	0.0009	2.1	NA	Holgerson et al., 2024	Ray et al., in Review
28	Cornell Experimental Pond - 204	Small lake and Pond	United States of America	42.5026	-76.4369	85.588	0.0009	2.1	NA	Holgerson et al., 2024	Ray et al., in Review
29	Cornell Experimental Pond - 219	Small lake and Pond	United States of America	42.5026	-76.4369	78.013	0.0009	2.1	NA	Holgerson et al., 2024	Ray et al., in Review
30	Cornell Experimental Pond - 220	Small lake and Pond	United States of America	42.5026	-76.4369	57.834	0.0009	2.1	NA	Holgerson et al., 2024	Ray et al., in Review
31	Cornell Experimental Pond - 221	Small lake and Pond	United States of America	42.5026	-76.4369	49.95	0.0009	2.1	NA	Holgerson et al., 2024	Ray et al., in Review
32	Cornell Experimental Pond - 222	Small lake and Pond	United States of America	42.5026	-76.4369	63.452	0.0009	2.1	NA	Holgerson et al., 2024	Ray et al., in Review
33	Cornell Experimental Pond - 223	Small lake and Pond	United States of America	42.5026	-76.4369	40.537	0.0009	2.1	NA	Holgerson et al., 2024	Ray et al., in Review
34	Cornell Experimental Pond - 224	Small lake and Pond	United States of America	42.5026	-76.4369	104.792	0.0009	2.1	NA	Holgerson et al., 2024	Ray et al., in Review
35	Cornell Experimental Pond - 237	Small lake and Pond	United States of America	42.5026	-76.4369	113.645	0.0009	2.1	NA	Holgerson et al., 2024	Ray et al., in Review
36	Cornell Experimental Pond - 239	Small lake and Pond	United States of America	42.5026	-76.4369	59.534	0.0009	2.1	NA	Holgerson et al., 2024	Ray et al., in Review
37	Cornell Experimental Pond - 241	Small lake and Pond	United States of America	42.5026	-76.4369	43.71	0.0009	2.1	NA	Holgerson et al., 2024	Ray et al., in Review
38	Cornell Experimental Pond - 242	Small lake and Pond	United States of America	42.5026	-76.4369	56.523	0.0009	2.1	NA	Holgerson et al., 2024	Ray et al., in Review
39	Cornell Experimental Pond - 243	Small lake and Pond	United States of America	42.5026	-76.4369	54.766	0.0009	2.1	NA	Holgerson et al., 2024	Ray et al., in Review
40	Cornell Experimental Pond - 244	Small lake and Pond	United States of America	42.5026	-76.4369	45.814	0.0009	2.1	NA	Holgerson et al., 2024	Ray et al., in Review
41	Cornell Experimental Pond - 245	Small lake and Pond	United States of America	42.5026	-76.4369	64.435	0.0009	2.1	NA	Holgerson et al., 2024	Ray et al., in Review
42	Cornell Experimental Pond - 246	Small lake and Pond	United States of America	42.5026	-76.4369	55.81	0.0009	2.1	NA	Holgerson et al., 2024	Ray et al., in Review
43	Cornell Experimental Pond - 247	Small lake and Pond	United States of America	42.5026	-76.4369	45.412	0.0009	2.1	NA	Holgerson et al., 2024	Ray et al., in Review
44	Cornell Experimental Pond - 248	Small lake and Pond	United States of America	42.5026	-76.4369	70.778	0.0009	2.1	NA	Holgerson et al., 2024	Ray et al., in Review
45	Cornell Experimental Pond - 249	Small lake and Pond	United States of America	42.5026	-76.4369	79.749	0.0009	2.1	NA	Holgerson et al., 2024	Ray et al., in Review
46	Cornell Experimental Pond - 250	Small lake and Pond	United States of America	42.5026	-76.4369	38.343	0.0009	2.1	NA	Holgerson et al., 2024	Ray et al., in Review
47	Crocker Pond	Small lake and Pond	United States of America	44.3086	-70.8242	28.2999	0.0386532	2.134	NA	Mendonca et al., 2017	Ray et al., in Review; Anderson et al., 2020; Amora Noguera 2022
48	De Waay	Small lake and Pond	Netherlands	51.932	5.14978	92.1	0.013	15	NA	Mendonca et al., 2017	Ray et al., in Review; Anderson et al., 2020; Amora Noguera 2022
49	Deepwater Lake	Small lake and Pond	United States of America	47.6209	-92.825	25.5916	0.08	NA	NA	Anderson et al., 2020	Ray et al., in Review; Anderson et al., 2020; Amora Noguera 2022
50	Dickman Lake	Small lake and Pond	United States of America	44.8618	-93.0797	60.2332	0.093	NA	NA	Anderson et al., 2020	Ray et al., in Review; Anderson et al., 2020; Amora Noguera 2022
51	Disko 2	Small lake and Pond	Greenland	69.391	-53.402	6.7	0.0796	NA	NA	Stevenson et al., 2021	Ray et al., in Review; Anderson et al., 2020; Amora Noguera 2022
52	Dlugi Staw DLUG 93/1	Small lake and Pond	Poland	49.227	20.011	10.1555	0.013	NA	NA	Anderson et al., 2020	Ray et al., in Review; Anderson et al., 2020; Amora Noguera 2022
53	Dobrazek	Small lake and Pond	Poland	53.8306	20.7944	405	0.093	2.5	NA	Skwierawski, 2022	Ray et al., in Review; Anderson et al., 2020; Amora Noguera 2022
54	Dundejilin	Small lake and Pond	China	39.594	102.262	28	0.051	NA	NA	Wang et al., 2018	Ray et al., in Review; Anderson et al., 2020; Amora Noguera 2022
55	Emerald Lake California	Small lake and Pond	United States of America	36.5973	-118.676	11.0131	0.0242123	10	6.3	Mendonca et al., 2017	Ray et al., in Review; Anderson et al., 2020; Amora Noguera 2022
56	Emerald Lake Kenya	Small lake and Pond	Kenya	-0.152142	37.2945	37.3914	0.013	NA	NA	Anderson et al., 2020	Ray et al., in Review; Anderson et al., 2020; Amora Noguera 2022
57	Faniant	Small lake and Pond	Canada	48.1268	-71.2642	15.8411	0.032	NA	NA	Anderson et al., 2020	Ray et al., in Review; Anderson et al., 2020; Amora Noguera 2022
58	Fern	Small lake and Pond	United States of America	40.3367	-105.677	10.862	0.0285026	10.4	NA	Mendonca et al., 2017	Ray et al., in Review; Anderson et al., 2020; Amora Noguera 2022
59	Fort Vechten	Small lake and Pond	Netherlands	52.0565	5.16669	33.7	0.081	4	NA	Mendonca et al., 2017	Ray et al., in Review; Anderson et al., 2020; Amora Noguera 2022
60	Four Mile Ponds - Pond 10	Small lake and Pond	United States of America	39.611	-84.743	192.612	0.0271	2.5	1.5	Rogers et al., 2022	Ray et al., in Review; Anderson et al., 2020; Amora Noguera 2022
61	Four Mile Ponds - Pond 14	Small lake and Pond	United States of America	39.608	-84.7582	240.636	0.00915	3	1.5	Rogers et al., 2022	Ray et al., in Review; Anderson et al., 2020; Amora Noguera 2022
62	Four Mile Ponds - Pond 9	Small lake and Pond	United States of America	39.609	-84.7323	226.41	0.0384	2.5	1.5	Rogers et al., 2022	Ray et al., in Review; Anderson et al., 2020; Amora Noguera 2022
63	Frank	Small lake and Pond	Canada	49.178	-57.648	7.43621	0.02	NA	NA	Anderson et al., 2020	Ray et al., in Review; Anderson et al., 2020; Amora Noguera 2022
64	Fred Hollrah	Small lake and Pond	United States of America	42.0417	-96	6537	0.01	NA	NA	Downing et al., 2008	Ray et al., in Review; Anderson et al., 2020; Amora Noguera 2022	Agriculturally eutrophic
65	Friary Lough	Small lake and Pond	Germany	54.3	9.1	74.6	0.054	8.5	NA	Mendonca et al., 2017	Ray et al., in Review; Anderson et al., 2020; Amora Noguera 2022
66	Gäddtjärn	Small lake and Pond	Sweden	59.8592	15.1834	57	0.07	11	NA	Mendonca et al., 2017	Ray et al., in Review; Anderson et al., 2020; Amora Noguera 2022
67	Gasiorowskie	Small lake and Pond	Poland	53.7202	20.8147	111	0.069	3.5	NA	Skwierawski, 2022	Ray et al., in Review; Anderson et al., 2020; Amora Noguera 2022
68	Golden	Small lake and Pond	United States of America	46.8888	-121.9	6.458	0.0702946	23.9	10.4	Mendonca et al., 2017	Ray et al., in Review; Anderson et al., 2020; Amora Noguera 2022
69	Goldeneye	Small lake and Pond	United States of America	58.247	-135.833	12.6944	0.027	NA	NA	Anderson et al., 2020	Ray et al., in Review; Anderson et al., 2020; Amora Noguera 2022
70	Gollinsee	Small lake and Pond	Germany	53.0283	13.5882	196	0.033	2.9	1.7	Mendonca et al., 2017	Ray et al., in Review; Anderson et al., 2020; Amora Noguera 2022
71	Green Lake 4	Small lake and Pond	United States of America	40.0553	-105.619	8.97073	0.0413118	NA	NA	Mendonca et al., 2017	Ray et al., in Review; Anderson et al., 2020; Amora Noguera 2022
72	Green Lake 5	Small lake and Pond	United States of America	40.053	-105.63	6.36882	0.0436221	NA	NA	Mendonca et al., 2017	Ray et al., in Review; Anderson et al., 2020; Amora Noguera 2022
73	Hagelseewli	Small lake and Pond	Switzerland	46.6729	8.03551	14.1	0.03	18.5	NA	Mendonca et al., 2017	Ray et al., in Review; Anderson et al., 2020; Amora Noguera 2022
74	Hausberg	Small lake and Pond	Kenya	-0.144023	37.3005	11.0436	0.01	NA	NA	Anderson et al., 2020	Ray et al., in Review; Anderson et al., 2020; Amora Noguera 2022
75	Heron	Small lake and Pond	Ireland	54.254	-7.081	133.136	0.06	12	NA	Anderson et al., 2020	Ray et al., in Review; Anderson et al., 2020; Amora Noguera 2022
76	Hir Hir1	Small lake and Pond	United Kingdom	52.292	-3.7769	10.473	0.05	NA	NA	Anderson et al., 2020	Ray et al., in Review; Anderson et al., 2020; Amora Noguera 2022
77	Hjermstad Lake	Small lake and Pond	United States of America	44.1748	-96.0043	147.263	0.02	0.9	NA	Anderson et al., 2020	Ray et al., in Review; Anderson et al., 2020; Amora Noguera 2022
78	Hobbs Lake	Small lake and Pond	United States of America	43.0333	-109.671	13.1921	0.0689744	NA	NA	Mendonca et al., 2017	Ray et al., in Review; Anderson et al., 2020; Amora Noguera 2022
79	Hoh	Small lake and Pond	United States of America	47.8987	-123.786	6.83944	0.0743937	14.9	5.2	Mendonca et al., 2017	Ray et al., in Review; Anderson et al., 2020; Amora Noguera 2022
80	Honey Creek F-1	Small lake and Pond	United States of America	41.0333	-93.325	1640	0.034	NA	NA	Downing et al., 2008	Ray et al., in Review; Anderson et al., 2020; Amora Noguera 2022	Agriculturally eutrophic
81	Hoover	Small lake and Pond	United States of America	40.671	-110.83	3.1	0.078	NA	7.9	Munroe and Bencher, 2019	Ray et al., in Review; Anderson et al., 2020; Amora Noguera 2022
82	Indianhead Lake	Small lake and Pond	United States of America	44.8802	-93.3867	62.5313	0.05	NA	NA	Anderson et al., 2020	Ray et al., in Review; Anderson et al., 2020; Amora Noguera 2022
83	Jacaretinga Lake	Small lake and Pond	Brazil	-3.4814	-62.9242	44	0.05	NA	NA	Mendonca et al., 2017	Ray et al., in Review; Anderson et al., 2020; Amora Noguera 2022
84	Jones Creek Reservoir	Small lake and Pond	United States of America	41.6833	-95.8167	3093	0.078	NA	NA	Downing et al., 2008	Ray et al., in Review; Anderson et al., 2020; Amora Noguera 2022	Agriculturally eutrophic
85	Kermsuh	Small lake and Pond	United States of America	40.748	-110.831	4.15	0.039	NA	5.2	Munroe and Bencher, 2019	Ray et al., in Review; Anderson et al., 2020; Amora Noguera 2022
86	Khanymey - Lake 1	Small lake and Pond	Russia	63.785	75.644	36.2	0.0027	NA	0.45	Manasypov et al., 2022	Ray et al., in Review; Anderson et al., 2020; Amora Noguera 2022
87	Kogalym - Lake 14	Small lake and Pond	Russia	62.259	74.191	44.9	0.0082	NA	0.65	Manasypov et al., 2022	Ray et al., in Review; Anderson et al., 2020; Amora Noguera 2022
88	Korte Loef pond	Small lake and Pond	Netherlands	51.775	5.85306	89.9	0.004635	NA	NA	Mendonca et al., 2017	Ray et al., in Review; Anderson et al., 2020; Amora Noguera 2022
89	L11	Small lake and Pond	Sweden	68.3485	19.0226	18	0.0104	1	0.4	Lundin 2015 (from Amora Noguera 2022)	Ray et al., in Review; Anderson et al., 2020; Amora Noguera 2022
90	L14	Small lake and Pond	Sweden	68.3551	19.0341	18	0.0061	2.5	1.3	Lundin 2015 (from Amora Noguera 2022)	Ray et al., in Review; Anderson et al., 2020; Amora Noguera 2022
91	L24	Small lake and Pond	Sweden	68.3476	19.0371	5	0.0201	2.5	1.3	Lundin 2015 (from Amora Noguera 2022)	Ray et al., in Review; Anderson et al., 2020; Amora Noguera 2022
92	L4	Small lake and Pond	Sweden	68.36	19.0486	25	0.0111	3.5	1.1	Lundin 2015 (from Amora Noguera 2022)	Ray et al., in Review; Anderson et al., 2020; Amora Noguera 2022
93	L9	Small lake and Pond	Sweden	68.3507	18.9688	11	0.0573	4.5	1.9	Lundin 2015 (from Amora Noguera 2022)	Ray et al., in Review; Anderson et al., 2020; Amora Noguera 2022
94	La Luna	Small lake and Pond	Mexico	19.1071	-99.7524	30	0.03	10	5	Alcocer et al., 2020	Ray et al., in Review; Anderson et al., 2020; Amora Noguera 2022
95	Lac 2	Small lake and Pond	Canada	52.1322	-75.8192	13.7198	0.05	NA	NA	Anderson et al., 2020	Ray et al., in Review; Anderson et al., 2020; Amora Noguera 2022
96	Lac 66	Small lake and Pond	Canada	51.96	-76.0097	22.969	0.08	NA	NA	Anderson et al., 2020	Ray et al., in Review; Anderson et al., 2020; Amora Noguera 2022
97	Lac Noir NOIR 93/1	Small lake and Pond	France	45.4214	7.12497	6.79778	0.012	NA	NA	Anderson et al., 2020	Ray et al., in Review; Anderson et al., 2020; Amora Noguera 2022
98	Laguna Escura ESCU 93/2	Small lake and Pond	Portugal	40.3554	-7.63694	18.8466	0.02	NA	NA	Anderson et al., 2020	Ray et al., in Review; Anderson et al., 2020; Amora Noguera 2022
99	Lake Ammerzoden	Small lake and Pond	Netherlands	51.7427	5.23491	296.1	0.0165	4.4	NA	Mendonca et al., 2017	Ray et al., in Review; Anderson et al., 2020; Amora Noguera 2022
100	Lake Elbert	Small lake and Pond	United States of America	40.6347	-106.707	7.02519	0.0464454	NA	NA	Mendonca et al., 2017	Ray et al., in Review; Anderson et al., 2020; Amora Noguera 2022
101	Lake Hadley	Small lake and Pond	United States of America	44.9861	-93.5145	284.556	0.089	NA	NA	Anderson et al., 2020	Ray et al., in Review; Anderson et al., 2020; Amora Noguera 2022
102	Lake Logung (Legung)	Small lake and Pond	Indonesia	-8.04222	113.307	256.156	0.082	NA	NA	Anderson et al., 2020	Ray et al., in Review; Anderson et al., 2020; Amora Noguera 2022
103	Levi Pond	Small lake and Pond	United States of America	44.2671	-72.2275	17.82	0.088	NA	NA	Anderson et al., 2020	Ray et al., in Review; Anderson et al., 2020; Amora Noguera 2022
104	Little	Small lake and Pond	United States of America	48.3334	-93.0964	21.655	0.075	NA	NA	Anderson et al., 2020	Ray et al., in Review; Anderson et al., 2020; Amora Noguera 2022
105	Little Superior Lake	Small lake and Pond	United States of America	40.733	-110.474	6.42	0.06	NA	9.5	Munroe and Bencher, 2019	Ray et al., in Review; Anderson et al., 2020; Amora Noguera 2022
106	Loch nan Gad	Small lake and Pond	United Kingdom	55.757	-5.5335	43.752	0.098	1.7	NA	Anderson et al., 2020	Ray et al., in Review; Anderson et al., 2020; Amora Noguera 2022
107	Lone Pine	Small lake and Pond	United States of America	40.2324	-105.732	11.5407	0.0476386	9.7	2.6	Mendonca et al., 2017	Ray et al., in Review; Anderson et al., 2020; Amora Noguera 2022
108	Lower Sand Creek Lake	Small lake and Pond	United States of America	37.9298	-105.532	2.67519	0.0813756	NA	NA	Anderson et al., 2020	Ray et al., in Review; Anderson et al., 2020; Amora Noguera 2022
109	LP19	Small lake and Pond	United States of America	46.8228	-121.895	12.9386	0.0173876	12.1	5.4	Mendonca et al., 2017	Ray et al., in Review; Anderson et al., 2020; Amora Noguera 2022
110	Luce	Small lake and Pond	United States of America	44.9648	-93.7811	55	0.0697115	2	NA	Mendonca et al., 2017	Ray et al., in Review; Anderson et al., 2020; Amora Noguera 2022
111	Marcott Lake	Small lake and Pond	United States of America	44.8207	-93.074	189.309	0.047	NA	NA	Anderson et al., 2020	Ray et al., in Review; Anderson et al., 2020; Amora Noguera 2022
112	Margaret Lake Minnesota CL	Small lake and Pond	United States of America	46.8519	-93.9846	96.5423	0.068	NA	NA	Anderson et al., 2020	Ray et al., in Review; Anderson et al., 2020; Amora Noguera 2022
113	Marshall	Small lake and Pond	United States of America	40.676	-110.874	3.49	0.08	NA	10.7	Munroe and Bencher, 2019	Ray et al., in Review; Anderson et al., 2020; Amora Noguera 2022
114	mature ponds - Druridge Bay	Small lake and Pond	United Kingdom	55.26	-1.57	122	1e-06	0.3	0.3	Taylor et al., 2019	Ray et al., in Review; Anderson et al., 2020; Amora Noguera 2022
115	Mavis Lake	Small lake and Pond	United States of America	48.0607	-90.8374	178.16	0.035	NA	NA	Anderson et al., 2020	Ray et al., in Review; Anderson et al., 2020; Amora Noguera 2022
116	Mavis West	Small lake and Pond	United States of America	46.2637	-96.0516	68	0.0893608	4.3	NA	Mendonca et al., 2017	Ray et al., in Review; Anderson et al., 2020; Amora Noguera 2022
117	Max Miller 5	Small lake and Pond	United States of America	41.3333	-95.575	5593	0.013	NA	NA	Downing et al., 2008	Ray et al., in Review; Anderson et al., 2020; Amora Noguera 2022	Agriculturally eutrophic
118	Middle Portage	Small lake and Pond	United States of America	46.7011	-92.6815	53.5814	0.03	NA	NA	Anderson et al., 2020	Ray et al., in Review; Anderson et al., 2020; Amora Noguera 2022
119	Mills	Small lake and Pond	United States of America	40.2894	-105.642	25.6131	0.0579198	9	1.3	Mendonca et al., 2017	Ray et al., in Review; Anderson et al., 2020; Amora Noguera 2022
120	Monk Myre	Small lake and Pond	United Kingdom	56.5698	-3.288	171.455	0.049	3.7	1.5	Anderson et al., 2020	Ray et al., in Review; Anderson et al., 2020; Amora Noguera 2022
121	Mud Lake	Small lake and Pond	United States of America	46.2006	-94.4452	17.7666	0.064	NA	NA	Anderson et al., 2020	Ray et al., in Review; Anderson et al., 2020; Amora Noguera 2022
122	Mudd Pond	Small lake and Pond	United States of America	42.4136	-76.7874	257.4	0.005	2.7	NA	Holgerson et al.,	Ray et al., in Review; Anderson et al., 2020; Amora Noguera 2022
123	Muskrat Lake	Small lake and Pond	United States of America	46.1925	-94.457	54.4992	0.07	NA	NA	Anderson et al., 2020	Ray et al., in Review; Anderson et al., 2020; Amora Noguera 2022
124	Navajo Lake	Small lake and Pond	United States of America	37.8474	-108.027	8.8745	0.0342474	NA	NA	Mendonca et al., 2017	Ray et al., in Review; Anderson et al., 2020; Amora Noguera 2022
125	new ponds - Druridge Bay	Small lake and Pond	United Kingdom	55.26	-1.57	14	1e-06	0.3	0.3	Taylor et al., 2019	Ray et al., in Review; Anderson et al., 2020; Amora Noguera 2022
126	Nizne Terienske Pleso TERI 93/2	Small lake and Pond	Slovakia	49.17	20.0126	6.95831	0.053	NA	NA	Anderson et al., 2020	Ray et al., in Review; Anderson et al., 2020; Amora Noguera 2022
127	Noname	Small lake and Pond	United States of America	48.4789	-113.447	10.7497	0.042	5.5	NA	Mendonca et al., 2017	Ray et al., in Review; Anderson et al., 2020; Amora Noguera 2022
128	North Star	Small lake and Pond	United States of America	40.754	-110.452	3.45	0.058	NA	5.8	Munroe and Bencher, 2019	Ray et al., in Review; Anderson et al., 2020; Amora Noguera 2022
129	Oblong	Small lake and Pond	Kenya	-0.145132	37.3018	15.0314	0.016	NA	NA	Anderson et al., 2020	Ray et al., in Review; Anderson et al., 2020; Amora Noguera 2022
130	Ostler	Small lake and Pond	United States of America	40.762	-110.778	4.2	0.053	NA	5.2	Munroe and Bencher, 2019	Ray et al., in Review; Anderson et al., 2020; Amora Noguera 2022
131	PA2 (Tapari)	Small lake and Pond	Brazil	-2.44364	-54.9002	35.1587	0.051	NA	NA	Amora-Nogueira et al., 2022	Ray et al., in Review; Anderson et al., 2020; Amora Noguera 2022
132	Pear	Small lake and Pond	United States of America	36.6012	-118.668	8.08535	0.0701438	27	7.9	Mendonca et al., 2017	Ray et al., in Review; Anderson et al., 2020; Amora Noguera 2022
133	PJ Lake	Small lake and Pond	United States of America	47.9463	-123.415	58.6	0.00676346	6.4	2.5	Mendonca et al., 2017	Ray et al., in Review; Anderson et al., 2020; Amora Noguera 2022
134	Planina pri Jezeru	Small lake and Pond	Slovenia	46.311	13.832	44.4354	0.02	10	NA	Anderson et al., 2020	Ray et al., in Review; Anderson et al., 2020; Amora Noguera 2022
135	Pond 14	Small lake and Pond	United States of America	27.43	-82.39	21.8	0.00622	NA	7.2	Goeckner et al., 2022	Ray et al., in Review; Anderson et al., 2020; Amora Noguera 2022
136	Pond 15	Small lake and Pond	United States of America	27.43	-82.4	61.9	0.00885	NA	4.7	Goeckner et al., 2022	Ray et al., in Review; Anderson et al., 2020; Amora Noguera 2022
137	Pond 18	Small lake and Pond	United States of America	27.42	-82.41	126	0.0188	NA	5.6	Goeckner et al., 2022	Ray et al., in Review; Anderson et al., 2020; Amora Noguera 2022
138	Pond 23	Small lake and Pond	United States of America	27.43	-82.42	141	0.0079	NA	3.4	Goeckner et al., 2022	Ray et al., in Review; Anderson et al., 2020; Amora Noguera 2022
139	Pond 34	Small lake and Pond	United States of America	27.43	-82.44	217	0.0131	NA	1.8	Goeckner et al., 2022	Ray et al., in Review; Anderson et al., 2020; Amora Noguera 2022
140	Preble	Small lake and Pond	United States of America	39.77	-84.68	46.7318	0.001	3.5	NA	Mendonca et al., 2017	Ray et al., in Review; Anderson et al., 2020; Amora Noguera 2022
141	Pristine Lake	Small lake and Pond	United States of America	40.6893	-106.685	3.68958	0.0270814	NA	NA	Mendonca et al., 2017	Ray et al., in Review; Anderson et al., 2020; Amora Noguera 2022
142	Pyramid	Small lake and Pond	United States of America	40.653	-110.9	5.36	0.058	NA	10.7	Munroe and Bencher, 2019	Ray et al., in Review; Anderson et al., 2020; Amora Noguera 2022
143	Ranu Lading	Small lake and Pond	Indonesia	-8.00898	113.313	170.578	0.03	NA	NA	Anderson et al., 2020	Ray et al., in Review; Anderson et al., 2020; Amora Noguera 2022
144	Reader	Small lake and Pond	United States of America	40.791	-110.06	5.28	0.048	NA	4	Munroe and Bencher, 2019	Ray et al., in Review; Anderson et al., 2020; Amora Noguera 2022
145	Rectangle	Small lake and Pond	United States of America	58.237	-135.877	10.145	0.033	NA	NA	Anderson et al., 2020	Ray et al., in Review; Anderson et al., 2020; Amora Noguera 2022
146	Ryder	Small lake and Pond	United States of America	40.725	-110.828	9.29	0.086	NA	17.4	Munroe and Bencher, 2019	Ray et al., in Review; Anderson et al., 2020; Amora Noguera 2022
147	Sant Catarina	Small lake and Pond	Brazil	-8.26256	-63.1828	137.183	0.012	10	NA	Anderson et al., 2020	Ray et al., in Review; Anderson et al., 2020; Amora Noguera 2022
148	Sapsucker	Small lake and Pond	United States of America	58.233	-135.823	10.6815	0.027	NA	NA	Anderson et al., 2020	Ray et al., in Review; Anderson et al., 2020; Amora Noguera 2022
149	Schulze Lake	Small lake and Pond	United States of America	44.7848	-93.1287	52.0299	0.05	NA	NA	Anderson et al., 2020	Ray et al., in Review; Anderson et al., 2020; Amora Noguera 2022
150	Scoat Tarn	Small lake and Pond	United Kingdom	54.482	-3.299	14.9973	0.046	NA	NA	Anderson et al., 2020	Ray et al., in Review; Anderson et al., 2020; Amora Noguera 2022
151	Setal Pond	Small lake and Pond	Poland	53.9039	20.4825	239	0.037	1.6	NA	Skwierawski, 2022	Ray et al., in Review; Anderson et al., 2020; Amora Noguera 2022
152	Shoe Factory Road Pond	Small lake and Pond	United States of America	42.0506	-88.1997	67.861	0.00255662	NA	NA	Mendonca et al., 2017	Ray et al., in Review; Anderson et al., 2020; Amora Noguera 2022
153	Shulzensee	Small lake and Pond	Germany	53.247	13.2747	53	0.039	4.2	2.2	Mendonca et al., 2017	Ray et al., in Review; Anderson et al., 2020; Amora Noguera 2022
154	Silver Lake Minnesota TL	Small lake and Pond	United States of America	47.4467	-92.3735	199.613	0.05	NA	NA	Anderson et al., 2020	Ray et al., in Review; Anderson et al., 2020; Amora Noguera 2022
155	Slotsye Lake	Small lake and Pond	United States of America	46.0642	-95.8451	83.5545	0.091	3.8	NA	Anderson et al., 2020	Ray et al., in Review; Anderson et al., 2020; Amora Noguera 2022
156	Snyder Lake	Small lake and Pond	United States of America	48.6267	-113.803	17.0079	0.0241459	3.5	1.5	Mendonca et al., 2017	Ray et al., in Review; Anderson et al., 2020; Amora Noguera 2022
157	Spider	Small lake and Pond	United States of America	40.7	-110.479	8.34	0.081	NA	12.8	Munroe and Bencher, 2019	Ray et al., in Review; Anderson et al., 2020; Amora Noguera 2022
158	Spring Lake Minnesota B	Small lake and Pond	United States of America	47.5148	-93.4614	38.19	0.085	NA	NA	Mendonca et al., 2017	Ray et al., in Review; Anderson et al., 2020; Amora Noguera 2022
159	Springbrook Lake	Small lake and Pond	United States of America	41.776	-94.4666	1111	0.069	NA	NA	Downing et al., 2008	Ray et al., in Review; Anderson et al., 2020; Amora Noguera 2022	Agriculturally eutrophic
160	SS1341	Small lake and Pond	Greenland	66.99	-51.14	7.48	0.07	16	NA	Anderson et al., 2019	Ray et al., in Review; Anderson et al., 2020; Amora Noguera 2022
161	SS16	Small lake and Pond	Greenland	66.91	-50.46	7.42235	0.033	12.2	NA	Anderson et al., 2019	Ray et al., in Review; Anderson et al., 2020; Amora Noguera 2022
162	SS53	Small lake and Pond	Greenland	66.49	-53.53	5.494	0.073	8.3	NA	Anderson et al., 2019	Ray et al., in Review; Anderson et al., 2020; Amora Noguera 2022
163	SS86	Small lake and Pond	Greenland	66.96	-49.81	2.19641	0.05	13	NA	Anderson et al., 2019	Ray et al., in Review; Anderson et al., 2020; Amora Noguera 2022
164	Starolesnienske Pleso STAR 93/2	Small lake and Pond	Slovakia	49.18	20.1665	14.4669	0.007	NA	NA	Anderson et al., 2020	Ray et al., in Review; Anderson et al., 2020; Amora Noguera 2022
165	STOW91	Small lake and Pond	United Kingdom	52.026	-1.019	108.346	0.033	3	NA	Anderson et al., 2020	Ray et al., in Review; Anderson et al., 2020; Amora Noguera 2022
166	Strimple	Small lake and Pond	United States of America	39.2463	-84.7296	802.044	0.02	2.5	NA	Mendonca et al., 2017	Ray et al., in Review; Anderson et al., 2020; Amora Noguera 2022
167	Supply ERC	Small lake and Pond	United States of America	39.5285	-84.7235	49.91	0.003	2.5	NA	Mendonca et al., 2017	Ray et al., in Review; Anderson et al., 2020; Amora Noguera 2022
168	Svarttjärn	Small lake and Pond	Sweden	59.8906	15.2577	14	0.007	6	NA	Mendonca et al., 2017	Ray et al., in Review; Anderson et al., 2020; Amora Noguera 2022
169	Taylor	Small lake and Pond	United States of America	40.787	-110.092	3.76	0.09	NA	11	Munroe and Bencher, 2019	Ray et al., in Review; Anderson et al., 2020; Amora Noguera 2022
170	Tazovsky - Lake 9	Small lake and Pond	Russia	67.357	78.702	248.8	0.0518	NA	0.65	Manasypov et al., 2022	Ray et al., in Review; Anderson et al., 2020; Amora Noguera 2022
171	Teanga TEAN5	Small lake and Pond	United Kingdom	57.323	-7.288	21.7899	0.076	NA	NA	Anderson et al., 2020	Ray et al., in Review; Anderson et al., 2020; Amora Noguera 2022
172	Texas Hollow	Small lake and Pond	United States of America	42.5467	-76.2664	221.8	0.0067	4	NA	Holgerson et al.,	Ray et al., in Review; Anderson et al., 2020; Amora Noguera 2022
173	Theobold C	Small lake and Pond	United States of America	42.3833	-96.075	1635	0.041	NA	NA	Downing et al., 2008	Ray et al., in Review; Anderson et al., 2020; Amora Noguera 2022	Agriculturally eutrophic
174	Third Lake	Small lake and Pond	United States of America	46.7116	-92.5026	60.8257	0.047	NA	NA	Anderson et al., 2020	Ray et al., in Review; Anderson et al., 2020; Amora Noguera 2022
175	Tiewake	Small lake and Pond	China	48.49	87	1	0.02	NA	NA	Wang et al., 2018	Ray et al., in Review; Anderson et al., 2020; Amora Noguera 2022
176	Tomtit	Small lake and Pond	Canada	49.172	-57.79	9.91089	0.022	NA	NA	Anderson et al., 2020	Ray et al., in Review; Anderson et al., 2020; Amora Noguera 2022
177	Tracy North	Small lake and Pond	United States of America	42.0333	-95.375	2122	0.018	NA	NA	Downing et al., 2008	Ray et al., in Review; Anderson et al., 2020; Amora Noguera 2022	Agriculturally eutrophic
178	Twin Lake	Small lake and Pond	United States of America	44.9911	-93.3366	129.984	0.073	NA	NA	Anderson et al., 2020	Ray et al., in Review; Anderson et al., 2020; Amora Noguera 2022
179	Upper Kitranda	Small lake and Pond	Uganda	0.35285	29.8874	12.1436	0.04	NA	NA	Anderson et al., 2020	Ray et al., in Review; Anderson et al., 2020; Amora Noguera 2022
180	Upper Lily Pad	Small lake and Pond	United States of America	40.628	-110.266	8.07	0.04	NA	9.8	Munroe and Bencher, 2019	Ray et al., in Review; Anderson et al., 2020; Amora Noguera 2022
181	Upton Broad	Small lake and Pond	United Kingdom	52.666	1.533	83.9758	0.07	1.6	NA	Anderson et al., 2020	Ray et al., in Review; Anderson et al., 2020; Amora Noguera 2022
182	Wakefield Lake	Small lake and Pond	United States of America	44.9951	-93.0352	135.142	0.082	NA	NA	Anderson et al., 2020	Ray et al., in Review; Anderson et al., 2020; Amora Noguera 2022
183	Wallace	Small lake and Pond	United States of America	48.0571	-88.6279	47	0.05	3	NA	Anderson et al., 2020	Ray et al., in Review; Anderson et al., 2020; Amora Noguera 2022
184	Wandakara	Small lake and Pond	Uganda	0.416718	30.2707	140.7	0.04	12	NA	Anderson et al., 2020	Ray et al., in Review; Anderson et al., 2020; Amora Noguera 2022
185	West Twin Pond	Small lake and Pond	United States of America	46.7784	-92.1242	66.9663	0.006	NA	NA	Anderson et al., 2020	Ray et al., in Review; Anderson et al., 2020; Amora Noguera 2022
186	White Loch	Small lake and Pond	United Kingdom	55.7404	-4.40861	242.497	0.049	11	NA	Anderson et al., 2020	Ray et al., in Review; Anderson et al., 2020; Amora Noguera 2022
187	Wilbur Meyer	Small lake and Pond	United States of America	42.0333	-95.375	5647	0.01	NA	NA	Downing et al., 2008	Ray et al., in Review; Anderson et al., 2020; Amora Noguera 2022	Agriculturally eutrophic
188	William Esbeck	Small lake and Pond	United States of America	41.6833	-94.8917	4201	0.01	NA	NA	Downing et al., 2008	Ray et al., in Review; Anderson et al., 2020; Amora Noguera 2022	Agriculturally eutrophic
189	Worth County	Small lake and Pond	United States of America	40.4025	-94.5248	279	0.07	NA	NA	Mendonca et al., 2017	Ray et al., in Review; Anderson et al., 2020; Amora Noguera 2022
190	Ypsilon	Small lake and Pond	United States of America	40.4439	-105.664	8.47186	0.0307665	15.8	NA	Mendonca et al., 2017	Ray et al., in Review; Anderson et al., 2020; Amora Noguera 2022
191	Yunzhonghu	Small lake and Pond	China	29.404	114.67	19	0.06	35	NA	Wang et al., 2018	Ray et al., in Review; Anderson et al., 2020; Amora Noguera 2022
192	Zhunaogeqi	Small lake and Pond	China	39.21	102.16	5	0.039	NA	NA	Wang et al., 2018	Ray et al., in Review; Anderson et al., 2020; Amora Noguera 2022

## Sheet: lake
No	Name	Ecosystem_type	Country	Lat	Lon	Carbon_gCm2yr	Area_km2	Max_depth_m	Mean_depth_m	Reference	Source
1	1st Crow Wing Lake	Lake	United States of America	46.8388	-94.8405	158.936	2.021	NA	NA	Anderson et al., 2020	Ray et al., in Review; Anderson et al., 2020; Amora Noguera 2022
2	Adam Tarn, FILP3	Lake	Falkland Is.	-51.5756	-60.0718	3.85339	6.3	16	NA	Anderson et al., 2020	Ray et al., in Review; Anderson et al., 2020; Amora Noguera 2022
3	Agnes	Lake	United States of America	47.528	-92.8116	18.7279	0.12	NA	NA	Anderson et al., 2020	Ray et al., in Review; Anderson et al., 2020; Amora Noguera 2022
4	Agua Preta de Baixo	Lake	Brazil	-18.0065	-41.2258	21.78	0.5	1.5	NA	Turcq et al., 2002	Ray et al., in Review; Anderson et al., 2020; Amora Noguera 2022
5	Aibi	Lake	China	44.89	82.96	1	1070	3	1	Wang et al., 2018	Ray et al., in Review; Anderson et al., 2020; Amora Noguera 2022
6	Airag	Lake	Mongolia	48.9088	93.3706	36.4145	18022	10	5.7	Anderson et al., 2020	Ray et al., in Review; Anderson et al., 2020; Amora Noguera 2022
7	Ajudante	Lake	Brazil	-1.44987	-56.3912	73.37	4.7	NA	NA	Anderson et al., 2020	Ray et al., in Review; Anderson et al., 2020; Amora Noguera 2022
8	ALB05	Lake	Canada	56.2223	-111.17	26.0512	186.1	3.1	NA	Anderson et al., 2020	Ray et al., in Review; Anderson et al., 2020; Amora Noguera 2022
9	ALB12b	Lake	Canada	56.2455	-113.141	67.5408	75.5	1.8	NA	Anderson et al., 2020	Ray et al., in Review; Anderson et al., 2020; Amora Noguera 2022
10	ALB15b	Lake	Canada	59.1191	-115.128	20.3333	955	6	NA	Anderson et al., 2020	Ray et al., in Review; Anderson et al., 2020; Amora Noguera 2022
11	ALB16b	Lake	Canada	59.238	-114.524	17.5461	55.2	1.5	NA	Anderson et al., 2020	Ray et al., in Review; Anderson et al., 2020; Amora Noguera 2022
12	ALB21b	Lake	Canada	57.1467	-110.865	33.9616	11.2	2	NA	Anderson et al., 2020	Ray et al., in Review; Anderson et al., 2020; Amora Noguera 2022
13	Albufera des Grau	Lake	Spain	39.9477	4.25314	72	0.78	3	1.37	Mendonca et al., 2017	Ray et al., in Review; Anderson et al., 2020; Amora Noguera 2022
14	Alexandria	Lake	Greenland	-35.4922	139.076	9.65	649	6	2.8	Barnett 1994 (from Amora Noguera 2022)	Ray et al., in Review; Anderson et al., 2020; Amora Noguera 2022
15	Allen	Lake	Ireland	54.05	-8.05	102.355	35	30	NA	Anderson et al., 2020	Ray et al., in Review; Anderson et al., 2020; Amora Noguera 2022
16	Alton	Lake	United States of America	47.8631	-90.9083	21.7316	3.86	NA	NA	Anderson et al., 2020	Ray et al., in Review; Anderson et al., 2020; Amora Noguera 2022
17	Amuta Lake	Lake	China	46.5732	124.047	20.02	61.8	NA	4.2	Bao et al., 2021	Ray et al., in Review; Anderson et al., 2020; Amora Noguera 2022
18	Araca	Lake	Brazil	-8.46986	-63.506	542.258	0.445	NA	NA	Anderson et al., 2020	Ray et al., in Review; Anderson et al., 2020; Amora Noguera 2022
19	Arbutus	Lake	United States of America	43.9914	-74.2452	35.0612	0.490362	NA	NA	Mendonca et al., 2017	Ray et al., in Review; Anderson et al., 2020; Amora Noguera 2022
20	Argent	Lake	Canada	45.3088	-72.3165	52.8385	1.012	NA	NA	Anderson et al., 2020	Ray et al., in Review; Anderson et al., 2020; Amora Noguera 2022
22	Arresjoen ARSJ 93/4	Lake	Norway	79.67	10.8	2.22666	0.331	NA	NA	Anderson et al., 2020	Ray et al., in Review; Anderson et al., 2020; Amora Noguera 2022
23	Arrowhead_BT	Lake	United States of America	45.0323	-109.606	6.70878	9.9	1.5	1.2	Anderson et al., 2020	Ray et al., in Review; Anderson et al., 2020; Amora Noguera 2022
24	Astrid	Lake	United States of America	48.1107	-92.3289	34.0169	0.476	NA	NA	Anderson et al., 2020	Ray et al., in Review; Anderson et al., 2020; Amora Noguera 2022
25	AT1	Lake	Greenland	66.58	-53.24	1.41	0.11	16.5	NA	Anderson et al., 2019	Ray et al., in Review; Anderson et al., 2020; Amora Noguera 2022
26	AT6	Lake	Greenland	66.97	-53.49	2.19	0.111	23	NA	Anderson et al., 2019	Ray et al., in Review; Anderson et al., 2020; Amora Noguera 2022
27	August	Lake	United States of America	47.7611	-91.6064	28.9468	0.86	5.8	NA	Anderson et al., 2020	Ray et al., in Review; Anderson et al., 2020; Amora Noguera 2022
32	Baikal	Lake	Russia	52.7137	106.527	2.764	31494	678	NA	Mendonca et al., 2017	Ray et al., in Review; Anderson et al., 2020; Amora Noguera 2022
33	Baiyangdian	Lake	China	38.88	116.03	6	363	NA	2	Wang et al., 2018	Ray et al., in Review; Anderson et al., 2020; Amora Noguera 2022
34	Baldeggersee	Lake	Switzerland	47.2	8.266	35.1	5.22	66	NA	Mendonca et al., 2017	Ray et al., in Review; Anderson et al., 2020; Amora Noguera 2022
35	Balkhash Lake	Lake	Kazakhstan	46.2474	74.51	20.5	18200	26.5	5.8	Liu et al., 2021	Ray et al., in Review; Anderson et al., 2020; Amora Noguera 2022
36	Bangou Kirey	Lake	Niger	13.5084	2.22639	104	60	5.3	NA	Mendonca et al., 2017	Ray et al., in Review; Anderson et al., 2020; Amora Noguera 2022
37	Barrett Lake	Lake	United States of America	45.9163	-95.8782	175.391	2.125	NA	NA	Anderson et al., 2020	Ray et al., in Review; Anderson et al., 2020; Amora Noguera 2022
38	Barton Broad	Lake	United Kingdom	52.739	1.495	150.816	0.77	1.5	NA	Anderson et al., 2020	Ray et al., in Review; Anderson et al., 2020; Amora Noguera 2022
39	Bass	Lake	United States of America	43.8181	-94.0787	153.483	0.79	7.9	NA	Anderson et al., 2020	Ray et al., in Review; Anderson et al., 2020; Amora Noguera 2022
40	Bass 1	Lake	United States of America	44.9224	-85.8832	169.586	0.378	8.5	NA	Anderson et al., 2020	Ray et al., in Review; Anderson et al., 2020; Amora Noguera 2022
41	Bassenthwaite Lake	Lake	United Kingdom	54.653	-3.216	54.6639	5.28	21	NA	Anderson et al., 2020	Ray et al., in Review; Anderson et al., 2020; Amora Noguera 2022
42	Batata	Lake	Brazil	-1.53085	-56.3054	59.52	25	NA	NA	Mendonca et al., 2017	Ray et al., in Review; Anderson et al., 2020; Amora Noguera 2022
43	Battle Creek Lake	Lake	United States of America	44.9443	-92.9727	127.112	0.402	NA	NA	Anderson et al., 2020	Ray et al., in Review; Anderson et al., 2020; Amora Noguera 2022
44	Bean Lake	Lake	United States of America	47.3089	-91.3007	44.7691	0.117	NA	NA	Anderson et al., 2020	Ray et al., in Review; Anderson et al., 2020; Amora Noguera 2022
45	Bean Lake 2	Lake	United States of America	44.0718	-95.3744	119.675	0.643	NA	NA	Anderson et al., 2020	Ray et al., in Review; Anderson et al., 2020; Amora Noguera 2022
46	Bear	Lake	United States of America	47.2847	-91.3443	16.4847	0.172	NA	NA	Anderson et al., 2020	Ray et al., in Review; Anderson et al., 2020; Amora Noguera 2022
47	Beauclair	Lake	United States of America	28.8	-81.7	174	4.4	NA	1.7	Waters et al., 2019	Ray et al., in Review; Anderson et al., 2020; Amora Noguera 2022
48	Beauty_BT	Lake	United States of America	45.1057	-109.971	9.35431	36.4	35.1	NA	Anderson et al., 2020	Ray et al., in Review; Anderson et al., 2020; Amora Noguera 2022
49	Beaver Ellendale	Lake	United States of America	43.8902	-93.347	179.356	0.385	8.2	NA	Anderson et al., 2020	Ray et al., in Review; Anderson et al., 2020; Amora Noguera 2022
50	Beaver Lake	Lake	United States of America	46.5652	-86.3436	43.4523	3.106	9.2	NA	Anderson et al., 2020	Ray et al., in Review; Anderson et al., 2020; Amora Noguera 2022
51	Becharof	Lake	United States of America	57.9522	-156.377	1.5	1170	181	NA	Mendonca et al., 2017	Ray et al., in Review; Anderson et al., 2020; Amora Noguera 2022
52	Bellows	Lake	United States of America	28	-82.4	133	0.4	NA	1.7	Waters et al., 2019	Ray et al., in Review; Anderson et al., 2020; Amora Noguera 2022
53	Beysehir	Lake	Turkey	37.7505	31.5136	20.7657	671.609	9	NA	Anderson et al., 2020	Ray et al., in Review; Anderson et al., 2020; Amora Noguera 2022
55	Big Carnelian Lake	Lake	United States of America	45.1316	-92.8103	48.1381	1.813	NA	NA	Anderson et al., 2020	Ray et al., in Review; Anderson et al., 2020; Amora Noguera 2022
56	Big Elk Lake	Lake	United States of America	45.4726	-93.9462	99.3307	1.418	NA	NA	Anderson et al., 2020	Ray et al., in Review; Anderson et al., 2020; Amora Noguera 2022
57	Big Lake	Lake	United States of America	46.7055	-92.63	28.3856	2.08	NA	NA	Anderson et al., 2020	Ray et al., in Review; Anderson et al., 2020; Amora Noguera 2022
58	Big Marine Lake	Lake	United States of America	45.2135	-92.8681	111.163	6.429	NA	NA	Anderson et al., 2020	Ray et al., in Review; Anderson et al., 2020; Amora Noguera 2022
59	Big Sandy Lake	Lake	United States of America	46.7677	-93.2788	99.1063	24.2	NA	NA	Anderson et al., 2020	Ray et al., in Review; Anderson et al., 2020; Amora Noguera 2022
60	Big Trout	Lake	Canada	53.7213	-89.9426	11.112	654.99	39	NA	Anderson et al., 2020	Ray et al., in Review; Anderson et al., 2020; Amora Noguera 2022
61	Birch Lake	Lake	United States of America	47.7443	-91.8146	46.9525	28.4	NA	NA	Anderson et al., 2020	Ray et al., in Review; Anderson et al., 2020; Amora Noguera 2022
62	Biwa	Lake	Japan	35.3161	136.14	22.9167	674	103	41	Urabe et al., 20052022	Ray et al., in Review; Anderson et al., 2020; Amora Noguera 2022
54	Black Hawk Lake	Lake	United States of America	42.3001	-95.0196	32.3506	3.1	NA	NA	Anderson et al., 2020	Ray et al., in Review; Anderson et al., 2020; Amora Noguera 2022
63	Bogoria	Lake	Kenya	0.258135	36.0952	48.6455	39.301	9.25	NA	Anderson et al., 2020	Ray et al., in Review; Anderson et al., 2020; Amora Noguera 2022
64	Boomerang	Lake	Canada	53.6766	-124.516	9.98616	0.52	11	2.5	Anderson et al., 2020	Ray et al., in Review; Anderson et al., 2020; Amora Noguera 2022
65	Bosherston Lily Pond Centra	Lake	United Kingdom	51.617	-4.923	42.538	0.34	2	NA	Anderson et al., 2020	Ray et al., in Review; Anderson et al., 2020; Amora Noguera 2022
66	Bosten	Lake	China	41.97	86.99	0.4	992	17	8	Wang et al., 2018	Ray et al., in Review; Anderson et al., 2020; Amora Noguera 2022
67	Bousquet	Lake	Canada	48.0286	-71.4707	10.5816	0.503	NA	NA	Anderson et al., 2020	Ray et al., in Review; Anderson et al., 2020; Amora Noguera 2022
69	Brasileira	Lake	Brazil	-8.49545	-63.4874	103.18	0.51	NA	NA	Anderson et al., 2020	Ray et al., in Review; Anderson et al., 2020; Amora Noguera 2022
70	Brienz	Lake	Switzerland	46.7197	7.9752	21.5	29.8	115	NA	Mendonca et al., 2017	Ray et al., in Review; Anderson et al., 2020; Amora Noguera 2022
71	Broad Lough	Lake	United Kingdom	54.3	-7.5	144.021	109	69	NA	Anderson et al., 2020	Ray et al., in Review; Anderson et al., 2020; Amora Noguera 2022
72	Brompton	Lake	Canada	45.425	-72.1446	12.5772	11.471	NA	NA	Anderson et al., 2020	Ray et al., in Review; Anderson et al., 2020; Amora Noguera 2022
74	Brule	Lake	United States of America	47.9325	-90.6721	17.0017	17.4995	NA	NA	Anderson et al., 2020	Ray et al., in Review; Anderson et al., 2020; Amora Noguera 2022
75	Bryrup Langs¯	Lake	Denmark	56.0167	9.53333	72.7335	0.38	9	NA	Anderson et al., 2020	Ray et al., in Review; Anderson et al., 2020; Amora Noguera 2022
76	Buck Lake Minnesota	Lake	United States of America	47.5374	-93.1898	60.3723	1.993	NA	NA	Anderson et al., 2020	Ray et al., in Review; Anderson et al., 2020; Amora Noguera 2022
77	Buck Lake Wyoming	Lake	United States of America	44.9044	-110.125	73.0435	2.3	11.3	4.7	Anderson et al., 2020	Ray et al., in Review; Anderson et al., 2020; Amora Noguera 2022
78	Buffalo Lake Minnesota	Lake	United States of America	44.0764	-95.5793	119.321	0.619	2.7	NA	Anderson et al., 2020	Ray et al., in Review; Anderson et al., 2020; Amora Noguera 2022
79	Buffalo Lake Wyoming	Lake	United States of America	44.9346	-110.384	58.3418	4.3	5.4	3.4	Anderson et al., 2020	Ray et al., in Review; Anderson et al., 2020; Amora Noguera 2022
80	Bujuku	Lake	Uganda	0.376548	29.8934	47.8724	7.87	14.5	NA	Anderson et al., 2020	Ray et al., in Review; Anderson et al., 2020; Amora Noguera 2022
81	Buluntuohai	Lake	China	47.27	87.27	1	730	NA	8	Wang et al., 2018	Ray et al., in Review; Anderson et al., 2020; Amora Noguera 2022
73	Burt Lake	Lake	United States of America	43.5019	-94.3847	123.028	0.8	NA	NA	Anderson et al., 2020	Ray et al., in Review; Anderson et al., 2020; Amora Noguera 2022
82	Butterstone Loch	Lake	United Kingdom	56.587	-3.534	61.9775	0.43	7.5	NA	Anderson et al., 2020	Ray et al., in Review; Anderson et al., 2020; Amora Noguera 2022
83	Cantin	Lake	Canada	47.9761	-71.1566	12.1631	0.156	NA	NA	Anderson et al., 2020	Ray et al., in Review; Anderson et al., 2020; Amora Noguera 2022
84	Caohaizi	Lake	China	29.35	102	1	1	NA	1	Wang et al., 2018	Ray et al., in Review; Anderson et al., 2020; Amora Noguera 2022
85	Caracarana	Lake	Brazil	3.84	-59.78	8.09	0.6	5	NA	Turcq et al., 2002	Ray et al., in Review; Anderson et al., 2020; Amora Noguera 2022
86	Carajás	Lake	Brazil	-6.1125	-50.1883	21.3	0.12	NA	NA	Mendonca et al., 2017	Ray et al., in Review; Anderson et al., 2020; Amora Noguera 2022
87	Carajas N3	Lake	Brazil	-6.14	-58.19	10.07	0.12	0.7	NA	Turcq et al., 2002	Ray et al., in Review; Anderson et al., 2020; Amora Noguera 2022
88	Carlingwark Loch	Lake	United Kingdom	54.931	-3.932	448.238	0.4	5.5	NA	Anderson et al., 2020	Ray et al., in Review; Anderson et al., 2020; Amora Noguera 2022
89	Carlton	Lake	United States of America	27.7129	-82.2406	114.074	0.13675	NA	NA	Mendonca et al., 2017	Ray et al., in Review; Anderson et al., 2020; Amora Noguera 2022
90	Carver Lake	Lake	United States of America	44.9054	-92.9808	198.912	0.19	NA	NA	Anderson et al., 2020	Ray et al., in Review; Anderson et al., 2020; Amora Noguera 2022
92	Castle Semple Loch	Lake	United Kingdom	55.798	-4.609	13.8405	0.79	2.5	NA	Anderson et al., 2020	Ray et al., in Review; Anderson et al., 2020; Amora Noguera 2022
93	Catahoula Lake	Lake	United States of America	31.522	-92.114	10.4	120	NA	NA	Latuso et al., 2017	Ray et al., in Review; Anderson et al., 2020; Amora Noguera 2022
94	Cedar Lake Minnesota	Lake	United States of America	45.8135	-94.6328	20.642	0.744	NA	NA	Anderson et al., 2020	Ray et al., in Review; Anderson et al., 2020; Amora Noguera 2022
95	Cedar Lake Wisconsin	Lake	United States of America	45.2308	-92.5714	83.6831	4.491	NA	NA	Anderson et al., 2020	Ray et al., in Review; Anderson et al., 2020; Amora Noguera 2022
111	Center Lake	Lake	United States of America	43.4116	-95.1352	90.0958	0.9	NA	NA	Anderson et al., 2020	Ray et al., in Review; Anderson et al., 2020; Amora Noguera 2022
97	Chaiwopu	Lake	Russia	43.5024	43.5024	5	30	4	2	Wang et al., 2018	Ray et al., in Review; Anderson et al., 2020; Amora Noguera 2022
98	Challa	Lake	Kenya	-3.31457	37.6913	24.721	4.737	NA	NA	Anderson et al., 2020	Ray et al., in Review; Anderson et al., 2020; Amora Noguera 2022
99	Chaohu	Lake	China	31.5277	117.524	12.8575	784	4.66667	2.66667	Sun et al., 2020	Ray et al., in Review; Anderson et al., 2020; Amora Noguera 2022
100	Chenghai	Lake	China	26.55	100.663	24	77	35	26	Wang et al., 2018	Ray et al., in Review; Anderson et al., 2020; Amora Noguera 2022
101	Chenpu	Lake	China	40.39	106.49	1	3	4	1	Wang et al., 2018	Ray et al., in Review; Anderson et al., 2020; Amora Noguera 2022
102	Chibaniuehu	Lake	China	29.35	113	9	18	NA	11	Wang et al., 2018	Ray et al., in Review; Anderson et al., 2020; Amora Noguera 2022
103	Chilonche	Lake	Guatemala	16.7868	-90.0107	52.8163	NA	NA	NA	Brenner 1999 (from Amora Noguera 2022)	Ray et al., in Review; Anderson et al., 2020; Amora Noguera 2022
104	Chimaj	Lake	Guatemala	16.8592	-90.1352	13.9997	NA	NA	NA	Brenner 1999 (from Amora Noguera 2022)	Ray et al., in Review; Anderson et al., 2020; Amora Noguera 2022
105	Chorreras	Lake	Ecuador	-2.77061	-79.1599	17.4118	0.164	18	NA	Anderson et al., 2020	Ray et al., in Review; Anderson et al., 2020; Amora Noguera 2022
106	Christmas Lake	Lake	United States of America	44.8959	-93.5452	57.1501	1.048	NA	NA	Anderson et al., 2020	Ray et al., in Review; Anderson et al., 2020; Amora Noguera 2022
107	Chungara	Lake	Chile	-18.242	-69.1546	35.5581	21.5	40	NA	Anderson et al., 2020	Ray et al., in Review; Anderson et al., 2020; Amora Noguera 2022
108	Clarence-Gagnon	Lake	Canada	48.0915	-71.5292	20.5398	0.183	NA	NA	Anderson et al., 2020	Ray et al., in Review; Anderson et al., 2020; Amora Noguera 2022
109	Clarkie	Lake	Canada	52.2278	-75.4894	7.50504	24.69	13.3	2.5	Anderson et al., 2020	Ray et al., in Review; Anderson et al., 2020; Amora Noguera 2022
110	Clear	Lake	United States of America	44.4553	-94.5148	109	1.99688	2.4	NA	Mendonca et al., 2017	Ray et al., in Review; Anderson et al., 2020; Amora Noguera 2022
112	Comprido	Lake	Brazil	-2.20514	-53.9005	25	108	NA	NA	Mendonca et al., 2017	Ray et al., in Review; Anderson et al., 2020; Amora Noguera 2022
113	Conceicao	Lake	Brazil	-8.24951	-63.19	387.769	0.786	NA	NA	Anderson et al., 2020	Ray et al., in Review; Anderson et al., 2020; Amora Noguera 2022
114	Constance	Lake	Germany	47.5848	9.48375	108.725	539	151.75	NA	Mendonca et al., 2017	Ray et al., in Review; Anderson et al., 2020; Amora Noguera 2022
115	Corbet Lough	Lake	United Kingdom	54.3374	-6.1881	176.682	0.22	10	NA	Anderson et al., 2020	Ray et al., in Review; Anderson et al., 2020; Amora Noguera 2022
116	Cotacotani	Lake	Chile	-18.191	-69.2218	68.5272	6.874	NA	NA	Anderson et al., 2020	Ray et al., in Review; Anderson et al., 2020; Amora Noguera 2022
117	Creeve	Lake	United Kingdom	54.241	-6.516	71.3912	0.15	8	NA	Anderson et al., 2020	Ray et al., in Review; Anderson et al., 2020; Amora Noguera 2022
118	Cristalino Lake	Lake	Brazil	-3.13333	-60.1167	28	NA	NA	NA	Mendonca et al., 2017	Ray et al., in Review; Anderson et al., 2020; Amora Noguera 2022
119	Cruiser	Lake	United States of America	48.4986	-92.8063	25.139	0.473	27.7	NA	Anderson et al., 2020	Ray et al., in Review; Anderson et al., 2020; Amora Noguera 2022
120	Crystal Lake	Lake	United States of America	43.2301	-93.7918	142.528	1	NA	NA	Anderson et al., 2020	Ray et al., in Review; Anderson et al., 2020; Amora Noguera 2022
122	Cuo Na	Lake	China	32.0487	91.5134	29.7641	182	15	NA	Wang et al., 2018	Ray et al., in Review; Anderson et al., 2020; Amora Noguera 2022
123	Cuo'e	Lake	China	31.4402	91.4974	36.5261	348.178	5	NA	Wang et al., 2018	Ray et al., in Review; Anderson et al., 2020; Amora Noguera 2022
124	Cypress Lake	Lake	United States of America	28.0852	-81.3172	80.453	16.3421	NA	NA	Mendonca et al., 2017	Ray et al., in Review; Anderson et al., 2020; Amora Noguera 2022
139	Dalinuoer lake	Lake	China	43.295	116.635	1.01	228	NA	6.7	Mendonca et al., 2017	Ray et al., in Review; Anderson et al., 2020; Amora Noguera 2022
125	Dalonghupao Lake	Lake	China	46.7195	124.363	27.45	110.5	NA	3.5	Bao et al., 2021	Ray et al., in Review; Anderson et al., 2020; Amora Noguera 2022
126	Dark Lake Minnesota	Lake	United States of America	47.6354	-92.7815	34	0.89	NA	NA	Mendonca et al., 2017	Ray et al., in Review; Anderson et al., 2020; Amora Noguera 2022
127	Dark Lake Minnesota 2	Lake	United States of America	48.2119	-91.9647	48.7336	0.133	NA	NA	Anderson et al., 2020	Ray et al., in Review; Anderson et al., 2020; Amora Noguera 2022
129	Dead Fish Lake	Lake	United States of America	46.7471	-92.6892	152.468	0.341	NA	NA	Anderson et al., 2020	Ray et al., in Review; Anderson et al., 2020; Amora Noguera 2022
130	Dean Lake	Lake	United States of America	45.1202	-93.8347	164.822	0.696	NA	NA	Anderson et al., 2020	Ray et al., in Review; Anderson et al., 2020; Amora Noguera 2022
131	del Maule	Lake	Chile	-36.0526	-70.5	4.92372	54	50	NA	Anderson et al., 2020	Ray et al., in Review; Anderson et al., 2020; Amora Noguera 2022
132	DemarcaÁ„o	Lake	Brazil	-8.19312	-62.7711	227.2	1.145	NA	NA	Amora-Nogueira et al., 2022	Ray et al., in Review; Anderson et al., 2020; Amora Noguera 2022
133	Demarcacao	Lake	Brazil	-8.0972	-62.8481	98.7714	0.476	NA	NA	Anderson et al., 2020	Ray et al., in Review; Anderson et al., 2020; Amora Noguera 2022
134	DH	Lake	China	40.5705	112.691	0.49	81	NA	7.4	Mendonca et al., 2017	Ray et al., in Review; Anderson et al., 2020; Amora Noguera 2022
140	Diamond Lake	Lake	United States of America	43.4812	-95.1916	154.689	0.6	NA	NA	Anderson et al., 2020	Ray et al., in Review; Anderson et al., 2020; Amora Noguera 2022
136	Dianchi Lake	Lake	China	24.8319	102.699	70.94	299.333	5	4.33333	Wang et al., 2018	Ray et al., in Review; Anderson et al., 2020; Amora Noguera 2022
137	Dianshan	Lake	China	31.104	120.968	4	64	NA	2	Wang et al., 2018	Ray et al., in Review; Anderson et al., 2020; Amora Noguera 2022
138	Dixon Lake	Lake	United States of America	47.5961	-94.2873	110.004	2.225	NA	NA	Anderson et al., 2020	Ray et al., in Review; Anderson et al., 2020; Amora Noguera 2022
141	Dom Helvecio	Lake	Brazil	-19.68	-42.59	9.9	5.2	31	NA	Turcq et al., 2002	Ray et al., in Review; Anderson et al., 2020; Amora Noguera 2022
142	Dongerwuka	Lake	China	33.37	101.2	1	0.24	40	NA	Wang et al., 2018	Ray et al., in Review; Anderson et al., 2020; Amora Noguera 2022
143	Donghu	Lake	China	30.5587	114.412	14	34	3	3	Wang et al., 2018	Ray et al., in Review; Anderson et al., 2020; Amora Noguera 2022
144	Dongping	Lake	China	35.9698	116.201	8	627	2.4	1.6	Wang et al., 2018	Ray et al., in Review; Anderson et al., 2020; Amora Noguera 2022
145	Dongtinghu	Lake	China	28.83	112.68	2	2433	24	6	Wang et al., 2018	Ray et al., in Review; Anderson et al., 2020; Amora Noguera 2022
146	Dora	Lake	United States of America	28.8	-81.7	139	18.1	NA	2.4	Waters et al., 2019	Ray et al., in Review; Anderson et al., 2020; Amora Noguera 2022
147	Duck Lake Minnesota	Lake	United States of America	44.218	-93.8168	79.0006	1.123	7.6	NA	Anderson et al., 2020	Ray et al., in Review; Anderson et al., 2020; Amora Noguera 2022
148	Dune Baga	Lake	Mongolia	49.9209	93.8493	71.8011	314	NA	NA	Anderson et al., 2020	Ray et al., in Review; Anderson et al., 2020; Amora Noguera 2022
149	Dune Bayan	Lake	Mongolia	48.4631	95.1605	32.7106	6401	NA	NA	Anderson et al., 2020	Ray et al., in Review; Anderson et al., 2020; Amora Noguera 2022
150	Dunnigan	Lake	United States of America	47.7073	-91.6314	27.3092	0.336938	4.3	NA	Anderson et al., 2020	Ray et al., in Review; Anderson et al., 2020; Amora Noguera 2022
151	Dunns Lake	Lake	United States of America	45.1534	-94.4282	357.545	0.602	6.1	NA	Anderson et al., 2020	Ray et al., in Review; Anderson et al., 2020; Amora Noguera 2022
152	Dyers	Lake	United States of America	47.5286	-90.9807	34.7151	0.277	NA	NA	Anderson et al., 2020	Ray et al., in Review; Anderson et al., 2020; Amora Noguera 2022
153	E.Bah	Lake	United States of America	46.0037	-95.7635	59	0.281352	3	NA	Mendonca et al., 2017	Ray et al., in Review; Anderson et al., 2020; Amora Noguera 2022
155	East Boot Lake	Lake	United States of America	45.1643	-92.8314	149.108	0.129	NA	NA	Anderson et al., 2020	Ray et al., in Review; Anderson et al., 2020; Amora Noguera 2022
158	Edward (EO3-1G)	Lake	Uganda	-0.274642	29.7535	73.9858	2218.76	117	17	Anderson et al., 2020	Ray et al., in Review; Anderson et al., 2020; Amora Noguera 2022
159	Edwards Lake	Lake	United States of America	45.5079	-95.4687	82.293	0.692	2.8	NA	Anderson et al., 2020	Ray et al., in Review; Anderson et al., 2020; Amora Noguera 2022
160	Ek	Lake	United States of America	48.4708	-92.8352	28.8771	NA	5.8	NA	Anderson et al., 2020	Ray et al., in Review; Anderson et al., 2020; Amora Noguera 2022
161	El Sol	Lake	Mexico	19.1094	-99.759	44	0.23	15	6	Alcocer et al., 2020	Ray et al., in Review; Anderson et al., 2020; Amora Noguera 2022
162	Elbow	Lake	United States of America	40.794	-110.042	7.49	0.1	NA	10.7	Munroe and Bencher 2019	Ray et al., in Review; Anderson et al., 2020; Amora Noguera 2022
163	Element	Lake	Kenya	-0.443543	36.2492	34.5676	40	NA	1.5	Anderson et al., 2020	Ray et al., in Review; Anderson et al., 2020; Amora Noguera 2022
164	Elk Lake	Lake	United States of America	45.8689	-95.8075	154.472	0.81	NA	NA	Anderson et al., 2020	Ray et al., in Review; Anderson et al., 2020; Amora Noguera 2022
165	Ellis	Lake	Kenya	-0.124644	37.4014	32.6399	0.115	NA	NA	Anderson et al., 2020	Ray et al., in Review; Anderson et al., 2020; Amora Noguera 2022
167	ELO	Lake	United States of America	43.3804	-95.1187	114.168	7.4	NA	NA	Anderson et al., 2020	Ray et al., in Review; Anderson et al., 2020; Amora Noguera 2022
168	EM320	Lake	Canada	52.1656	-76.1208	21.3718	0.48	5.9	1.8	Anderson et al., 2020	Ray et al., in Review; Anderson et al., 2020; Amora Noguera 2022
169	Emerald Lake Montana	Lake	United States of America	45.2566	-109.695	6.87976	0.139	NA	NA	Anderson et al., 2020	Ray et al., in Review; Anderson et al., 2020; Amora Noguera 2022
170	Erhai Lake	Lake	China	25.7804	100.187	17.9	249.5	21	10	Lin et al., 20222018	Ray et al., in Review; Anderson et al., 2020; Amora Noguera 2022
171	Erie	Lake	United States of America	42.2	-81	11.1	25667	64	19	Mendonca et al., 2017	Ray et al., in Review; Anderson et al., 2020; Amora Noguera 2022
172	Erlongwan	Lake	China	42.3023	126.381	24	0.3	33	NA	Wang et al., 2018	Ray et al., in Review; Anderson et al., 2020; Amora Noguera 2022
173	Esrum	Lake	Denmark	55.9915	12.3727	69.8547	17.018	22	NA	Anderson et al., 2020	Ray et al., in Review; Anderson et al., 2020; Amora Noguera 2022
174	Estany Redo REDO 93/2	Lake	Spain	42.643	0.77	9.22302	NA	NA	NA	Anderson et al., 2020	Ray et al., in Review; Anderson et al., 2020; Amora Noguera 2022
175	Esthwaite Water	Lake	United Kingdom	54.359	-2.986	80.4784	1	15.5	6.9	Anderson et al., 2020	Ray et al., in Review; Anderson et al., 2020; Amora Noguera 2022
29	Etang d'Aureilhan	Lake	France	44.22	-1.21	363.389	2.6	4.5	NA	Anderson et al., 2020	Ray et al., in Review; Anderson et al., 2020; Amora Noguera 2022
177	Eustis	Lake	United States of America	28.9	-81.7	141	31.4	NA	2.5	Waters et al., 2019	Ray et al., in Review; Anderson et al., 2020; Amora Noguera 2022
178	Eva	Lake	Canada	48.7132	-91.1859	5.784	15	NA	NA	Anderson et al., 2020	Ray et al., in Review; Anderson et al., 2020; Amora Noguera 2022
180	F6-4	Lake	Russia	64.3167	59.0833	32.0266	NA	16	2.5	Anderson et al., 2020	Ray et al., in Review; Anderson et al., 2020; Amora Noguera 2022
181	F8-4	Lake	Russia	67.8833	59.6667	22.4023	NA	6	2.5	Anderson et al., 2020	Ray et al., in Review; Anderson et al., 2020; Amora Noguera 2022
182	Fall Lake	Lake	United States of America	47.9477	-91.74	23.3049	8.27	NA	NA	Anderson et al., 2020	Ray et al., in Review; Anderson et al., 2020; Amora Noguera 2022
183	Farm Lake	Lake	United States of America	47.8966	-91.7226	29.1102	4.6	NA	NA	Anderson et al., 2020	Ray et al., in Review; Anderson et al., 2020; Amora Noguera 2022
184	Farquhar Lake	Lake	United States of America	44.7582	-93.1654	69.6206	0.255	NA	NA	Anderson et al., 2020	Ray et al., in Review; Anderson et al., 2020; Amora Noguera 2022
185	Feia	Lake	Brazil	-15.573	-47.304	41.09	1.5	5	NA	Turcq et al., 2002	Ray et al., in Review; Anderson et al., 2020; Amora Noguera 2022
188	Fish Lake Minnesota	Lake	United States of America	44.8228	-93.1661	59.4981	0.126	10.2	NA	Anderson et al., 2020	Ray et al., in Review; Anderson et al., 2020; Amora Noguera 2022
189	Fish Lake Minnesota 2	Lake	United States of America	43.8472	-95.042	135.457	1.186	NA	NA	Anderson et al., 2020	Ray et al., in Review; Anderson et al., 2020; Amora Noguera 2022
190	Fish Lake Minnesota 3	Lake	United States of America	44.6507	-93.4601	81.9976	0.7	NA	NA	Anderson et al., 2020	Ray et al., in Review; Anderson et al., 2020; Amora Noguera 2022
186	Five Island Lake	Lake	United States of America	43.1553	-94.6499	437.623	3.9	NA	NA	Anderson et al., 2020	Ray et al., in Review; Anderson et al., 2020; Amora Noguera 2022
191	Flexal	Lake	Brazil	-1.51638	-56.273	62.96	3.6	NA	NA	Mendonca et al., 2017	Ray et al., in Review; Anderson et al., 2020; Amora Noguera 2022
192	Floating Leaf_YS	Lake	United States of America	44.9576	-110.437	30.0553	3.2	3	1.4	Anderson et al., 2020	Ray et al., in Review; Anderson et al., 2020; Amora Noguera 2022
193	Florence	Lake	United States of America	45.0108	-86.1199	32.7146	0.314	NA	NA	Anderson et al., 2020	Ray et al., in Review; Anderson et al., 2020; Amora Noguera 2022
194	Forsythe Lake	Lake	United States of America	47.2669	-93.6015	158.246	0.261	NA	NA	Anderson et al., 2020	Ray et al., in Review; Anderson et al., 2020; Amora Noguera 2022
195	Fosdick Lake	Lake	United States of America	46.2335	-94.4356	33.0569	0.113	NA	NA	Anderson et al., 2020	Ray et al., in Review; Anderson et al., 2020; Amora Noguera 2022
196	Fossil_BT	Lake	United States of America	45.0909	-109.79	9.26208	66.7	45.7	NA	Anderson et al., 2020	Ray et al., in Review; Anderson et al., 2020; Amora Noguera 2022
197	Foster_YS	Lake	United States of America	44.8732	-110.168	27.4365	3.2	5.8	2.2	Anderson et al., 2020	Ray et al., in Review; Anderson et al., 2020; Amora Noguera 2022
198	Fox Lake Minnesota	Lake	United States of America	43.6755	-94.699	75.935	3.66585	6.1	NA	Anderson et al., 2020	Ray et al., in Review; Anderson et al., 2020; Amora Noguera 2022
199	Fox Lake Minnesota 2	Lake	United States of America	44.1367	-95.646	119.413	0.69	NA	NA	Anderson et al., 2020	Ray et al., in Review; Anderson et al., 2020; Amora Noguera 2022
200	Fraser	Lake	Canada	45.3881	-72.178	22.775	1.618	NA	NA	Anderson et al., 2020	Ray et al., in Review; Anderson et al., 2020; Amora Noguera 2022
201	Frederiksborg Slotssøen	Lake	Denmark	55.9333	12.3	176.4	0.2	10	NA	Anderson et al., 2020	Ray et al., in Review; Anderson et al., 2020; Amora Noguera 2022
202	Fuxian Lake	Lake	China	24.4709	102.882	48.175	211.5	157.5	88.3	He et al., 20202018	Ray et al., in Review; Anderson et al., 2020; Amora Noguera 2022
203	Gahai Lake	Lake	China	37.1303	97.5567	12.4236	33.5	15	10	Wang et al., 2018	Ray et al., in Review; Anderson et al., 2020; Amora Noguera 2022
204	Garden Lake	Lake	United States of America	47.9228	-91.7544	34.2423	17	NA	NA	Anderson et al., 2020	Ray et al., in Review; Anderson et al., 2020; Amora Noguera 2022
205	George Lake Minnesota J	Lake	United States of America	44.2337	-93.8716	171.232	0.35	NA	NA	Anderson et al., 2020	Ray et al., in Review; Anderson et al., 2020; Amora Noguera 2022
206	George Lake Minnesota S	Lake	United States of America	45.2427	-94.9841	29.71	0.88	NA	NA	Mendonca et al., 2017	Ray et al., in Review; Anderson et al., 2020; Amora Noguera 2022
208	Gervais Lake	Lake	United States of America	45.0225	-93.0694	93.1047	0.943	NA	NA	Anderson et al., 2020	Ray et al., in Review; Anderson et al., 2020; Amora Noguera 2022
209	Gil-Bret	Lake	United States of America	45.4296	-95.3581	49	0.100701	2.2	NA	Mendonca et al., 2017	Ray et al., in Review; Anderson et al., 2020; Amora Noguera 2022
210	Gilchrist Lake	Lake	United States of America	45.4727	-95.3619	74.7101	1.307	NA	NA	Anderson et al., 2020	Ray et al., in Review; Anderson et al., 2020; Amora Noguera 2022
211	Gjersjoen	Lake	Norway	59.78	10.78	55.2207	2.41	64	NA	Anderson et al., 2020	Ray et al., in Review; Anderson et al., 2020; Amora Noguera 2022
212	Gleason Lake	Lake	United States of America	44.9778	-93.4933	346.977	0.507	NA	NA	Anderson et al., 2020	Ray et al., in Review; Anderson et al., 2020; Amora Noguera 2022
213	Gonghai	Lake	China	38.909	112.234	13	0.21	NA	NA	Wang et al., 2018	Ray et al., in Review; Anderson et al., 2020; Amora Noguera 2022
214	Grand Lac Montagnais	Lake	Canada	47.9186	-71.2057	18.7282	0.726	NA	NA	Anderson et al., 2020	Ray et al., in Review; Anderson et al., 2020; Amora Noguera 2022
215	Grand Sable	Lake	United States of America	46.6479	-86.0336	33.7622	2.644	19.2	NA	Anderson et al., 2020	Ray et al., in Review; Anderson et al., 2020; Amora Noguera 2022
216	Grassy	Lake	United States of America	47.8035	-92.0432	23.6078	0.36	NA	NA	Anderson et al., 2020	Ray et al., in Review; Anderson et al., 2020; Amora Noguera 2022
217	Greenleaf Lake	Lake	United States of America	44.399	-93.6264	424.372	1.224	5.8	NA	Anderson et al., 2020	Ray et al., in Review; Anderson et al., 2020; Amora Noguera 2022
218	Greenstone	Lake	United States of America	47.9324	-91.6056	24.6012	1.31	NA	NA	Anderson et al., 2020	Ray et al., in Review; Anderson et al., 2020; Amora Noguera 2022
219	Greifensee	Lake	Switzerland	47.35	8.683	46.8	8.49	32.5	NA	Mendonca et al., 2017	Ray et al., in Review; Anderson et al., 2020; Amora Noguera 2022
220	Griffin	Lake	United States of America	28.8	-81.9	177	38	NA	2	Waters et al., 2019	Ray et al., in Review; Anderson et al., 2020; Amora Noguera 2022
221	Guchengu	Lake	China	31.2808	118.919	15	25	4	2	Wang et al., 2018	Ray et al., in Review; Anderson et al., 2020; Amora Noguera 2022
222	Guile Lake	Lake	United States of America	47.2404	-93.6784	32.9132	0.358	NA	NA	Anderson et al., 2020	Ray et al., in Review; Anderson et al., 2020; Amora Noguera 2022
223	Hala	Lake	China	38.297	97.571	3	603	65	27	Wang et al., 2018	Ray et al., in Review; Anderson et al., 2020; Amora Noguera 2022
224	Hallwilersee	Lake	Switzerland	47.2795	8.21723	28.8	10.3	47	NA	Anderson et al., 2020	Ray et al., in Review; Anderson et al., 2020; Amora Noguera 2022
225	Harris	Lake	United States of America	28.8	-81.8	130	75.8	NA	3.3	Waters et al., 2019	Ray et al., in Review; Anderson et al., 2020; Amora Noguera 2022
226	Harvey	Lake	United States of America	48.0507	-88.796	40.5983	0.509	NA	NA	Anderson et al., 2020	Ray et al., in Review; Anderson et al., 2020; Amora Noguera 2022
227	Heart_BT	Lake	United States of America	45.024	-109.639	9.9428	16.2	45.7	NA	Anderson et al., 2020	Ray et al., in Review; Anderson et al., 2020; Amora Noguera 2022
228	Henderson Lake	Lake	United States of America	45.2304	-94.9931	52.9362	0.272	17.4	NA	Anderson et al., 2020	Ray et al., in Review; Anderson et al., 2020; Amora Noguera 2022
229	High Island	Lake	United States of America	43.3028	-94.7064	128.739	1.9	NA	NA	Anderson et al., 2020	Ray et al., in Review; Anderson et al., 2020; Amora Noguera 2022
231	Hill Lake	Lake	United States of America	46.4735	-93.765	44.8428	0.106	NA	NA	Anderson et al., 2020	Ray et al., in Review; Anderson et al., 2020; Amora Noguera 2022
233	Holyname Lake	Lake	United States of America	45.0156	-93.5307	91.6239	0.264	NA	NA	Anderson et al., 2020	Ray et al., in Review; Anderson et al., 2020; Amora Noguera 2022
234	Hong Lake	Lake	China	29.9001	113.405	86.6	339	2	1.75	Mendonca et al., 2017	Ray et al., in Review; Anderson et al., 2020; Amora Noguera 2022
235	Hongjiannao	Lake	China	39.08	109.56	9	60	11	8	Wang et al., 2018	Ray et al., in Review; Anderson et al., 2020; Amora Noguera 2022
236	Hongshan	Lake	China	34.8275	80.0528	2	3	NA	NA	Wang et al., 2018	Ray et al., in Review; Anderson et al., 2020; Amora Noguera 2022
237	Hongyan Lake	Lake	China	47.3492	123.391	84.77	10.1	NA	0.5	Bao et al., 2021	Ray et al., in Review; Anderson et al., 2020; Amora Noguera 2022
238	Hook Lake	Lake	United States of America	44.9556	-94.339	254.835	1.303	5.5	NA	Anderson et al., 2020	Ray et al., in Review; Anderson et al., 2020; Amora Noguera 2022
239	Hulun Lake	Lake	China	48.9845	117.513	35.68	2339	8	5.6	Zhang et al., 2018	Ray et al., in Review; Anderson et al., 2020; Amora Noguera 2022
240	Humaitá	Lake	Brazil	-8.16667	-63.7822	12.65	NA	NA	NA	Mendonca et al., 2017	Ray et al., in Review; Anderson et al., 2020; Amora Noguera 2022
241	Huoshaoeipao Lake	Lake	China	46.5914	124.164	23.2	65.6	NA	4.5	Bao et al., 2021	Ray et al., in Review; Anderson et al., 2020; Amora Noguera 2022
242	Iliamna	Lake	United States of America	59.5367	-155.024	0.8	2622	393	44	Mendonca et al., 2017	Ray et al., in Review; Anderson et al., 2020; Amora Noguera 2022
243	Ingham Lake	Lake	United States of America	43.3187	-94.6967	146.127	1.4	NA	NA	Anderson et al., 2020	Ray et al., in Review; Anderson et al., 2020; Amora Noguera 2022
244	Intermediate	Lake	United States of America	48.0304	-88.7284	32	70.8	6.7	NA	Hobbs 2013 (from Amora Noguera 2022)	Ray et al., in Review; Anderson et al., 2020; Amora Noguera 2022
245	Iowa Lake	Lake	United States of America	43.4983	-94.4585	123.417	3.2	NA	NA	Anderson et al., 2020	Ray et al., in Review; Anderson et al., 2020; Amora Noguera 2022
246	Island Lake Minnesota	Lake	United States of America	44.3791	-96.0094	123.172	0.639	2.3	NA	Anderson et al., 2020	Ray et al., in Review; Anderson et al., 2020; Amora Noguera 2022
247	Island Lake Reservoir	Lake	United States of America	47.0077	-92.2024	120.921	66	NA	NA	Anderson et al., 2020	Ray et al., in Review; Anderson et al., 2020; Amora Noguera 2022
248	Island Lake Utah	Lake	United States of America	40.83	-110.145	2.87	0.453	NA	11.4	Munroe and Bencher 2019	Ray et al., in Review; Anderson et al., 2020; Amora Noguera 2022
249	Jakes	Lake	Canada	54.3245	-122.712	7.73764	0.58	15	6.5	Anderson et al., 2020	Ray et al., in Review; Anderson et al., 2020; Amora Noguera 2022
250	Jessie Lake	Lake	United States of America	47.5852	-93.8163	75.6567	7.03	NA	NA	Anderson et al., 2020	Ray et al., in Review; Anderson et al., 2020; Amora Noguera 2022
251	Jili	Lake	China	46.93	87.43	1	174	15	10	Wang et al., 2018	Ray et al., in Review; Anderson et al., 2020; Amora Noguera 2022
252	Johnson Lake	Lake	United States of America	47.3756	-91.1893	36.291	0.123	NA	NA	Anderson et al., 2020	Ray et al., in Review; Anderson et al., 2020; Amora Noguera 2022
253	Justine	Lake	Canada	54.2118	-124.938	9.47062	2.48	10	5.7	Anderson et al., 2020	Ray et al., in Review; Anderson et al., 2020; Amora Noguera 2022
254	Kabetogama	Lake	United States of America	48.4583	-93.0419	38.0278	40.25	24.4	NA	Anderson et al., 2020	Ray et al., in Review; Anderson et al., 2020; Amora Noguera 2022
255	Kako	Lake	Uganda	-0.306908	30.0975	144.948	0.202	NA	NA	Anderson et al., 2020	Ray et al., in Review; Anderson et al., 2020; Amora Noguera 2022
256	Kalandsvatenet	Lake	Norway	60.27	5.42	24.1959	3.33	110	NA	Anderson et al., 2020	Ray et al., in Review; Anderson et al., 2020; Amora Noguera 2022
257	Kamunzuka	Lake	Uganda	-0.262534	30.1561	32.3785	0.25	NA	NA	Anderson et al., 2020	Ray et al., in Review; Anderson et al., 2020; Amora Noguera 2022
258	Kansas	Lake	United States of America	43.9171	-94.6968	119.518	1.576	NA	NA	Anderson et al., 2020	Ray et al., in Review; Anderson et al., 2020; Amora Noguera 2022
259	Kassjön	Lake	Sweden	63.9242	20.0107	8.03	0.21	12.2	5.5	Mendonca et al., 2017	Ray et al., in Review; Anderson et al., 2020; Amora Noguera 2022
260	Katinda	Lake	Uganda	-0.220185	30.1064	27.281	0.455	NA	NA	Anderson et al., 2020	Ray et al., in Review; Anderson et al., 2020; Amora Noguera 2022
262	Keluke	Lake	China	37.2861	96.882	31.5698	57	13	8	Anderson et al., 2020	Ray et al., in Review; Anderson et al., 2020; Amora Noguera 2022
263	Kemen Co	Lake	China	28.688	85.9491	50.5149	2.3	NA	NA	Wang et al., 2018	Ray et al., in Review; Anderson et al., 2020; Amora Noguera 2022
264	Kenfig Pool	Lake	United Kingdom	51.52	-3.736	80.9919	0.24	2.6	NA	Anderson et al., 2020	Ray et al., in Review; Anderson et al., 2020; Amora Noguera 2022
265	Keqin Lake	Lake	China	47.3052	124.303	50.14	13.8	NA	2.5	Bao et al., 2021	Ray et al., in Review; Anderson et al., 2020; Amora Noguera 2022
266	KHAR	Lake	Russia	67.3628	62.7507	4.53083	0.4	NA	NA	Anderson et al., 2020	Ray et al., in Review; Anderson et al., 2020; Amora Noguera 2022
267	Khundt Nuur	Lake	Mongolia	49.0498	97.1605	119.417	2678	NA	NA	Anderson et al., 2020	Ray et al., in Review; Anderson et al., 2020; Amora Noguera 2022
268	Kigezi	Lake	Uganda	-0.287296	30.1107	83.6478	0.102	NA	NA	Anderson et al., 2020	Ray et al., in Review; Anderson et al., 2020; Amora Noguera 2022
269	Kilbirnie Loch	Lake	United Kingdom	55.755	-4.661	17.3323	0.81	9.2	NA	Anderson et al., 2020	Ray et al., in Review; Anderson et al., 2020; Amora Noguera 2022
270	Kinneret	Lake	Israel	32.8445	35.5707	41	166	17.75	NA	Mendonca et al., 2017	Ray et al., in Review; Anderson et al., 2020; Amora Noguera 2022
271	Kitagata	Lake	Uganda	-0.065877	29.9747	30.908	0.62	9	NA	Anderson et al., 2020	Ray et al., in Review; Anderson et al., 2020; Amora Noguera 2022
272	Kitandara	Lake	Uganda	0.348504	29.8863	34.8169	2.86	9	NA	Anderson et al., 2020	Ray et al., in Review; Anderson et al., 2020; Amora Noguera 2022
273	Kivu	Lake	Rwanda	-2.02333	29.1879	18	2370	175	NA	Mendonca et al., 2017	Ray et al., in Review; Anderson et al., 2020; Amora Noguera 2022
274	Kjostad	Lake	United States of America	48.1101	-92.6113	19.7644	1.785	15.2	NA	Anderson et al., 2020	Ray et al., in Review; Anderson et al., 2020; Amora Noguera 2022
275	Knudsø	Lake	Denmark	56.1016	9.77027	36.1304	0.56	29	NA	Anderson et al., 2020	Ray et al., in Review; Anderson et al., 2020; Amora Noguera 2022
276	Kohlboo	Lake	Mongolia	49.7014	91.0915	23.1251	10	NA	NA	Anderson et al., 2020	Ray et al., in Review; Anderson et al., 2020; Amora Noguera 2022
277	Kreighle Lake	Lake	United States of America	45.5814	-94.4779	48.924	0.409	20.1	NA	Anderson et al., 2020	Ray et al., in Review; Anderson et al., 2020; Amora Noguera 2022
278	Kyasanduku	Lake	Uganda	-0.288089	30.0501	75.8626	0.539	2	NA	Anderson et al., 2020	Ray et al., in Review; Anderson et al., 2020; Amora Noguera 2022
279	L1	Lake	Sweden	68.3588	19.0344	12	0.1385	8.5	2.3	Lundin 2015 (from Amora Noguera 2022)	Ray et al., in Review; Anderson et al., 2020; Amora Noguera 2022
280	Labyrinthe	Lake	Canada	52.2261	-75.7136	25.128	2.57	21.2	1.4	Anderson et al., 2020	Ray et al., in Review; Anderson et al., 2020; Amora Noguera 2022
286	Lac Brendan	Lake	Canada	52.0653	-75.5028	16.4394	1.07	16	3.2	Anderson et al., 2020	Ray et al., in Review; Anderson et al., 2020; Amora Noguera 2022
31	Lac d'Aydat	Lake	France	45.66	2.98	111.366	0.6	15	NA	Anderson et al., 2020	Ray et al., in Review; Anderson et al., 2020; Amora Noguera 2022
288	Lac Dasserat	Lake	Canada	48.2492	-79.4063	10.955	29	NA	NA	Anderson et al., 2020	Ray et al., in Review; Anderson et al., 2020; Amora Noguera 2022
207	Lac de Gerardmer	Lake	France	48.06	6.99	23.0483	1.2	37	NA	Anderson et al., 2020	Ray et al., in Review; Anderson et al., 2020; Amora Noguera 2022
290	Lac La Croix	Lake	Canada	48.3497	-92.1341	16.402	120	51.2	NA	Anderson et al., 2020	Ray et al., in Review; Anderson et al., 2020; Amora Noguera 2022
291	Lac Mistumis	Lake	Canada	52.1617	-76.1808	9.38201	3.97	14.6	1.8	Anderson et al., 2020	Ray et al., in Review; Anderson et al., 2020; Amora Noguera 2022
292	Lac Richelieu	Lake	Canada	48.156	-71.3509	12.4131	0.112	NA	NA	Anderson et al., 2020	Ray et al., in Review; Anderson et al., 2020; Amora Noguera 2022
293	Lac Speke	Lake	Uganda	0.40535	29.8812	20.9153	0.12	NA	NA	Anderson et al., 2020	Ray et al., in Review; Anderson et al., 2020; Amora Noguera 2022
294	Lading So	Lake	Denmark	56.2172	9.96436	79.2833	0.39	1.5	NA	Anderson et al., 2020	Ray et al., in Review; Anderson et al., 2020; Amora Noguera 2022
295	Lady Slipper Lake	Lake	United States of America	44.5728	-95.6319	95.9793	1.2	3.4	NA	Anderson et al., 2020	Ray et al., in Review; Anderson et al., 2020; Amora Noguera 2022
296	Lago Acarabixi	Lake	Brazil	-0.345097	-64.4972	265	0.36	NA	NA	Mendonca et al., 2017	Ray et al., in Review; Anderson et al., 2020; Amora Noguera 2022
297	Lago Grande de Curuai	Lake	Brazil	-2.03879	-55.524	100	359	NA	NA	Mendonca et al., 2017	Ray et al., in Review; Anderson et al., 2020; Amora Noguera 2022
298	Lago Santa Ninha	Lake	Brazil	-2.1145	-55.4327	91	1340	NA	NA	Mendonca et al., 2017	Ray et al., in Review; Anderson et al., 2020; Amora Noguera 2022
299	Laguna Caldera CALD 93/1	Lake	Portugal	40.355	-7.635	8.05545	NA	NA	NA	Anderson et al., 2020	Ray et al., in Review; Anderson et al., 2020; Amora Noguera 2022
300	laguna mar chiquita	Lake	Argentina	-30.7187	-62.5415	32.8	NA	NA	NA	Piovanno 2004 (from Amora Noguera 2022)	Ray et al., in Review; Anderson et al., 2020; Amora Noguera 2022
281	Lake 11	Lake	Canada	52.1525	-75.76	6.90124	0.34	NA	NA	Anderson et al., 2020	Ray et al., in Review; Anderson et al., 2020; Amora Noguera 2022
301	Lake 239 (Rawson Lake)	Lake	Canada	49.663	-93.724	10.04	0.55	30.4	10.9	Hall et al., 2019	Ray et al., in Review; Anderson et al., 2020; Amora Noguera 2022
282	Lake 34	Lake	Canada	51.9847	-75.7669	11.4657	0.5	NA	NA	Anderson et al., 2020	Ray et al., in Review; Anderson et al., 2020; Amora Noguera 2022
283	Lake 40	Lake	Canada	52.0294	-75.5236	20.6441	0.17	NA	NA	Anderson et al., 2020	Ray et al., in Review; Anderson et al., 2020; Amora Noguera 2022
284	Lake 60	Lake	Canada	52.2317	-75.7617	5.42874	1.4	NA	NA	Anderson et al., 2020	Ray et al., in Review; Anderson et al., 2020; Amora Noguera 2022
285	Lake 8	Lake	Canada	52.1319	-75.7239	27.5577	0.33	NA	NA	Anderson et al., 2020	Ray et al., in Review; Anderson et al., 2020; Amora Noguera 2022
306	Lake Aguilo AGUI 93/2	Lake	France	42.71	1.33	29.0386	NA	NA	NA	Anderson et al., 2020	Ray et al., in Review; Anderson et al., 2020; Amora Noguera 2022
307	Lake B	Lake	Greenland	67.27	-51.58	3.248	0.9	31	NA	Anderson et al., 2019	Ray et al., in Review; Anderson et al., 2020; Amora Noguera 2022
308	Lake Bala	Lake	United Kingdom	52.888	-3.623	111.563	4.15	40	NA	Anderson et al., 2020	Ray et al., in Review; Anderson et al., 2020; Amora Noguera 2022
309	Lake Ballinger	Lake	United States of America	47.7817	-122.327	76.9471	0.407219	11	4.6	Mendonca et al., 2017	Ray et al., in Review; Anderson et al., 2020; Amora Noguera 2022
310	Lake Bled	Lake	Slovenia	46.36	14.1	44.408	1.48	32	NA	Anderson et al., 2020	Ray et al., in Review; Anderson et al., 2020; Amora Noguera 2022
311	Lake Calado	Lake	Brazil	-3.27187	-60.5806	84	5.66	NA	NA	Mendonca et al., 2017	Ray et al., in Review; Anderson et al., 2020; Amora Noguera 2022
312	Lake Calhoun	Lake	United States of America	44.9405	-93.3125	62.945	1.65	NA	NA	Anderson et al., 2020	Ray et al., in Review; Anderson et al., 2020; Amora Noguera 2022
313	Lake Carlos	Lake	United States of America	45.9624	-95.3637	45.2888	10.527	NA	NA	Anderson et al., 2020	Ray et al., in Review; Anderson et al., 2020; Amora Noguera 2022
314	Lake Christina (East Basin)	Lake	United States of America	46.0834	-95.6925	119.708	1.36	4.3	NA	Anderson et al., 2020	Ray et al., in Review; Anderson et al., 2020; Amora Noguera 2022
315	Lake Christina (West Basin)	Lake	United States of America	46.0868	-95.7472	192.203	14.6	1.3	NA	Anderson et al., 2020	Ray et al., in Review; Anderson et al., 2020; Amora Noguera 2022
316	Lake Elmo	Lake	United States of America	44.981	-92.8859	105.688	1.09	8.5	NA	Anderson et al., 2020	Ray et al., in Review; Anderson et al., 2020; Amora Noguera 2022
317	Lake Emily Minnesota	Lake	United States of America	44.9576	-94.33	93.3092	0.308	1.6	NA	Anderson et al., 2020	Ray et al., in Review; Anderson et al., 2020; Amora Noguera 2022
318	Lake Emily Minnesota 2	Lake	United States of America	44.2852	-93.8802	393.315	0.419	11.3	NA	Anderson et al., 2020	Ray et al., in Review; Anderson et al., 2020; Amora Noguera 2022
319	Lake Ferrell	Lake	United States of America	46.1147	-94.4183	179.644	0.194	NA	NA	Anderson et al., 2020	Ray et al., in Review; Anderson et al., 2020; Amora Noguera 2022
320	Lake Harriet	Lake	United States of America	44.9213	-93.3034	73.2803	1.368	26	NA	Anderson et al., 2020	Ray et al., in Review; Anderson et al., 2020; Amora Noguera 2022
321	Lake Hell'n Blazes	Lake	India	28.0205	80.7963	174	1.1	NA	NA	Brenner 1999 (from Amora Noguera 2022)	Ray et al., in Review; Anderson et al., 2020; Amora Noguera 2022
322	Lake Huron	Lake	Canada	44.8	-82.4	3.35	59600	229	59	Mendonca et al., 2017	Ray et al., in Review; Anderson et al., 2020; Amora Noguera 2022
323	Lake Johanna	Lake	United States of America	45.0439	-93.1698	126.335	0.831	NA	NA	Anderson et al., 2020	Ray et al., in Review; Anderson et al., 2020; Amora Noguera 2022
324	Lake Josephine	Lake	United States of America	45.0365	-93.1547	490.672	0.448	NA	NA	Anderson et al., 2020	Ray et al., in Review; Anderson et al., 2020; Amora Noguera 2022
325	Lake LHomme Dieu	Lake	United States of America	45.9324	-95.3509	96.6498	7.248	NA	NA	Anderson et al., 2020	Ray et al., in Review; Anderson et al., 2020; Amora Noguera 2022
326	Lake Louisa	Lake	United States of America	45.3086	-94.2461	117.522	0.704	NA	NA	Anderson et al., 2020	Ray et al., in Review; Anderson et al., 2020; Amora Noguera 2022
327	Lake Minnewashta	Lake	United States of America	43.3601	-95.1244	167.709	0.5	5	NA	Anderson et al., 2020	Ray et al., in Review; Anderson et al., 2020; Amora Noguera 2022
328	Lake Mjøsa	Lake	Norway	60.765	11.0317	11.9589	362	453	154	Anderson et al., 2020	Ray et al., in Review; Anderson et al., 2020; Amora Noguera 2022
329	Lake Muijongo	Lake	Uganda	-0.271083	30.0851	14.6648	0.565	NA	NA	Anderson et al., 2020	Ray et al., in Review; Anderson et al., 2020; Amora Noguera 2022
330	Lake Nakomis	Lake	United States of America	44.9074	-93.2433	78.9382	0.828	NA	NA	Anderson et al., 2020	Ray et al., in Review; Anderson et al., 2020; Amora Noguera 2022
331	Lake of Menteith	Lake	United Kingdom	56.174	-4.292	131.275	2.5	23	NA	Anderson et al., 2020	Ray et al., in Review; Anderson et al., 2020; Amora Noguera 2022
332	Lake of the Woods	Lake	United States of America	49.0535	-94.9509	40.1684	4350	210	NA	Anderson et al., 2020	Ray et al., in Review; Anderson et al., 2020; Amora Noguera 2022
333	Lake Owasso	Lake	United States of America	45.0384	-93.1171	383.692	1.46	NA	NA	Anderson et al., 2020	Ray et al., in Review; Anderson et al., 2020; Amora Noguera 2022
334	Lake Pepin	Lake	United States of America	44.466	-92.2525	227.386	118	18	6.4	Anderson et al., 2020	Ray et al., in Review; Anderson et al., 2020; Amora Noguera 2022
335	Lake Sagatagan	Lake	United States of America	45.5745	-94.3895	266.548	0.71	12.5	2.7	Anderson et al., 2020	Ray et al., in Review; Anderson et al., 2020; Amora Noguera 2022
336	Lake Shagawa	Lake	United States of America	47.9092	-91.8946	106.233	9.6	14.6	NA	Anderson et al., 2020	Ray et al., in Review; Anderson et al., 2020; Amora Noguera 2022
337	Lake St. Croix	Lake	United States of America	44.9365	-92.7565	175.112	31.1	18	NA	Anderson et al., 2020	Ray et al., in Review; Anderson et al., 2020; Amora Noguera 2022
338	Lake Superior	Lake	United States of America	46.8982	-86.5007	3.81	82000	406	147	Anderson et al., 2020	Ray et al., in Review; Anderson et al., 2020; Amora Noguera 2022
339	Lake Superior (Duluth Harbor)	Lake	United States of America	46.766	-92.0948	92.148	NA	NA	NA	Anderson et al., 2020	Ray et al., in Review; Anderson et al., 2020; Amora Noguera 2022
340	Lake Superior (Moskey Bay)	Lake	United States of America	48.069	-88.6357	43.4087	NA	NA	NA	Anderson et al., 2020	Ray et al., in Review; Anderson et al., 2020; Amora Noguera 2022
341	Lake Suzanne	Lake	United States of America	44.8519	-93.5394	186.287	0.33	NA	NA	Anderson et al., 2020	Ray et al., in Review; Anderson et al., 2020; Amora Noguera 2022
342	Lake Towuti	Lake	Indonesia	-2.71258	121.541	6.86506	561	203	120	Anderson et al., 2020	Ray et al., in Review; Anderson et al., 2020; Amora Noguera 2022
343	Lake Washington	Lake	India	28.1504	80.7407	143	17.65	NA	NA	Brenner 1999 (from Amora Noguera 2022)	Ray et al., in Review; Anderson et al., 2020; Amora Noguera 2022
344	Lake Winnibigoshish	Lake	United States of America	47.4244	-94.2441	61.2163	228.5	21.3	NA	Anderson et al., 2020	Ray et al., in Review; Anderson et al., 2020; Amora Noguera 2022
345	Lake Winona Minnesota W	Lake	United States of America	44.0379	-91.6371	124.464	0.94	NA	NA	Anderson et al., 2020	Ray et al., in Review; Anderson et al., 2020; Amora Noguera 2022
346	Lake Wirth	Lake	United States of America	44.9824	-93.3233	202.187	0.161	NA	NA	Anderson et al., 2020	Ray et al., in Review; Anderson et al., 2020; Amora Noguera 2022
347	Langesø	Lake	Denmark	55.4346	10.1948	420.878	0.17	4.5	NA	Anderson et al., 2020	Ray et al., in Review; Anderson et al., 2020; Amora Noguera 2022
348	Laurie	Lake	Canada	53.8783	-124.888	9.5113	1	23	9.9	Anderson et al., 2020	Ray et al., in Review; Anderson et al., 2020; Amora Noguera 2022
349	LC1	Lake	Brazil	-2.20264	-55.7939	78.659	7.133	NA	NA	Amora-Nogueira et al., 2022	Ray et al., in Review; Anderson et al., 2020; Amora Noguera 2022
350	LCO	Lake	United States of America	42.7846	-93.6891	124.27	1	NA	NA	Anderson et al., 2020	Ray et al., in Review; Anderson et al., 2020; Amora Noguera 2022
353	Liangzihu	Lake	China	30.2351	114.509	12	304	NA	4	Wang et al., 2018	Ray et al., in Review; Anderson et al., 2020; Amora Noguera 2022
354	Lianhuan	Lake	China	46.314	124.079	7	556	5	2	Wang et al., 2018	Ray et al., in Review; Anderson et al., 2020; Amora Noguera 2022
356	Lilla Sångaren	Lake	Sweden	59.8997	15.3935	32	0.24	17	NA	Mendonca et al., 2017	Ray et al., in Review; Anderson et al., 2020; Amora Noguera 2022
357	Lindores Loch	Lake	United Kingdom	56.334	-3.187	23.6925	0.405	3.5	NA	Anderson et al., 2020	Ray et al., in Review; Anderson et al., 2020; Amora Noguera 2022
358	Little Bass Lake	Lake	United States of America	47.286	-93.5994	36.1842	0.637	NA	NA	Anderson et al., 2020	Ray et al., in Review; Anderson et al., 2020; Amora Noguera 2022
359	Little Bonnet	Lake	United States of America	27.6	-81.5	64	0.3	NA	NA	Waters et al., 2019	Ray et al., in Review; Anderson et al., 2020; Amora Noguera 2022
360	Little Carnelian Lake	Lake	United States of America	45.1176	-92.7952	26.5917	0.309	NA	NA	Anderson et al., 2020	Ray et al., in Review; Anderson et al., 2020; Amora Noguera 2022
362	Little Long Lake	Lake	United States of America	44.9877	-93.5628	30.7549	1.11	NA	NA	Anderson et al., 2020	Ray et al., in Review; Anderson et al., 2020; Amora Noguera 2022
363	Little Lower Elk Lake	Lake	United States of America	45.8575	-95.7907	72.0796	0.536	4	NA	Anderson et al., 2020	Ray et al., in Review; Anderson et al., 2020; Amora Noguera 2022
364	Little Spirit Lake	Lake	United States of America	43.5124	-95.1263	117.106	2.4	NA	NA	Anderson et al., 2020	Ray et al., in Review; Anderson et al., 2020; Amora Noguera 2022
365	Little Trout Lake Minnesota	Lake	United States of America	48.3972	-92.5227	17.174	1.06	29	NA	Anderson et al., 2020	Ray et al., in Review; Anderson et al., 2020; Amora Noguera 2022
366	Little Trout Lake Minnesota 2	Lake	United States of America	47.9984	-92.2798	17.2385	2.1	NA	NA	Anderson et al., 2020	Ray et al., in Review; Anderson et al., 2020; Amora Noguera 2022
367	Little Turtle Lake	Lake	United States of America	45.8844	-95.8459	152.569	0.452	5.2	NA	Anderson et al., 2020	Ray et al., in Review; Anderson et al., 2020; Amora Noguera 2022
368	Little Wall Lake	Lake	United States of America	42.2689	-93.6359	64.1624	1	NA	NA	Anderson et al., 2020	Ray et al., in Review; Anderson et al., 2020; Amora Noguera 2022
369	Little Wilson	Lake	United States of America	47.6581	-91.0666	83.9901	0.205	NA	NA	Anderson et al., 2020	Ray et al., in Review; Anderson et al., 2020; Amora Noguera 2022
370	Llagi LAG3	Lake	United Kingdom	53.015	-4.015	19.9562	0.55	NA	NA	Anderson et al., 2020	Ray et al., in Review; Anderson et al., 2020; Amora Noguera 2022
371	Llangors Lake	Lake	United Kingdom	51.93	-3.263	246.4	1.4	9	NA	Anderson et al., 2020	Ray et al., in Review; Anderson et al., 2020; Amora Noguera 2022
372	Llaviacu	Lake	Ecuador	-2.84271	-79.1472	108.412	0.19	17	NA	Anderson et al., 2020	Ray et al., in Review; Anderson et al., 2020; Amora Noguera 2022
373	Locator Lake	Lake	United States of America	48.5412	-93.0056	15.9646	0.552	15.8	NA	Anderson et al., 2020	Ray et al., in Review; Anderson et al., 2020; Amora Noguera 2022
21	Loch Arkaig	Lake	United Kingdom	56.97	-5.154	42.7158	15.97	100	NA	Anderson et al., 2020	Ray et al., in Review; Anderson et al., 2020; Amora Noguera 2022
30	Loch Awe	Lake	United Kingdom	56.308	-5.226	144.2	38	94	NA	Anderson et al., 2020	Ray et al., in Review; Anderson et al., 2020; Amora Noguera 2022
128	Loch Davan	Lake	United Kingdom	57.094	-2.923	114.024	0.42	2.7	NA	Anderson et al., 2020	Ray et al., in Review; Anderson et al., 2020; Amora Noguera 2022
154	Loch Earn	Lake	United Kingdom	56.387	-4.203	86.9758	9.5	88	NA	Anderson et al., 2020	Ray et al., in Review; Anderson et al., 2020; Amora Noguera 2022
179	Loch Eye	Lake	United Kingdom	57.792	-3.967	32.3933	1.6	2.1	NA	Anderson et al., 2020	Ray et al., in Review; Anderson et al., 2020; Amora Noguera 2022
379	Loch Flemington	Lake	United Kingdom	57.5425	-3.99	91.8193	0.15	2.2	NA	Anderson et al., 2020	Ray et al., in Review; Anderson et al., 2020; Amora Noguera 2022
386	Loch Kinord	Lake	United Kingdom	56.675	-3.043	78.7684	0.77	3.5	NA	Anderson et al., 2020	Ray et al., in Review; Anderson et al., 2020; Amora Noguera 2022
351	Loch Leven	Lake	United Kingdom	56.198	-3.376	26.591	13.7	25.5	NA	Anderson et al., 2020	Ray et al., in Review; Anderson et al., 2020; Amora Noguera 2022
382	Loch Lomond	Lake	United Kingdom	56.115	-4.622	10.7695	71	190	NA	Anderson et al., 2020	Ray et al., in Review; Anderson et al., 2020; Amora Noguera 2022
383	Loch Lubnaig	Lake	United Kingdom	56.288	-4.288	68.8781	2.3	42	NA	Anderson et al., 2020	Ray et al., in Review; Anderson et al., 2020; Amora Noguera 2022
384	Loch Maree	Lake	United Kingdom	57.652	-5.379	9.53105	28	112	NA	Anderson et al., 2020	Ray et al., in Review; Anderson et al., 2020; Amora Noguera 2022
385	Loch Monzievaird	Lake	United Kingdom	56.3876	-3.88	94.5717	0.163	10	NA	Anderson et al., 2020	Ray et al., in Review; Anderson et al., 2020; Amora Noguera 2022
387	Loch of Skene	Lake	United Kingdom	57.157	-2.358	68.7618	1.1	1.8	NA	Anderson et al., 2020	Ray et al., in Review; Anderson et al., 2020; Amora Noguera 2022
388	Loch of the Lowes	Lake	United Kingdom	56.577	-3.549	33.0995	0.88	12.5	NA	Anderson et al., 2020	Ray et al., in Review; Anderson et al., 2020; Amora Noguera 2022
389	Loch Shiel	Lake	United Kingdom	56.785	-5.608	42.8233	19.93	140	NA	Anderson et al., 2020	Ray et al., in Review; Anderson et al., 2020; Amora Noguera 2022
390	Loch Ussie	Lake	United Kingdom	57.579	-4.502	50.3115	0.82	12	NA	Anderson et al., 2020	Ray et al., in Review; Anderson et al., 2020; Amora Noguera 2022
157	LochEck	Lake	United Kingdom	56.102	-4.991	78.2666	4.3	45	NA	Anderson et al., 2020	Ray et al., in Review; Anderson et al., 2020; Amora Noguera 2022
392	Lochloosa	Lake	United States of America	29.5	-82.1	106	22.9	NA	1.8	Waters et al., 2019	Ray et al., in Review; Anderson et al., 2020; Amora Noguera 2022
393	Loiten	Lake	United States of America	48.5256	-92.9233	8.51246	0.378	NA	NA	Anderson et al., 2020	Ray et al., in Review; Anderson et al., 2020; Amora Noguera 2022
395	Lone Tree Lake	Lake	United States of America	44.6895	-95.4445	107.569	0.357	2.7	NA	Anderson et al., 2020	Ray et al., in Review; Anderson et al., 2020; Amora Noguera 2022
396	Long Lake Minnesota C	Lake	United States of America	47.2246	-93.6534	22.47	0.57	NA	NA	Mendonca et al., 2017	Ray et al., in Review; Anderson et al., 2020; Amora Noguera 2022
397	Long Lake Minnesota H	Lake	United States of America	45.3258	-94.87	23	1.25313	13.7	NA	Mendonca et al., 2017	Ray et al., in Review; Anderson et al., 2020; Amora Noguera 2022
398	Long Lake Minnesota LI	Lake	United States of America	47.2756	-95.2969	22.8554	0.6	NA	NA	Anderson et al., 2020	Ray et al., in Review; Anderson et al., 2020; Amora Noguera 2022
399	Long Lake Minnesota NI	Lake	United States of America	47.6616	-93.4008	33.8992	0.311	NA	NA	Anderson et al., 2020	Ray et al., in Review; Anderson et al., 2020; Amora Noguera 2022
400	Longgan	Lake	China	29.9435	116.174	14	316	5	4	Wang et al., 2018	Ray et al., in Review; Anderson et al., 2020; Amora Noguera 2022
401	Longjiang Lake	Lake	China	46.856	123.147	99.34	13.3	NA	2.2	Bao et al., 2021	Ray et al., in Review; Anderson et al., 2020; Amora Noguera 2022
402	Loon Lake Minnesota C	Lake	United States of America	47.2324	-93.6405	36.6229	0.951	NA	NA	Anderson et al., 2020	Ray et al., in Review; Anderson et al., 2020; Amora Noguera 2022
403	Loon Lake Minnesota T	Lake	United States of America	45.1135	-92.8367	181.731	0.139	NA	NA	Anderson et al., 2020	Ray et al., in Review; Anderson et al., 2020; Amora Noguera 2022
355	Lost Island Lake	Lake	United States of America	43.1699	-94.9014	62.4058	4.7	NA	NA	Anderson et al., 2020	Ray et al., in Review; Anderson et al., 2020; Amora Noguera 2022
404	Lotus Lake	Lake	United States of America	44.8719	-93.5278	137.421	0.974	NA	NA	Anderson et al., 2020	Ray et al., in Review; Anderson et al., 2020; Amora Noguera 2022
68	Lough Brantry	Lake	United Kingdom	54.254	-6.505	119.539	0.75	11	NA	Anderson et al., 2020	Ray et al., in Review; Anderson et al., 2020; Amora Noguera 2022
410	Lough Patrick	Lake	United Kingdom	54.1	-6.4	32.2	0.24	20	NA	Mendonca et al., 2017	Ray et al., in Review; Anderson et al., 2020; Amora Noguera 2022
352	Lower Gar Lake	Lake	United States of America	43.3542	-95.1217	108.01	1	NA	NA	Anderson et al., 2020	Ray et al., in Review; Anderson et al., 2020; Amora Noguera 2022
412	Lower Prior Lake	Lake	United States of America	44.7347	-93.4167	189.886	3.48	NA	NA	Anderson et al., 2020	Ray et al., in Review; Anderson et al., 2020; Amora Noguera 2022
413	Loweswater	Lake	United Kingdom	54.5864	-3.36181	25.9752	0.64	16	NA	Anderson et al., 2020	Ray et al., in Review; Anderson et al., 2020; Amora Noguera 2022
414	Lugano	Lake	Switzerland	45.9927	8.9809	31	48.7	266	NA	Mendonca et al., 2017	Ray et al., in Review; Anderson et al., 2020; Amora Noguera 2022
415	Lugu Lake	Lake	China	27.6997	100.786	13.5333	49.5	94	40	Lin et al., 202120222018	Ray et al., in Review; Anderson et al., 2020; Amora Noguera 2022
416	Lura Lake	Lake	United States of America	43.8778	-94.0172	72.9794	5.3489	2.8	NA	Anderson et al., 2020	Ray et al., in Review; Anderson et al., 2020; Amora Noguera 2022
417	Maam Maam3	Lake	Ireland	54.98	-8.11	38.556	NA	NA	NA	Anderson et al., 2020	Ray et al., in Review; Anderson et al., 2020; Amora Noguera 2022
418	Maarseveense Plassen	Lake	Netherlands	52.141	5.08799	4.4	0.7	32	NA	Mendonca et al., 2017	Ray et al., in Review; Anderson et al., 2020; Amora Noguera 2022
419	MacNean Upper	Lake	United Kingdom	54.17	-7.55	218.113	10.1	24	NA	Anderson et al., 2020	Ray et al., in Review; Anderson et al., 2020; Amora Noguera 2022
420	Madison Lake	Lake	United States of America	44.1884	-93.8122	319.8	5.4	NA	NA	Anderson et al., 2020	Ray et al., in Review; Anderson et al., 2020; Amora Noguera 2022
421	Mafura	Lake	Uganda	-0.26475	30.1017	8.45842	0.191	NA	NA	Anderson et al., 2020	Ray et al., in Review; Anderson et al., 2020; Amora Noguera 2022
422	Mahoma	Lake	Uganda	0.344383	29.9671	32.5486	4.76	25	NA	Anderson et al., 2020	Ray et al., in Review; Anderson et al., 2020; Amora Noguera 2022
423	Malachy Lake	Lake	United States of America	45.368	-95.6809	105.274	0.166	1.1	NA	Anderson et al., 2020	Ray et al., in Review; Anderson et al., 2020; Amora Noguera 2022
424	Manitou	Lake	United States of America	45.1269	-86.0237	53.1447	1.046	NA	NA	Anderson et al., 2020	Ray et al., in Review; Anderson et al., 2020; Amora Noguera 2022
425	Manor House Lower Lough Erne	Lake	United Kingdom	54.4231	-7.70027	426.002	103	25	NA	Anderson et al., 2020	Ray et al., in Review; Anderson et al., 2020; Amora Noguera 2022
426	Mariut	Lake	Egypt	31.1464	29.8962	80.8	63	NA	0.85	Eid et al., 2017	Ray et al., in Review; Anderson et al., 2020; Amora Noguera 2022
427	Marmara	Lake	Turkey	38.6087	27.9813	64.4018	34.3	5	NA	Anderson et al., 2020	Ray et al., in Review; Anderson et al., 2020; Amora Noguera 2022
428	Marsworth Reservoir	Lake	United Kingdom	51.8144	-0.664962	103.1	0.1	4	NA	Anderson et al., 2020	Ray et al., in Review; Anderson et al., 2020; Amora Noguera 2022
429	Maude Lake	Lake	United States of America	48.1092	-92.3529	21.1949	0.42	NA	NA	Anderson et al., 2020	Ray et al., in Review; Anderson et al., 2020; Amora Noguera 2022
430	McCarrons Lake	Lake	United States of America	44.9976	-93.1136	63	0.284	NA	NA	Anderson et al., 2020	Ray et al., in Review; Anderson et al., 2020; Amora Noguera 2022
431	Meander Lake	Lake	United States of America	46.7785	-92.9119	20.7642	0.14	NA	NA	Anderson et al., 2020	Ray et al., in Review; Anderson et al., 2020; Amora Noguera 2022
432	Melvin	Lake	Ireland	54.25	-8.08	30.772	24	45	NA	Anderson et al., 2020	Ray et al., in Review; Anderson et al., 2020; Amora Noguera 2022
433	Michigan	Lake	United States of America	44	-87	2.6	58000	282	85	Mendonca et al., 2017	Ray et al., in Review; Anderson et al., 2020; Amora Noguera 2022
434	Middle Twin Lake	Lake	United States of America	45.0435	-93.3404	149.196	0.226	NA	NA	Anderson et al., 2020	Ray et al., in Review; Anderson et al., 2020; Amora Noguera 2022
435	Mill Loch	Lake	United Kingdom	55.135	-3.449	113.057	0.11	16.8	NA	Anderson et al., 2020	Ray et al., in Review; Anderson et al., 2020; Amora Noguera 2022
436	Mille Lacs	Lake	United States of America	46.2185	-93.6637	29.9261	514.53	13	NA	Anderson et al., 2020	Ray et al., in Review; Anderson et al., 2020; Amora Noguera 2022
437	Miller Lake Minnesota D	Lake	United States of America	44.7848	-93.7403	299.959	0.561	NA	NA	Anderson et al., 2020	Ray et al., in Review; Anderson et al., 2020; Amora Noguera 2022
438	Minipi	Lake	Canada	52.6679	-61.7243	0.746	52	NA	NA	Anderson et al., 2020	Ray et al., in Review; Anderson et al., 2020; Amora Noguera 2022
439	Miniques	Lake	Chile	-23.7666	-67.7894	16.5911	1.3	NA	NA	Anderson et al., 2020	Ray et al., in Review; Anderson et al., 2020; Amora Noguera 2022
440	Miragoane	Lake	Haiti	18.401	-73.0531	21.2559	7.06	41	25.9	Brenner 1999 (from Amora Noguera 2022)	Ray et al., in Review; Anderson et al., 2020; Amora Noguera 2022
441	Miscanti	Lake	Chile	-23.7257	-67.7708	25.7296	12.85	9	NA	Anderson et al., 2020	Ray et al., in Review; Anderson et al., 2020; Amora Noguera 2022
442	Mitchell Lake	Lake	United States of America	44.86	-93.4972	121.311	0.427	NA	NA	Anderson et al., 2020	Ray et al., in Review; Anderson et al., 2020; Amora Noguera 2022
443	Mitrofanovskoe	Lake	Russia	67.2904	57.1809	25.3513	0.309	20	6.1	Anderson et al., 2020	Ray et al., in Review; Anderson et al., 2020; Amora Noguera 2022
444	Morrison	Lake	United States of America	46.1311	-95.893	93	0.120599	2.5	NA	Mendonca et al., 2017	Ray et al., in Review; Anderson et al., 2020; Amora Noguera 2022
445	Morse Lake	Lake	United States of America	42.8388	-93.6932	47.7467	0.4	NA	NA	Anderson et al., 2020	Ray et al., in Review; Anderson et al., 2020; Amora Noguera 2022
446	Mountain Lake	Lake	United States of America	45.5413	-95.5216	59.7191	0.142	NA	NA	Anderson et al., 2020	Ray et al., in Review; Anderson et al., 2020; Amora Noguera 2022
447	Mukooda	Lake	United States of America	48.3337	-92.4903	17.8905	3.1	23.8	12.2	Anderson et al., 2020	Ray et al., in Review; Anderson et al., 2020; Amora Noguera 2022
448	Mussurá	Lake	Brazil	-1.4723	-56.3074	81.52	5.2	NA	NA	Mendonca et al., 2017	Ray et al., in Review; Anderson et al., 2020; Amora Noguera 2022
449	Naivasha	Lake	Kenya	-0.784825	36.3249	37	135	16	8	Mendonca et al., 2017	Ray et al., in Review; Anderson et al., 2020; Amora Noguera 2022
450	Nakuru	Lake	Kenya	-0.348107	36.0866	95.1858	26	NA	1.5	Anderson et al., 2020	Ray et al., in Review; Anderson et al., 2020; Amora Noguera 2022
451	Nam Co	Lake	China	30.7701	90.9286	15.0339	1961	95	24	Wang et al., 2018	Ray et al., in Review; Anderson et al., 2020; Amora Noguera 2022
452	Namakan	Lake	United States of America	48.4353	-92.5836	29.2619	102	45.7	13.6	Anderson et al., 2020	Ray et al., in Review; Anderson et al., 2020; Amora Noguera 2022
453	Nanita	Lake	United States of America	40.2558	-105.716	8.14066	0.133613	25	NA	Mendonca et al., 2017	Ray et al., in Review; Anderson et al., 2020; Amora Noguera 2022
454	Nanshan Lake	Lake	China	46.8678	123.916	50.37	18.2	NA	2.5	Bao et al., 2021	Ray et al., in Review; Anderson et al., 2020; Amora Noguera 2022
455	Nanyi Lake	Lake	China	31.0975	118.972	19.95	148	3	2	Wang et al., 2018	Ray et al., in Review; Anderson et al., 2020; Amora Noguera 2022
456	Natel	Lake	Canada	52.1847	-75.7119	7.17038	3.87	25.8	4.6	Anderson et al., 2020	Ray et al., in Review; Anderson et al., 2020; Amora Noguera 2022
457	Nazare	Lake	Brazil	-8.15029	-63.3348	57.4056	0.47	NA	NA	Anderson et al., 2020	Ray et al., in Review; Anderson et al., 2020; Amora Noguera 2022
458	Nelson Lake	Lake	United States of America	45.5239	-95.4462	79.0722	1.104	3.9	NA	Anderson et al., 2020	Ray et al., in Review; Anderson et al., 2020; Amora Noguera 2022
459	Ninemile	Lake	United States of America	47.5794	-91.0833	60.5421	1.17	NA	NA	Anderson et al., 2020	Ray et al., in Review; Anderson et al., 2020; Amora Noguera 2022
460	Nipisiquit	Lake	United States of America	47.3556	-91.2474	30.472	0.226	5.5	NA	Anderson et al., 2020	Ray et al., in Review; Anderson et al., 2020; Amora Noguera 2022
461	Nir'pa Co	Lake	China	29.44	92.23	0.01	0.1	NA	NA	Wang et al., 2018	Ray et al., in Review; Anderson et al., 2020; Amora Noguera 2022
462	North Twin Lake	Lake	United States of America	42.485	-94.6275	92.3832	1.8	NA	NA	Anderson et al., 2020	Ray et al., in Review; Anderson et al., 2020; Amora Noguera 2022
463	Nowe Wloki	Lake	Poland	53.8994	20.5283	196	0.198	2.7	NA	Skwierawski, 2022	Ray et al., in Review; Anderson et al., 2020; Amora Noguera 2022
464	Nyamogusingiri Crater	Lake	Uganda	-0.284583	30.013	117.273	4.3	12.5	NA	Anderson et al., 2020	Ray et al., in Review; Anderson et al., 2020; Amora Noguera 2022
465	Nyungu	Lake	Uganda	-0.257298	30.0941	330.015	0.209	NA	NA	Anderson et al., 2020	Ray et al., in Review; Anderson et al., 2020; Amora Noguera 2022
466	Oak Lake	Lake	United States of America	44.5367	-96.2435	68.7576	0.288	3	NA	Anderson et al., 2020	Ray et al., in Review; Anderson et al., 2020; Amora Noguera 2022
467	Ohlsrud Lake	Lake	United States of America	45.7989	-96.0493	84.2031	0.807	NA	NA	Anderson et al., 2020	Ray et al., in Review; Anderson et al., 2020; Amora Noguera 2022
469	Okamanpeedan Lake	Lake	United States of America	43.4967	-94.5936	69.8147	9.2	NA	NA	Anderson et al., 2020	Ray et al., in Review; Anderson et al., 2020; Amora Noguera 2022
470	Okareka	Lake	New Zealand	-38.1679	176.358	1.80165	3.3	33.5	20	Santoso et al., 2017	Ray et al., in Review; Anderson et al., 2020; Amora Noguera 2022
471	Okaro	Lake	New Zealand	-38.2975	176.394	0.12011	0.3	18	12.5	Santoso et al., 2017	Ray et al., in Review; Anderson et al., 2020; Amora Noguera 2022
472	Okataina	Lake	New Zealand	-38.1258	176.412	1.32121	10.8	78.5	39.4	Santoso et al., 2017	Ray et al., in Review; Anderson et al., 2020; Amora Noguera 2022
473	Oldman	Lake	United States of America	48.5115	-113.461	5.31984	0.17793	17	7	Mendonca et al., 2017	Ray et al., in Review; Anderson et al., 2020; Amora Noguera 2022
474	Ontario	Lake	Canada	43.7	-77.9	58	19000	245	86	Mendonca et al., 2017	Ray et al., in Review; Anderson et al., 2020; Amora Noguera 2022
475	Opeongo	Lake	Canada	45.718	-78.3608	9.036	5.8	49.4	14.6	Anderson et al., 2020	Ray et al., in Review; Anderson et al., 2020; Amora Noguera 2022
476	Oughter	Lake	Ireland	54.01	-8.25	394.607	13	10	NA	Anderson et al., 2020	Ray et al., in Review; Anderson et al., 2020; Amora Noguera 2022
477	Outer	Lake	United States of America	47.0075	-90.4597	103.908	0.194188	0.8	NA	Anderson et al., 2020	Ray et al., in Review; Anderson et al., 2020; Amora Noguera 2022
478	Ovre Neadalsvatn OVNE4	Lake	Norway	62.775	9	1.04321	0.49	NA	NA	Anderson et al., 2020	Ray et al., in Review; Anderson et al., 2020; Amora Noguera 2022
479	PA10 (Pacoval)	Lake	Brazil	-2.44435	-54.0904	308.916	NA	NA	NA	Amora-Nogueira et al., 2022	Ray et al., in Review; Anderson et al., 2020; Amora Noguera 2022
480	PA9 (Verde)	Lake	Brazil	-2.49464	-54.9469	109.639	4.913	NA	NA	Amora-Nogueira et al., 2022	Ray et al., in Review; Anderson et al., 2020; Amora Noguera 2022
481	Paca	Lake	Brazil	-8.57628	-63.4864	124.276	NA	NA	NA	Amora-Nogueira et al., 2022	Ray et al., in Review; Anderson et al., 2020; Amora Noguera 2022
482	Pallette Lake	Lake	United States of America	46.0659	-89.6024	16.8545	0.730132	18.29	10.06	Mendonca et al., 2017	Ray et al., in Review; Anderson et al., 2020; Amora Noguera 2022
483	Peary Lake	Lake	United States of America	48.5261	-92.7708	14.1003	0.444	4.6	NA	Anderson et al., 2020	Ray et al., in Review; Anderson et al., 2020; Amora Noguera 2022
484	Peku Co	Lake	China	28.8635	85.6204	4	284	70	16	Wang et al., 2018	Ray et al., in Review; Anderson et al., 2020; Amora Noguera 2022
485	Peltier Lake	Lake	United States of America	45.1795	-93.0565	298.783	2.179	NA	NA	Anderson et al., 2020	Ray et al., in Review; Anderson et al., 2020; Amora Noguera 2022
486	Perch Lake	Lake	United States of America	46.6888	-92.6694	90.3857	2.631	NA	NA	Anderson et al., 2020	Ray et al., in Review; Anderson et al., 2020; Amora Noguera 2022
487	Pickerel Lake	Lake	United States of America	42.9055	-94.9219	127.045	0.7	NA	NA	Anderson et al., 2020	Ray et al., in Review; Anderson et al., 2020; Amora Noguera 2022
488	Pitoney	Lake	Canada	53.6303	-122.033	10.4108	1.76	19.8	8.5	Anderson et al., 2020	Ray et al., in Review; Anderson et al., 2020; Amora Noguera 2022
489	Ponte Tresa Basin	Lake	Switzerland	45.9666	8.8666	280.5	1.1	62	NA	Mendonca et al., 2017	Ray et al., in Review; Anderson et al., 2020; Amora Noguera 2022
490	Portage Lake	Lake	United States of America	46.9651	-95.1164	69.6584	1.571	NA	NA	Anderson et al., 2020	Ray et al., in Review; Anderson et al., 2020; Amora Noguera 2022
491	Poyang	Lake	China	29.119	116.3	16	2933	29	5	Wang et al., 2018	Ray et al., in Review; Anderson et al., 2020; Amora Noguera 2022
492	Pumyum Co	Lake	China	28.5629	90.4072	3	290	65	46	Wang et al., 2018	Ray et al., in Review; Anderson et al., 2020; Amora Noguera 2022
493	Pupunha	Lake	Brazil	-7.4644	-62.9458	58.3635	4.923	NA	NA	Amora-Nogueira et al., 2022	Ray et al., in Review; Anderson et al., 2020; Amora Noguera 2022
494	Puruzinho	Lake	Brazil	-7.36924	-63.0581	76.9543	5.794	NA	NA	Amora-Nogueira et al., 2022	Ray et al., in Review; Anderson et al., 2020; Amora Noguera 2022
495	Q27	Lake	Canada	53.5072	-77.6986	10.72	NA	NA	NA	Anderson et al., 2020	Ray et al., in Review; Anderson et al., 2020; Amora Noguera 2022
496	Q6	Lake	Canada	51.1156	-77.3262	11.88	NA	NA	NA	Anderson et al., 2020	Ray et al., in Review; Anderson et al., 2020; Amora Noguera 2022
497	Qijipaoa Lake	Lake	China	46.8227	124.302	80.69	11.4	NA	2.1	Bao et al., 2021	Ray et al., in Review; Anderson et al., 2020; Amora Noguera 2022
498	Qiluhu	Lake	China	24.1674	102.771	64	37	15	4	Wang et al., 2018	Ray et al., in Review; Anderson et al., 2020; Amora Noguera 2022
499	Qinghai Lake	Lake	China	36.7165	100.253	10.763	4340	32.8	18	Wang et al., 2018	Ray et al., in Review; Anderson et al., 2020; Amora Noguera 2022
500	Qionghai	Lake	China	27.82	102.31	7	31	NA	10	Wang et al., 2018	Ray et al., in Review; Anderson et al., 2020; Amora Noguera 2022
501	Rainbow Lake	Lake	United States of America	45.0222	-110.74	75.6559	2.3	2.6	1.4	Anderson et al., 2020	Ray et al., in Review; Anderson et al., 2020; Amora Noguera 2022
502	Rainy Lake	Lake	Canada	48.6244	-93.0117	14.4446	932	50	NA	Anderson et al., 2020	Ray et al., in Review; Anderson et al., 2020; Amora Noguera 2022
503	Ravnso	Lake	Denmark	56.1063	9.84526	152.575	1.82	33	NA	Anderson et al., 2020	Ray et al., in Review; Anderson et al., 2020; Amora Noguera 2022
504	Redrock	Lake	United States of America	48.7958	-113.706	19.2748	0.108218	6.1	NA	Mendonca et al., 2017	Ray et al., in Review; Anderson et al., 2020; Amora Noguera 2022
505	Reis	Lake	Brazil	-7.50256	-62.908	97.284	20.418	NA	NA	Amora-Nogueira et al., 2022	Ray et al., in Review; Anderson et al., 2020; Amora Noguera 2022
506	Rerewhakaaitu	Lake	New Zealand	-38.2957	176.501	1.08099	5.8	15.8	7	Santoso et al., 2017	Ray et al., in Review; Anderson et al., 2020; Amora Noguera 2022
507	Rice Lake	Lake	United States of America	43.3909	-93.5009	54.2629	4	NA	NA	Anderson et al., 2020	Ray et al., in Review; Anderson et al., 2020; Amora Noguera 2022
508	Rice Marsh Lake	Lake	United States of America	44.8511	-93.5174	438.82	0.326	NA	NA	Anderson et al., 2020	Ray et al., in Review; Anderson et al., 2020; Amora Noguera 2022
509	Rice Portage Lake	Lake	United States of America	46.6986	-92.6895	59.2472	0.453	NA	NA	Anderson et al., 2020	Ray et al., in Review; Anderson et al., 2020; Amora Noguera 2022
510	Richardson Lake	Lake	United States of America	45.1573	-94.4403	295.809	0.467	14.3	NA	Anderson et al., 2020	Ray et al., in Review; Anderson et al., 2020; Amora Noguera 2022
511	Richie	Lake	United States of America	48.0409	-88.7024	41.2106	1.888	NA	NA	Anderson et al., 2020	Ray et al., in Review; Anderson et al., 2020; Amora Noguera 2022
512	Rollesby Broad	Lake	United Kingdom	52.677	1.64	89.8113	0.73	2.5	NA	Anderson et al., 2020	Ray et al., in Review; Anderson et al., 2020; Amora Noguera 2022
513	Rostherne Mere	Lake	United Kingdom	53.3438	-2.39345	100.5	0.4935	30.5	13.8	Radbourne et al., 20172018	Ray et al., in Review; Anderson et al., 2020; Amora Noguera 2022
514	Rotoehu	Lake	New Zealand	-38.0232	176.53	2.16198	8.1	13.5	8.2	Santoso et al., 2017	Ray et al., in Review; Anderson et al., 2020; Amora Noguera 2022
515	Rotoiti	Lake	New Zealand	-38.042	176.348	1.44132	34.6	124	31.5	Santoso et al., 2017	Ray et al., in Review; Anderson et al., 2020; Amora Noguera 2022
516	Rotoma	Lake	New Zealand	-38.0533	176.589	2.16198	11.2	83	36.9	Santoso et al., 2017	Ray et al., in Review; Anderson et al., 2020; Amora Noguera 2022
517	Rotomahana	Lake	New Zealand	-38.2631	176.437	0.60055	9	125	60	Santoso et al., 2017	Ray et al., in Review; Anderson et al., 2020; Amora Noguera 2022
518	Rotorua	Lake	New Zealand	-38.0849	176.264	2.28209	80.8	44.8	11	Santoso et al., 2017	Ray et al., in Review; Anderson et al., 2020; Amora Noguera 2022
519	Rotsee	Lake	Switzerland	47.0717	8.31801	145.3	0.5	16	NA	Mendonca et al., 2017	Ray et al., in Review; Anderson et al., 2020; Amora Noguera 2022
520	Round Lake Minnesota CF	Lake	United States of America	45.5597	-95.2783	131.298	0.798	3.5	NA	Anderson et al., 2020	Ray et al., in Review; Anderson et al., 2020; Amora Noguera 2022
521	Round Lake Minnesota EF	Lake	United States of America	47.8762	-93.5141	41.2887	0.206	NA	NA	Anderson et al., 2020	Ray et al., in Review; Anderson et al., 2020; Amora Noguera 2022
522	Round Lake Minnesota EP	Lake	United States of America	44.868	-93.493	147.545	0.112	NA	NA	Anderson et al., 2020	Ray et al., in Review; Anderson et al., 2020; Amora Noguera 2022
523	Round Lake Minnesota TL	Lake	United States of America	47.2135	-93.3584	69.055	0.396393	4.9	NA	Mendonca et al., 2017	Ray et al., in Review; Anderson et al., 2020; Amora Noguera 2022
524	Round Lake Minnesota VT	Lake	United States of America	45.0079	-94.0251	625.801	0.18	NA	NA	Anderson et al., 2020	Ray et al., in Review; Anderson et al., 2020; Amora Noguera 2022
525	Rutundu	Lake	Kenya	-0.041538	37.4633	27.2789	0.101	NA	NA	Anderson et al., 2020	Ray et al., in Review; Anderson et al., 2020; Amora Noguera 2022
526	Ryan Lake	Lake	United States of America	48.5193	-92.7074	23.1209	0.142	5.2	NA	Anderson et al., 2020	Ray et al., in Review; Anderson et al., 2020; Amora Noguera 2022
527	Sailimuhu	Lake	China	44.591	81.173	3	458	92	46	Wang et al., 2018	Ray et al., in Review; Anderson et al., 2020; Amora Noguera 2022
528	Samuel	Lake	Brazil	-8.74837	-63.4042	134.556	450	NA	NA	Anderson et al., 2020	Ray et al., in Review; Anderson et al., 2020; Amora Noguera 2022
529	Santa Catarina	Lake	Brazil	-8.26533	-63.2042	661.7	2.515	NA	NA	Amora-Nogueira et al., 2022	Ray et al., in Review; Anderson et al., 2020; Amora Noguera 2022
530	Sawag C	Lake	Poland	53.977	20.314	345	0.154	3.5	NA	Skwierawski, 2022	Ray et al., in Review; Anderson et al., 2020; Amora Noguera 2022
531	Sawag N	Lake	Poland	53.9844	20.329	379	0.532	4	NA	Skwierawski, 2022	Ray et al., in Review; Anderson et al., 2020; Amora Noguera 2022
532	Sawag S	Lake	Poland	53.9708	20.313	226	0.334	3.5	NA	Skwierawski, 2022	Ray et al., in Review; Anderson et al., 2020; Amora Noguera 2022
533	Sawbill Lake	Lake	United States of America	47.528	-90.8802	31.2614	2.44	NA	NA	Anderson et al., 2020	Ray et al., in Review; Anderson et al., 2020; Amora Noguera 2022
534	Secord	Lake	Canada	53.6284	-124.337	6.43832	0.4	8	2.5	Anderson et al., 2020	Ray et al., in Review; Anderson et al., 2020; Amora Noguera 2022
535	Setalskie Male	Lake	Poland	53.9114	20.4803	215	0.125	2.6	NA	Skwierawski, 2022	Ray et al., in Review; Anderson et al., 2020; Amora Noguera 2022
536	Shallow Lake	Lake	United States of America	47.1243	-93.2993	41.04	2.15	NA	NA	Anderson et al., 2020	Ray et al., in Review; Anderson et al., 2020; Amora Noguera 2022
537	Shell Lake	Lake	United States of America	44.9474	-85.8994	34.6727	0.16	4	NA	Anderson et al., 2020	Ray et al., in Review; Anderson et al., 2020; Amora Noguera 2022
538	Shijiuhu	Lake	China	31.4565	118.836	26.2	210	5	4	Wang et al., 2018	Ray et al., in Review; Anderson et al., 2020; Amora Noguera 2022
539	Shingobee Lake	Lake	United States of America	47.0028	-94.6888	42.5968	0.671	NA	NA	Anderson et al., 2020	Ray et al., in Review; Anderson et al., 2020; Amora Noguera 2022
540	Shitang	Lake	China	30.6155	117.104	15	23	NA	2	Wang et al., 2018	Ray et al., in Review; Anderson et al., 2020; Amora Noguera 2022
541	Shoepack	Lake	United States of America	48.5031	-92.8802	37.1516	1.18	NA	NA	Anderson et al., 2020	Ray et al., in Review; Anderson et al., 2020; Amora Noguera 2022
542	Shuanghaizi	Lake	China	39.37	102.29	6	1	7	NA	Wang et al., 2018	Ray et al., in Review; Anderson et al., 2020; Amora Noguera 2022
543	Side Lake	Lake	United States of America	47.6708	-93.0182	38.3442	1.45	NA	NA	Anderson et al., 2020	Ray et al., in Review; Anderson et al., 2020; Amora Noguera 2022
544	Sihailongwang	Lake	China	42.287	126.6	13	1	50	NA	Wang et al., 2018	Ray et al., in Review; Anderson et al., 2020; Amora Noguera 2022
545	Silver Lake FL	Lake	United States of America	30.4043	-84.4047	64	0.1	NA	2.4	Waters et al., 2019	Ray et al., in Review; Anderson et al., 2020; Amora Noguera 2022
546	Silver Lake Iowa A	Lake	United States of America	43.0336	-94.8905	100.152	2.6	NA	NA	Anderson et al., 2020	Ray et al., in Review; Anderson et al., 2020; Amora Noguera 2022
547	Silver Lake Iowa LP	Lake	United States of America	43.4454	-95.3366	54.3955	4.2	NA	NA	Anderson et al., 2020	Ray et al., in Review; Anderson et al., 2020; Amora Noguera 2022
548	Simbi	Lake	Kenya	-0.368361	34.6295	40.087	0.296	NA	NA	Anderson et al., 2020	Ray et al., in Review; Anderson et al., 2020; Amora Noguera 2022
549	Simoncouche	Lake	Canada	48.24	-71.2532	24.3044	57	NA	NA	Anderson et al., 2020	Ray et al., in Review; Anderson et al., 2020; Amora Noguera 2022
550	Siseebakwet Lake	Lake	United States of America	47.1588	-93.6714	34.1838	5	32	NA	Anderson et al., 2020	Ray et al., in Review; Anderson et al., 2020; Amora Noguera 2022
551	Siskwit Lake	Lake	United States of America	47.9992	-88.8001	9.087	16.8	4	NA	Anderson et al., 2020	Ray et al., in Review; Anderson et al., 2020; Amora Noguera 2022
552	Skanderborg	Lake	Denmark	56.0167	9.91667	180.272	7.32	18.8	NA	Anderson et al., 2020	Ray et al., in Review; Anderson et al., 2020; Amora Noguera 2022
553	Slapton Ley	Lake	United Kingdom	50.277	-3.652	96.9009	0.66	3	NA	Anderson et al., 2020	Ray et al., in Review; Anderson et al., 2020; Amora Noguera 2022
554	Slide	Lake	United States of America	45.004	-110.699	81.9156	3	4.5	2.8	Anderson et al., 2020	Ray et al., in Review; Anderson et al., 2020; Amora Noguera 2022
555	Slough_YS	Lake	United States of America	44.9258	-110.352	34.1432	2.1	8	4	Anderson et al., 2020	Ray et al., in Review; Anderson et al., 2020; Amora Noguera 2022
556	Smith Lake	Lake	United States of America	45.079	-94.1262	132	0.736616	1.3	NA	Mendonca et al., 2017	Ray et al., in Review; Anderson et al., 2020; Amora Noguera 2022
557	Sogaard	Lake	Denmark	54.9361	9.43932	197.665	0.583	5	NA	Anderson et al., 2020	Ray et al., in Review; Anderson et al., 2020; Amora Noguera 2022
558	Solem Lake	Lake	United States of America	45.8092	-95.6397	71.3829	0.149	3.7	NA	Anderson et al., 2020	Ray et al., in Review; Anderson et al., 2020; Amora Noguera 2022
559	Sonachi	Lake	Kenya	-0.782856	36.2621	9	0.14	NA	NA	Mendonca et al., 2017	Ray et al., in Review; Anderson et al., 2020; Amora Noguera 2022
560	Soppensee	Lake	Switzerland	47.09	8.08	84.1	0.23	26.5	NA	Anderson et al., 2020	Ray et al., in Review; Anderson et al., 2020; Amora Noguera 2022
561	South Center Lake	Lake	United States of America	45.3757	-92.8284	71.0994	3.521	NA	NA	Anderson et al., 2020	Ray et al., in Review; Anderson et al., 2020; Amora Noguera 2022
562	South Heron	Lake	United States of America	43.7192	-95.2289	135.849	10.27	NA	NA	Anderson et al., 2020	Ray et al., in Review; Anderson et al., 2020; Amora Noguera 2022
563	South Twin Lake	Lake	United States of America	47.2288	-95.6472	56.4506	4.3	NA	NA	Anderson et al., 2020	Ray et al., in Review; Anderson et al., 2020; Amora Noguera 2022
564	Speckled Trout Lake	Lake	United States of America	47.95	-89.8463	43.8407	0.263	6.4	NA	Anderson et al., 2020	Ray et al., in Review; Anderson et al., 2020; Amora Noguera 2022
565	Spectacle Lake	Lake	United States of America	45.5757	-93.4058	62.2598	0.958	NA	NA	Anderson et al., 2020	Ray et al., in Review; Anderson et al., 2020; Amora Noguera 2022
566	Spring Lake Minnesota PL	Lake	United States of America	44.7014	-93.4725	53.56	2.38	NA	NA	Mendonca et al., 2017	Ray et al., in Review; Anderson et al., 2020; Amora Noguera 2022
567	Spring Lake Minnesota SL	Lake	United States of America	47.6486	-93.8658	22.1425	0.51	NA	NA	Anderson et al., 2020	Ray et al., in Review; Anderson et al., 2020; Amora Noguera 2022
568	Square Lake	Lake	United States of America	45.1549	-92.8007	24.4519	0.795	NA	NA	Anderson et al., 2020	Ray et al., in Review; Anderson et al., 2020; Amora Noguera 2022
569	SS1	Lake	Greenland	66.9849	-50.9251	13.4	0.353	6	NA	Mendonca et al., 2017	Ray et al., in Review; Anderson et al., 2020; Amora Noguera 2022
570	SS2	Lake	Greenland	67	-50.97	7.41764	0.368	11.2	NA	Anderson et al., 2019	Ray et al., in Review; Anderson et al., 2020; Amora Noguera 2022
571	SS32	Lake	Greenland	66.97	-49.8	5.402	0.163	21	NA	Anderson et al., 2019	Ray et al., in Review; Anderson et al., 2020; Amora Noguera 2022
572	SS4	Lake	Greenland	66.9882	-51.0401	4.33	0.73	23	NA	Anderson et al., 2019	Ray et al., in Review; Anderson et al., 2020; Amora Noguera 2022
573	SS49	Lake	Greenland	66.86	-52.66	2.37062	0.207	10.5	NA	Anderson et al., 2019	Ray et al., in Review; Anderson et al., 2020; Amora Noguera 2022
574	SS6	Lake	Russia	67	51.11	6.6	0.215	12.8	NA	Anderson et al., 2019	Ray et al., in Review; Anderson et al., 2020; Amora Noguera 2022
575	SS70	Lake	Greenland	66.95	-51.58	9.52	0.766	47	NA	Anderson et al., 2019	Ray et al., in Review; Anderson et al., 2020; Amora Noguera 2022
576	SS8	Lake	Greenland	67.0146	-51.0753	5.88	0.151248	9	NA	Mendonca et al., 2017	Ray et al., in Review; Anderson et al., 2020; Amora Noguera 2022
577	SS901	Lake	Greenland	67.13	-50.23	3.02	0.12	NA	NA	Anderson et al., 2019	Ray et al., in Review; Anderson et al., 2020; Amora Noguera 2022
578	SS902	Lake	Greenland	67.1314	-50.2347	4.55	0.12	14	NA	Mendonca et al., 2017	Ray et al., in Review; Anderson et al., 2020; Amora Noguera 2022
579	SS903 (Two-Boat Lake)	Lake	Greenland	67.1281	-50.1741	4.24	0.365	27.95	11.3	Lindborg et al., 2020	Ray et al., in Review; Anderson et al., 2020; Amora Noguera 2022
580	SS904	Lake	Greenland	67.16	-50.28	1.4	0.124	11.4	NA	Anderson et al., 2019	Ray et al., in Review; Anderson et al., 2020; Amora Noguera 2022
581	St Louis Estuary (Allouez Bay)	Lake	United States of America	46.6896	-92.0033	76.4574	5.235	NA	NA	Anderson et al., 2020	Ray et al., in Review; Anderson et al., 2020; Amora Noguera 2022
582	St Louis Estuary (Superior Bay)	Lake	United States of America	46.7497	-92.0796	15.7772	12.729	NA	NA	Anderson et al., 2020	Ray et al., in Review; Anderson et al., 2020; Amora Noguera 2022
583	St.Moritzersee	Lake	Switzerland	46.4936	9.84589	216.4	0.78	44	NA	Mendonca et al., 2017	Ray et al., in Review; Anderson et al., 2020; Amora Noguera 2022
584	Stahl Lake	Lake	United States of America	44.9534	-94.4226	183.04	0.568	11.3	NA	Anderson et al., 2020	Ray et al., in Review; Anderson et al., 2020; Amora Noguera 2022
585	Startopsend Reservoir (Grand Union Canal)	Lake	United Kingdom	51.814	-0.667	427.41	0.1	4	NA	Anderson et al., 2020	Ray et al., in Review; Anderson et al., 2020; Amora Noguera 2022
586	Steep Bank	Lake	United States of America	44.5382	-96.3282	109.865	0.794	1.7	NA	Anderson et al., 2020	Ray et al., in Review; Anderson et al., 2020; Amora Noguera 2022
587	Stukely	Lake	Canada	45.3638	-72.2531	21.1029	3.794	NA	NA	Anderson et al., 2020	Ray et al., in Review; Anderson et al., 2020; Amora Noguera 2022
588	Sugan	Lake	China	38.86	93.87	12	106	5	3	Wang et al., 2018	Ray et al., in Review; Anderson et al., 2020; Amora Noguera 2022
589	Sulivan N Lake	Lake	Falkland Is.	-51.5066	-60.1188	46.1688	500	2.3	NA	Anderson et al., 2020	Ray et al., in Review; Anderson et al., 2020; Amora Noguera 2022
590	Swamp Lake	Lake	United States of America	47.9513	-89.8581	33.8512	1.43	5.8	NA	Anderson et al., 2020	Ray et al., in Review; Anderson et al., 2020; Amora Noguera 2022
591	Swan Lake	Lake	United States of America	43.3552	-94.6829	81.9708	1.5	NA	NA	Anderson et al., 2020	Ray et al., in Review; Anderson et al., 2020; Amora Noguera 2022
592	Swan Lake 2	Lake	United States of America	42.9359	-93.7318	171.765	0.4	NA	NA	Anderson et al., 2020	Ray et al., in Review; Anderson et al., 2020; Amora Noguera 2022
593	Swasey	Lake	United States of America	40.667	-110.468	3.91	0.146	NA	9.5	Munroe and Bencher, 2019	Ray et al., in Review; Anderson et al., 2020; Amora Noguera 2022
594	TA1 (Jo·)	Lake	Brazil	-2.26755	-55.4056	97.3	NA	NA	NA	Amora-Nogueira et al., 2022	Ray et al., in Review; Anderson et al., 2020; Amora Noguera 2022
595	TA11b (Santa Ninha)	Lake	Brazil	-2.04282	-55.4757	40.4762	NA	NA	NA	Amora-Nogueira et al., 2022	Ray et al., in Review; Anderson et al., 2020; Amora Noguera 2022
596	TA4 (Santa Ninha)	Lake	Brazil	-2.16101	-55.8746	52.381	NA	NA	NA	Amora-Nogueira et al., 2022	Ray et al., in Review; Anderson et al., 2020; Amora Noguera 2022
597	Taibai	Lake	China	30.1239	115.192	9	26	NA	3	Wang et al., 2018	Ray et al., in Review; Anderson et al., 2020; Amora Noguera 2022
598	Taihu Lake	Lake	China	31.3015	120.148	32.9267	2337.5	3	2	Anderson et al., 2020	Ray et al., in Review; Anderson et al., 2020; Amora Noguera 2022
599	Takkilt Nuur	Lake	Mongolia	48.8065	96.8062	30.2337	482	NA	NA	Anderson et al., 2020	Ray et al., in Review; Anderson et al., 2020; Amora Noguera 2022
600	Talahong Lake	Lake	China	46.772	124.137	36.42	68.2	NA	3.2	Bao et al., 2021	Ray et al., in Review; Anderson et al., 2020; Amora Noguera 2022
601	Tang	Lake	Canada	54.3231	-122.785	15.4518	0.44	10.9	5.7	Anderson et al., 2020	Ray et al., in Review; Anderson et al., 2020; Amora Noguera 2022
602	Tanners Lake	Lake	United States of America	44.9514	-92.9826	78.9227	0.294	NA	NA	Anderson et al., 2020	Ray et al., in Review; Anderson et al., 2020; Amora Noguera 2022
603	Tarawera	Lake	New Zealand	-38.193	176.426	1.56143	41.7	87.5	50	Santoso et al., 2017	Ray et al., in Review; Anderson et al., 2020; Amora Noguera 2022
604	Tarocuo	Lake	China	31.1262	84.0981	12	487	132	NA	Wang et al., 2018	Ray et al., in Review; Anderson et al., 2020; Amora Noguera 2022
605	TDRD2.2-Tumbolovat	Lake	Russia	67.1167	59.5667	12.9219	1.56	NA	NA	Anderson et al., 2020	Ray et al., in Review; Anderson et al., 2020; Amora Noguera 2022
606	TDRV1.1-Podvaty	Lake	Russia	67.45	63.0833	18.5049	NA	NA	NA	Anderson et al., 2020	Ray et al., in Review; Anderson et al., 2020; Amora Noguera 2022
607	TDRV4.2	Lake	Russia	65.9667	57.2667	10.6369	NA	NA	NA	Anderson et al., 2020	Ray et al., in Review; Anderson et al., 2020; Amora Noguera 2022
608	Ten Mile Lake	Lake	United States of America	46.9642	-94.5768	76.7512	20.42	63	NA	Anderson et al., 2020	Ray et al., in Review; Anderson et al., 2020; Amora Noguera 2022
609	Tettegouche	Lake	United States of America	47.3456	-91.2685	42.1299	0.254	4.6	NA	Anderson et al., 2020	Ray et al., in Review; Anderson et al., 2020; Amora Noguera 2022
610	Tikitapu	Lake	New Zealand	-38.1955	176.332	0.60055	1.5	27.5	18	Santoso et al., 2017	Ray et al., in Review; Anderson et al., 2020; Amora Noguera 2022
611	Todd Lake	Lake	United States of America	44.0316	-121.687	24.3884	0.117721	NA	NA	Mendonca et al., 2017	Ray et al., in Review; Anderson et al., 2020; Amora Noguera 2022
612	Tongree	Lake	United Kingdom	54.14	-7.32	720.384	34.5	8	NA	Anderson et al., 2020	Ray et al., in Review; Anderson et al., 2020; Amora Noguera 2022
614	Tooth	Lake	United States of America	48.3983	-92.643	20.4403	0.241	13.1	NA	Anderson et al., 2020	Ray et al., in Review; Anderson et al., 2020; Amora Noguera 2022
615	Topsail	Lake	Canada	49.133	-56.013	16.8077	NA	NA	NA	Anderson et al., 2020	Ray et al., in Review; Anderson et al., 2020; Amora Noguera 2022
616	Toreadora	Lake	Ecuador	-2.78087	-79.2237	17.4771	0.186	31	NA	Anderson et al., 2020	Ray et al., in Review; Anderson et al., 2020; Amora Noguera 2022
617	Torup So	Lake	Denmark	56.0163	9.43143	66.1067	0.18	9.7	NA	Anderson et al., 2020	Ray et al., in Review; Anderson et al., 2020; Amora Noguera 2022
618	Tourangeau	Lake	Canada	47.9298	-71.2432	22.7948	0.993	NA	NA	Anderson et al., 2020	Ray et al., in Review; Anderson et al., 2020; Amora Noguera 2022
619	Trout Lake	Lake	United States of America	47.8708	-90.1694	14.5921	1.029	NA	NA	Anderson et al., 2020	Ray et al., in Review; Anderson et al., 2020; Amora Noguera 2022
620	Trumbull Lake	Lake	United States of America	43.1994	-94.951	39.6359	4.8	NA	NA	Anderson et al., 2020	Ray et al., in Review; Anderson et al., 2020; Amora Noguera 2022
621	Trumpeter_YS	Lake	United States of America	44.9157	-110.369	28.496	12.3	3	1.6	Anderson et al., 2020	Ray et al., in Review; Anderson et al., 2020; Amora Noguera 2022
622	Tsegen	Lake	Mongolia	48.9118	94.8671	53.4333	1242	NA	NA	Anderson et al., 2020	Ray et al., in Review; Anderson et al., 2020; Amora Noguera 2022
623	Tucunare	Lake	Brazil	-8.40132	-63.4018	452.022	0.11	NA	NA	Anderson et al., 2020	Ray et al., in Review; Anderson et al., 2020; Amora Noguera 2022
624	Tuosuhu	Lake	China	37.1361	96.927	1	166	24	NA	Wang et al., 2018	Ray et al., in Review; Anderson et al., 2020; Amora Noguera 2022
625	Turkana	Lake	Kenya	3	36.3483	162	8680	109	30.2	Mendonca et al., 2017	Ray et al., in Review; Anderson et al., 2020; Amora Noguera 2022
626	Turtle Lake Minnesota EL	Lake	United States of America	45.8853	-95.8356	145.851	0.276	8.5	NA	Anderson et al., 2020	Ray et al., in Review; Anderson et al., 2020; Amora Noguera 2022
627	Turtle Lake Minnesota S	Lake	United States of America	45.0991	-93.1392	111.862	1.781	NA	NA	Anderson et al., 2020	Ray et al., in Review; Anderson et al., 2020; Amora Noguera 2022
628	Tyson Lake	Lake	United States of America	44.6136	-95.5304	53.3272	0.582	NA	NA	Anderson et al., 2020	Ray et al., in Review; Anderson et al., 2020; Amora Noguera 2022
629	Uluabat	Lake	Turkey	40.2166	28.4855	49.3168	116.5	4.5	NA	Anderson et al., 2020	Ray et al., in Review; Anderson et al., 2020; Amora Noguera 2022
630	Unnamed	Lake	Canada	53.8473	-125.017	13.5267	0.79	19.5	6.9	Anderson et al., 2020	Ray et al., in Review; Anderson et al., 2020; Amora Noguera 2022
631	Upper Gar Lake	Lake	United States of America	43.3689	-95.1211	43.0946	0.1	1.5	NA	Anderson et al., 2020	Ray et al., in Review; Anderson et al., 2020; Amora Noguera 2022
632	Upper Lough Macnean	Lake	Ireland	54.3039	-7.94724	32.5	10.1	24	NA	Mendonca et al., 2017	Ray et al., in Review; Anderson et al., 2020; Amora Noguera 2022
633	Upper Prior Lake	Lake	United States of America	44.7125	-93.4428	539.179	1.685	NA	NA	Anderson et al., 2020	Ray et al., in Review; Anderson et al., 2020; Amora Noguera 2022
634	Upper Sand Creek Lake	Lake	United States of America	37.9397	-105.54	8.41451	0.102483	NA	NA	Mendonca et al., 2017	Ray et al., in Review; Anderson et al., 2020; Amora Noguera 2022
635	Upper Summit	Lake	Canada	54.2945	-122.717	20.7919	0.97	6.4	3.5	Anderson et al., 2020	Ray et al., in Review; Anderson et al., 2020; Amora Noguera 2022
638	Vadnais Lake	Lake	United States of America	45.0469	-93.0874	112.532	1.501	NA	NA	Anderson et al., 2020	Ray et al., in Review; Anderson et al., 2020; Amora Noguera 2022
636	Vänern	Lake	Sweden	58.9167	13.5	38.1	5650	106	27	Mendonca et al., 2017	Ray et al., in Review; Anderson et al., 2020; Amora Noguera 2022
639	Vankavad Lake	Lake	Russia	65.9856	59.4564	4.90199	0.36	6.6	NA	Anderson et al., 2020	Ray et al., in Review; Anderson et al., 2020; Amora Noguera 2022
640	Vansjø	Lake	Norway	59.4435	10.7546	90.9137	36.9	16	NA	Anderson et al., 2020	Ray et al., in Review; Anderson et al., 2020; Amora Noguera 2022
641	Vanuk-ty Lake	Lake	Russia	67.9779	61.571	33.7577	8.3	35	1.73	Anderson et al., 2020	Ray et al., in Review; Anderson et al., 2020; Amora Noguera 2022
637	Vättern	Lake	Sweden	58.4	14.6	13	1912	128	39.8	Mendonca et al., 2017	Ray et al., in Review; Anderson et al., 2020; Amora Noguera 2022
642	Vesterborg	Lake	Denmark	54.8662	11.2727	78.1166	0.21	2.8	NA	Anderson et al., 2020	Ray et al., in Review; Anderson et al., 2020; Amora Noguera 2022
643	Virgin Lake	Lake	United States of America	43.101	-94.8937	104.435	0.9	NA	NA	Anderson et al., 2020	Ray et al., in Review; Anderson et al., 2020; Amora Noguera 2022
644	Vitznau Basin	Lake	Switzerland	47.0166	8.433	119.9	24.95	151	NA	Mendonca et al., 2017	Ray et al., in Review; Anderson et al., 2020; Amora Noguera 2022
645	Vork5	Lake	Russia	67.857	59.0257	30.4604	0.31	NA	NA	Anderson et al., 2020	Ray et al., in Review; Anderson et al., 2020; Amora Noguera 2022
646	Wanghu	Lake	China	29.865	115.345	20	42	5	4	Wang et al., 2018	Ray et al., in Review; Anderson et al., 2020; Amora Noguera 2022
647	Waterloo	Lake	Canada	45.3346	-72.5205	110.967	1.385	NA	NA	Anderson et al., 2020	Ray et al., in Review; Anderson et al., 2020; Amora Noguera 2022
648	Weir	Lake	United States of America	29	-81.9	65	23	NA	5.1	Waters et al., 2019	Ray et al., in Review; Anderson et al., 2020; Amora Noguera 2022
649	West Okoboji Lake	Lake	United States of America	43.3745	-95.1522	85.945	15.6	41.5	NA	Anderson et al., 2020	Ray et al., in Review; Anderson et al., 2020; Amora Noguera 2022
650	West Twin Lake	Lake	United States of America	46.8002	-92.5915	33.93	0.48	NA	NA	Anderson et al., 2020	Ray et al., in Review; Anderson et al., 2020; Amora Noguera 2022
651	White Iron Lake	Lake	United States of America	47.8916	-91.7756	52.294	12.93	NA	NA	Anderson et al., 2020	Ray et al., in Review; Anderson et al., 2020; Amora Noguera 2022
652	Whittlesey	Lake	United States of America	48.0059	-88.7072	26	65	7.6	NA	Anderson et al., 2020	Ray et al., in Review; Anderson et al., 2020; Amora Noguera 2022
653	Wild Rice Lake	Lake	United States of America	46.6738	-92.6037	32.8467	0.212	NA	NA	Anderson et al., 2020	Ray et al., in Review; Anderson et al., 2020; Amora Noguera 2022
654	Willeys Lake	Lake	United States of America	47.5352	-93.4589	30.1795	0.203	NA	NA	Anderson et al., 2020	Ray et al., in Review; Anderson et al., 2020; Amora Noguera 2022
655	Williams Lake	Lake	United States of America	46.9544	-94.6693	35.9211	0.369	NA	NA	Anderson et al., 2020	Ray et al., in Review; Anderson et al., 2020; Amora Noguera 2022
656	Wilson Lake Minnesota 1	Lake	United States of America	47.675	-91.0836	34.4209	2.533	NA	NA	Anderson et al., 2020	Ray et al., in Review; Anderson et al., 2020; Amora Noguera 2022
657	Wilson Lake Minnesota E	Lake	United States of America	47.6697	-91.0775	36.6961	2.533	NA	NA	Anderson et al., 2020	Ray et al., in Review; Anderson et al., 2020; Amora Noguera 2022
658	Windy	Lake	United States of America	47.7289	-91.0766	28.8858	1.81	NA	NA	Anderson et al., 2020	Ray et al., in Review; Anderson et al., 2020; Amora Noguera 2022
659	Winona Lake Minnesota A	Lake	United States of America	45.8746	-95.4053	126.309	0.74	NA	NA	Anderson et al., 2020	Ray et al., in Review; Anderson et al., 2020; Amora Noguera 2022
661	Woldsfeld Lake	Lake	United States of America	45.0047	-93.571	386.669	0.152	NA	NA	Anderson et al., 2020	Ray et al., in Review; Anderson et al., 2020; Amora Noguera 2022
662	Wolf Lake Minnesota LT	Lake	United States of America	43.8584	-95.0903	179.475	0.412	0.7	NA	Anderson et al., 2020	Ray et al., in Review; Anderson et al., 2020; Amora Noguera 2022
663	Woodcock	Lake	Canada	53.5824	-123.596	12.6629	1.33	15	6.8	Anderson et al., 2020	Ray et al., in Review; Anderson et al., 2020; Amora Noguera 2022
664	Wroxham Broad	Lake	United Kingdom	52.699	1.418	196.011	0.34	2	NA	Anderson et al., 2020	Ray et al., in Review; Anderson et al., 2020; Amora Noguera 2022
665	Wudalianchi3	Lake	China	48.43	126.12	6	8	NA	9	Wang et al., 2018	Ray et al., in Review; Anderson et al., 2020; Amora Noguera 2022
666	Wudalianchi5	Lake	China	48.46	126.8	5	5	NA	NA	Wang et al., 2018	Ray et al., in Review; Anderson et al., 2020; Amora Noguera 2022
660	Wuliangsuhai	Lake	China	40.9315	108.865	1.87	334	NA	0.9	Mendonca et al., 2017	Ray et al., in Review; Anderson et al., 2020; Amora Noguera 2022
667	Wushan	Lake	China	29.906	115.59	10	16	5	3	Wang et al., 2018	Ray et al., in Review; Anderson et al., 2020; Amora Noguera 2022
668	Xialongwan	Lake	China	42.3694	126.433	13	0.1	16	NA	Wang et al., 2018	Ray et al., in Review; Anderson et al., 2020; Amora Noguera 2022
669	Xiaolonghupao Lake	Lake	China	46.7844	124.357	94.11	16.1	NA	3.8	Bao et al., 2021	Ray et al., in Review; Anderson et al., 2020; Amora Noguera 2022
670	Xidahaihu	Lake	China	46.0218	124.59	1	27	NA	4	Wang et al., 2018	Ray et al., in Review; Anderson et al., 2020; Amora Noguera 2022
671	Xihulu Lake	Lake	China	46.7079	124.148	27.07	58.2	NA	3.5	Bao et al., 2021	Ray et al., in Review; Anderson et al., 2020; Amora Noguera 2022
672	Xingkaihu	Lake	Russia	44.97	132.32	11	4380	10	5	Wang et al., 2018	Ray et al., in Review; Anderson et al., 2020; Amora Noguera 2022
673	Xingyun	Lake	China	24.3279	102.78	19	35	11	5	Wang et al., 2018	Ray et al., in Review; Anderson et al., 2020; Amora Noguera 2022
674	Xinluhai	Lake	China	31.8484	99.1135	15	3	65	31	Wang et al., 2018	Ray et al., in Review; Anderson et al., 2020; Amora Noguera 2022
675	Yale	Lake	United States of America	28.9	-81.8	109	16.4	NA	2.8	Waters et al., 2019	Ray et al., in Review; Anderson et al., 2020; Amora Noguera 2022
676	Yangcheng	Lake	China	31.4069	120.803	32	119	10	1	Wang et al., 2018	Ray et al., in Review; Anderson et al., 2020; Amora Noguera 2022
677	Yanghu	Lake	China	35.42	84.61	16	675	59	30	Wang et al., 2018	Ray et al., in Review; Anderson et al., 2020; Amora Noguera 2022
678	Yangzhonzhu	Lake	China	24.9053	103.003	40	31	NA	20	Wang et al., 2018	Ray et al., in Review; Anderson et al., 2020; Amora Noguera 2022
679	Yindeertu	Lake	China	39.51	102.27	2	2	8	NA	Wang et al., 2018	Ray et al., in Review; Anderson et al., 2020; Amora Noguera 2022
680	Zagas	Lake	Mongolia	48.5061	90.61	15.6611	64	NA	NA	Anderson et al., 2020	Ray et al., in Review; Anderson et al., 2020; Amora Noguera 2022
681	Zhangdu	Lake	China	30.6399	114.698	9	35	NA	1	Wang et al., 2018	Ray et al., in Review; Anderson et al., 2020; Amora Noguera 2022
682	Zigetang	Lake	China	32.0613	90.8655	2	190	39	NA	Wang et al., 2018	Ray et al., in Review; Anderson et al., 2020; Amora Noguera 2022
683	Zug	Lake	Switzerland	47.1453	8.4911	27	38.3	85	NA	Mendonca et al., 2017	Ray et al., in Review; Anderson et al., 2020; Amora Noguera 2022

## Sheet: reservoir
No	Name	Ecosystem_type	Country	Lat	Lon	Carbon_gCm2yr	Area_km2	Max_depth_m	Mean_depth_m	Reference	Source	Comments
1	Acton	Reservoir	United States of America	39.559	-84.7365	290.719	2.4	8	NA	Mendonca et al., 2017	Ray et al., in Review; Anderson et al., 2020; Amora Noguera 2022
2	Alta Floresta	Reservoir	Brazil	-9.96667	-55.8167	206.19	NA	NA	NA	Mendonca et al., 2017	Ray et al., in Review; Anderson et al., 2020; Amora Noguera 2023
3	Backbone Lake	Reservoir	United States of America	42.6015	-91.536	1089	0.506	NA	NA	Mendonca et al., 2017	Ray et al., in Review; Anderson et al., 2020; Amora Noguera 2024	Agriculturally eutrophic
4	Burr Oak	Reservoir	United States of America	39.5426	-82.0562	50.274	2.78	8.1	NA	Mendonca et al., 2017	Ray et al., in Review; Anderson et al., 2020; Amora Noguera 2025
5	Coralville Reservoir	Reservoir	United States of America	41.7284	-91.5298	148	19.83	NA	NA	Mendonca et al., 2017	Ray et al., in Review; Anderson et al., 2020; Amora Noguera 2026
6	Curua Una	Reservoir	Brazil	-2.896	-54.413	91	72	NA	6	Quadra et al., 2020	Ray et al., in Review; Anderson et al., 2020; Amora Noguera 2027
7	Don Williams Lake	Reservoir	United States of America	42.1126	-94.0191	755	0.615	NA	NA	Mendonca et al., 2017	Ray et al., in Review; Anderson et al., 2020; Amora Noguera 2028	Agriculturally eutrophic
8	Eastmain-1	Reservoir	Canada	52.1817	-75.8739	32.9	603	NA	11	Mendonca et al., 2017	Ray et al., in Review; Anderson et al., 2020; Amora Noguera 2029
9	Fairfield 3	Reservoir	United States of America	41.0333	-91.95	773	0.162	NA	NA	Mendonca et al., 2017	Ray et al., in Review; Anderson et al., 2020; Amora Noguera 2030	Agriculturally eutrophic
10	Farmer’s Ditch	Reservoir	United States of America	42.3833	-96.075	2227	3.885	NA	NA	Mendonca et al., 2017	Ray et al., in Review; Anderson et al., 2020; Amora Noguera 2031	Agriculturally eutrophic
11	Fayette	Reservoir	United States of America	39.1697	-92.7353	229	0.23	NA	NA	Mendonca et al., 2017	Ray et al., in Review; Anderson et al., 2020; Amora Noguera 2032
12	Heihai	Reservoir	China	25.21	100.2	8	0.18	42	22	Wang et al., 2018	Ray et al., in Review; Anderson et al., 2020; Amora Noguera 2033
13	Hongfeng Reservoir	Reservoir	China	26.477	106.411	117	57.33	45	10.5	Wang et al., 2019	Ray et al., in Review; Anderson et al., 2020; Amora Noguera 2034
14	Huairou Reservoir	Reservoir	China	40.3186	116.614	63.2	12	NA	NA	Mendonca et al., 2017	Ray et al., in Review; Anderson et al., 2020; Amora Noguera 2035
15	Jamesport	Reservoir	United States of America	39.9991	-93.8425	183	0.11	NA	NA	Mendonca et al., 2017	Ray et al., in Review; Anderson et al., 2020; Amora Noguera 2036
16	Lake ESEC	Reservoir	Brazil	-6.58028	-37.2556	160.6	0.2	NA	2	Mendonca et al., 2017	Ray et al., in Review; Anderson et al., 2020; Amora Noguera 2037
17	Lake Kariba	Reservoir	Zambia	-16.5223	28.7602	23	5400	97	NA	Mendonca et al., 2017	Ray et al., in Review; Anderson et al., 2020; Amora Noguera 2038
18	Lake Panorama	Reservoir	United States of America	41.7068	-94.3718	6987	5.666	NA	NA	Mendonca et al., 2017	Ray et al., in Review; Anderson et al., 2020; Amora Noguera 2039	Agriculturally eutrophic
19	Lake Wapello	Reservoir	United States of America	40.8198	-92.5747	508	1.153	10.3	NA	Mendonca et al., 2017	Ray et al., in Review; Anderson et al., 2020; Amora Noguera 2040	Agriculturally eutrophic
20	Lick Creek	Reservoir	United States of America	36.5625	-92.3197	256	NA	NA	NA	Mendonca et al., 2017	Ray et al., in Review; Anderson et al., 2020; Amora Noguera 2041
21	Lower Pine Lake	Reservoir	United States of America	42.3688	-93.0749	5771	0.263	NA	NA	Mendonca et al., 2017	Ray et al., in Review; Anderson et al., 2020; Amora Noguera 2042	Agriculturally eutrophic
22	Mascarenhas de Moraes	Reservoir	Brazil	-20.2867	-47.064	42.2	250	60	NA	Mendonca et al., 2017	Ray et al., in Review; Anderson et al., 2020; Amora Noguera 2043
23	Miami Whitewater	Reservoir	United States of America	39.2568	-84.7422	160.898	0.3	1	NA	Mendonca et al., 2017	Ray et al., in Review; Anderson et al., 2020; Amora Noguera 2044
24	Pleasant Hill	Reservoir	United States of America	40.6253	-82.3257	104.101	3.17	7.3	NA	Mendonca et al., 2017	Ray et al., in Review; Anderson et al., 2020; Amora Noguera 2045
25	Prairie Rose Lake	Reservoir	United States of America	41.6027	-95.2204	2862	0.882	NA	NA	Mendonca et al., 2017	Ray et al., in Review; Anderson et al., 2020; Amora Noguera 2046	Agriculturally eutrophic
26	Qingshui	Reservoir	China	25.44	100.12	5	7	15	NA	Wang et al., 2018	Ray et al., in Review; Anderson et al., 2020; Amora Noguera 2047
27	Rush Run	Reservoir	United States of America	39.5951	-84.6107	53.7108	0.21	8	NA	Mendonca et al., 2017	Ray et al., in Review; Anderson et al., 2020; Amora Noguera 2048
28	Sanjiaohai Lake	Reservoir	China	24.702	103.601	98.3	5.6	9.2	8	Han et al., 2022	Ray et al., in Review; Anderson et al., 2020; Amora Noguera 2049
29	Sauk North	Reservoir	United States of America	45.7939	-94.9356	42.3	8.59	NA	NA	Mendonca et al., 2017	Ray et al., in Review; Anderson et al., 2020; Amora Noguera 2050
30	Sharon Lake	Reservoir	United States of America	39.2843	-84.3891	562.962	0.14	4.5	NA	Mendonca et al., 2017	Ray et al., in Review; Anderson et al., 2020; Amora Noguera 2051
31	Shisanling Reservoir	Reservoir	China	40.2556	116.269	100.1	3.11	NA	NA	Mendonca et al., 2017	Ray et al., in Review; Anderson et al., 2020; Amora Noguera 2052
32	South Reservoir	Reservoir	United States of America	42.4442	-71.1164	19.7708	0.292679	NA	NA	Mendonca et al., 2017	Ray et al., in Review; Anderson et al., 2020; Amora Noguera 2053
33	Taiping Lake	Reservoir	China	24.433	103.531	25.4	7.7	18.3	15.9	Han et al., 2022	Ray et al., in Review; Anderson et al., 2020; Amora Noguera 2054
34	Theobold Main	Reservoir	United States of America	42.3833	-96.075	2519	0.106	NA	NA	Mendonca et al., 2017	Ray et al., in Review; Anderson et al., 2020; Amora Noguera 2055	Agriculturally eutrophic
35	Turkey Hill Reservoir	Reservoir	United States of America	41.4269	-72.5224	38.895	0.307481	NA	NA	Mendonca et al., 2017	Ray et al., in Review; Anderson et al., 2020; Amora Noguera 2056
36	Two Medicine Lake	Reservoir	United States of America	48.485	-113.375	14.3002	1.71683	NA	NA	Mendonca et al., 2017	Ray et al., in Review; Anderson et al., 2020; Amora Noguera 2057
37	Union Grove Lake	Reservoir	United States of America	42.1261	-92.7207	958	0.478	NA	NA	Mendonca et al., 2017	Ray et al., in Review; Anderson et al., 2020; Amora Noguera 2058	Agriculturally eutrophic
38	Winton Woods	Reservoir	United States of America	39.2598	-84.5138	344.835	0.71	3	NA	Mendonca et al., 2017	Ray et al., in Review; Anderson et al., 2020; Amora Noguera 2059
39	Wohlensee Area	Reservoir	Switzerland	46.9652	7.30207	965.308	2.5	11.4	9	Mendonca et al., 2017	Ray et al., in Review; Anderson et al., 2020; Amora Noguera 2060	Agriculturally eutrophic
40	Wujiangdu Reservoir	Reservoir	China	27.2823	106.619	579.2	24	95	NA	Qin et al., 2020	Ray et al., in Review; Anderson et al., 2020; Amora Noguera 2061
41	Xinanjiang Reservoir	Reservoir	China	29.5452	118.961	38.7	567	100	38.8	Wang et al., 2017	Ray et al., in Review; Anderson et al., 2020; Amora Noguera 2062
42	Yueliang	Reservoir	China	45.7209	123.93	119	206	4	2	Wang et al., 2018	Ray et al., in Review; Anderson et al., 2020; Amora Noguera 2063
43	Yunlongtianchi	Reservoir	China	25.8699	99.2793	2	2	17	9	Wang et al., 2018	Ray et al., in Review; Anderson et al., 2020; Amora Noguera 2064

## Sheet: inlandwetland
No	Name	Country	Ecosystem_type	Wetland_reported	Lat	Lon	Carbon_gCm2yr	Reference	Source
1	Westbroek	Netherlands	Inland wetland	Seasonal fresh marsh	52.1677	5.12486	258	Bakker et al., 1997	Wilkinson et al., 2018
2	St. Mark Swamp	United States of America	Inland wetland	swamp	30.1458	-84.1468	14.5	Happell et al., 1993	Wilkinson et al., 2018
3	Chichi	China	Inland wetland	Carex moss peatland	42.0547	128.058	269.7	Bao et al., 2010	Ray et al., in Review; Anderson et al., 2020; Amora Noguera 2022
4	Haerbaling	China	Inland wetland	Herbaceus peatland	43.2636	128.637	292.8	Bao et al., 2010	Ray et al., in Review; Anderson et al., 2020; Amora Noguera 2022
5	Jinbei	China	Inland wetland	Woody moss peatland	41.9786	127.621	233.5	Bao et al., 2010	Ray et al., in Review; Anderson et al., 2020; Amora Noguera 2022
6	Jinchuan	China	Inland wetland	Herbaceus peatland	42.3425	126.363	187.7	Bao et al., 2010	Ray et al., in Review; Anderson et al., 2020; Amora Noguera 2022
7	Yuanchi(1)	China	Inland wetland	Carex moss peatland	42.0317	128.434	134.1	Bao et al., 2010	Ray et al., in Review; Anderson et al., 2020; Amora Noguera 2022
8	Yuanchi(2)	China	Inland wetland	Carex moss peatland	42.0311	128.435	168.2	Bao et al., 2010	Ray et al., in Review; Anderson et al., 2020; Amora Noguera 2022
9	Yuanchi(3)	China	Inland wetland	Carex moss peatland	42.0328	128.436	186.3	Bao et al., 2010	Ray et al., in Review; Anderson et al., 2020; Amora Noguera 2022
10	Yuanchi(4)	China	Inland wetland	Woody moss peatland	42.035	128.434	124.2	Bao et al., 2010	Ray et al., in Review; Anderson et al., 2020; Amora Noguera 2022
11	Ancient Riverbed of Bielahong River - RERCA	China	Inland wetland	Humus marsh	47.9178	134.468	384	Bao et al., 2011	Ray et al., in Review; Anderson et al., 2020; Amora Noguera 2022
12	Honghe Nature Reserve - RERCA	China	Inland wetland	Herbaceous peatland	47.7894	133.629	361	Bao et al., 2011	Ray et al., in Review; Anderson et al., 2020; Amora Noguera 2022
13	Qianfeng Farmland - RERCA	China	Inland wetland	Marshy meadow	47.5947	133.784	170	Bao et al., 2011	Ray et al., in Review; Anderson et al., 2020; Amora Noguera 2022
14	Second Bridge of Naoli River - RERCA	China	Inland wetland	Humus marsh	47.2636	133.762	220	Bao et al., 2011	Ray et al., in Review; Anderson et al., 2020; Amora Noguera 2022
15	Third Experimental Area of Honghe Farmland - RERCA	China	Inland wetland	Marshy meadow	47.5911	133.647	188	Bao et al., 2011	Ray et al., in Review; Anderson et al., 2020; Amora Noguera 2022
16	FH - 1	China	Inland wetland	Fen bog	44.1	128.033	137.1	Bao et al., 2015	Ray et al., in Review; Anderson et al., 2020; Amora Noguera 2022
17	FH - 2	China	Inland wetland	Fen bog	44.1	128.033	143	Bao et al., 2015	Ray et al., in Review; Anderson et al., 2020; Amora Noguera 2022
18	MP - 1	China	Inland wetland	Fen bog	47.3667	120.65	185.2	Bao et al., 2015	Ray et al., in Review; Anderson et al., 2020; Amora Noguera 2022
19	MP - 2	China	Inland wetland	Fen bog	47.3667	120.65	259.3	Bao et al., 2015	Ray et al., in Review; Anderson et al., 2020; Amora Noguera 2022
20	MP - 3	China	Inland wetland	Fen bog	47.3667	120.65	166.7	Bao et al., 2015	Ray et al., in Review; Anderson et al., 2020; Amora Noguera 2022
21	YC - 1	China	Inland wetland	Fen bog	42.0333	128.433	111.9	Bao et al., 2015	Ray et al., in Review; Anderson et al., 2020; Amora Noguera 2022
22	YC - 2	China	Inland wetland	Fen bog	42.0333	128.433	141.8	Bao et al., 2015	Ray et al., in Review; Anderson et al., 2020; Amora Noguera 2022
23	YC - 3	China	Inland wetland	Fen bog	42.0333	128.433	156.9	Bao et al., 2015	Ray et al., in Review; Anderson et al., 2020; Amora Noguera 2022
24	YC - 4	China	Inland wetland	Fen bog	42.0333	128.433	104.8	Bao et al., 2015	Ray et al., in Review; Anderson et al., 2020; Amora Noguera 2022
25	CAS0	Canada	Inland wetland	Forested Peatland	49.5517	-78.9861	18	Beaulne et al., 2021	Ray et al., in Review; Anderson et al., 2020; Amora Noguera 2022
26	CAS100	Canada	Inland wetland	Forested Peatland	49.5517	-78.9861	8.8	Beaulne et al., 2021	Ray et al., in Review; Anderson et al., 2020; Amora Noguera 2022
27	CAS50	Canada	Inland wetland	Forested Peatland	49.5517	-78.9861	6	Beaulne et al., 2021	Ray et al., in Review; Anderson et al., 2020; Amora Noguera 2022
28	EARTH University	Costa Rica	Inland wetland	Slow flow rainforest swamp, deep peat	10.2054	-83.585	465	Bernal and Mitsch et al., 2013	Ray et al., in Review; Anderson et al., 2020; Amora Noguera 2022
29	EARTH University	Costa Rica	Inland wetland	Slow flow rainforest swamp, permanently flooded	10.2054	-83.585	222	Bernal and Mitsch et al., 2013	Ray et al., in Review; Anderson et al., 2020; Amora Noguera 2022
30	EARTH University	Costa Rica	Inland wetland	Slow flow rainforest swamp, vegetated edge	10.2054	-83.585	232	Bernal and Mitsch et al., 2013	Ray et al., in Review; Anderson et al., 2020; Amora Noguera 2022
31	La Selva	Costa Rica	Inland wetland	Depressional Isolated rainforest wetland, open mudflat	10.4228	-84.0224	61	Bernal and Mitsch et al., 2013	Ray et al., in Review; Anderson et al., 2020; Amora Noguera 2022
32	La Selva	Costa Rica	Inland wetland	Depressional Isolated rainforest wetland, shallow marsh	10.4228	-84.0224	131	Bernal and Mitsch et al., 2013	Ray et al., in Review; Anderson et al., 2020; Amora Noguera 2022
33	La Selva	Costa Rica	Inland wetland	Depressional Isolated rainforest wetland, vegetated edge	10.4228	-84.0224	61	Bernal and Mitsch et al., 2013	Ray et al., in Review; Anderson et al., 2020; Amora Noguera 2022
34	Okavango Delta	Botswana	Inland wetland	Floodplain, deep marsh	-19.5333	23.15	41	Bernal and Mitsch et al., 2013	Ray et al., in Review; Anderson et al., 2020; Amora Noguera 2022
35	Okavango Delta	Botswana	Inland wetland	Floodplain, riverine marsh	-19.5333	23.15	33	Bernal and Mitsch et al., 2013	Ray et al., in Review; Anderson et al., 2020; Amora Noguera 2022
36	Okavango Delta	Botswana	Inland wetland	Floodplain, shallow marsh	-19.5333	23.15	53	Bernal and Mitsch et al., 2013	Ray et al., in Review; Anderson et al., 2020; Amora Noguera 2022
37	Olentangy River Wetland Research Park - Naturally Colonized	United States of America	Inland wetland	Created riverine marsh	40.0202	-83.0186	267	Bernal and Mitsch et al., 2014	Ray et al., in Review; Anderson et al., 2020; Amora Noguera 2022
38	Olentangy River Wetland Research Park - Planted	United States of America	Inland wetland	Created riverine marsh	40.0202	-83.0186	219	Bernal and Mitsch et al., 2014	Ray et al., in Review; Anderson et al., 2020; Amora Noguera 2022
39	Palo Verde	Costa Rica	Inland wetland	Seasonal riverine wetland, mudflat	10.345	-85.3402	89	Bernal and Mitsch et al., 2013	Ray et al., in Review; Anderson et al., 2020; Amora Noguera 2022
40	Palo Verde	Costa Rica	Inland wetland	Seasonal riverine wetland, permanent pond	10.345	-85.3402	84	Bernal and Mitsch et al., 2013	Ray et al., in Review; Anderson et al., 2020; Amora Noguera 2022
41	Palo Verde	Costa Rica	Inland wetland	Seasonal riverine wetland, vegetated edge	10.345	-85.3402	80	Bernal and Mitsch et al., 2013	Ray et al., in Review; Anderson et al., 2020; Amora Noguera 2022
44	Blue Cypress	United States of America	Inland wetland	Marsh	27.696	-80.728	202	Brenner et al., 2001	Ray et al., in Review; Anderson et al., 2020; Amora Noguera 2022
45	BP	Argentina	Inland wetland	Peat bog	-52.057	-71.935	39.86	Bunsen and Loisel et al., 2020	Ray et al., in Review; Anderson et al., 2020; Amora Noguera 2022
46	MP	Argentina	Inland wetland	Peat bog	-51.752	-72.849	62.09	Bunsen and Loisel et al., 2020	Ray et al., in Review; Anderson et al., 2020; Amora Noguera 2022
47	Chaha'erqiao	China	Inland wetland	Bog	33.5369	102.864	15	Chen et al., 2014	Ray et al., in Review; Anderson et al., 2020; Amora Noguera 2022
48	Denahequ	China	Inland wetland	Bog	33.5336	102.807	23	Chen et al., 2014	Ray et al., in Review; Anderson et al., 2020; Amora Noguera 2022
49	Hongyuan	China	Inland wetland	Bog	32.7578	102.577	16	Chen et al., 2014	Ray et al., in Review; Anderson et al., 2020; Amora Noguera 2022
50	Huahu	China	Inland wetland	Bog	33.9189	102.869	19	Chen et al., 2014	Ray et al., in Review; Anderson et al., 2020; Amora Noguera 2022
51	Longriba	China	Inland wetland	Bog	32.4411	102.376	7	Chen et al., 2014	Ray et al., in Review; Anderson et al., 2020; Amora Noguera 2022
52	Naluoqiao	China	Inland wetland	Bog	33.4533	102.638	29.5	Chen et al., 2014	Ray et al., in Review; Anderson et al., 2020; Amora Noguera 2022
53	Riganqiao	China	Inland wetland	Bog	33.1042	102.652	23	Chen et al., 2014	Ray et al., in Review; Anderson et al., 2020; Amora Noguera 2022
54	Altamaha - Pb	United States of America	Inland wetland	Tidal freshwater forested wetland	31.6121	-81.8169	90	Craft et al., 2012	Ray et al., in Review; Anderson et al., 2020; Amora Noguera 2022
55	Ogeechee - Pb	United States of America	Inland wetland	Tidal freshwater forested wetland	31.9835	-81.3182	83	Craft et al., 2012	Ray et al., in Review; Anderson et al., 2020; Amora Noguera 2022
56	S. Newport - Pb	United States of America	Inland wetland	Tidal freshwater forested wetland	31.6706	-81.2749	88	Craft et al., 2012	Ray et al., in Review; Anderson et al., 2020; Amora Noguera 2022
57	Satilla - Pb	United States of America	Inland wetland	Tidal freshwater forested wetland	30.9847	-81.9133	57	Craft et al., 2012	Ray et al., in Review; Anderson et al., 2020; Amora Noguera 2022
58	Willow Slough Wildlife Mnagement area	United States of America	Inland wetland	Depression wetland	41.22	-87.28	39	Craft et al., 2018	Henry et al., 2024
59	UNESCO MAB Třeboň Biosphere Reserve	Czech Republic	Inland wetland	Depression wetland	49.08	14.82	110	Craft et al., 2018	Henry et al., 2024
60	Everglades NP - Pb	United States of America	Inland wetland	Everglades	25.5713	-80.6852	124	Craft et al., 1998	Ray et al., in Review; Anderson et al., 2020; Amora Noguera 2022
61	Loxahatchee NWR - Pb	United States of America	Inland wetland	Everglades	26.5236	-80.3262	36	Craft et al., 1998	Ray et al., in Review; Anderson et al., 2020; Amora Noguera 2022
62	WCA 2A (enriched #1 > 1962) - Pb	United States of America	Inland wetland	Everglades	26.2991	-80.3661	213	Craft et al., 1998	Ray et al., in Review; Anderson et al., 2020; Amora Noguera 2022
63	WCA 2A (enriched #2 > 1963) - Pb	United States of America	Inland wetland	Everglades	26.3461	-80.3481	156	Craft et al., 1998	Ray et al., in Review; Anderson et al., 2020; Amora Noguera 2022
64	WCA 2A (unenriched) - Pb	United States of America	Inland wetland	Everglades	26.1824	-80.4333	118	Craft et al., 1998	Ray et al., in Review; Anderson et al., 2020; Amora Noguera 2022
65	WCA 3A - Pb	United States of America	Inland wetland	Everglades	25.8985	-80.6441	81	Craft et al., 1998	Ray et al., in Review; Anderson et al., 2020; Amora Noguera 2022
66	Hudson Bay Lowlands - VM375 Core	Canada	Inland wetland	peatland	52.6923	-83.9442	19	Da Silva et al., 2022	Ray et al., in Review; Anderson et al., 2020; Amora Noguera 2022
67	Winyah Bay Drainage Basin	United States of America	Inland wetland	Tidal fresh	33.5191	-79.1491	219	Drexler et al., 2013	Wilkinson et al., 2018
68	Winyah Bay Drainage Basin	United States of America	Inland wetland	Seasonal fresh	33.5316	-79.1569	91	Drexler et al., 2013	Wilkinson et al., 2018
69	Laolike peatland	China	Inland wetland	peatland	42.4797	128.666	42	Dong et al., 2021	Ray et al., in Review; Anderson et al., 2020; Amora Noguera 2022
70	Hank's Marsh	United States of America	Inland wetland	Marsh	42.3103	-121.83	101	Graham et al., 2005	Ray et al., in Review; Anderson et al., 2020; Amora Noguera 2022
71	Squaw Point	United States of America	Inland wetland	Marsh	42.3469	-121.934	209	Graham et al., 2005	Ray et al., in Review; Anderson et al., 2020; Amora Noguera 2022
72	Upper Klamath NWR (1972- Present)	United States of America	Inland wetland	Marsh	42.4898	-122.058	115	Graham et al., 2005	Ray et al., in Review; Anderson et al., 2020; Amora Noguera 2022
73	Manasaya	Chile	Inland wetland	Peatland	-18.0689	-69.0333	47	Hribljan et al., 2015	Ray et al., in Review; Anderson et al., 2020; Amora Noguera 2022
74	Tuni	Bolivia	Inland wetland	Peatland	-16.2183	-68.2225	37	Hribljan et al., 2015	Ray et al., in Review; Anderson et al., 2020; Amora Noguera 2022
75	A1	Ecuador	Inland wetland	Peatland	-0.480641	-78.1572	224	Hribljan et al., 2016	Ray et al., in Review; Anderson et al., 2020; Amora Noguera 2022
76	A2	Ecuador	Inland wetland	Peatland	-0.5055	-78.2441	25	Hribljan et al., 2016	Ray et al., in Review; Anderson et al., 2020; Amora Noguera 2022
77	A3	Ecuador	Inland wetland	Peatland	-0.493453	-78.2811	20	Hribljan et al., 2016	Ray et al., in Review; Anderson et al., 2020; Amora Noguera 2022
78	C1	Ecuador	Inland wetland	Peatland	-0.31041	-78.1924	43	Hribljan et al., 2016	Ray et al., in Review; Anderson et al., 2020; Amora Noguera 2022
79	C2	Ecuador	Inland wetland	Peatland	-0.31916	-78.2	12	Hribljan et al., 2016	Ray et al., in Review; Anderson et al., 2020; Amora Noguera 2022
80	C3	Ecuador	Inland wetland	Peatland	-0.31209	-78.1923	50	Hribljan et al., 2016	Ray et al., in Review; Anderson et al., 2020; Amora Noguera 2022
81	C4	Ecuador	Inland wetland	Peatland	-0.32143	-78.1993	38	Hribljan et al., 2016	Ray et al., in Review; Anderson et al., 2020; Amora Noguera 2022
82	C5	Ecuador	Inland wetland	Peatland	-0.327	-78.2021	23	Hribljan et al., 2016	Ray et al., in Review; Anderson et al., 2020; Amora Noguera 2022
83	C6	Ecuador	Inland wetland	Peatland	-0.328749	-78.2152	15	Hribljan et al., 2016	Ray et al., in Review; Anderson et al., 2020; Amora Noguera 2022
84	BS	Belize	Inland wetland	Sand based marsh	17.9985	-88.4579	39.8	Kim et al., 2002	Ray et al., in Review; Anderson et al., 2020; Amora Noguera 2022
85	BV	Belize	Inland wetland	Marl based marsh	18.3099	-88.4889	32.4	Kim et al., 2002	Ray et al., in Review; Anderson et al., 2020; Amora Noguera 2022
86	CC	Belize	Inland wetland	Marl based marsh	18.4418	-88.4711	48.6	Kim et al., 2002	Ray et al., in Review; Anderson et al., 2020; Amora Noguera 2022
87	DBL	Belize	Inland wetland	Marl based marsh	18.0829	-88.4447	28.9	Kim et al., 2002	Ray et al., in Review; Anderson et al., 2020; Amora Noguera 2022
88	ONH	Belize	Inland wetland	Sand based marsh	17.9797	-88.3914	55.9	Kim et al., 2002	Ray et al., in Review; Anderson et al., 2020; Amora Noguera 2022
89	ONH11	Belize	Inland wetland	Sand based marsh	18.0045	-88.5246	30.3	Kim et al., 2002	Ray et al., in Review; Anderson et al., 2020; Amora Noguera 2022
90	Store Mosse	Sweden	Inland wetland	Bog	57.2269	13.9214	22.9	Kylander et al., 2018	Ray et al., in Review; Anderson et al., 2020; Amora Noguera 2022
91	Quistococha	Peru	Inland wetland	Tropical lowland peatland	-3.84	-73.3194	74	Lähteenoja et al., 2009	Ray et al., in Review; Anderson et al., 2020; Amora Noguera 2022
92	Rinon	Peru	Inland wetland	Tropical lowland peatland	-4.9	-74.0015	39	Lähteenoja et al., 2009	Ray et al., in Review; Anderson et al., 2020; Amora Noguera 2022
93	San Jorge	Peru	Inland wetland	Tropical lowland peatland	-4.06247	-73.1925	85	Lähteenoja et al., 2009	Ray et al., in Review; Anderson et al., 2020; Amora Noguera 2022
94	Aucayacu	Peru	Inland wetland	Tropical lowland peatland	-3.93683	-74.3849	39	Lähteenoja et al., 2009	Ray et al., in Review; Anderson et al., 2020; Amora Noguera 2022
95	Maquia	Peru	Inland wetland	Tropical lowland peatland	-6.32725	-74.8137	39	Lähteenoja et al., 2009	Ray et al., in Review; Anderson et al., 2020; Amora Noguera 2022
96	Roca Fuerte	Peru	Inland wetland	Tropical lowland peatland	-4.43731	-74.8278	36	Lähteenoja et al., 2009	Ray et al., in Review; Anderson et al., 2020; Amora Noguera 2022
97	CA	Chile	Inland wetland	Peatland	-42.5	-74	45.55	Leon et al., 2014	Ray et al., in Review; Anderson et al., 2020; Amora Noguera 2022
98	CH	Chile	Inland wetland	Peatland	-42.5	-74	49.43	Leon et al., 2014	Ray et al., in Review; Anderson et al., 2020; Amora Noguera 2022
99	PL	Chile	Inland wetland	Peatland	-42.5	-74	59.86	Leon et al., 2014	Ray et al., in Review; Anderson et al., 2020; Amora Noguera 2022
100	SD	Chile	Inland wetland	Peatland	-42.5	-74	50.8	Leon et al., 2014	Ray et al., in Review; Anderson et al., 2020; Amora Noguera 2022
101	TG	Chile	Inland wetland	Peatland	-42.5	-74	59.86	Leon et al., 2014	Ray et al., in Review; Anderson et al., 2020; Amora Noguera 2022
102	Lili	Canada	Inland wetland	Forested peatland	49.1719	-70.3689	11.3	Magnan et al., 2020	Ray et al., in Review; Anderson et al., 2020; Amora Noguera 2022
103	Villebois	Canada	Inland wetland	Forested peatland	49.4211	-79.0031	20.4	Magnan et al., 2020	Ray et al., in Review; Anderson et al., 2020; Amora Noguera 2022
104	Estero Dulce	Mexico	Inland wetland	Marsh	20.298	-96.872	310	Marín-Muñiz et al., 2020	Ray et al., in Review; Anderson et al., 2020; Amora Noguera 2022
105	Estero Dulce	Mexico	Inland wetland	Swamp	20.298	-96.872	920	Marín-Muñiz et al., 2020	Ray et al., in Review; Anderson et al., 2020; Amora Noguera 2022
106	San Joaquin River Constructed Wetland	United States of America	Inland wetland	Constructed wetland	37.6238	-121.193	210	Maynard et al., 2011	Ray et al., in Review; Anderson et al., 2020; Amora Noguera 2022
107	S1 Bog	United States of America	Inland wetland	ombrotrophic peatland	47.5132	93.4545	22.2	McFarlane et al., 2018	Ray et al., in Review; Anderson et al., 2020; Amora Noguera 2022
108	Rzecin peatland	Poland	Inland wetland	Peatland	52.75	16.3	181	Milecka et al., 2017	Ray et al., in Review; Anderson et al., 2020; Amora Noguera 2022
109	Imnavait Creek Peatland	United States of America	Inland wetland	peatland	68.6081	-149.314	22	Nichols et al., 2017	Ray et al., in Review; Anderson et al., 2020; Amora Noguera 2022
110	10	United States of America	Inland wetland	Storm Treatment Wetland	26.3461	-80.3481	387	Reddy et al., 1993	Ray et al., in Review; Anderson et al., 2020; Amora Noguera 2022
111	11A	United States of America	Inland wetland	Storm Treatment Wetland	26.3461	-80.3481	242	Reddy et al., 1993	Ray et al., in Review; Anderson et al., 2020; Amora Noguera 2022
112	11B	United States of America	Inland wetland	Storm Treatment Wetland	26.3461	-80.3481	163	Reddy et al., 1993	Ray et al., in Review; Anderson et al., 2020; Amora Noguera 2022
113	12	United States of America	Inland wetland	Storm Treatment Wetland	26.3461	-80.3481	208	Reddy et al., 1993	Ray et al., in Review; Anderson et al., 2020; Amora Noguera 2022
114	13	United States of America	Inland wetland	Storm Treatment Wetland	26.3461	-80.3481	140	Reddy et al., 1993	Ray et al., in Review; Anderson et al., 2020; Amora Noguera 2022
115	14	United States of America	Inland wetland	Storm Treatment Wetland	26.3461	-80.3481	153	Reddy et al., 1993	Ray et al., in Review; Anderson et al., 2020; Amora Noguera 2022
116	15	United States of America	Inland wetland	Storm Treatment Wetland	26.3461	-80.3481	86	Reddy et al., 1993	Ray et al., in Review; Anderson et al., 2020; Amora Noguera 2022
117	16	United States of America	Inland wetland	Storm Treatment Wetland	26.3461	-80.3481	127	Reddy et al., 1993	Ray et al., in Review; Anderson et al., 2020; Amora Noguera 2022
118	17	United States of America	Inland wetland	Storm Treatment Wetland	26.3461	-80.3481	158	Reddy et al., 1993	Ray et al., in Review; Anderson et al., 2020; Amora Noguera 2022
119	Danube River Banks	Austria	Inland wetland	Floodplain forests	48.135	16.602	280	Rieger et al., 2014	Ray et al., in Review; Anderson et al., 2020; Amora Noguera 2022
120	Mer Bleue	Canada	Inland wetland	Bog	45.6833	-75.8	17.95	Roulet et al., 2007	Ray et al., in Review; Anderson et al., 2020; Amora Noguera 2022
121	Twitchell Island	United States of America	Inland wetland	Constructed wetland	38.1083	-121.651	280	Stumpner et al., 2018	Ray et al., in Review; Anderson et al., 2020; Amora Noguera 2022
122	Four Level	United States of America	Inland wetland	Bog	36.86	-83.38	23	Thompson et al., 2007	Ray et al., in Review; Anderson et al., 2020; Amora Noguera 2022
123	Kentenia	United States of America	Inland wetland	Bog	36.9183	-83.38	18	Thompson et al., 2007	Ray et al., in Review; Anderson et al., 2020; Amora Noguera 2022
124	Martins Fork	United States of America	Inland wetland	Bog	36.68	-83.46	31	Thompson et al., 2007	Ray et al., in Review; Anderson et al., 2020; Amora Noguera 2022
125	Ahvensalo - LORCA	Finland	Inland wetland	Fen	62.8458	30.8914	14.7	Tolonen and Turunen et al., 1996	Ray et al., in Review; Anderson et al., 2020; Amora Noguera 2022
126	Big Heath - LORCA	Finland	Inland wetland	Bog	44.2375	-68.3214	20.5	Tolonen and Turunen et al., 1996	Ray et al., in Review; Anderson et al., 2020; Amora Noguera 2022
127	Kaurastensuo - LORCA	Finland	Inland wetland	Bog	61.0322	24.9842	18.3	Tolonen and Turunen et al., 1996	Ray et al., in Review; Anderson et al., 2020; Amora Noguera 2022
128	Korkianeva - LORCA	Finland	Inland wetland	Bog	62.7178	21.9333	20.2	Tolonen and Turunen et al., 1996	Ray et al., in Review; Anderson et al., 2020; Amora Noguera 2022
129	Korvinsuo 1 - LORCA	Finland	Inland wetland	Bog	62.7583	30.9344	13.7	Tolonen and Turunen et al., 1996	Ray et al., in Review; Anderson et al., 2020; Amora Noguera 2022
130	Korvinsuo 5 - LORCA	Finland	Inland wetland	Bog	62.7583	30.9222	16.5	Tolonen and Turunen et al., 1996	Ray et al., in Review; Anderson et al., 2020; Amora Noguera 2022
131	Kunoniemensuo - LORCA	Finland	Inland wetland	Bog	62.0808	30.1706	18.1	Tolonen and Turunen et al., 1996	Ray et al., in Review; Anderson et al., 2020; Amora Noguera 2022
132	Laaviosuo - LORCA	Finland	Inland wetland	Bog	61.0331	25	20.8	Tolonen and Turunen et al., 1996	Ray et al., in Review; Anderson et al., 2020; Amora Noguera 2022
133	Lakkasuo 4L27 - LORCA	Finland	Inland wetland	Bog	61.7947	24.3083	24.7	Tolonen and Turunen et al., 1996	Ray et al., in Review; Anderson et al., 2020; Amora Noguera 2022
134	Munasuo - LORCA	Finland	Inland wetland	Bog	60.5567	26.6486	35.2	Tolonen and Turunen et al., 1996	Ray et al., in Review; Anderson et al., 2020; Amora Noguera 2022
135	Nigula Raba - LORCA	Finland	Inland wetland	Bog	58.0139	24.6944	29.5	Tolonen and Turunen et al., 1996	Ray et al., in Review; Anderson et al., 2020; Amora Noguera 2022
136	Sarkansuo - LORCA	Finland	Inland wetland	Bog	62.8111	30.95	18.6	Tolonen and Turunen et al., 1996	Ray et al., in Review; Anderson et al., 2020; Amora Noguera 2022
137	Siikaneva - LORCA	Finland	Inland wetland	Fen	61.8258	24.1872	19.2	Tolonen and Turunen et al., 1996	Ray et al., in Review; Anderson et al., 2020; Amora Noguera 2022
138	Silmasvuoma - LORCA	Finland	Inland wetland	Fen	67.5528	25.6333	9.6	Tolonen and Turunen et al., 1996	Ray et al., in Review; Anderson et al., 2020; Amora Noguera 2022
139	Suurisuo - LORCA	Finland	Inland wetland	Fen	60.9881	24.8072	249	Tolonen and Turunen et al., 1996	Ray et al., in Review; Anderson et al., 2020; Amora Noguera 2022
140	Varrassuo - LORCA	Finland	Inland wetland	Bog	60.9925	25.4842	17.2	Tolonen and Turunen et al., 1996	Ray et al., in Review; Anderson et al., 2020; Amora Noguera 2022
141	Old Black Spruce Site	Canada	Inland wetland	Poorly drained soils. Sphagnum in to of clay and sparce black spurs	55.8801	-98.4814	11.7143	Trumbore and Harden et al., 1997	Ray et al., in Review; Anderson et al., 2020; Amora Noguera 2022
142	Old Black Spruce Site	Canada	Inland wetland	Wetlands including fens and bogs	55.8801	-98.4814	63.05	Trumbore and Harden et al., 1997	Ray et al., in Review; Anderson et al., 2020; Amora Noguera 2022
143	site1	Finland	Inland wetland	Mire	60.1666	72.79	12.1	Turunen et al., 2001	Ray et al., in Review; Anderson et al., 2020; Amora Noguera 2022
144	site10	Finland	Inland wetland	Mire	60.182	72.785	16.1	Turunen et al., 2001	Ray et al., in Review; Anderson et al., 2020; Amora Noguera 2022
145	site11	Finland	Inland wetland	Mire	60.1841	72.805	17.9	Turunen et al., 2001	Ray et al., in Review; Anderson et al., 2020; Amora Noguera 2022
146	site2	Finland	Inland wetland	Mire	60.1693	72.8021	13.4	Turunen et al., 2001	Ray et al., in Review; Anderson et al., 2020; Amora Noguera 2022
147	site3	Finland	Inland wetland	Mire	60.1715	72.8155	22.4	Turunen et al., 2001	Ray et al., in Review; Anderson et al., 2020; Amora Noguera 2022
148	site4	Finland	Inland wetland	Mire	60.173	72.8333	23.7	Turunen et al., 2001	Ray et al., in Review; Anderson et al., 2020; Amora Noguera 2022
149	site5	Finland	Inland wetland	Mire	60.1773	72.814	16.9	Turunen et al., 2001	Ray et al., in Review; Anderson et al., 2020; Amora Noguera 2022
150	site6	Finland	Inland wetland	Mire	60.1784	72.8137	15.3	Turunen et al., 2001	Ray et al., in Review; Anderson et al., 2020; Amora Noguera 2022
151	site7	Finland	Inland wetland	Mire	60.1857	72.8023	18.1	Turunen et al., 2001	Ray et al., in Review; Anderson et al., 2020; Amora Noguera 2022
152	site8	Finland	Inland wetland	Mire	60.1828	72.7754	17	Turunen et al., 2001	Ray et al., in Review; Anderson et al., 2020; Amora Noguera 2022
153	site9	Finland	Inland wetland	Mire	60.18	72.785	16.2	Turunen et al., 2001	Ray et al., in Review; Anderson et al., 2020; Amora Noguera 2022
154	Karukinka_A_B	Chile	Inland wetland	Peat bog	-53.86	-69.5764	32.91	Van et al., 2016	Ray et al., in Review; Anderson et al., 2020; Amora Noguera 2022
155	Pulpito	Chile	Inland wetland	Peat bog	-42.7583	-73.7814	34.22	Van et al., 2016	Ray et al., in Review; Anderson et al., 2020; Amora Noguera 2022
156	Tierra_Australis	Argentina	Inland wetland	Peat bog	-54.6162	-67.7707	35.12	Van et al., 2016	Ray et al., in Review; Anderson et al., 2020; Amora Noguera 2022
157	ANZ	Canada	Inland wetland	Peatland	56.472	-111.043	65	van Bellen et al., 2020	Ray et al., in Review; Anderson et al., 2020; Amora Noguera 2022
158	JPH4	Canada	Inland wetland	Peatland	57.112	-111.423	38	van Bellen et al., 2020	Ray et al., in Review; Anderson et al., 2020; Amora Noguera 2022
159	MIL	Canada	Inland wetland	Peatland	56.931	-111.475	75.5	van Bellen et al., 2020	Ray et al., in Review; Anderson et al., 2020; Amora Noguera 2022
160	McK	Canada	Inland wetland	Peatland	57.228	-111.7	81	van Bellen et al., 2020	Ray et al., in Review; Anderson et al., 2020; Amora Noguera 2022
161	McM	Canada	Inland wetland	Peatland	56.628	-111.194	60.7	van Bellen et al., 2020	Ray et al., in Review; Anderson et al., 2020; Amora Noguera 2022
162	SEB	Canada	Inland wetland	Peatland	53.476	-114.879	47.2	van Bellen et al., 2020	Ray et al., in Review; Anderson et al., 2020; Amora Noguera 2022
163	UTK	Canada	Inland wetland	Peatland	56.076	-115.475	58.9	van Bellen et al., 2020	Ray et al., in Review; Anderson et al., 2020; Amora Noguera 2022
164	BB1	Canada	Inland wetland	permafrost peatland	64.702	-105.57	14.3	Vardy et al., 2000	Ray et al., in Review; Anderson et al., 2020; Amora Noguera 2022
165	CC-P	Canada	Inland wetland	permafrost peatland	68.283	-133.25	13.4	Vardy et al., 2000	Ray et al., in Review; Anderson et al., 2020; Amora Noguera 2022
166	KJ-B	Canada	Inland wetland	permafrost peatland	69.485	-132.667	12.5	Vardy et al., 2000	Ray et al., in Review; Anderson et al., 2020; Amora Noguera 2022
167	TK1P2	Canada	Inland wetland	permafrost peatland	66.45	-104.83	16.5	Vardy et al., 2000	Ray et al., in Review; Anderson et al., 2020; Amora Noguera 2022
168	Bald Cypress	United States of America	Inland wetland	Forested wetland	26.4	-81.6	98	Villa and Mitsch et al., 2014	Ray et al., in Review; Anderson et al., 2020; Amora Noguera 2022
169	Deep Slough	United States of America	Inland wetland	Forested wetland	26.4	-81.6	98	Villa and Mitsch et al., 2014	Ray et al., in Review; Anderson et al., 2020; Amora Noguera 2022
170	Pine Flatwood	United States of America	Inland wetland	Forested wetland	26.4	-81.6	22	Villa and Mitsch et al., 2014	Ray et al., in Review; Anderson et al., 2020; Amora Noguera 2022
171	Pond Cypress	United States of America	Inland wetland	Forested wetland	26.4	-81.6	64	Villa and Mitsch et al., 2014	Ray et al., in Review; Anderson et al., 2020; Amora Noguera 2022
172	Wet Prairie	United States of America	Inland wetland	Wet Prairie	26.4	-81.6	39	Villa and Mitsch et al., 2014	Ray et al., in Review; Anderson et al., 2020; Amora Noguera 2022
173	El Morro	Colombia	Inland wetland	Tropical alpine peatland	6.68167	-75.6771	40.4	Villa et al., 2019	Ray et al., in Review; Anderson et al., 2020; Amora Noguera 2022
174	E-0	China	Inland wetland	Freshwater marsh	44.9328	122.176	150.35	Wang et al., 2008	Ray et al., in Review; Anderson et al., 2020; Amora Noguera 2022
175	F-0	China	Inland wetland	Freshwater marsh	45.01	122.293	86.64	Wang et al., 2008	Ray et al., in Review; Anderson et al., 2020; Amora Noguera 2022
176	Hani mire	China	Inland wetland	peatland	42.1833	126.517	88.1	Yang et al., 2017	Ray et al., in Review; Anderson et al., 2020; Amora Noguera 2022
177	Posta Fibreno	Italy	Inland wetland	Free-floating peatland	41.6949	13.6918	180	Zaccone et al., 2017	Ray et al., in Review; Anderson et al., 2020; Amora Noguera 2022
178	Southern Ontario, Canada	Canada	Inland wetland	Intact inland marsh	43.28	-80.29	51	Creed et al., 2022	Ma et al., 2024
179	Southern Ontario, Canada	Canada	Inland wetland	Intact inland marsh	43.28	-80.29	79	Creed et al., 2022	Ma et al., 2024
180	Southern Ontario, Canada	Canada	Inland wetland	Intact inland marsh	43.28	-80.29	62	Creed et al., 2022	Ma et al., 2024
181	Southern Ontario, Canada	Canada	Inland wetland	Intact inland marsh	43.28	-80.29	60	Creed et al., 2022	Ma et al., 2024
182	Ohio, USA	United States of America	Inland wetland	Intact inland marsh	40	-82.83	210	Bernal & Mitsch (2012)	Ma et al., 2024
183	Georgia, USA	United States of America	Inland wetland	Intact inland marsh	31.22	-84.48	56	Craft & Casey (2000)	Ma et al., 2024
184	Montana, North and South Dakota, Minnesota and Iowa, USA	United States of America	Inland wetland	Intact inland marsh	45.6	-96.6	83	Euliss et al., 2006	Ma et al., 2024
185	Lake Erie, Ohio, USA	United States of America	Inland wetland	Intact inland marsh	41.46	-83	96.9	Chu et al., 2015	Ma et al., 2024
186	Louisiana, USA	United States of America	Inland wetland	Intact inland marsh	29.8	-90.55	198	Delaune et al., 1986	Ma et al., 2024
188	California, USA	United States of America	Inland wetland	Intact inland marsh	38.92	-122.62	138	Kim (2003)	Ma et al., 2024
189	Indiana, USA	United States of America	Inland wetland	Intact inland marsh	41.5	-86.24	62	Craft et al., 2008	Ma et al., 2024
190	Georgia, USA	United States of America	Inland wetland	Intact inland marsh	30.8	-82.33	24	Craft et al., 2008	Ma et al., 2024
191	Ohio, USA	United States of America	Inland wetland	Intact inland marsh	41.37	-82.52	105	Bernal & Mitsch (2012)	Ma et al., 2024
192	Southern Ontario, Canada	Canada	Inland wetland	Intact inland marsh	43.276	-80.2951	94	Creed et al., 2022	Ma et al., 2024
193	Southern Ontario, Canada	Canada	Inland wetland	Intact inland marsh	43.276	-80.2951	96	Creed et al., 2022	Ma et al., 2024
194	Frank's Tract	United States of America	Inland wetland	Floodplain	38.0436	-121.604	1500	Canuelet al., 2009	Wilkinson et al., 2018
195	Sacramento River	United States of America	Inland wetland	Floodplain	38.0793	-121.759	1000	Canuelet al., 2009	Wilkinson et al., 2018
196	San Joaquin River	United States of America	Inland wetland	Floodplain	38.0191	-121.463	1600	Canuelet al., 2009	Wilkinson et al., 2018
197	Danube floodplain	Austria	Inland wetland	Floodplain	48.12	16.69	180	Craft et al. 2018	Henry et al., 2024
198	Georgia	United States of America	Inland wetland	Floodplain	31.22	-84.48	63	Craft et al. 2018	Henry et al., 2024
199	Maryland	United States of America	Inland wetland	Floodplain	38	-76	60	Craft et al. 2018	Henry et al., 2024
200	Mid-Atlantic coastal plain	United States of America	Inland wetland	Floodplain	39.03	-77.61	143	Craft et al. 2018	Henry et al., 2024
201	Mid-Atlantic coastal plain (mean above)	United States of America	Inland wetland	Floodplain	38.25	-76.5	93	Craft et al. 2018	Henry et al., 2024
202	Virginia	United States of America	Inland wetland	Floodplain	38.97	-77.23	175	Craft et al. 2018	Henry et al., 2024
203	Virginia	United States of America	Inland wetland	Floodplain	38.97	-77.23	11	Craft et al. 2018	Henry et al., 2024
204	Rhine	Germany	Inland wetland	Floodplain	49.23	8.39	0.61	Hoffman et al. 2013	Henry et al., 2024
205	Aylett (AYL)	United States of America	Inland wetland	Floodplain	37.75	-77.15	244	Noe & Hupp 2009	Henry et al., 2024
206	Blades (BLD)	United States of America	Inland wetland	Floodplain	38.17	-75.42	133	Noe & Hupp 2009	Henry et al., 2024
207	Bottoms Bridge (BBR)	United States of America	Inland wetland	Floodplain	37.5	-77.25	121	Noe & Hupp 2009	Henry et al., 2024
208	Brock Bridge (BRB)	United States of America	Inland wetland	Floodplain	39	-76.67	73	Noe & Hupp 2009	Henry et al., 2024
209	Burkes Bridge (BRK)	United States of America	Inland wetland	Floodplain	37.9	-77.3	59	Noe & Hupp 2009	Henry et al., 2024
210	Cypress Swamp (CYP)	United States of America	Inland wetland	Floodplain	38.5	-75.25	127	Noe & Hupp 2009	Henry et al., 2024
211	Delaware Crossing (DEL)	United States of America	Inland wetland	Floodplain	38.5	-75.25	58	Noe & Hupp 2009	Henry et al., 2024
212	Engel Farm (ENF)	United States of America	Inland wetland	Floodplain	37.75	-77.35	46	Noe & Hupp 2009	Henry et al., 2024
213	Holiday Park (HOP)	United States of America	Inland wetland	Floodplain	39	-75.75	102	Noe & Hupp 2009	Henry et al., 2024
214	Mascot (MST)	United States of America	Inland wetland	Floodplain	37.65	-76.65	89	Noe & Hupp 2009	Henry et al., 2024
215	Pampatike (PAM)	United States of America	Inland wetland	Floodplain	37.65	-77.2	87	Noe & Hupp 2009	Henry et al., 2024
216	Porters (POR)	United States of America	Inland wetland	Floodplain	38.25	-75.25	117	Noe & Hupp 2009	Henry et al., 2024
217	Providence Forge (PRF)	United States of America	Inland wetland	Floodplain	37.4	-77.15	164	Noe & Hupp 2009	Henry et al., 2024
218	Red Bridges (REB)	United States of America	Inland wetland	Floodplain	39	-75.75	40	Noe & Hupp 2009	Henry et al., 2024
219	Upham Brook (UPH)	United States of America	Inland wetland	Floodplain	37.6	-77.4	166	Noe & Hupp 2009	Henry et al., 2024
220	Whitons (WHI)	United States of America	Inland wetland	Floodplain	38.25	-75.25	81	Noe & Hupp 2009	Henry et al., 2024
221	Willards (WIL)	United States of America	Inland wetland	Floodplain	38.5	-75.25	68	Noe & Hupp 2009	Henry et al., 2024
222	Acarabixi	Brazil	Inland wetland	Floodplain	-6.21	-50.75	265	Sanders et al. 2017	Henry et al., 2024
223	Araca	Brazil	Inland wetland	Floodplain	-8.17	-62.78	1123	Sanders et al. 2017	Henry et al., 2024
224	Brasileira	Brazil	Inland wetland	Floodplain	-8.17	-62.78	260	Sanders et al. 2017	Henry et al., 2024
225	Calado	Brazil	Inland wetland	Floodplain	-3.09	-60.57	70	Sanders et al. 2017	Henry et al., 2024
226	Calado	Brazil	Inland wetland	Floodplain	-3.09	-60.57	56	Sanders et al. 2017	Henry et al., 2024
227	Calado	Brazil	Inland wetland	Floodplain	-3.09	-60.57	55	Sanders et al. 2017	Henry et al., 2024
228	Calado	Brazil	Inland wetland	Floodplain	-3.09	-60.57	49	Sanders et al. 2017	Henry et al., 2024
229	Calado	Brazil	Inland wetland	Floodplain	-3.09	-60.57	25	Sanders et al. 2017	Henry et al., 2024
230	Calado	Brazil	Inland wetland	Floodplain	-3.09	-60.57	11	Sanders et al. 2017	Henry et al., 2024
231	Conceicao	Brazil	Inland wetland	Floodplain	-8.17	-62.78	662	Sanders et al. 2017	Henry et al., 2024
232	Cristalino	Brazil	Inland wetland	Floodplain	-2	-60.03	28	Sanders et al. 2017	Henry et al., 2024
233	Demarcacao	Brazil	Inland wetland	Floodplain	-8.17	-62.78	500	Sanders et al. 2017	Henry et al., 2024
234	Demarcacao	Brazil	Inland wetland	Floodplain	-8.17	-62.78	365	Sanders et al. 2017	Henry et al., 2024
235	Jacaretinga	Brazil	Inland wetland	Floodplain	-5.43	-60.42	43	Sanders et al. 2017	Henry et al., 2024
236	Lago Verde PA09	Brazil	Inland wetland	Floodplain	-6.21	-50.75	475	Sanders et al. 2017	Henry et al., 2024
237	Nazare	Brazil	Inland wetland	Floodplain	-8.17	-62.78	158	Sanders et al. 2017	Henry et al., 2024
238	Paca	Brazil	Inland wetland	Floodplain	-8.17	-62.78	385	Sanders et al. 2017	Henry et al., 2024
239	Paca	Brazil	Inland wetland	Floodplain	-8.17	-62.78	193	Sanders et al. 2017	Henry et al., 2024
240	Pacoval	Brazil	Inland wetland	Floodplain	-6.21	-50.75	100	Sanders et al. 2017	Henry et al., 2024
241	S. Catarina	Brazil	Inland wetland	Floodplain	-8.17	-62.78	390	Sanders et al. 2017	Henry et al., 2024
242	Santa Ninha	Brazil	Inland wetland	Floodplain	-6.21	-50.75	91	Sanders et al. 2017	Henry et al., 2024
243	Tucunare	Brazil	Inland wetland	Floodplain	-8.17	-62.78	551	Sanders et al. 2017	Henry et al., 2024
244	Axe	United Kingdom	Inland wetland	Floodplain	51	-2.94	114.3	Walling et al. 2006	Henry et al., 2024
245	Culm	United Kingdom	Inland wetland	Floodplain	50.88	-3.37	69.2	Walling et al. 2006	Henry et al., 2024
246	Exe	United Kingdom	Inland wetland	Floodplain	50.86	-3.51	99.5	Walling et al. 2006	Henry et al., 2024
247	Stour	United Kingdom	Inland wetland	Floodplain	50.85	-2.14	80.1	Walling et al. 2006	Henry et al., 2024
248	Torridge	United Kingdom	Inland wetland	Floodplain	50.96	-4.18	91.1	Walling et al. 2006	Henry et al., 2024
249	Usk	United Kingdom	Inland wetland	Floodplain	51.73	-2.95	94.7	Walling et al. 2006	Henry et al., 2024
250	Central big Creek Marsh	Canada	Inland wetland	Freshwater marsh	42.65	80.54	24	Loder et al., 2025	this study

## Sheet: tidal wetland
No	Name	Ecosystem_type	Country	Carbon_gCm2yr	Lat	Lon	Reference	Source
1	NA	Tidal wetland	Canada	37	49.09	-125.73	Chastain et al., 2018	Wang et al., 2021
2	NA	Tidal wetland	Canada	198	49.09	-125.73	Chastain et al., 2018	Wang et al., 2021
3	NA	Tidal wetland	Canada	264	49.14	-125.67	Chastain et al., 2018	Wang et al., 2021
4	NA	Tidal wetland	Canada	156	49.28	-125.28	Chastain et al., 2018	Wang et al., 2021
5	NA	Tidal wetland	Canada	75	49.13	-125.13	Chastain et al., 2018	Wang et al., 2021
6	NA	Tidal wetland	United States of America	100.77	47.53	-124.35	Thom, 1992	Wang et al., 2021
7	NA	Tidal wetland	United States of America	110.15	47.53	-124.35	Thom, 1992	Wang et al., 2021
8	NA	Tidal wetland	United States of America	114	46.84	-124	Thom, 1992	Wang et al., 2021
9	NA	Tidal wetland	United States of America	119.69	46.84	-124	Thom, 1992	Wang et al., 2021
10	Oregon (High marsh )	Tidal wetland	United States of America	83.2857	45.3738	-123.965	Peck et al., 2020	this study
11	Oregon (low marsh)	Tidal wetland	United States of America	51.5	46.1003	-123.783	Peck et al., 2020	this study
12	NA	Tidal wetland	United States of America	76.5	47.1	-122.69	Thom, 1992	Wang et al., 2021
13	NA	Tidal wetland	United States of America	101.53	47.1	-122.69	Thom, 1992	Wang et al., 2021
14	NA	Tidal wetland	United States of America	104.54	47.1	-122.69	Thom, 1992	Wang et al., 2021
15	NA	Tidal wetland	United States of America	108	47.1	-122.69	Thom, 1992	Wang et al., 2021
16	Petaluma River, San Francisco Bay, California, USA	Tidal wetland	United States of America	87.7	38.2	-122.6	Ouyang and Lee, 2014	Henry et al 2024
17	China Camp, San Francisco Bay, California, USA	Tidal wetland	United States of America	141.9	38	-122.5	Ouyang and Lee, 2014	Henry et al 2024
18	NA	Tidal wetland	United States of America	156.81	48.51	-122.49	Thom, 1992	Wang et al., 2021
19	Whale���������s Tail, San Francisco Bay, California, USA	Tidal wetland	United States of America	146.7	37.8	-122.3	Ouyang and Lee, 2014	Henry et al 2024
20	Coon Island, San Francisco Bay, California, USA	Tidal wetland	United States of America	187.5	38.2	-122.3	Ouyang and Lee, 2014	Henry et al 2024
21	Bird Island, San Francisco Bay, California, USA	Tidal wetland	United States of America	54	37.6	-122.2	Ouyang and Lee, 2014	Henry et al 2024
22	Alviso, San Francisco Bay, California, USA	Tidal wetland	United States of America	385	37.5	-122	Ouyang and Lee, 2014	Henry et al 2024
23	Tijuana Slough, California, USA	Tidal wetland	United States of America	43	32.5	-117.1	Ouyang and Lee, 2014	Henry et al 2024
24	Tijuana Slough, California, USA	Tidal wetland	United States of America	343	32.5	-117.1	Ouyang and Lee, 2014	Henry et al 2024
25	Canada	Tidal wetland	Canada	214.3	56.13	-106.35	Ouyang and Lee, 2014	Henry et al 2024
26	Aransas, Texas, USA	Tidal wetland	United States of America	178	28.4	-96.8	Ouyang and Lee, 2014	Henry et al 2024
27	San Bernard, Texas, USA	Tidal wetland	United States of America	203	29.1	-95.6	Ouyang and Lee, 2014	Henry et al 2024
28	McFaddin National Wildlife Refuge, Texas, USA	Tidal wetland	United States of America	95	29.7	-94.1	Ouyang and Lee, 2014	Henry et al 2024
29	Unit 3, Sabine National Wildlife Refuge, Louisiana, USA	Tidal wetland	United States of America	714	29.9	-93.5	Ouyang and Lee, 2014	Henry et al 2024
30	Unit 3, Sabine National Wildlife Refuge, Louisiana, USA	Tidal wetland	United States of America	1713	29.9	-93.5	Ouyang and Lee, 2014	Henry et al 2024
31	Cameron Parish, Louisiana, USA	Tidal wetland	United States of America	41	29.5	-93.2	Ouyang and Lee, 2014	Henry et al 2024
32	Cameron Parish, Louisiana, USA	Tidal wetland	United States of America	115	29.5	-93.2	Ouyang and Lee, 2014	Henry et al 2024
33	Rockefeller Refuge, Louisiana, USA	Tidal wetland	United States of America	27	29.5	-92.7	Ouyang and Lee, 2014	Henry et al 2024
34	Rockefeller Refuge, Louisiana, USA	Tidal wetland	United States of America	309	29.5	-92.7	Ouyang and Lee, 2014	Henry et al 2024
35	Unit15, Rockefeller Wildlife Refuge, Louisiana, USA	Tidal wetland	United States of America	349	29.6	-92.7	Ouyang and Lee, 2014	Henry et al 2024
36	Unit15, Rockefeller Wildlife Refuge, Louisiana, USA	Tidal wetland	United States of America	657	29.6	-92.7	Ouyang and Lee, 2014	Henry et al 2024
37	Unit 14, Rockefeller Wildlife Refuge, Louisiana, USA	Tidal wetland	United States of America	337	29.7	-92.7	Ouyang and Lee, 2014	Henry et al 2024
38	Unit 14, Rockefeller Wildlife Refuge, Louisiana, USA	Tidal wetland	United States of America	448	29.7	-92.7	Ouyang and Lee, 2014	Henry et al 2024
39	Unit 1, Marsh Island Refuge, Louisiana, USA	Tidal wetland	United States of America	318	29.5	-91.9	Ouyang and Lee, 2014	Henry et al 2024
40	Unit 1, Marsh Island Refuge, Louisiana, USA	Tidal wetland	United States of America	763	29.5	-91.9	Ouyang and Lee, 2014	Henry et al 2024
41	Old Oyster Bayou, Louisiana, USA	Tidal wetland	United States of America	84	29.3	-91.1	Ouyang and Lee, 2014	Henry et al 2024
42	Old Oyster Bayou, Louisiana, USA	Tidal wetland	United States of America	602.6	29.3	-91.1	Ouyang and Lee, 2014	Henry et al 2024
43	Fina la-Terre, Louisiana, USA	Tidal wetland	United States of America	18	29	-91	Ouyang and Lee, 2014	Henry et al 2024
44	Fina la-Terre, Louisiana, USA	Tidal wetland	United States of America	136	29	-91	Ouyang and Lee, 2014	Henry et al 2024
45	Bayou Chitigue, Louisiana, USA	Tidal wetland	United States of America	516	29.3	-90.6	Ouyang and Lee, 2014	Henry et al 2024
46	Bayou Chitigue, Louisiana, USA	Tidal wetland	United States of America	669	29.3	-90.6	Ouyang and Lee, 2014	Henry et al 2024
47	Lafourche Parish, Louisiana, USA	Tidal wetland	United States of America	186	29.5	-90.3	Ouyang and Lee, 2014	Henry et al 2024
48	Three Bayous, Louisiana, USA	Tidal wetland	United States of America	116	29.6	-90.1	Ouyang and Lee, 2014	Henry et al 2024
49	Barataria Basin, Louisiana, USA	Tidal wetland	United States of America	71	29.5	-90	Ouyang and Lee, 2014	Henry et al 2024
50	Barataria Basin, Louisiana, USA	Tidal wetland	United States of America	93	29.5	-90	Ouyang and Lee, 2014	Henry et al 2024
51	Barataria Basin, Louisiana, USA	Tidal wetland	United States of America	185	29.5	-90	Ouyang and Lee, 2014	Henry et al 2024
52	Biloxi Bay, Mississippi, USA	Tidal wetland	United States of America	153	30.4	-88.9	Ouyang and Lee, 2014	Henry et al 2024
53	St. Marks, Florida, USA	Tidal wetland	United States of America	44	30.1	-84.2	Ouyang and Lee, 2014	Henry et al 2024
54	Ogeechee River, Georgia Coast, USA	Tidal wetland	United States of America	48.2	31.3	-81.7	Ouyang and Lee, 2014	Henry et al 2024
55	Altamaha River, Georgia Coast, USA	Tidal wetland	United States of America	26.5	31.4	-81.4	Ouyang and Lee, 2014	Henry et al 2024
56	Satilla River, Georgia Coast, USA	Tidal wetland	United States of America	42.9	31.9	-81.2	Ouyang and Lee, 2014	Henry et al 2024
57	NA	Tidal wetland	United States of America	48	32.17	-81.13	Noe et al., 2016	Wang et al., 2021
58	NA	Tidal wetland	United States of America	69	33.34	-79.34	Noe et al., 2016	Wang et al., 2021
59	NA	Tidal wetland	United States of America	205.38	33.32	-79.2	Vogel et al., 1996	Wang et al., 2021
60	NA	Tidal wetland	United States of America	242.6	33.32	-79.19	Vogel et al., 1996	Wang et al., 2021
61	NA	Tidal wetland	United States of America	121.8	33.34	-79.17	Vogel et al., 1996	Wang et al., 2021
62	NA	Tidal wetland	United States of America	100	33.49	-79.17	Drexler et al., 2013	Wang et al., 2021
63	NA	Tidal wetland	United States of America	50	33.54	-79.17	Drexler et al., 2013	Wang et al., 2021
64	NA	Tidal wetland	United States of America	100	33.54	-79.17	Drexler et al., 2013	Wang et al., 2021
65	NA	Tidal wetland	United States of America	120	33.52	-79.16	Drexler et al., 2013	Wang et al., 2021
66	NA	Tidal wetland	United States of America	300	33.52	-79.16	Drexler et al., 2013	Wang et al., 2021
67	NA	Tidal wetland	United States of America	300	33.52	-79.16	Drexler et al., 2013	Wang et al., 2021
68	NA	Tidal wetland	United States of America	400	33.52	-79.15	Drexler et al., 2013	Wang et al., 2021
69	NA	Tidal wetland	United States of America	114.61	37.55	-76.89	Campana, 1998	Wang et al., 2021
70	NA	Tidal wetland	United States of America	174.49	37.55	-76.89	Neubauer et al., 2002	Wang et al., 2021
71	Jacob���������s Creek, North Carolina, USA	Tidal wetland	United States of America	107	35.3	-76.8	Ouyang and Lee, 2014	Henry et al 2024
72	Jacob���������s Creek, North Carolina, USA	Tidal wetland	United States of America	146	35.3	-76.8	Ouyang and Lee, 2014	Henry et al 2024
73	Cedar Island National Wildlife Refuge, North Carolina, USA	Tidal wetland	United States of America	70	35	-76.4	Ouyang and Lee, 2014	Henry et al 2024
74	NA	Tidal wetland	United States of America	77.63	38.42	-76.06	Stevenson et al., 1985	Wang et al., 2021
75	NA	Tidal wetland	United States of America	175.16	38.42	-76.06	Stevenson et al., 1985	Wang et al., 2021
76	MCL8, Chesapeake Bay, Maryland, USA	Tidal wetland	United States of America	279.5	38.3	-75.9	Ouyang and Lee, 2014	Henry et al 2024
77	MC4, Chesapeake Bay, Maryland, USA	Tidal wetland	United States of America	311.2	38.3	-75.9	Ouyang and Lee, 2014	Henry et al 2024
78	MCL15, Chesapeake Bay, Maryland,	Tidal wetland	United States of America	340	38.3	-75.9	Ouyang and Lee, 2014	Henry et al 2024
79	NA	Tidal wetland	United States of America	55.33	37.45	-75.83	Kastler and Wiberg, 1996	Wang et al., 2021
80	NA	Tidal wetland	United States of America	285.24	38.45	-75.83	Ward et al., 1998	Wang et al., 2021
81	NA	Tidal wetland	United States of America	175.3	38.47	-75.82	Ward et al., 1998	Wang et al., 2021
82	NA	Tidal wetland	United States of America	495.67	38.48	-75.82	Ward et al., 1998	Wang et al., 2021
83	NA	Tidal wetland	United States of America	143.66	38.48	-75.81	Ward et al., 1998	Wang et al., 2021
84	NA	Tidal wetland	United States of America	163.46	38.48	-75.81	Ward et al., 1998	Wang et al., 2021
85	NA	Tidal wetland	United States of America	685.9	38.5	-75.8	Ward et al., 1998	Wang et al., 2021
86	NA	Tidal wetland	United States of America	115.92	38.49	-75.79	Ward et al., 1998	Wang et al., 2021
87	NA	Tidal wetland	United States of America	181.06	38.49	-75.79	Ward et al., 1998	Wang et al., 2021
88	NA	Tidal wetland	United States of America	777	38.49	-75.79	Kearney et al., 1986	Wang et al., 2021
89	NA	Tidal wetland	United States of America	85.45	37.47	-75.71	Kastler et al., 1996	Wang et al., 2021
90	Oregon Inlet, North Carolina, USA	Tidal wetland	United States of America	21	35.9	-75.6	Ouyang and Lee, 2014	Henry et al 2024
91	Oregon Inlet, North Carolina, USA	Tidal wetland	United States of America	59	35.9	-75.6	Ouyang and Lee, 2014	Henry et al 2024
92	Kate's Creek Meadow	Tidal wetland	United States of America	250.4	39.62	-75.45	Weston et al., 2014	Wang et al., 2021	10.1007/s10533-014-9989-7
93	Stow Creek	Tidal wetland	United States of America	335.8	39.43	-75.41	Weston et al., 2014	Wang et al., 2021	10.1007/s10533-014-9989-7
94	NA	Tidal wetland	United States of America	197.76	39.77	-75.4	Church et al., 2006	Wang et al., 2021
95	Raccoon Creek	Tidal wetland	United States of America	109.8	39.79	-75.36	Weston et al., 2014	Wang et al., 2021	10.1007/s10533-014-9989-7
96	Prime Hook NWR	Tidal wetland	United States of America	199.5	38.89	-75.3	Boyd et al., 2016	Wang et al., 2021	10.1016/j.ecoleng.2016.03.045
97	Prime Hook NWR	Tidal wetland	United States of America	224.5	38.9	-75.3	Boyd et al., 2016	Wang et al., 2021	10.1016/j.ecoleng.2016.03.045
98	Prime Hook NWR	Tidal wetland	United States of America	148	38.88	-75.28	Boyd et al., 2016	Wang et al., 2021	10.1016/j.ecoleng.2016.03.045
99	Prime Hook NWR	Tidal wetland	United States of America	31.24	38.87	-75.27	Boyd et al., 2016	Wang et al., 2021	10.1016/j.ecoleng.2016.03.045
100	Prime Hook NWR	Tidal wetland	United States of America	168	38.83	-75.26	Boyd et al., 2016	Wang et al., 2021	10.1016/j.ecoleng.2016.03.045
101	Prime Hook NWR	Tidal wetland	United States of America	38.11	38.86	-75.26	Boyd et al., 2016	Wang et al., 2021	10.1016/j.ecoleng.2016.03.045
102	Prime Hook NWR	Tidal wetland	United States of America	157	38.87	-75.26	Boyd et al., 2016	Wang et al., 2021	10.1016/j.ecoleng.2016.03.045
103	Prime Hook NWR	Tidal wetland	United States of America	169	38.85	-75.25	Boyd et al., 2016	Wang et al., 2021	10.1016/j.ecoleng.2016.03.045
104	Prime Hook NWR	Tidal wetland	United States of America	177	38.83	-75.23	Boyd et al., 2016	Wang et al., 2021	10.1016/j.ecoleng.2016.03.045
105	Prime Hook NWR	Tidal wetland	United States of America	180	38.81	-75.21	Boyd et al., 2016	Wang et al., 2021	10.1016/j.ecoleng.2016.03.045
106	Prime Hook NWR	Tidal wetland	United States of America	187.26	38.81	-75.21	Boyd et al., 2016	Wang et al., 2021	10.1016/j.ecoleng.2016.03.045
107	Prime Hook NWR	Tidal wetland	United States of America	186	38.81	-75.2	Boyd et al., 2016	Wang et al., 2021	10.1016/j.ecoleng.2016.03.045
108	NA	Tidal wetland	United States of America	487.43	39.86	-75.18	Church et al., 2006	Wang et al., 2021
109	NA	Tidal wetland	United States of America	100	39.86	-75.17	Orson et al., 1990	Wang et al., 2021
110	NA	Tidal wetland	United States of America	128	39.86	-75.17	Orson et al., 1990	Wang et al., 2021
111	NA	Tidal wetland	United States of America	130	39.86	-75.17	Orson et al., 1990	Wang et al., 2021
112	NA	Tidal wetland	United States of America	267.3	38.79	-75.16	Chrzastowski et al., 1987	Wang et al., 2021
113	NA	Tidal wetland	United States of America	273.24	38.79	-75.16	Church et al., 1981	Wang et al., 2021
114	J1, Little Assawoman Bay, Delaware, USA	Tidal wetland	United States of America	119	38.4	-75.1	Ouyang and Lee, 2014	Henry et al 2024
115	SA4, Little Assawoman Bay, Delaware, USA USA	Tidal wetland	United States of America	154	38.4	-75.1	Ouyang and Lee, 2014	Henry et al 2024
116	NA	Tidal wetland	United States of America	152	39.54	-74.43	Darke et al., 2015	Wang et al., 2021
117	NA	Tidal wetland	United States of America	118	39.51	-74.42	Darke et al., 2015	Wang et al., 2021
118	NA	Tidal wetland	United States of America	132	40.56	-74.27	Sturdevant et al., 2002	Wang et al., 2021
119	NA	Tidal wetland	United States of America	142	40.56	-74.27	Sturdevant et al., 2002	Wang et al., 2021
120	NA	Tidal wetland	United States of America	97.5	40.57	-74.27	Sturdevant et al., 2002	Wang et al., 2021
121	NA	Tidal wetland	United States of America	160	40.57	-74.27	Sturdevant et al., 2002	Wang et al., 2021
122	Hackensack River tidal salt marsh	Tidal wetland	United States of America	192	40.81	-74.05	Artigas et al., 2015	Wang et al., 2021	10.1016/j.agrformet.2014.09.012
123	NA	Tidal wetland	United States of America	87.25	40.96	-73.14	Flessa et al., 1977	Wang et al., 2021
124		Tidal wetland	Ireland	146	40.96	-73.14	Armentano et al., 1975	Wang et al., 2021
125	NA	Tidal wetland	United States of America	196	40.96	-73.14	Armentano et al., 1975	Wang et al., 2021
126	NA	Tidal wetland	United States of America	196.86	40.96	-73.14	Armentano et al., 1975	Wang et al., 2021
127	NA	Tidal wetland	United States of America	216.13	40.96	-73.14	Armentano et al., 1975	Wang et al., 2021
128	NA	Tidal wetland	United States of America	121.5	40.71	-72.95	Corman et al., 2012	Wang et al., 2021
129	NA	Tidal wetland	United States of America	151.8	40.71	-72.95	Corman et al., 2012	Wang et al., 2021
130	Farm River, Connecticut, USA	Tidal wetland	United States of America	70	41.2	-72.9	Ouyang and Lee, 2014	Henry et al 2024
131	NA	Tidal wetland	United States of America	93	40.77	-72.89	Darke et al., 2015	Wang et al., 2021
132	NA	Tidal wetland	United States of America	114	40.77	-72.89	Darke et al., 2015	Wang et al., 2021
133	Sluice Core 2, Connecticut, USA	Tidal wetland	United States of America	85	41.2	-72.7	Ouyang and Lee, 2014	Henry et al 2024
134	Leetes 2, Connecticut, USA	Tidal wetland	United States of America	93	41.2	-72.7	Ouyang and Lee, 2014	Henry et al 2024
135	Sluice 1, Connecticut, USA	Tidal wetland	United States of America	99	41.2	-72.7	Ouyang and Lee, 2014	Henry et al 2024
136	East River 1, Connecticut, USA	Tidal wetland	United States of America	134	41.2	-72.7	Ouyang and Lee, 2014	Henry et al 2024
137	Leetes 1, Connecticut, USA	Tidal wetland	United States of America	153	41.2	-72.7	Ouyang and Lee, 2014	Henry et al 2024
138	East River 2, Connecticut, USA	Tidal wetland	United States of America	204	41.2	-72.7	Ouyang and Lee, 2014	Henry et al 2024
139	Sybil 2, Connecticut, USA	Tidal wetland	United States of America	72	41.2	-72.6	Ouyang and Lee, 2014	Henry et al 2024
140	Sybil 3, Connecticut, USA	Tidal wetland	United States of America	116	41.2	-72.6	Ouyang and Lee, 2014	Henry et al 2024
141	Sybil 1, Connecticut, USA	Tidal wetland	United States of America	136	41.2	-72.6	Ouyang and Lee, 2014	Henry et al 2024
142	Brandford River 2, Connecticut, USA	Tidal wetland	United States of America	181	41.2	-72.6	Ouyang and Lee, 2014	Henry et al 2024
143	Brandford River 1, Connecticut, USA	Tidal wetland	United States of America	182	41.2	-72.6	Ouyang and Lee, 2014	Henry et al 2024
144	Hoadley 3, Connecticut, USA	Tidal wetland	United States of America	114	41.2	-72	Ouyang and Lee, 2014	Henry et al 2024
145	Hoadley 1, Connecticut, USA	Tidal wetland	United States of America	154	41.2	-72	Ouyang and Lee, 2014	Henry et al 2024
146	Hoadley 2, Connecticut, USA	Tidal wetland	United States of America	169	41.2	-72	Ouyang and Lee, 2014	Henry et al 2024
147	Bloom���������s Point-in, Little Narragansett Bay, Connecticut, USA	Tidal wetland	United States of America	81.6	41.3	-71.9	Ouyang and Lee, 2014	Henry et al 2024
148	Bloom���������s Point-out, Little Narragansett Bay, Connecticut, USA	Tidal wetland	United States of America	83.8	41.3	-71.9	Ouyang and Lee, 2014	Henry et al 2024
149	NA	Tidal wetland	United States of America	139.21	41.2	-71.59	Cary et al., 2015	Wang et al., 2021
150	NA	Tidal wetland	United States of America	237.82	41.69	-71.45	Cary et al., 2015	Wang et al., 2021
151	NA	Tidal wetland	United States of America	342.23	41.51	-71.37	Cary et al., 2015	Wang et al., 2021
152	NA	Tidal wetland	United States of America	133.41	41.73	-71.33	Cary et al., 2015	Wang et al., 2021
153	NA	Tidal wetland	United States of America	95.32	41.63	-71.32	Donnelly et al., 2001	Wang et al., 2021
154	NA	Tidal wetland	United States of America	123.92	41.63	-71.32	Donnelly et al., 2001	Wang et al., 2021
155	NA	Tidal wetland	United States of America	133.45	41.63	-71.32	Donnelly et al., 2001	Wang et al., 2021
156	NA	Tidal wetland	United States of America	144.47	41.63	-71.32	Donnelly et al., 2001	Wang et al., 2021
157	NA	Tidal wetland	United States of America	168.21	41.63	-71.32	Cary et al., 2015	Wang et al., 2021
158	Rhode Island, USA	Tidal wetland	United States of America	165	41.4	-71.3	Ouyang and Lee, 2014	Henry et al 2024
159	NA	Tidal wetland	United States of America	68.54	41.72	-71.3	Donnelly et al., 2001	Wang et al., 2021
160	NA	Tidal wetland	United States of America	109.9	41.72	-71.3	Donnelly et al., 2001	Wang et al., 2021
161	NA	Tidal wetland	United States of America	57.11	42.73	-70.84	Semien et al., 2012	Wang et al., 2021
162	NA	Tidal wetland	United States of America	73.25	42.73	-70.84	Semien et al., 2012	Wang et al., 2021
163	NA	Tidal wetland	United States of America	79.48	42.73	-70.84	Semien et al., 2012	Wang et al., 2021
164	NA	Tidal wetland	United States of America	170	42.76	-70.81	Darke et al., 2015	Wang et al., 2021
165	NA	Tidal wetland	United States of America	116	42.78	-70.81	Darke et al., 2015	Wang et al., 2021
166	NA	Tidal wetland	United States of America	95	43.27	-70.59	Darke et al., 2015	Wang et al., 2021
167	NA	Tidal wetland	United States of America	90.85	41.56	-70.58	Gonneea et al., 2018	Wang et al., 2021
168	NA	Tidal wetland	United States of America	114.55	41.56	-70.58	Gonneea et al., 2018	Wang et al., 2021
169	NA	Tidal wetland	United States of America	139.33	41.56	-70.58	Gonneea et al., 2018	Wang et al., 2021
170	NA	Tidal wetland	United States of America	41	43.32	-70.57	Darke et al., 2015	Wang et al., 2021
171	NA	Tidal wetland	United States of America	93.67	41.56	-70.54	Gonneea et al., 2018	Wang et al., 2021
172	NA	Tidal wetland	United States of America	111.5	41.56	-70.54	Gonneea et al., 2018	Wang et al., 2021
173	NA	Tidal wetland	United States of America	53.12	41.55	-70.51	Gonneea et al., 2018	Wang et al., 2021
174	NA	Tidal wetland	United States of America	118.38	41.55	-70.51	Gonneea et al., 2018	Wang et al., 2021
175	NA	Tidal wetland	United States of America	121.72	41.55	-70.51	Gonneea et al., 2018	Wang et al., 2021
176	NA	Tidal wetland	United States of America	95.89	41.58	-70.5	Gonneea et al., 2018	Wang et al., 2021
177	NA	Tidal wetland	United States of America	120.96	41.58	-70.5	Gonneea et al., 2018	Wang et al., 2021
178	NA	Tidal wetland	United States of America	122.89	41.58	-70.5	Gonneea et al., 2018	Wang et al., 2021
179	NA	Tidal wetland	United States of America	54.52	43.56	-70.35	Goodman et al., 2007	Wang et al., 2021
180	NA	Tidal wetland	United States of America	112.09	43.56	-70.35	Goodman et al., 2007	Wang et al., 2021
181	Inlet 1, Nauset Bay, Massachusetts, USA	Tidal wetland	United States of America	105	41.5	-70	Ouyang and Lee, 2014	Henry et al 2024
182	Nauset Bay, Massachusetts, USA	Tidal wetland	United States of America	155	41.5	-70	Ouyang and Lee, 2014	Henry et al 2024
183	The Great Sippewissett Marsh, Massachusetts, USA	Tidal wetland	United States of America	88.8	41.6	-70	Ouyang and Lee, 2014	Henry et al 2024
184	NA	Tidal wetland	United States of America	55.09	43.87	-69.98	Goodman et al., 2007	Wang et al., 2021
185	NA	Tidal wetland	United States of America	256.5	41.83	-69.95	Roman et al., 1997	Wang et al., 2021
186	NA	Tidal wetland	United States of America	131.1	41.84	-69.95	Roman et al., 1997	Wang et al., 2021
187	NA	Tidal wetland	United States of America	193.8	41.84	-69.95	Roman et al., 1997	Wang et al., 2021
188	The Sprague River Marsh, Maine, USA	Tidal wetland	United States of America	40	43.8	-69.8	Ouyang and Lee, 2014	Henry et al 2024
189	Maine	Tidal wetland	United States of America	120.15	44.04	-69.61	Goodman et al., 2007	Wang et al., 2021
190	Maine	Tidal wetland	United States of America	51.69	43.94	-69.57	Goodman et al., 2007	Wang et al., 2021
191	Maine	Tidal wetland	United States of America	117.28	43.98	-69.57	Goodman et al., 2007	Wang et al., 2021
192	Maine	Tidal wetland	United States of America	137.71	44.02	-69.55	Goodman et al., 2007	Wang et al., 2021
193	Maine	Tidal wetland	United States of America	135.79	44.54	-67.63	Goodman et al., 2007	Wang et al., 2021
194	Maine	Tidal wetland	United States of America	59.1	44.63	-67.38	Goodman et al., 2007	Wang et al., 2021
195	Bocabec River, Bay of Fundy, New Brunswick, Canada	Tidal wetland	Canada	113	45.1	-67	Ouyang and Lee, 2014	Henry et al 2024
196	Bocabec River, Bay of Fundy, New Brunswick, Canada	Tidal wetland	Canada	456	45.1	-67	Ouyang and Lee, 2014	Henry et al 2024
197	NA	Tidal wetland	United States of America	282.15	45.16	-66.98	Hung et al., 2006	Wang et al., 2021
198	Little Lepreau, Bay of Fundy, New Brunswick, Canada	Tidal wetland	Canada	89	45.1	-66.5	Ouyang and Lee, 2014	Henry et al 2024
199	Cheboque Harbour, Gulf of Maine, Nova Scotia, Canada	Tidal wetland	Canada	75	43.8	-66.4	Ouyang and Lee, 2014	Henry et al 2024
200	Dipper d, Dipper Harbour, Bay of Fundy, New Brunswick, Canada	Tidal wetland	Canada	60	45.1	-66.4	Ouyang and Lee, 2014	Henry et al 2024
201	DH Sp 2, Dipper Harbour, Bay of Fundy, New Brunswick, Canada	Tidal wetland	Canada	64	45.1	-66.4	Ouyang and Lee, 2014	Henry et al 2024
202	DH Sp 1, Dipper Harbour, Bay of Fundy, New Brunswick, Canada	Tidal wetland	Canada	77	45.1	-66.4	Ouyang and Lee, 2014	Henry et al 2024
203	Dipper a, Dipper Harbour, Bay of Fundy, New Brunswick, Canada	Tidal wetland	Canada	85	45.1	-66.4	Ouyang and Lee, 2014	Henry et al 2024
204	DH Sp 3, Dipper Harbour, Bay of Fundy, New Brunswick, Canada	Tidal wetland	Canada	85	45.1	-66.4	Ouyang and Lee, 2014	Henry et al 2024
205	Dipper Harbour, Bay of Fundy, New Brunswick, Canada	Tidal wetland	Canada	94	45.1	-66.4	Ouyang and Lee, 2014	Henry et al 2024
206	Dipper Harbour, Bay of Fundy, New Brunswick, Canada	Tidal wetland	Canada	156.6	45.1	-66.4	Ouyang and Lee, 2014	Henry et al 2024
207	DH SA 2, Dipper Harbour, Bay of Fundy, New Brunswick, Canada	Tidal wetland	Canada	182	45.1	-66.4	Ouyang and Lee, 2014	Henry et al 2024
208	DH SA 3, Dipper Harbour, Bay of Fundy, New Brunswick, Canada	Tidal wetland	Canada	187	45.1	-66.4	Ouyang and Lee, 2014	Henry et al 2024
209	DH SA 1, Dipper Harbour, Bay of Fundy, New Brunswick, Canada	Tidal wetland	Canada	195	45.1	-66.4	Ouyang and Lee, 2014	Henry et al 2024
210	Dipper Harbour, Bay of Fundy, New Brunswick, Canada	Tidal wetland	Canada	445	45.1	-66.4	Ouyang and Lee, 2014	Henry et al 2024
211	Chance Harbour, Bay of Fundy, New Brunswick, Canada	Tidal wetland	Canada	72	45.1	-66.3	Ouyang and Lee, 2014	Henry et al 2024
212	Lorneville, Bay of Fundy, New Brunswick, Canada	Tidal wetland	Canada	277	45.2	-66.2	Ouyang and Lee, 2014	Henry et al 2024
213	Lorneville, Bay of Fundy, New Brunswick, Canada	Tidal wetland	Canada	330	45.2	-66.2	Ouyang and Lee, 2014	Henry et al 2024
214	Little River Harbour, Gulf of Maine, Nova Scotia, Canada	Tidal wetland	Canada	304	43.7	-66.1	Ouyang and Lee, 2014	Henry et al 2024
215	Yarmouth, Nova Scotia, Canada	Tidal wetland	Canada	101.1	43.8	-66.1	Ouyang and Lee, 2014	Henry et al 2024
216	St. martins, Bay of Fundy, New Brunswick, Canada	Tidal wetland	Canada	265	45.3	-65.5	Ouyang and Lee, 2014	Henry et al 2024
217	St. martins, Bay of Fundy, new Brunswick, Canada	Tidal wetland	Canada	928	45.3	-65.5	Ouyang and Lee, 2014	Henry et al 2024
218	Pubnico Harbour, Gulf of Maine, Nova Scotia, Canada	Tidal wetland	Canada	113	43.6	-65.3	Ouyang and Lee, 2014	Henry et al 2024
219	Tabusintac Bay, Gulf of St. Lawrence, New Brunswick, Canada	Tidal wetland	Canada	66	47.4	-65	Ouyang and Lee, 2014	Henry et al 2024
220	Eastport, Maine, USA	Tidal wetland	Canada	78.3	45.1	-64.9	Ouyang and Lee, 2014	Henry et al 2024
221	Kouchigouguacis Lagoon, Gulf of St. Lawrence, New Brunswick, Canada	Tidal wetland	Canada	102	46.7	-64.9	Ouyang and Lee, 2014	Henry et al 2024
222	Bay St-Louis, New Brunswick, Canada	Tidal wetland	Canada	93	46.8	-64.9	Ouyang and Lee, 2014	Henry et al 2024
223	Kouchibouguacis Lagoon, Gulf of St. Lawrence, New Brunswick, Canada	Tidal wetland	Canada	272.6	46.8	-64.9	Ouyang and Lee, 2014	Henry et al 2024
224	Escuminac, Gulf of St. Lawrence, New Brunswick, Canada	Tidal wetland	Canada	89.1	47.1	-64.9	Ouyang and Lee, 2014	Henry et al 2024
225	Cape Enrage, Bay of Fundy, New Brunswick, Canada	Tidal wetland	Canada	186	45.6	-64.8	Ouyang and Lee, 2014	Henry et al 2024
226	Cape Enrage, Bay of Fundy, New Brunswick, Canada	Tidal wetland	Canada	582	45.6	-64.8	Ouyang and Lee, 2014	Henry et al 2024
227	Wood Point, Bay of Fundy, New Brunswick, Canada	Tidal wetland	Canada	253	45.8	-64.4	Ouyang and Lee, 2014	Henry et al 2024
228	Wood Point, Bay of Fundy, New Brunswick, Canada	Tidal wetland	Canada	264	45.8	-64.4	Ouyang and Lee, 2014	Henry et al 2024
229	Malpeque Bay, Gulf of St. Lawrence, Prince Edward Island, Canada	Tidal wetland	Canada	71	46.5	-63.7	Ouyang and Lee, 2014	Henry et al 2024
230	Rustico, Prince Edward Island, Canada	Tidal wetland	Canada	94.5	46.5	-63.6	Ouyang and Lee, 2014	Henry et al 2024
231	Halifax, Nova Scotia, Canada	Tidal wetland	Canada	132.2	44.7	-63.5	Ouyang and Lee, 2014	Henry et al 2024
232	Lawrencetown Lake, Nova Scotia, Canada	Tidal wetland	Canada	60	44.7	-63.4	Ouyang and Lee, 2014	Henry et al 2024
233	Chezzetcook Inlet, Nova Scotia, Canada	Tidal wetland	Canada	106	44.7	-63.4	Ouyang and Lee, 2014	Henry et al 2024
234	Cole Harbour, Nova Scotia, Canada	Tidal wetland	Canada	161	44.7	-63.4	Ouyang and Lee, 2014	Henry et al 2024
235	Brackley Bay, Gulf of St. Lawrence, Prince Edward Island, Canada	Tidal wetland	Canada	89	46.4	-63.2	Ouyang and Lee, 2014	Henry et al 2024
236	Rustico Bay, Prince Edward Island, Canada	Tidal wetland	Canada	125	46.4	-63.2	Ouyang and Lee, 2014	Henry et al 2024
237	Flakkerhuk, Disko, Greenland	Tidal wetland	Greenland	30	69.7	-52	Ouyang and Lee, 2014	Henry et al 2024
238	Pancas, the Tagus estuary, Portugal	Tidal wetland	Portugal	330	38.8	-8.9	Ouyang and Lee, 2014	Henry et al 2024
239	Corroios, the Tagus estuary, Portugal	Tidal wetland	Portugal	750	38.8	-8.9	Ouyang and Lee, 2014	Henry et al 2024
240	Mondego	Tidal wetland	Portugal	47.695	40.1325	-8.85182	Mazarrasa et al., 2023	this study
241	The Mondego estuary, Portugal	Tidal wetland	Portugal	218	40.1	-8.6	Ouyang and Lee, 2014	Henry et al 2024
242	Ria Formosa Lagoon, Portugal	Tidal wetland	Portugal	49.87	36.99	-7.89	Bianchi et al. 2013	this study
243	European Atlantic basin, Iberian Peninsula	Tidal wetland	Iberian Peninsula	323.9	37.2	-6.9	Ouyang and Lee, 2014	Henry et al 2024
244	The Palmones River estuary, Spain	Tidal wetland	Spain	560	36.2	-5.4	Ouyang and Lee, 2014	Henry et al 2024
245	Loch Laich 2	Tidal wetland	United Kingdom	39.9283	56.5666	-5.37378	Smeaton et al., 2023	this study
246	Loch Laich 1	Tidal wetland	United Kingdom	25.2365	56.567	-5.37246	Smeaton et al., 2023	this study
247	Kyle of Tongue 1	Tidal wetland	United Kingdom	76.6819	58.4472	-4.47813	Smeaton et al., 2023	this study
248	WI-C03	Tidal wetland	United Kingdom	160.8	54.8708	-4.43094	Miller et al., 2022	this study
249	Wigtown 9	Tidal wetland	United Kingdom	186.587	54.8708	-4.43094	Smeaton et al., 2023	this study
250	Wigtown B	Tidal wetland	United Kingdom	32.8851	54.8706	-4.42724	Smeaton et al., 2023	this study
251	Wigtown 3	Tidal wetland	United Kingdom	80.1806	54.8722	-4.42473	Smeaton et al., 2023	this study
252	WI-C09	Tidal wetland	United Kingdom	235.4	54.8722	-4.42473	Miller et al., 2022	this study
253	Oyambre	Tidal wetland	Spain	87.3033	43.3862	-4.38915	Mazarrasa et al., 2023	this study
254	Malltraeth 1	Tidal wetland	United Kingdom	55.7621	53.1664	-4.38798	Smeaton et al., 2023	this study
255	Llanrhidian 6	Tidal wetland	United Kingdom	107.266	51.6158	-4.16926	Smeaton et al., 2023	this study
256	DR-C32	Tidal wetland	United Kingdom	61.9	57.8654	-4.02	Miller et al., 2022	this study
257	Dornoch Point 24	Tidal wetland	United Kingdom	109.298	57.8654	-4.02	Smeaton et al., 2023	this study
258	DR-C24	Tidal wetland	United Kingdom	31.6	57.8632	-4.01901	Miller et al., 2022	this study
259	Dornoch Point 32	Tidal wetland	United Kingdom	75.4539	57.8632	-4.01901	Smeaton et al., 2023	this study
260	MR-C45	Tidal wetland	United Kingdom	29.1	57.8259	-3.92302	Miller et al., 2022	this study
261	Morrich More 45	Tidal wetland	United Kingdom	38.4766	57.8259	-3.92302	Smeaton et al., 2023	this study
262	Avon 6	Tidal wetland	United Kingdom	92.056	50.3025	-3.85434	Smeaton et al., 2023	this study
263	Santander Bay	Tidal wetland	Spain	37.98	43.4504	-3.76843	Mazarrasa et al., 2023	this study
264	Skinflats 1	Tidal wetland	United Kingdom	99.0553	56.0582	-3.73633	Smeaton et al., 2023	this study
265	Skinflats 2	Tidal wetland	United Kingdom	90.9238	56.0585	-3.73453	Smeaton et al., 2023	this study
266	SK-C02	Tidal wetland	United Kingdom	151.9	56.0585	-3.73453	Miller et al., 2022	this study
267	SK-C04	Tidal wetland	United Kingdom	142.5	56.0633	-3.7324	Miller et al., 2022	this study
268	Skinflats 4	Tidal wetland	United Kingdom	157.818	56.0633	-3.7324	Smeaton et al., 2023	this study
269	Caerlaverock 10	Tidal wetland	United Kingdom	51.7651	54.9706	-3.52004	Smeaton et al., 2023	this study
270	Caerlaverock 16	Tidal wetland	United Kingdom	106.394	54.9684	-3.51587	Smeaton et al., 2023	this study
271	Santo��a Marshes	Tidal wetland	Spain	51.01	43.4326	-3.46918	Mazarrasa et al., 2023	this study
272	Tay 1	Tidal wetland	United Kingdom	127.073	56.4372	-3.10243	Smeaton et al., 2023	this study
273	Waulkmill 2	Tidal wetland	United Kingdom	81.6662	58.942	-3.08368	Smeaton et al., 2023	this study
274	Sunderland 5	Tidal wetland	United Kingdom	66.3568	54.0031	-2.89432	Smeaton et al., 2023	this study
275	Sunderland 1	Tidal wetland	United Kingdom	64.6002	54.0033	-2.88851	Smeaton et al., 2023	this study
276	Black Rock 1	Tidal wetland	United Kingdom	80.9856	51.5989	-2.69623	Smeaton et al., 2023	this study
277	Black Rock 5	Tidal wetland	United Kingdom	157.058	51.5984	-2.69521	Smeaton et al., 2023	this study
278	Arne 16	Tidal wetland	United Kingdom	88.1111	50.6904	-2.02659	Smeaton et al., 2023	this study
279	Lindisfarne 1	Tidal wetland	United Kingdom	67.393	55.6811	-1.84341	Smeaton et al., 2023	this study
280	Newton 8	Tidal wetland	United Kingdom	50.76	50.7163	-1.39445	Smeaton et al., 2023	this study
281	Newton 14	Tidal wetland	United Kingdom	59.5615	50.7167	-1.39405	Smeaton et al., 2023	this study
282	Sample 2	Tidal wetland	Canada	66	52	-0.7	Ouyang and Lee, 2014	Henry et al 2024
283	The Blackwater estuary, UK	Tidal wetland	United Kingdom	96.4	52	-0.7	Ouyang and Lee, 2014	Henry et al 2024
284	Sample 1	Tidal wetland	United Kingdom	126.8	52	-0.7	Ouyang and Lee, 2014	Henry et al 2024
285	The Humber estuary, England	Tidal wetland	United Kingdom	793	53.7	-0.1	Ouyang and Lee, 2014	Henry et al 2024
286	The Humber estuary, England	Tidal wetland	United Kingdom	1133	53.7	-0.1	Ouyang and Lee, 2014	Henry et al 2024
287	Welwick 1	Tidal wetland	United Kingdom	171.627	53.6488	0.0253216	Smeaton et al., 2023	this study
288	Welwick 2	Tidal wetland	United Kingdom	69.2585	53.6468	0.0267533	Smeaton et al., 2023	this study
289	Gedney 5	Tidal wetland	United Kingdom	122.509	52.8397	0.193768	Smeaton et al., 2023	this study
290	Hut marsh, UK	Tidal wetland	UK	77	53	0.7	Ouyang and Lee, 2014	Henry et al 2024
291	Hut marsh, UK	Tidal wetland	UK	165	53	0.7	Ouyang and Lee, 2014	Henry et al 2024
292	Alfacs	Tidal wetland	Spain	367	40.7315	0.844905	Fennessy et al., 2019	this study
293	Orplands 8	Tidal wetland	United Kingdom	43.7299	51.7176	0.857089	Smeaton et al., 2023	this study
294	Orplands 7	Tidal wetland	United Kingdom	77.8487	51.7172	0.857557	Smeaton et al., 2023	this study
295	Dengie Marsh, UK	Tidal wetland	United Kingdom	139	51.7	0.9	Ouyang and Lee, 2014	Henry et al 2024
296	Dengie Marsh, UK	Tidal wetland	UK	187	51.7	0.9	Ouyang and Lee, 2014	Henry et al 2024
297	Stiffkey Marsh, UK	Tidal wetland	United Kingdom	110	52.9	0.9	Ouyang and Lee, 2014	Henry et al 2024
298	Stiffkey Marsh, UK	Tidal wetland	United Kingdom	159	52.9	0.9	Ouyang and Lee, 2014	Henry et al 2024
299	Stiffkey 2	Tidal wetland	United Kingdom	76.5455	52.9577	0.920885	Smeaton et al., 2023	this study
300	Stiffkey 7	Tidal wetland	United Kingdom	64.8687	52.9648	0.922483	Smeaton et al., 2023	this study
301	NA	Tidal wetland	Belgium	23.35	51.35	3.72	Temmerman et al., 2003	Wang et al., 2021
302	NA	Tidal wetland	Belgium	60.71	51.35	3.72	Temmerman et al., 2003	Wang et al., 2021
303	NA	Tidal wetland	Belgium	93.4	51.35	3.72	Temmerman et al., 2003	Wang et al., 2021
304	NA	Tidal wetland	Belgium	96.9	51.35	3.72	Temmerman et al., 2003	Wang et al., 2021
305	NA	Tidal wetland	Belgium	121.42	51.35	3.72	Temmerman et al., 2003	Wang et al., 2021
306	NA	Tidal wetland	Belgium	173.96	51.35	3.72	Temmerman et al., 2003	Wang et al., 2021
307	NA	Tidal wetland	Belgium	198.48	51.35	3.72	Temmerman et al., 2003	Wang et al., 2021
308	NA	Tidal wetland	Belgium	262.69	51.35	3.72	Temmerman et al., 2003	Wang et al., 2021
309	NA	Tidal wetland	Belgium	296.55	51.35	3.72	Temmerman et al., 2003	Wang et al., 2021
310	NA	Tidal wetland	Belgium	467	51.35	3.72	Temmerman et al., 2003	Wang et al., 2021
311	NA	Tidal wetland	Belgium	1167.5	51.35	3.72	Temmerman et al., 2003	Wang et al., 2021
312	St. Annaland, Netherlands	Tidal wetland	Netherlands	139	51.5	4.1	Ouyang and Lee, 2014	Henry et al 2024
313	St. Annaland, Netherlands	Tidal wetland	Netherlands	277	51.5	4.1	Ouyang and Lee, 2014	Henry et al 2024
314	Scheldt, Netherlands	Tidal wetland	Netherlands	587	51.5	4.1	Ouyang and Lee, 2014	Henry et al 2024
315	Scheldt, Netherlands	Tidal wetland	Netherlands	650	51.5	4.1	Ouyang and Lee, 2014	Henry et al 2024
316	NA	Tidal wetland	Belgium	61.35	51.12	4.27	Temmerman et al., 2003	Wang et al., 2021
317	Schedlt	Tidal wetland	Belgium	153.38	51.12	4.27	Temmerman et al., 2003	Wang et al., 2021
318	Schedlt	Tidal wetland	Belgium	168.71	51.12	4.27	Temmerman et al., 2003	Wang et al., 2021
319	NA	Tidal wetland	Belgium	230.06	51.12	4.27	Temmerman et al., 2003	Wang et al., 2021
320	NA	Tidal wetland	Belgium	306.75	51.12	4.27	Temmerman et al., 2003	Wang et al., 2021
321	NA	Tidal wetland	Belgium	766.88	51.12	4.27	Temmerman et al., 2003	Wang et al., 2021
322	Impounded sites, Rhone Delta, France	Tidal wetland	France	72.1	43.3	4.6	Ouyang and Lee, 2014	Henry et al 2024
323	Marine sites, Rhone Delta, France	Tidal wetland	France	87.9	43.3	4.6	Ouyang and Lee, 2014	Henry et al 2024
324	Riverine sites, Rhone Delta, France	Tidal wetland	France	356.6	43.3	4.6	Ouyang and Lee, 2014	Henry et al 2024
325	The peninsula Skallingen, the Wadden Sea, Denmark	Tidal wetland	Denmark	52.8	55.5	8.3	Ouyang and Lee, 2014	Henry et al 2024
326	NA	Tidal wetland	Germany	287	53.97	8.88	Butzeck et al., 2015	Wang et al., 2021
327	NA	Tidal wetland	Germany	48	53.9	9.03	Butzeck et al., 2015	Wang et al., 2021
328	NA	Tidal wetland	Germany	169	53.9	9.03	Butzeck et al., 2015	Wang et al., 2021
329	NA	Tidal wetland	Germany	810.75	53.9	9.03	Butzeck et al., 2015	Wang et al., 2021
330	NA	Tidal wetland	Germany	170	53.65	9.55	Butzeck et al., 2015	Wang et al., 2021
331	NA	Tidal wetland	Germany	405	53.65	9.55	Butzeck et al., 2015	Wang et al., 2021
332	Horsens nongrazed, Denmark	Tidal wetland	Denmark	22	55.8412	9.89702	Graversen et al., 2022	this study
333	Horsens grazed, Denmark	Tidal wetland	Denmark	45	55.8412	9.89702	Graversen et al., 2022	this study
334	Mariager nongrazed, Denmark	Tidal wetland	Denmark	5.6	56.6461	9.92823	Graversen et al., 2022	this study
335	Mariager grazed, Denmark	Tidal wetland	Denmark	9.1	56.6461	9.92823	Graversen et al., 2022	this study
336	Randers nongrazed, Denmark	Tidal wetland	Denmark	15.3	56.4734	10.2054	Graversen et al., 2022	this study
337	Randers grazed, Denmark	Tidal wetland	Denmark	17	56.4734	10.2054	Graversen et al., 2022	this study
338	Oder River, Poland	Tidal wetland	Poland	107	54.3	14.6	Ouyang and Lee, 2014	Henry et al 2024
339	Oder River, Poland	Tidal wetland	Poland	148	54.3	14.6	Ouyang and Lee, 2014	Henry et al 2024
340	Vistula River, Poland	Tidal wetland	Poland	254	54.3	18.9	Ouyang and Lee, 2014	Henry et al 2024
341	Vistula River, Poland	Tidal wetland	Poland	381	54.3	18.9	Ouyang and Lee, 2014	Henry et al 2024
342	Storslett, Norway	Tidal wetland	Norway	365	69.2713	19.9266	Ward et al., 2020	this study
343	Storfjord, Norway	Tidal wetland	Norway	326	69.4959	20.8204	Ward et al., 2020	this study
344	Stabbursnes, Norway	Tidal wetland	Norway	263.5	69.7819	20.9953	Ward et al., 2020	this study
345	Alta, Norway	Tidal wetland	Norway	20.5	69.9783	23.4315	Ward et al., 2020	this study
346	Birtvarre, Norway	Tidal wetland	Norway	30.5	70.1942	24.9275	Ward et al., 2020	this study
347	NA	Tidal wetland	Saudi Arabia	5.1	27.3	49.48	Saderne et al., 2018	Wang et al., 2021
348	NA	Tidal wetland	Saudi Arabia	6	27.31	49.56	Saderne et al., 2018	Wang et al., 2021
349	Abu-Ali Island, Arabian Gulf	Tidal wetland	Saudi Arabia	9	27.2878	49.5695	Cusack et al., 2018	this study
350	NA	Tidal wetland	Saudi Arabia	9.4	27.29	49.57	Saderne et al., 2018	Wang et al., 2021
351	NA	Tidal wetland	Saudi Arabia	12	26.74	50	Saderne et al., 2018	Wang et al., 2021
352	NA	Tidal wetland	Saudi Arabia	11.2	26.66	50.01	Saderne et al., 2018	Wang et al., 2021
353	NA	Tidal wetland	Saudi Arabia	3.1	26.74	50.02	Saderne et al., 2018	Wang et al., 2021
354	China	Tidal wetland	China	223.6	35.86	104.2	Ouyang and Lee, 2014	Henry et al 2024
355	NA	Tidal wetland	China	161.58	38.67	117.56	Li et al., 2003	Wang et al., 2021
356	NA	Tidal wetland	China	27.77	38.83	117.6	Li et al., 2003	Wang et al., 2021
357	NA	Tidal wetland	China	34.08	38.83	117.6	Li et al., 2003	Wang et al., 2021
358	NA	Tidal wetland	China	41.66	38.35	117.75	Li et al., 2003	Wang et al., 2021
359	NA	Tidal wetland	China	53.02	38.35	117.75	Li et al., 2003	Wang et al., 2021
360	NA	Tidal wetland	China	61.85	38.35	117.75	Li et al., 2003	Wang et al., 2021
361	NA	Tidal wetland	China	73.22	38.35	117.75	Li et al., 2003	Wang et al., 2021
362	NA	Tidal wetland	China	244.89	38.35	117.75	Li et al., 2003	Wang et al., 2021
363	NA	Tidal wetland	China	378.7	38.35	117.75	Li et al., 2003	Wang et al., 2021
364	NA	Tidal wetland	China	201.35	37.77	119.16	Wang et al., 2014	Wang et al., 2021
365	NA	Tidal wetland	China	116	33.78	120.48	Bao et al., 2015	Wang et al., 2021
366	NA	Tidal wetland	China	165	33.79	120.49	Bao et al., 2015	Wang et al., 2021
367	NA	Tidal wetland	China	95.24	33.55	120.56	Liu et al., 2010	Wang et al., 2021
368	bare silt	Tidal wetland	China	31.74	33.58	120.56	Gao et al., 2011	Wang et al., 2021
369	P. australis flats	Tidal wetland	China	50.4	33.58	120.56	Gao et al., 2011	Wang et al., 2021
370	S. alterniflora marsh	Tidal wetland	China	65.56	33.58	120.56	Gao et al., 2011	Wang et al., 2021
371	S. alterniflora- S. salsa transition	Tidal wetland	China	180.6	33.58	120.56	Gao et al., 2011	Wang et al., 2021
372	S. salsa marsh	Tidal wetland	China	182.48	33.58	120.56	Gao et al., 2011	Wang et al., 2021
373	S. salsa- P. australis transition	Tidal wetland	China	231.55	33.58	120.56	Gao et al., 2011	Wang et al., 2021
374	NA	Tidal wetland	China	134.93	33.56	120.57	Liu et al., 2010	Wang et al., 2021
375	NA	Tidal wetland	China	151.07	33.57	120.61	Liu et al., 2010	Wang et al., 2021
376	NA	Tidal wetland	China	238.58	33.57	120.62	Liu et al., 2010	Wang et al., 2021
377	NA	Tidal wetland	China	342.87	33.57	120.62	Liu et al., 2010	Wang et al., 2021
378	NA	Tidal wetland	China	391.85	33.57	120.63	Liu et al., 2010	Wang et al., 2021
379	NA	Tidal wetland	China	18.11	32.42	121.36	Li et al., 2011	Wang et al., 2021
380	NA	Tidal wetland	China	22.34	32.42	121.36	Li et al., 2011	Wang et al., 2021
381	Hawkesbury River, New South Wales, Australia	Tidal wetland	Australia	207	-33.6	151.2	Ouyang and Lee, 2014	Henry et al 2024
382	Notth Kooragang Island, New South Wales, Australia	Tidal wetland	Australia	64	-32.9	151.7	Ouyang and Lee, 2014	Henry et al 2024
383	South Kooragang Island, New South Wales, Australia	Tidal wetland	Australia	137	-32.9	151.7	Ouyang and Lee, 2014	Henry et al 2024
384	NA	Tidal wetland	Australia	10.08	-27.3	153.04	Lovelock et al., 2015	Wang et al., 2021
385	NA	Tidal wetland	Australia	54.66	-27.35	153.1	Lovelock et al., 2015	Wang et al., 2021
386	NA	Tidal wetland	Australia	100.33	-30.3	153.12	Sanders own data	Wang et al., 2021
387	NA	Tidal wetland	Australia	92	-30.3	153.13	Sanders own data	Wang et al., 2021
388	NA	Tidal wetland	Australia	147.67	-30.3	153.13	Sanders own data	Wang et al., 2021
389	NA	Tidal wetland	Australia	142.43	-30.14	153.2	Sanders own data	Wang et al., 2021
390	NA	Tidal wetland	Australia	119.95	-29.98	153.21	Sanders own data	Wang et al., 2021
391	NA	Tidal wetland	Australia	29.74	-29.97	153.22	Sanders own data	Wang et al., 2021
392	NA	Tidal wetland	Australia	199	-29.98	153.23	Sanders own data	Wang et al., 2021
393	NA	Tidal wetland	Australia	56.64	-29.88	153.26	Sanders own data	Wang et al., 2021
394	NA	Tidal wetland	Australia	1.23	-27.5	153.26	Lovelock et al., 2015	Wang et al., 2021
395	NA	Tidal wetland	Australia	210.16	-29.86	153.27	Sanders own data	Wang et al., 2021
396	NA	Tidal wetland	Australia	390.72	-27.52	153.41	Lovelock et al., 2015	Wang et al., 2021
397	NA	Tidal wetland	Australia	13.82	-29.11	153.43	Sanders own data	Wang et al., 2021
398	NA	Tidal wetland	Australia	6.53	-27.44	153.44	Lovelock et al., 2015	Wang et al., 2021

## Sheet: mangrove
No	Name	Country	Ecosystem_type	Carbon_gCm2yr	Lat	Lon	Reference	Source
1	Terminos Lagoon-Boca Chica	Mexico	Mangrove	237	18.7	-91.5	Breithaupt et al., 2012	Henry et al., 2024
2	Terminos Lagoon-Boca Chica	Mexico	Mangrove	79	18.7	-91.5	Breithaupt et al., 2012	Henry et al., 2024
3	Terminos Lagoon-Estero Pargo	Mexico	Mangrove	157	18.7	-91.5	Breithaupt et al., 2012	Henry et al., 2024
4	Terminos Lagoon-Estero Pargo	Mexico	Mangrove	75	18.7	-91.5	Breithaupt et al., 2012	Henry et al., 2024
7	Chelem Lagoon, Mexico	Mexico	Mangrove	85.5	21.3	-89.7	Breithaupt et al., 2012	Henry et al., 2024
8	Terminos Lagoon, Mexico	Mexico	Mangrove	53	18.5	-91.8	Breithaupt et al., 2012	Henry et al., 2024
9	Terminos Lagoon, Mexico	Mexico	Mangrove	65	18.5	-91.8	Breithaupt et al., 2012	Henry et al., 2024
10	Ilha Grande, Brazil	Brazil	Mangrove	186	-25.3	-48.3	Sanders et al. 2008	Breithaupt and Steinmuller, 2022
11	Tamandare, Brazil	Brazil	Mangrove	353	-8.7	-35.1	Sanders et al. 2010	Breithaupt and Steinmuller, 2022
12	Tamandare, Brazil	Brazil	Mangrove	949	-8.7	-35.1	Sanders et al. 2010	Breithaupt and Steinmuller, 2022
13	Cananeia, Brazil	Brazil	Mangrove	192	-25.3	-48.3	Rovai et al. 2021	Breithaupt and Steinmuller, 2022
14	Cananeia, Brazil	Brazil	Mangrove	234	-25.3	-48.3	Rovai et al. 2021	Breithaupt and Steinmuller, 2022
15	Guaratuba, Brazil	Brazil	Mangrove	337	-25.8	-48.7	Sanders et al. 2010c	Breithaupt and Steinmuller, 2022
16	Paranagua, Brazil	Brazil	Mangrove	168	-25.3	-48.3	Sanders et al. 2010c	Breithaupt and Steinmuller, 2022
17	Paraty, Brazil	Brazil	Mangrove	169	-23.2	-44.7	Sanders et al. 2010c	Breithaupt and Steinmuller, 2022
18	Florida Keys, USA	United States of America	Mangrove	209.4	25	-80.6	Breithaupt et al., 2012	Breithaupt and Steinmuller, 2022
19	Florida Keys, USA	United States of America	Mangrove	176.6	25	-80.6	Breithaupt et al., 2012	Breithaupt and Steinmuller, 2022
20	Florida Keys, USA	United States of America	Mangrove	67.3	25	-80.6	Breithaupt et al., 2012	Breithaupt and Steinmuller, 2022
21	Florida Keys, USA	United States of America	Mangrove	90.7	25	-80.6	Breithaupt et al., 2012	Breithaupt and Steinmuller, 2022
22	Florida Keys, USA	United States of America	Mangrove	192	25	-80.6	Breithaupt et al., 2012	Breithaupt and Steinmuller, 2022
23	Rookery Bay, FL, USA	United States of America	Mangrove	58.5	26	-81.7	Breithaupt et al., 2012	Breithaupt and Steinmuller, 2022
24	Rookery Bay, FL, USA	United States of America	Mangrove	85.8	26	-81.7	Breithaupt et al., 2012	Breithaupt and Steinmuller, 2022
25	Rookery Bay, FL, USA	United States of America	Mangrove	86	26	-81.7	Lynch et al. 1989	Breithaupt and Steinmuller, 2022
26	Rookery Bay, FL, USA	United States of America	Mangrove	89.1	26	-81.7	Breithaupt et al., 2012	Breithaupt and Steinmuller, 2022
27	Rookery Bay, FL, USA	United States of America	Mangrove	69	26	-81.7	Lynch et al. 1989	Breithaupt and Steinmuller, 2022
29	Shark River, Florida, USA	United States of America	Mangrove	151	25.4	-81.1	Breithaupt et al., 2012	Henry et al., 2024
30	Harney River, Florida, USA	United States of America	Mangrove	168	25.2	-81	Breithaupt et al., 2012	Henry et al., 2024
31	Hinchinbrook Channel, Australia	Australia	Mangrove	67	-18.5	146.3	Breithaupt et al., 2012	Henry et al., 2024
32	Hinchinbrook Channel, Australia	Australia	Mangrove	168	-18.5	146.3	Breithaupt et al., 2012	Henry et al., 2024
33	Hinchinbrook Channel, Australia	Australia	Mangrove	84	-18.5	146.3	Breithaupt et al., 2012	Henry et al., 2024
34	Hinchinbrook Channel, Australia	Australia	Mangrove	336	-18.5	146.3	Breithaupt et al., 2012	Henry et al., 2024
35	Hinchinbrook Channel, Australia	Australia	Mangrove	300	-18.5	146.3	Breithaupt et al., 2012	Henry et al., 2024
36	Hinchinbrook Channel, Australia	Australia	Mangrove	100	-18.5	146.3	Breithaupt et al., 2012	Henry et al., 2024
37	Hinchinbrook Channel, Australia	Australia	Mangrove	26	-18.5	146.3	Breithaupt et al., 2012	Henry et al., 2024
38	Missionary Bay, Australia	Australia	Mangrove	71	-18.5	146.3	Brunskill et al. 2002	Breithaupt and Steinmuller, 2022
39	Missionary Bay, Australia	Australia	Mangrove	97	-18.5	146.3	Brunskill et al. 2002	Breithaupt and Steinmuller, 2022
40	Matang Reserve, Malaysia	Malaysia	Mangrove	410	4.8	100.5	Alongi et al. 2004	Breithaupt and Steinmuller, 2022
41	Matang Reserve, Malaysia	Malaysia	Mangrove	148	4.8	100.5	Alongi et al. 2004	Breithaupt and Steinmuller, 2022
42	Matang Reserve, Malaysia	Malaysia	Mangrove	296	4.8	100.5	Alongi et al. 2004	Breithaupt and Steinmuller, 2022
43	Matang Reserve, Malaysia	Malaysia	Mangrove	296	4.8	100.5	Alongi et al. 2004	Breithaupt and Steinmuller, 2022
44	Matang Reserve, Malaysia	Malaysia	Mangrove	317	4.8	100.5	Alongi et al. 2004	Breithaupt and Steinmuller, 2022
45	Matang Reserve, Malaysia	Malaysia	Mangrove	389	4.8	100.5	Alongi et al. 2004	Breithaupt and Steinmuller, 2022
46	Jiulongjiang Estuary, China	China	Mangrove	149	24.3	117.8	Breithaupt et al., 2012	Henry et al., 2024
47	Jiulongjiang Estuary, China	China	Mangrove	189	24.3	117.8	Breithaupt et al., 2012	Henry et al., 2024
48	Jiulongjiang Estuary, China	China	Mangrove	199	24.3	117.8	Breithaupt et al., 2012	Henry et al., 2024
49	Jiulongjiang Estuary, China	China	Mangrove	216	24.3	117.8	Breithaupt et al., 2012	Henry et al., 2024
50	Jiulongjiang Estuary, China	China	Mangrove	1020	24.3	117.8	Alongi et al. 2005	Breithaupt and Steinmuller, 2022
51	Jiulongjiang Estuary, China	China	Mangrove	667	24.3	117.8	Breithaupt et al., 2012	Henry et al., 2024
52	Fukido, Ishigaki, Japan	Japan	Mangrove	22	24.3	124.2	Breithaupt et al., 2012	Henry et al., 2024
53	Fukido, Ishigaki, Japan	Japan	Mangrove	230	24.3	124.2	Breithaupt et al., 2012	Henry et al., 2024
54	DaLoc, ThanHoa, Vietnam	Vietnam	Mangrove	120	20	106	Breithaupt et al., 2012	Henry et al., 2024
55	DaLoc, ThanHoa, Vietnam	Vietnam	Mangrove	180	20	106	Breithaupt et al., 2012	Henry et al., 2024
56	Trat, Thailand	Thailand	Mangrove	100	12.3	102	Breithaupt et al., 2012	Henry et al., 2024
57	Trat, Thailand	Thailand	Mangrove	600	12.3	102	Breithaupt et al., 2012	Henry et al., 2024
58	Irian Jaya, Indonesia	Indonesia	Mangrove	558	-4.8	136.9	Breithaupt et al., 2012	Henry et al., 2024
59	Irian Jaya, Indonesia	Indonesia	Mangrove	412	-4.8	136.9	Breithaupt et al., 2012	Henry et al., 2024
60	Irian Jaya, Indonesia	Indonesia	Mangrove	637	-4.8	136.9	Breithaupt et al., 2012	Henry et al., 2024
61	Irian Jaya, Indonesia	Indonesia	Mangrove	717	-4.8	136.9	Breithaupt et al., 2012	Henry et al., 2024
66	Terminos Lagoon, Boca Chica, Mexico	Mexico	Mangrove	308	18.7	-91.5	Chmura et al., 2003	Henry et al., 2024
67	Terminos Lagoon, Estero Pargo, Mexico	Mexico	Mangrove	194	18.7	-91.5	Chmura et al., 2003	Henry et al., 2024
68	Terminos Lagoon, Estero Pargo, Mexico	Mexico	Mangrove	146	18.7	-91.5	Chmura et al., 2003	Henry et al., 2024
69	Terminos Lagoon, Boca Chica, Mexico	Mexico	Mangrove	654	18.7	-91.5	Chmura et al., 2003	Henry et al., 2024
72	Rookery Bay, Fla. (Fringe)	United States of America	Mangrove	265	26	-81.7	Chmura et al., 2003	Henry et al., 2024
73	Rookery bay, Fla. (Basin)	United States of America	Mangrove	381	26	-81.7	Chmura et al., 2003	Henry et al., 2024
74	Rookery Bay, Fla. (Exposed Island)	United States of America	Mangrove	338	26	-81.7	Chmura et al., 2003	Henry et al., 2024
75	Rookery Bay, Fla. (Sheltered Island)	United States of America	Mangrove	222	26	-81.8	Chmura et al., 2003	Henry et al., 2024
85	Core 576, Herbert River region, Australia	Australia	Mangrove	26	-18.5	146.3	Chmura et al., 2003	Henry et al., 2024
86	Core 577, Herbert River region, Australia	Australia	Mangrove	168	-18.5	146.3	Chmura et al., 2003	Henry et al., 2024
87	Core 582, Herbert River region, Australia	Australia	Mangrove	84	-18.5	146.3	Chmura et al., 2003	Henry et al., 2024
88	Core 583, Herbert River region, Australia	Australia	Mangrove	336	-18.5	146.3	Chmura et al., 2003	Henry et al., 2024
89	Core 584, Herbert River region, Australia	Australia	Mangrove	300	-18.5	146.3	Chmura et al., 2003	Henry et al., 2024
90	Core 585, Herbert River region, Australia	Australia	Mangrove	100	-18.5	146.3	Chmura et al., 2003	Henry et al., 2024
91	Core 586, Herbert River region, Australia	Australia	Mangrove	71	-18.5	146.3	Chmura et al., 2003	Henry et al., 2024
92	Core 587, Herbert River region, Australia	Australia	Mangrove	97	-18.5	146.3	Chmura et al., 2003	Henry et al., 2024
93	LEBR, Chiapas, Mexico	Mexico	Mangrove	100	15.13	-92.76	Adame et al., 2005	Wang et al., 2021
94	LEBR, Chiapas, Mexico	Mexico	Mangrove	140	15.16	-92.78	Adame et al., 2005	Wang et al., 2021
95	LEBR, Chiapas, Mexico	Mexico	Mangrove	170	15.18	-92.81	Adame et al., 2005	Wang et al., 2021
96	LEBR, Chiapas, Mexico	Mexico	Mangrove	180	15.18	-92.84	Adame et al., 2005	Wang et al., 2021
97	LEBR, Chiapas, Mexico	Mexico	Mangrove	130	15.18	-92.85	Adame et al., 2005	Wang et al., 2021
98	LEBR, Chiapas, Mexico	Mexico	Mangrove	150	15.18	-92.87	Adame et al., 2005	Wang et al., 2021
99	LEBR, Chiapas, Mexico	Mexico	Mangrove	40	15.17	-92.83	Adame et al., 2005	Wang et al., 2021
108	West Bengal, India	India	Mangrove	20.09	21.92	88.12	Banerjee et al., 2012	Wang et al., 2021
109	India	India	Mangrove	58.32	21.78	88.47	Banerjee et al., 2012	Wang et al., 2021
110	India	India	Mangrove	66.3	21.69	88.33	Banerjee et al., 2012	Wang et al., 2021
111	India	India	Mangrove	34.3	22.08	88.77	Banerjee et al., 2012	Wang et al., 2021
123	NA	Honduras	Mangrove	106.91	16.43	-86.23	Cahoon et al., 2003	Wang et al., 2021
124	NA	Honduras	Mangrove	106.91	16.43	-86.23	Cahoon et al., 2003	Wang et al., 2021
125	NA	Honduras	Mangrove	748.4	16.45	-86.14	Cahoon et al., 2003	Wang et al., 2021
126	NA	Honduras	Mangrove	106.91	16.45	-86.14	Cahoon et al., 2003	Wang et al., 2021
127	NA	Honduras	Mangrove	106.91	16.43	-86.23	Cahoon et al., 2003	Wang et al., 2021
128	NA	Honduras	Mangrove	106.91	16.43	-86.23	Cahoon et al., 2003	Wang et al., 2021
134	NA	Australia	Mangrove	89	-32.85	151.7	Howe et al., 2009	Wang et al., 2021
135	Segara Anakan Lagoon, Java	Java	Mangrove	658	-7.67	108.81	Kusumaningtyas et al., 2019	Wang et al., 2021
136	Segara Anakan Lagoon, Java	Java	Mangrove	194	-7.67	109	Kusumaningtyas et al., 2019	Wang et al., 2021
137	Berau Regency, Indonesia	Indonesia	Mangrove	1722	2.33	118.08	Kusumaningtyas et al., 2019	Wang et al., 2021
138	NA	China	Mangrove	65.88	21.75	108.55	Li et al., 2010	Wang et al., 2021
139	NA	China	Mangrove	27	21.87	108.51	Li et al., 2010	Wang et al., 2021
140	NA	China	Mangrove	181.44	21.85	108.6	Li et al., 2010	Wang et al., 2021
141	Moreton Bay, Australia	Australia	Mangrove	122.11	-27.52	153.41	Lovelock et al., 2015	Wang et al., 2021
142	Moreton Bay, Australia	Australia	Mangrove	103.9	-27.42	153.44	Lovelock et al., 2015	Wang et al., 2021
143	Moreton Bay, Australia	Australia	Mangrove	124.36	-27.44	153.44	Lovelock et al., 2015	Wang et al., 2021
144	Moreton Bay, Australia	Australia	Mangrove	94.86	-27.5	153.26	Lovelock et al., 2015	Wang et al., 2021
145	Moreton Bay, Australia	Australia	Mangrove	103.19	-27.35	153.1	Lovelock et al., 2015	Wang et al., 2021
146	Moreton Bay, Australia	Australia	Mangrove	16.07	-27.3	153.04	Lovelock et al., 2015	Wang et al., 2021
147	Mekong Region, Vietnam	Vietnam	Mangrove	227.6	10.53	106.89	MacKenzie et al., 2016	Wang et al., 2021
148	Mekong Region, Vietnam	Vietnam	Mangrove	182.9	10.42	106.88	MacKenzie et al., 2016	Wang et al., 2021
149	Mekong Region, Vietnam	Vietnam	Mangrove	388.6	8.65	105.11	MacKenzie et al., 2016	Wang et al., 2021
150	Mekong Region, Vietnam	Vietnam	Mangrove	274.5	8.65	105.11	MacKenzie et al., 2016	Wang et al., 2021
151	Mekong Region, Vietnam	Vietnam	Mangrove	602.7	8.65	105.11	MacKenzie et al., 2016	Wang et al., 2021
152	Mekong Region, Vietnam	Vietnam	Mangrove	233.7	8.65	105.11	MacKenzie et al., 2016	Wang et al., 2021
153	Mekong Region, Vietnam	Vietnam	Mangrove	121	8.63	105.08	MacKenzie et al., 2016	Wang et al., 2021
154	Mekong Region, Vietnam	Vietnam	Mangrove	206.8	8.63	105.08	MacKenzie et al., 2016	Wang et al., 2021
155	Babeldaob Island, Palau	Palau	Mangrove	322.3	7.63	134.62	MacKenzie et al., 2016	Wang et al., 2021
156	Babeldaob Island, Palau	Palau	Mangrove	369.7	7.63	134.62	MacKenzie et al., 2016	Wang et al., 2021
157	Babeldaob Island, Palau	Palau	Mangrove	280.6	7.58	134.54	MacKenzie et al., 2016	Wang et al., 2021
158	Babeldaob Island, Palau	Palau	Mangrove	153.8	7.58	134.54	MacKenzie et al., 2016	Wang et al., 2021
159	Babeldaob Island, Palau	Palau	Mangrove	69.8	7.39	134.58	MacKenzie et al., 2016	Wang et al., 2021
160	Babeldaob Island, Palau	Palau	Mangrove	157.5	7.39	134.58	MacKenzie et al., 2016	Wang et al., 2021
161	Babeldaob Island, Palau	Palau	Mangrove	141	7.41	134.51	MacKenzie et al., 2016	Wang et al., 2021
162	Babeldaob Island, Palau	Palau	Mangrove	136.4	7.41	134.51	MacKenzie et al., 2016	Wang et al., 2021
163	Babeldaob Island, Palau	Palau	Mangrove	251.9	7.58	134.63	MacKenzie et al., 2016	Wang et al., 2021
164	Babeldaob Island, Palau	Palau	Mangrove	356.7	7.38	134.51	MacKenzie et al., 2016	Wang et al., 2021
165	Babeldaob Island, Palau	Palau	Mangrove	119.5	7.38	134.51	MacKenzie et al., 2016	Wang et al., 2021
166	Naples Bay, FL, USA	United States of America	Mangrove	21	26.08	-81.78	Marchio et al., 2016	Wang et al., 2021
167	Naples Bay, FL, USA	United States of America	Mangrove	47	26.1	-81.78	Marchio et al., 2016	Wang et al., 2021
168	Naples Bay, FL, USA	United States of America	Mangrove	74	26.1	-81.78	Marchio et al., 2016	Wang et al., 2021
169	Naples Bay, FL, USA	United States of America	Mangrove	126	26.1	-81.78	Marchio et al., 2016	Wang et al., 2021
170	Naples Bay, FL, USA	United States of America	Mangrove	50	26.09	-81.77	Marchio et al., 2016	Wang et al., 2021
171	Naples Bay, FL, USA	United States of America	Mangrove	127	26.09	-81.78	Marchio et al., 2016	Wang et al., 2021
172	Naples Bay, FL, USA	United States of America	Mangrove	162	26.09	-81.78	Marchio et al., 2016	Wang et al., 2021
173	NA	China	Mangrove	107.4	21.87	108.57	Meng et al., 2016	Wang et al., 2021
174	NA	China	Mangrove	22.8	21.81	108.5	Meng et al., 2016	Wang et al., 2021
175	Moreton Bay, Australia	Australia	Mangrove	54.43	-27.16	153.03	Morelli et al., 2012	Wang et al., 2021
176	Moreton Bay, Australia	Australia	Mangrove	46.27	-27.2	153.05	Morelli et al., 2012	Wang et al., 2021
177	Moreton Bay, Australia	Australia	Mangrove	119.75	-27.28	153.01	Morelli et al., 2012	Wang et al., 2021
178	NA	Australia	Mangrove	216.36	-27.62	153.33	Morelli et al., 2012	Wang et al., 2021
179	Moanaanuanu Estuary, New Zealand	New Zealand	Mangrove	43.8	-37.2	175.86	Perez et al., 2017	Wang et al., 2021
180	Moanaanuanu Estuary, New Zealand	New Zealand	Mangrove	47.5	-37.2	175.86	Perez et al., 2017	Wang et al., 2021
181	Moanaanuanu Estuary, New Zealand	New Zealand	Mangrove	79.5	-37.2	175.86	Perez et al., 2017	Wang et al., 2021
182	Persian Gulf	Saudi Arabia	Mangrove	8.7	27.29	49.57	Saderne et al., 2018	Wang et al., 2021
183	Persian Gulf	Saudi Arabia	Mangrove	6.2	27.28	49.56	Saderne et al., 2018	Wang et al., 2021
184	Persian Gulf	Saudi Arabia	Mangrove	23	27.28	49.57	Saderne et al., 2018	Wang et al., 2021
190	NA	Brazil	Mangrove	1023	-23.88	-46.36	Sanders et al., 2014	Wang et al., 2021
191	Moreton Bay, Australia	Australia	Mangrove	150	-27.78	153.39	Sanders et al., 2016	Wang et al., 2021
193	NA	Australia	Mangrove	144.74	-30.3	153.13	Sanders own data	Wang et al., 2021
194	NA	Australia	Mangrove	35.34	-30.3	153.12	Sanders own data	Wang et al., 2021
195	NA	Australia	Mangrove	70	-30.3	153.13	Sanders own data	Wang et al., 2021
196	NA	Australia	Mangrove	46.82	-30.3	153.13	Sanders own data	Wang et al., 2021
197	NA	Australia	Mangrove	23.87	-30.3	153.12	Sanders own data	Wang et al., 2021
198	NA	Australia	Mangrove	87.72	-30.3	153.13	Sanders own data	Wang et al., 2021
211	NA	Australia	Mangrove	191.41	-29.98	153.23	Sanders own data	Wang et al., 2021
212	NA	Australia	Mangrove	68.04	-29.98	153.22	Sanders own data	Wang et al., 2021
213	NA	Australia	Mangrove	73.92	-29.11	153.43	Sanders own data	Wang et al., 2021
214	NA	India	Mangrove	92.37	11.44	79.8	Sanders own data	Wang et al., 2021
215	NA	India	Mangrove	226.94	9.92	76.33	Sanders own data	Wang et al., 2021
216	NA	India	Mangrove	794.81	9.92	76.32	Sanders own data	Wang et al., 2021
217	NA	Brazil	Mangrove	253.57	-0.87	-46.65	Sanders own data	Wang et al., 2021
218	NA	Brazil	Mangrove	276.16	-22.72	-43.03	Sanders own data	Wang et al., 2021
219	NA	Brazil	Mangrove	292.63	-22.73	-43.02	Sanders own data	Wang et al., 2021
220	NA	Brazil	Mangrove	379.08	-20.24	-40.31	Sanders own data	Wang et al., 2021
221	NA	Brazil	Mangrove	43	-20.8	-40.66	Sanders own data	Wang et al., 2021
222	NA	Brazil	Mangrove	281.95	-19.94	-40.17	Sanders own data	Wang et al., 2021
223	NA	Peru	Mangrove	170.13	-3.44	-80.29	Sanders own data	Wang et al., 2021
224	NA	Peru	Mangrove	461.97	-3.44	-80.27	Sanders own data	Wang et al., 2021
225	NA	Australia	Mangrove	76.94	-29.85	153.26	Sanders own data	Wang et al., 2021
226	NA	Australia	Mangrove	126	-29.85	153.26	Sanders own data	Wang et al., 2021
227	NA	Brazil	Mangrove	584.82	-23.02	-43.61	Sanders own data	Wang et al., 2021
228	NA	Mozambique	Mangrove	79.87	-18.76	36.34	Sanders own data	Wang et al., 2021
229	NA	Australia	Mangrove	180.54	-30.14	153.2	Sanders own data	Wang et al., 2021
230	NA	Australia	Mangrove	213.86	-30.14	153.2	Sanders own data	Wang et al., 2021
231	NA	Australia	Mangrove	29.07	-28.88	153.59	Sanders own data	Wang et al., 2021
232	Bintuni Bay, West Papua Province, Indonesia	Indonesia	Mangrove	50	-2.51	133.48	Sasmito et al., 2020	Wang et al., 2021
233	Bintuni Bay, West Papua Province, Indonesia	Indonesia	Mangrove	90	-2.58	133.51	Sasmito et al., 2020	Wang et al., 2021
234	NA	China	Mangrove	236.75	21.85	108.58	Xia et al., 2015	Wang et al., 2021
235	NA	China	Mangrove	118.37	21.87	108.57	Xia et al., 2015	Wang et al., 2021
236	NA	China	Mangrove	118.37	21.86	108.6	Xia et al., 2015	Wang et al., 2021
237	NA	China	Mangrove	43.25	21.57	109.67	Xia et al., 2015	Wang et al., 2021
238	NA	China	Mangrove	75.12	21.49	109.76	Xia et al., 2015	Wang et al., 2021
239	NA	China	Mangrove	70.57	21.5	109.76	Xia et al., 2015	Wang et al., 2021
240	NA	China	Mangrove	59.19	21.5	109.76	Xia et al., 2015	Wang et al., 2021
241	NA	China	Mangrove	50.08	21.49	109.76	Xia et al., 2015	Wang et al., 2021
242	NA	China	Mangrove	86.5	21.81	108.5	Xia et al., 2016	Wang et al., 2021
243	NA	China	Mangrove	186.67	21.81	108.5	Xia et al., 2016	Wang et al., 2021
244	Leizhou Peninsula, China	China	Mangrove	292.23	20.99	110.16	Yang et al., 2014	Wang et al., 2021
245	Leizhou Peninsula, China	China	Mangrove	436.42	21.57	109.76	Yang et al., 2014	Wang et al., 2021
246	Leizhou Peninsula, China	China	Mangrove	243.97	20.88	110.18	Yang et al., 2014	Wang et al., 2021
247	Leizhou Peninsula, China	China	Mangrove	405.29	21.16	110.42	Yang et al., 2014	Wang et al., 2021
248	NA	China	Mangrove	86.05	19.99	110.57	Zhang et al., 1996	Wang et al., 2021
249	NA	China	Mangrove	76.85	21.55	109.77	Zhang et al., 1996	Wang et al., 2021
250	NA	China	Mangrove	190.88	21.55	109.77	Zhang et al., 1996	Wang et al., 2021
251	NA	China	Mangrove	34.71	21.55	109.77	Zhang et al., 1996	Wang et al., 2021
252	NA	China	Mangrove	76.85	21.55	109.77	Zhang et al., 1996	Wang et al., 2021
253	NA	China	Mangrove	44.62	21.55	109.77	Zhang et al., 1996	Wang et al., 2021
254	NA	China	Mangrove	80.47	21.57	109.75	Zhu et al., 2016	Wang et al., 2021
255	NA	China	Mangrove	105.42	21.56	109.75	Zhu et al., 2016	Wang et al., 2021
256	NA	China	Mangrove	34.58	21.56	109.75	Zhu et al., 2016	Wang et al., 2021
257	NA	China	Mangrove	83.97	21.53	109.78	Zhu et al., 2016	Wang et al., 2021
258	NA	China	Mangrove	150.56	21.53	109.78	Zhu et al., 2016	Wang et al., 2021
259	NA	China	Mangrove	69.09	21.52	109.78	Zhu et al., 2016	Wang et al., 2021
260	Gebel Elba Protected Area, Egypt, mixed stands	Egypt	Mangrove	10.34	22.66	35.59	Afefe et al., 2020	Breithaupt and Steinmuller, 2022
261	Gebel Elba Protected Area, Egypt, R. mucronata	Egypt	Mangrove	10.76	22.66	35.59	Afefe et al., 2020	Breithaupt and Steinmuller, 2022
262	Gebel Elba Protected Area, Egypt, A. marina	Egypt	Mangrove	13.81	22.66	35.59	Afefe et al., 2020	Breithaupt and Steinmuller, 2022
263	Thuwal Island,Saudi Arabia	Saudi Arabia	Mangrove	10	39.085	22.2818	Almhasheer et al., 2017	Breithaupt and Steinmuller, 2022
264	Economic city, Saudi Arabia	Saudi Arabia	Mangrove	16	39.1303	22.392	Almhasheer et al., 2017	Breithaupt and Steinmuller, 2022
265	Khor Alkharar,Saudi Arabia	Saudi Arabia	Mangrove	23	22.9719	38.8465	Almhasheer et al., 2017	Breithaupt and Steinmuller, 2022
266	Petro Rabigh, Saudi Arabia	Saudi Arabia	Mangrove	9	39.0125	22.7529	Almhasheer et al., 2017	Breithaupt and Steinmuller, 2022
267	Tsimipaika Bay, Madagascar	Madagascar	Mangrove	18	-13.3	48.2	Arias-Ortiz et al., 2021	Breithaupt and Steinmuller, 2022
268	Tsimipaika Bay, Madagascar	Madagascar	Mangrove	25	-13.3	48.2	Arias-Ortiz et al., 2021	Breithaupt and Steinmuller, 2022
269	Tsimipaika Bay, Madagascar	Madagascar	Mangrove	64	-13.3	48.2	Arias-Ortiz et al., 2021	Breithaupt and Steinmuller, 2022
270	Tsimipaika Bay, Madagascar	Madagascar	Mangrove	75	-13.3	48.2	Arias-Ortiz et al., 2021	Breithaupt and Steinmuller, 2022
271	Tsimipaika Bay, Madagascar	Madagascar	Mangrove	176	-13.3	48.2	Arias-Ortiz et al., 2021	Breithaupt and Steinmuller, 2022
272	Benevente, Brazil	Brazil	Mangrove	43	-19	-40	Bernadino et al., 2020	Breithaupt and Steinmuller, 2022
273	Piraque-Acu, Brazil	Brazil	Mangrove	282	-19.9	-40	Bernadino et al., 2020	Breithaupt and Steinmuller, 2022
274	Vitoria Bay, Brazil	Brazil	Mangrove	388	-20	-40	Bernadino et al., 2020	Breithaupt and Steinmuller, 2022
275	Port Aransas, TX, USA	United States of America	Mangrove	253	27.8	-97	Bianchi et al., 2013	Breithaupt and Steinmuller, 2022
276	Port Aransas, TX, USA	United States of America	Mangrove	270	27.8	-97	Bianchi et al., 2013	Breithaupt and Steinmuller, 2022
277	Broad River, FL, USA	United States of America	Mangrove	127	25.3	-81	Breithaupt et al., 2019	Breithaupt and Steinmuller, 2022
278	Broad River, FL, USA	United States of America	Mangrove	133.8	25.3	-81	Breithaupt et al., 2019	Breithaupt and Steinmuller, 2022
279	Broad River, FL, USA	United States of America	Mangrove	153	25.3	-81	Breithaupt et al., 2019	Breithaupt and Steinmuller, 2022
280	Broad River, FL, USA	United States of America	Mangrove	204	25.3	-81	Breithaupt et al., 2019	Breithaupt and Steinmuller, 2022
281	Everglades National Park, FL, USA	United States of America	Mangrove	68.5	25	-80	Breithaupt et al., 2020	Breithaupt and Steinmuller, 2022
282	Everglades National Park, FL, USA	United States of America	Mangrove	136.5	25	-80	Breithaupt et al., 2020	Breithaupt and Steinmuller, 2022
283	Celestun Lagoon, Mexico	Mexico	Mangrove	11	20.8	-90.2	Carnero-Bravo et al., 2018	Breithaupt and Steinmuller, 2022
284	Celestun Lagoon, Mexico	Mexico	Mangrove	47	20.8	-90.2	Carnero-Bravo et al., 2018	Breithaupt and Steinmuller, 2022
285	Marismas Nacionales System, Mexico, MNS3	Mexico	Mangrove	27.3	21.8	-105.5	Cuellar-Martinez et al., 2020	Breithaupt and Steinmuller, 2022
286	Marismas Nacionales System, Mexico, MNS10	Mexico	Mangrove	47.6	21.8	-105.5	Cuellar-Martinez et al., 2020	Breithaupt and Steinmuller, 2022
287	Marismas Nacionales System, Mexico, MNS6	Mexico	Mangrove	52.1	21.8	-105.5	Cuellar-Martinez et al., 2020	Breithaupt and Steinmuller, 2022
288	Marismas Nacionales System, Mexico, MNS11	Mexico	Mangrove	59.5	21.8	-105.5	Cuellar-Martinez et al., 2020	Breithaupt and Steinmuller, 2022
289	Cancun-Riviera Maya, Mexico, UH1	Mexico	Mangrove	62	20.84	-86.91	Cuellar-Martinez et al., 2020	Breithaupt and Steinmuller, 2022
290	Marismas Nacionales System, Mexico, MNS9	Mexico	Mangrove	62.2	21.8	-105.5	Cuellar-Martinez et al., 2020	Breithaupt and Steinmuller, 2022
291	Marismas Nacionales System, Mexico, MNS1	Mexico	Mangrove	63.9	21.8	-105.5	Cuellar-Martinez et al., 2020	Breithaupt and Steinmuller, 2022
292	Marismas Nacionales System, Mexico, MNS2	Mexico	Mangrove	65.8	21.8	-105.5	Cuellar-Martinez et al., 2020	Breithaupt and Steinmuller, 2022
293	Marismas Nacionales System, Mexico, MNS7	Mexico	Mangrove	71.4	21.8	-105.5	Cuellar-Martinez et al., 2020	Breithaupt and Steinmuller, 2022
294	Estero de Ur��as Lagoon, Mexico, EU7	Mexico	Mangrove	75.7	23.2	-106.3	Cuellar-Martinez et al., 2020	Breithaupt and Steinmuller, 2022
295	Estero de Ur��as Lagoon, Mexico, EU5	Mexico	Mangrove	85.7	23.2	-106.3	Cuellar-Martinez et al., 2020	Breithaupt and Steinmuller, 2022
296	Marismas Nacionales System, Mexico, MNS12	Mexico	Mangrove	96.3	21.8	-105.5	Cuellar-Martinez et al., 2020	Breithaupt and Steinmuller, 2022
297	Cancun-Riviera Maya, Mexico, JB1	Mexico	Mangrove	106.9	20.87	-86.88	Cuellar-Martinez et al., 2020	Breithaupt and Steinmuller, 2022
298	Estero de Ur��as Lagoon, Mexico, EU6	Mexico	Mangrove	116	23.2	-106.3	Cuellar-Martinez et al., 2020	Breithaupt and Steinmuller, 2022
299	Estero de Ur��as Lagoon, Mexico, EU8	Mexico	Mangrove	167.4	23.2	-106.3	Cuellar-Martinez et al., 2020	Breithaupt and Steinmuller, 2022
300	Cancun-Riviera Maya, Mexico, PCm1	Mexico	Mangrove	228.1	20.9	86.8	Cuellar-Martinez et al., 2020	Breithaupt and Steinmuller, 2022
301	Marismas Nacionales System, Mexico, MNS13	Mexico	Mangrove	14.7	21.8	-105.5	Cuellar-Martinez et al., 2021	Breithaupt and Steinmuller, 2022
302	Marismas Nacionales System, Mexico, MNS15	Mexico	Mangrove	22	21.8	-105.5	Cuellar-Martinez et al., 2022	Breithaupt and Steinmuller, 2022
303	Abu-Ali Island, Saudi Arabia	Saudi Arabia	Mangrove	6.2	27.3	49.6	Cusack et al., 2018	Breithaupt and Steinmuller, 2022
304	Ras Tanura/Safwa, Saudi Arabia	Saudi Arabia	Mangrove	12	26.7	50	Cusack et al., 2018	Breithaupt and Steinmuller, 2022
305	Red Sea Coast, Egypt	Egypt	Mangrove	6.1	27	33	Eid and Shaltout et al., 2016	Breithaupt and Steinmuller, 2022
306	Farasan Islands, Saudi Arabia - R. mucronata	Saudi Arabia	Mangrove	4.8	16.75	42	Eid et al., 2020	Breithaupt and Steinmuller, 2022
307	Farasan Islands, Saudi Arabia - A. marina	Saudi Arabia	Mangrove	5.4	16.75	42	Eid et al., 2020	Breithaupt and Steinmuller, 2022
308	Pichavaram, India	India	Mangrove	2.33	11	79	Gnanamoorthy et al., 2019	Breithaupt and Steinmuller, 2022
309	Pichavaram, India	India	Mangrove	4.44	11	79	Gnanamoorthy et al., 2019	Breithaupt and Steinmuller, 2022
310	Jaring Halus, North Sumatra, Indonesia	North Sumatra, Indonesia	Mangrove	72.98	3.4	98.3	Hanggara et al., 2021	Breithaupt and Steinmuller, 2022
311	Jaring Halus, North Sumatra, Indonesia	North Sumatra, Indonesia	Mangrove	107.12	3.4	98.3	Hanggara et al., 2021	Breithaupt and Steinmuller, 2022
312	Jaring Halus, North Sumatra, Indonesia	North Sumatra, Indonesia	Mangrove	274.31	3.4	98.3	Hanggara et al., 2021	Breithaupt and Steinmuller, 2022
313	Jaguaripe Estuary, Brazil	Brazil	Mangrove	131	-12.5	-38	Hatje et al., 2021	Breithaupt and Steinmuller, 2022
314	Jaguaripe Estuary, Brazil	Brazil	Mangrove	140	-12.5	-38	Hatje et al., 2021	Breithaupt and Steinmuller, 2022
315	Jaguaripe Estuary, Brazil	Brazil	Mangrove	298	-12.5	-38	Hatje et al., 2021	Breithaupt and Steinmuller, 2022
316	Jaguaripe Estuary, Brazil	Brazil	Mangrove	331	-12.5	-38	Hatje et al., 2021	Breithaupt and Steinmuller, 2022
317	Jaguaripe Estuary, Brazil	Brazil	Mangrove	404	-12.5	-38	Hatje et al., 2021	Breithaupt and Steinmuller, 2022
318	Jaguaripe Estuary, Brazil	Brazil	Mangrove	904	-12.5	-38	Hatje et al., 2021	Breithaupt and Steinmuller, 2022
319	Spencer, New South Wales, Australia	Australia	Mangrove	220	-33.47	151.14	Lamont et al., 2020	Breithaupt and Steinmuller, 2022
320	Spencer, New South Wales, Australia	Australia	Mangrove	430	-33.47	151.14	Lamont et al., 2020	Breithaupt and Steinmuller, 2022
321	Nanliu River Estuary, China	China	Mangrove	400	22	108	Liu et al., 2020	Breithaupt and Steinmuller, 2022
322	Nanliu River Estuary, China	China	Mangrove	500	22	108	Liu et al., 2020	Breithaupt and Steinmuller, 2022
323	Futian National Nature Reserve, Hong Kong	China	Mangrove	155	22.5	114	Lunstrum and Chen et al., 2014	Breithaupt and Steinmuller, 2022
324	French Guiana	French Guiana	Mangrove	72	5	-53	Marchand et al., 2017	Breithaupt and Steinmuller, 2022
325	French Guiana	French Guiana	Mangrove	135	5	-53	Marchand et al., 2017	Breithaupt and Steinmuller, 2022
326	French Guiana	French Guiana	Mangrove	254	5	-53	Marchand et al., 2017	Breithaupt and Steinmuller, 2022
327	French Guiana	French Guiana	Mangrove	480	5	-53	Marchand et al., 2017	Breithaupt and Steinmuller, 2022
328	French Guiana	French Guiana	Mangrove	486	5	-53	Marchand et al., 2017	Breithaupt and Steinmuller, 2022
329	Marapanim River, Brazil	Brazil	Mangrove	143.2	0.4	-47.2	Matos et al., 2021	Breithaupt and Steinmuller, 2022
330	Marapanim River, Brazil	Brazil	Mangrove	192.5	0.4	-47.2	Matos et al., 2021	Breithaupt and Steinmuller, 2022
331	Marapanim River, Brazil	Brazil	Mangrove	215.8	0.4	-47.2	Matos et al., 2021	Breithaupt and Steinmuller, 2022
332	Marapanim River, Brazil	Brazil	Mangrove	218.7	0.4	-47.2	Matos et al., 2021	Breithaupt and Steinmuller, 2022
333	North Sumatra, Indonesia	Indonesia	Mangrove	47.7	-2.53333	98.4	Murdiyarso et al., 2018	Breithaupt and Steinmuller, 2022
334	North Sumatra, Indonesia	Indonesia	Mangrove	50.1	-2.53333	98.4	Murdiyarso et al., 2018	Breithaupt and Steinmuller, 2022
335	Guanabara Bay, Brazil	Brazil	Mangrove	61.7	-22	-43	Perez et al., 2018	Breithaupt and Steinmuller, 2022
336	Tumbes, Peru	Peru	Mangrove	192	-3.4	-80.16	Perez et al., 2020	Breithaupt and Steinmuller, 2022
337	Tumbes, Peru	Peru	Mangrove	700	-3.4	-80.16	Perez et al., 2020	Breithaupt and Steinmuller, 2022
338	Cochin Estuary, India	India	Mangrove	18	9.52	76.2	Rani et al., 2021	Breithaupt and Steinmuller, 2022
339	Cochin Estuary, India	India	Mangrove	22	9.52	76.2	Rani et al., 2021	Breithaupt and Steinmuller, 2022
340	Cochin Estuary, India	India	Mangrove	95	9.52	76.2	Rani et al., 2021	Breithaupt and Steinmuller, 2022
341	Silonay Mangrove Conservation Ecopark, Luzon, Phillipines	Phillipines	Mangrove	1020	13.4	121.2	Salmo et al., 2019	Breithaupt and Steinmuller, 2022
342	Evans Head, Australia	Australia	Mangrove	63	-29	153	Santos et al., 2019	Breithaupt and Steinmuller, 2022
343	Middle Red Sea Coast, Saudi Arabia	Saudi Arabia	Mangrove	5	39.17	21.4	Shaltout et al., 2020	Breithaupt and Steinmuller, 2022
344	North Red Sea Coast, Saudi Arabia	Saudi Arabia	Mangrove	5.9	35.71	27.33	Shaltout et al., 2020	Breithaupt and Steinmuller, 2022
345	South Red Sea Coast, Saudi Arabia	Saudi Arabia	Mangrove	6	41.53	18.2	Shaltout et al., 2020	Breithaupt and Steinmuller, 2022
346	Moloka'i, HI, USA	United States of America	Mangrove	240	21	-157	Soper et al., 2019	Breithaupt and Steinmuller, 2022
347	Moloka'i, HI, USA	United States of America	Mangrove	370	21	-157	Soper et al., 2019	Breithaupt and Steinmuller, 2022
348	Moloka'i, HI, USA	United States of America	Mangrove	740	21	-157	Soper et al., 2019	Breithaupt and Steinmuller, 2022
349	St. Augustine, FL, USA	United States of America	Mangrove	17	29	81	Vaughn et al., 2020	Breithaupt and Steinmuller, 2022
350	Waccassassa Bay, FL, USA	United States of America	Mangrove	22	29.1	-82.8	Vaughn et al., 2020	Breithaupt and Steinmuller, 2022
351	San Juan Bay Estuary, Puerto Rico	Puerto Rico	Mangrove	188	18	-66	Wigand et al., 2021	Breithaupt and Steinmuller, 2022
352	Yingluo Bay, China	China	Mangrove	65.6	21.48	109.78	Zhang et al., 2021	Breithaupt and Steinmuller, 2022
353	Yingluo Bay, China	China	Mangrove	76.8	21.48	109.78	Zhang et al., 2021	Breithaupt and Steinmuller, 2022
354	Yingluo Bay, China	China	Mangrove	91.7	21.48	109.78	Zhang et al., 2021	Breithaupt and Steinmuller, 2022
355	Benoa Bay, Bali	Bali	Mangrove	250	-8.78272	115.221	Dharmayasa et al., 2024	this study
356	Hainan	China	Mangrove	141.52	20.002	110.541	Jiang et al., 2024	this study
357	T��erminos Lagoon	Mexico	Mangrove	103	18.3389	-91.7959	Jupin et al., 2024	this study
358	El Verde Camacho Lagoon	Mexico	Mangrove	138	23.7064	-106.93	Jupin et al., 2024	this study
359	Karumba, Australia	Australia	Mangrove	72.6	-17.4652	140.816	Sippo et al., 2020	this study
360	Sadgroves Creek, Darwin Harbour	Australia	Mangrove	215.79	-12.441	130.86	Cotovicz et al., 2024	this study
361	Hinchinbrook Island	Australia	Mangrove	168.28	-18.244	146.228	Cotovicz et al., 2024	this study
362	Tom's creek, Seventeen Seventy	Australia	Mangrove	56.79	-24.19	151.876	Cotovicz et al., 2024	this study
363	Jacobs Well, Moreton Bay	Australia	Mangrove	79.9	-27.783	153.375	Cotovicz et al., 2024	this study
364	Dunns creek, Newcastle	Australia	Mangrove	50.4	-32.85	151.767	Cotovicz et al., 2024	this study
365	Barwon Heads, Melbourne	Australia	Mangrove	40.95	-38.262	144.496	Cotovicz et al., 2024	this study
366	Mai Po, Hong Kong	China	Mangrove	59	22.4978	114.031	Allais et al., 2024	this study
367	Tung Chung , Hong Kong	China	Mangrove	100	22.2811	113.928	Allais et al., 2024	this study
368	Ting Kok, Hong Kong	China	Mangrove	48	22.4734	114.214	Allais et al., 2024	this study
369	To Kwa Peng, Hong Kong	China	Mangrove	74	22.4287	114.333	Allais et al., 2024	this study
370	Melbourne, Australia	Australia	Mangrove	150	-37.8251	144.897	Carnell et al. 2022	Alongi and Zimmer, 2024
371	Melbourne, Australia	Australia	Mangrove	240	-37.8251	144.897	Carnell et al. 2022	Alongi and Zimmer, 2024
372	Melbourne, Australia	Australia	Mangrove	270	-37.8251	144.897	Carnell et al. 2022	Alongi and Zimmer, 2024
373	Bali, Indonesia	Indonesia	Mangrove	150	-8.3944	114.627	Sidik et al. 2019	Alongi and Zimmer, 2024
374	West Papua, Indonesia	Indonesia	Mangrove	21	2.05	133.5	Sasmito et al. 2020	Alongi and Zimmer, 2024
375	West Papua, Indonesia	Indonesia	Mangrove	119	2.05	133.5	Sasmito et al. 2020	Alongi and Zimmer, 2024
376	Malacca, Malaysia	Malaysia	Mangrove	92	2.1	102.45	Azman et al. 2023	Alongi and Zimmer, 2024
377	Malacca, Malaysia	Malaysia	Mangrove	117	2.1	102.45	Azman et al. 2023	Alongi and Zimmer, 2024
378	Malacca, Malaysia	Malaysia	Mangrove	250	2.1	102.45	Azman et al. 2023	Alongi and Zimmer, 2024
379	Malacca, Malaysia	Malaysia	Mangrove	320	2.1	102.45	Azman et al. 2023	Alongi and Zimmer, 2024
380	Malacca, Malaysia	Malaysia	Mangrove	600	2.1	102.45	Azman et al. 2023	Alongi and Zimmer, 2024
381	West Papua, Indonesia	Indonesia	Mangrove	113	-2.53333	133	Murdiyarso et al. 2021	Alongi and Zimmer, 2024
382	West Papua, Indonesia	Indonesia	Mangrove	267	-2.53333	133	Murdiyarso et al. 2021	Alongi and Zimmer, 2024
383	West Papua, Indonesia	Indonesia	Mangrove	339	-2.53333	133	Murdiyarso et al. 2021	Alongi and Zimmer, 2024
384	West Papua, Indonesia	Indonesia	Mangrove	365	-2.53333	133	Murdiyarso et al. 2021	Alongi and Zimmer, 2024
385	N.Sumatra, Indonesia	Indonesia	Mangrove	181	3.71667	98.7833	Suprayogi et al. 2022	Alongi and Zimmer, 2024
386	French Guiana coast	French Guiana	Mangrove	300	5	-52.6	Walcker et al. 2018	Alongi and Zimmer, 2024
387	SE Thailand	Thailand	Mangrove	200	8.51667	100.037	Sakai et al. 2023	Alongi and Zimmer, 2024
388	SE Thailand	Thailand	Mangrove	270	8.51667	100.037	Sakai et al. 2023	Alongi and Zimmer, 2024
389	SE Thailand	Thailand	Mangrove	310	8.51667	100.037	Sakai et al. 2023	Alongi and Zimmer, 2024
390	SE Thailand	Thailand	Mangrove	400	8.51667	100.037	Sakai et al. 2023	Alongi and Zimmer, 2024
391	SE Thailand	Thailand	Mangrove	410	8.51667	100.037	Sakai et al. 2023	Alongi and Zimmer, 2024
392	Can Gio, Vietnam	Vietnam	Mangrove	60	10.0833	107	Van Vinh et al. 2022	Alongi and Zimmer, 2024
393	Sawi Bay, Thailand	Thailand	Mangrove	15.3	10.3833	99.1667	Alongi et al. 2001	Alongi and Zimmer, 2024
394	Sawi Bay, Thailand	Thailand	Mangrove	16.9	10.3833	99.1667	Alongi et al. 2001	Alongi and Zimmer, 2024
395	Sawi Bay, Thailand	Thailand	Mangrove	18.8	10.3833	99.1667	Alongi et al. 2001	Alongi and Zimmer, 2024
396	Sawi Bay, Thailand	Thailand	Mangrove	23.4	10.3833	99.1667	Alongi et al. 2001	Alongi and Zimmer, 2024
397	Samar, Philippines	Philippines	Mangrove	142	11	122.383	Salmo & Gianan. 2019	Alongi and Zimmer, 2024
398	Samar, Philippines	Philippines	Mangrove	149	11	122.383	Salmo & Gianan. 2019	Alongi and Zimmer, 2024
399	Pichavaram, India	India	Mangrove	233	11.3333	79.9167	Gnanamoorthy et al. 2019	Alongi and Zimmer, 2024
400	Pichavaram, India	India	Mangrove	302	11.3333	79.9167	Gnanamoorthy et al. 2019	Alongi and Zimmer, 2024
401	Pichavaram, India	India	Mangrove	317	11.3333	79.9167	Gnanamoorthy et al. 2019	Alongi and Zimmer, 2024
402	Pichavaram, India	India	Mangrove	327	11.3333	79.9167	Gnanamoorthy et al. 2019	Alongi and Zimmer, 2024
403	Pichavaram, India	India	Mangrove	370	11.3333	79.9167	Gnanamoorthy et al. 2019	Alongi and Zimmer, 2024
404	Pichavaram, India	India	Mangrove	182	11.4181	79.7833	Sahu & Kathiresan. 2019	Alongi and Zimmer, 2024
405	Pichavaram, India	India	Mangrove	198	11.4181	79.7833	Sahu & Kathiresan. 2019	Alongi and Zimmer, 2024
406	Pichavaram, India	India	Mangrove	206	11.4181	79.7833	Sahu & Kathiresan. 2019	Alongi and Zimmer, 2024
407	Pichavaram, India	India	Mangrove	228	11.4181	79.7833	Sahu & Kathiresan. 2019	Alongi and Zimmer, 2024
408	Pichavaram, India	India	Mangrove	239	11.4181	79.7833	Sahu & Kathiresan. 2019	Alongi and Zimmer, 2024
409	Vellar-Coleroon, India	India	Mangrove	0.7	11.4886	79.765	Kathiresan et al. 2021	Alongi and Zimmer, 2024
410	Vellar-Coleroon, India	India	Mangrove	0.7	11.4886	79.765	Kathiresan et al. 2021	Alongi and Zimmer, 2024
411	Vellar-Coleroon, India	India	Mangrove	0.8	11.4886	79.765	Kathiresan et al. 2021	Alongi and Zimmer, 2024
412	Vellar-Coleroon, India	India	Mangrove	0.9	11.4886	79.765	Kathiresan et al. 2021	Alongi and Zimmer, 2024
413	Vellar-Coleroon, India	India	Mangrove	1.1	11.4886	79.765	Kathiresan et al. 2021	Alongi and Zimmer, 2024
414	Vellar-Coleroon, India	India	Mangrove	1.1	11.4886	79.765	Kathiresan et al. 2021	Alongi and Zimmer, 2024
415	Vellar-Coleroon, India	India	Mangrove	1.1	11.4886	79.765	Kathiresan et al. 2021	Alongi and Zimmer, 2024
416	Vellar-Coleroon, India	India	Mangrove	1.1	11.4886	79.765	Kathiresan et al. 2021	Alongi and Zimmer, 2024
417	Vellar-Coleroon, India	India	Mangrove	1.1	11.4886	79.765	Kathiresan et al. 2021	Alongi and Zimmer, 2024
418	Vellar-Coleroon, India	India	Mangrove	8	11.4886	79.765	Kathiresan et al. 2021	Alongi and Zimmer, 2024
419	Vellar-Coleroon, India	India	Mangrove	9	11.4886	79.765	Kathiresan et al. 2021	Alongi and Zimmer, 2024
420	Vellar-Coleroon, India	India	Mangrove	9	11.4886	79.765	Kathiresan et al. 2021	Alongi and Zimmer, 2024
421	Vellar-Coleroon, India	India	Mangrove	1.1	11.4886	79.765	Kathiresan et al. 2021	Alongi and Zimmer, 2024
422	Panay Is, Philippines	Philippines	Mangrove	60	11.7167	122.383	Ray et al. 2023	Alongi and Zimmer, 2024
423	Panay Is, Philippines	Philippines	Mangrove	130	11.7167	122.383	Ray et al. 2023	Alongi and Zimmer, 2024
424	Panay Is, Philippines	Philippines	Mangrove	330	11.7167	122.383	Ray et al. 2023	Alongi and Zimmer, 2024
425	Central Philippines	Philippines	Mangrove	150	13.05	122.35	Castillo and Breva 2012	Alongi and Zimmer, 2024
426	E Central Philippines	Philippines	Mangrove	650	13.05	122.35	Castillo and Breva 2012	Alongi and Zimmer, 2024
427	Wcentral Philippines	Philippines	Mangrove	520	13.05	122.35	Castillo and Breva 2012	Alongi and Zimmer, 2024
428	NW Philippines	Philippines	Mangrove	300	13.0667	122.35	Castillo and Breva 2012	Alongi and Zimmer, 2024
429	Quezon, Philippines	Philippines	Mangrove	8.9	13.1	122.05	Castillo et al. 2022	Alongi and Zimmer, 2024
430	Quezon, Philippines	Philippines	Mangrove	123	13.1	122.05	Castillo et al. 2022	Alongi and Zimmer, 2024
431	Quezon, Philippines	Philippines	Mangrove	226	13.1	122.05	Castillo et al. 2022	Alongi and Zimmer, 2024
432	Ayeyarwady delta, Myanmar	Myanmar	Mangrove	1370	17	95	Thant et al. 2012	Alongi and Zimmer, 2024
433	Red river, N. Vietnam	N. Vietnam	Mangrove	506	20.2167	106.517	Ha et al. 2018	Alongi and Zimmer, 2024
434	Red river, N. Vietnam	Vietnam	Mangrove	674	20.2167	106.517	Ha et al. 2018	Alongi and Zimmer, 2024
435	Red river, N. Vietnam	Vietnam	Mangrove	694	20.2167	106.517	Ha et al. 2018	Alongi and Zimmer, 2024
436	Red river, N. Vietnam	Vietnam	Mangrove	770	20.2167	106.517	Ha et al. 2018	Alongi and Zimmer, 2024
437	Red river, N. Vietnam	Vietnam	Mangrove	804	20.2167	106.517	Ha et al. 2018	Alongi and Zimmer, 2024
438	Red river, N. Vietnam	Vietnam	Mangrove	817	20.2167	106.517	Ha et al. 2018	Alongi and Zimmer, 2024
439	Leizhou Bay, China	China	Mangrove	500	21.0278	110.221	Ren et al. 2010	Alongi and Zimmer, 2024
440	Leizhou Bay, China	China	Mangrove	790	21.0278	110.221	Ren et al. 2010	Alongi and Zimmer, 2024
441	Leizhou Bay, China	China	Mangrove	840	21.0278	110.221	Ren et al. 2010	Alongi and Zimmer, 2024
442	Leizhou Bay, China	China	Mangrove	870	21.0278	110.221	Ren et al. 2010	Alongi and Zimmer, 2024
443	Sundarbans, India	India	Mangrove	100	22	90	Uddin et al. 2023	Alongi and Zimmer, 2024
444	Sundarbans, India	India	Mangrove	110	22	90	Uddin et al. 2023	Alongi and Zimmer, 2024
445	Sundarbans, India	India	Mangrove	130	22	90	Uddin et al. 2023	Alongi and Zimmer, 2024
446	Sundarbans, India	India	Mangrove	170	22	90	Uddin et al. 2023	Alongi and Zimmer, 2024
447	Qi'ao Island, China	China	Mangrove	161	22.4	113.617	Yu et al. 2020	Alongi and Zimmer, 2024
448	Shenzhen Bay, China	China	Mangrove	500	22.5167	114.083	Chen et al. 2021	Alongi and Zimmer, 2024
449	Shenzhen Bay, China	China	Mangrove	700	22.5167	114.083	Chen et al. 2021	Alongi and Zimmer, 2024
450	Shenzhen Bay, China	China	Mangrove	2560	22.5167	114.083	Chen et al. 2021	Alongi and Zimmer, 2024
451	Shenzhen Bay, China	China	Mangrove	155	22.5167	114.083	Lunstrum and Chen. 2014	Alongi and Zimmer, 2024
452	Xiamen, China	China	Mangrove	44	24.6333	118.183	Ratul et al. 2022	Alongi and Zimmer, 2024
453	Xiamen, China	China	Mangrove	45	24.6333	118.183	Ratul et al. 2022	Alongi and Zimmer, 2024
454	Xiamen, China	China	Mangrove	50.3	24.6333	118.183	Ratul et al. 2022	Alongi and Zimmer, 2024
455	Luoyang R, China	China	Mangrove	33	24.95	118.667	Chen et al. 2021	Alongi and Zimmer, 2024
456	Luoyang R, China	China	Mangrove	108	24.95	118.667	Chen et al. 2021	Alongi and Zimmer, 2024
457	Biscayne Bay, Florida	Florida	Mangrove	123	26.1667	-79.75	Chomin-Virden, D. 2021	Alongi and Zimmer, 2024
458	Biscayne Bay, Florida	Florida	Mangrove	457	26.1667	-79.75	Chomin-Virden, D. 2021	Alongi and Zimmer, 2024
459	Tampa Bay, Florida	Florida	Mangrove	470	27.95	-81.5333	Dontis et al. 2020	Alongi and Zimmer, 2024
460	Tampa Bay, Florida	Florida	Mangrove	218	27.95	-81.5333	Osland et al. 2012	Alongi and Zimmer, 2024
461	Zhejiang, China	China	Mangrove	156	28	121	Gu and Wu, 2023	Alongi and Zimmer, 2024
462	Zhejiang, China	China	Mangrove	180	28	121	Gu and Wu, 2023	Alongi and Zimmer, 2024
463	Rookery Bay, FL, USA	United States of America	Mangrove	90	26	-81.7	Lynch et al. 1989	Breithaupt and Steinmuller, 2022
464	Rookery Bay, FL, USA	United States of America	Mangrove	99	26	-81.7	Lynch et al. 1989	Breithaupt and Steinmuller, 2022

## Sheet: seagrass
No	Name	Country	Ecosystem_type	Carbon_gCm2yr	Lat	Lon	Dating_method	Seagrass_status	Reference	Source
1	Ischia (Italy)	Italy	Seagrass	30	40.7372	13.9481	C14	Intact	Mateo et al., 1997	Serrano et al., 2016
2	Culip (Spain)	Spain	Seagrass	9	42.3214	3.3244	C14	Intact	Mateo et al., 1997	Serrano et al., 2016
3	Port-Lligat (Spain)	Spain	Seagrass	75	42.2959	3.2919	C14	Intact	Mateo et al., 1997	Serrano et al., 2016
4	Campello (Spain)	Spain	Seagrass	112.1	38.4274	-0.399	C14	Intact	Mateo et al., 1997	Serrano et al., 2016
5	Tabarca (Spain)	Spain	Seagrass	61.7	38.1654	-0.481	C14	Intact	Mateo et al., 1997	Serrano et al., 2016
6	Tabarca (Spain)	Spain	Seagrass	104.2	38.1654	-0.481	C14	Intact	Mateo et al., 1997	Serrano et al., 2016
7	Medas (Spain)	Spain	Seagrass	12.6	42.05	3.2236	C14	Intact	Mateo et al., 1997	Serrano et al., 2016
8	Portlligat (Spain)	Spain	Seagrass	76	42.2959	3.2919	C14	Intact	Mateo et al., 2005	Serrano et al., 2016
9	Villajoyosa (Spain)	Spain	Seagrass	40	38.5038	-0.2286	C14	Intact	Mateo et al., 2005	Serrano et al., 2016
10	Portlligat (Spain)	Spain	Seagrass	18	42.2959	3.2919	C14	Intact	Lo Iacono et al., 2008	Serrano et al., 2016
11	Portlligat (Spain)	Spain	Seagrass	22	42.2959	3.2919	C14	Intact	Serrano et al., 2012	Serrano et al., 2016
12	Talamanca Cove (Spain)	Spain	Seagrass	85.6	38.915	1.456	C14	Intact	Serrano et al., 2014	Serrano et al., 2016
13	Es Pujols Cove (Spain)	Spain	Seagrass	140.1	38.687	1.512	C14	Intact	Serrano et al., 2014	Serrano et al., 2016
14	Cockburn Sound (Western Australia)	Australia	Seagrass	6.35	-32.159	115.676	C14	Intact	Serrano et al., 2014	Serrano et al., 2016
15	Mellieha Bay (Malta)	Malta	Seagrass	10	35.97	14.356	C14	Intact	Serrano et al., 2016	Serrano et al., 2016
16	Salina Bay (Malta)	Malta	Seagrass	2	35.951	14.427	C14	Intact	Serrano et al., 2016	Serrano et al., 2016
17	Oyster Harbor (Australia)	Australia	Seagrass	2	-34.998	117.948	C14	Intact	Serrano et al., 2016	Serrano et al., 2016
18	Waychinicup Inlet (Australia)	Australia	Seagrass	2	-34.898	118.33	C14	Intact	Serrano et al., 2016	Serrano et al., 2016
19	Port Pirie (Australia)	Australia	Seagrass	3	-33.153	138.015	C14	Intact	Serrano et al., 2016	Serrano et al., 2016
20	Port Broughton (Australia)	Australia	Seagrass	2	-33.589	137.927	C14	Intact	Serrano et al., 2016	Serrano et al., 2016
21	Big Lagoon (Australia)	Australia	Seagrass	2	-25.769	113.443	C14	Intact	Serrano et al., 2016	Serrano et al., 2016
22	Shark Bay (Australia)	Australia	Seagrass	4.6	-25.5	113.5	C14	Intact	Arias-Ortiz et al. 2018	Eyre et al., 2023
23	Shark Bay (Australia)	Australia	Seagrass	11.3	-25.5	113.5	C14	Intact	Arias-Ortiz et al. 2018	Eyre et al., 2023
24	Shark Bay (Australia)	Australia	Seagrass	27	-25.5	113.5	210Pb	Intact	Arias-Ortiz et al. 2018	Eyre et al., 2023
25	Shark Bay (Australia)	Australia	Seagrass	13.4	-25.5	113.5	C14	Intact	Arias-Ortiz et al. 2018	Eyre et al., 2023
26	Shark Bay (Australia)	Australia	Seagrass	8.5	-25.5	113.5	C14	Intact	Arias-Ortiz et al. 2018	Eyre et al., 2023
27	Shark Bay (Australia)	Australia	Seagrass	15	-25.5	113.5	210Pb	Intact	Arias-Ortiz et al. 2018	Eyre et al., 2023
28	Shark Bay (Australia)	Australia	Seagrass	6.4	-25.5	113.5	C14	Intact	Arias-Ortiz et al. 2018	Eyre et al., 2023
29	Shark Bay (Australia)	Australia	Seagrass	23.1	-25.5	113.5	C14	Intact	Arias-Ortiz et al. 2018	Eyre et al., 2023
30	Ishigaki Island (Japan)	Japan	Seagrass	5.4	24.3333	124.1	C14	Intact	Miyajima et al. 2015	Eyre et al., 2023
31	Andaman Sea (Southern Thailand)	Thailand	Seagrass	2.4	8	98	C14	Intact	Miyajima et al. 2015	Eyre et al., 2023
32	Seto Inland Sea (Japan)	Japan	Seagrass	6.8	34	133	C14	Intact	Miyajima et al. 2015	Eyre et al., 2023
33	Moreton Bay (Australia), pre-European	Australia	Seagrass	1.7	-27.3333	153.333	C14	Restored	Samper-Villarreal et al. 2018	Eyre et al., 2023
34	Moreton Bay (Australia), pre-European	Australia	Seagrass	7.2	-27.3333	153.333	C14	Restored	Samper-Villarreal et al. 2018	Eyre et al., 2023
35	Moreton Bay (Australia)	Australia	Seagrass	8.9	-27.3333	153.333	C14	Restored	Samper-Villarreal et al. 2018	Eyre et al., 2023
36	Dongdae Bay (Korea)	Korea	Seagrass	59	35.1833	129.217	210Pb	Intact	Kim et al. 2022	Eyre et al., 2023
37	Deukryang Bay (Korea)	Korea	Seagrass	32.4	34.6	127.633	210Pb	Intact	Kim et al. 2022	Eyre et al., 2023
38	Gusan (Korea)	Korea	Seagrass	48.3	35.9667	126.717	210Pb	Intact	Kim et al. 2022	Eyre et al., 2023
39	Oyster Harbour (Western Australia)	Australia	Seagrass	28.2	-35	117.983	210Pb	Restored	Marba et al. 2015	Eyre et al., 2023
40	Alta Guajira (Colombian Caribbean)	Colombian Caribbean	Seagrass	4.5	12.1672	-72	C14	Intact	Serrano et al. 2021	Eyre et al., 2023
41	Media Guajira (Colombian Caribbean)	Colombian Caribbean	Seagrass	2.2	11.4167	-72	C14	Intact	Serrano et al. 2021	Eyre et al., 2023
42	San Andrés (Colombian Caribbean)	Colombian Caribbean	Seagrass	22.6	12.5833	-81.7	C14	Intact	Serrano et al. 2021	Eyre et al., 2023
43	Grace Bay, British Coloumbia (Canada)	Canada	Seagrass	10.5	49.65	-124.9	210Pb	Intact	Postlethwaite et al. 2018	Eyre et al., 2023
44	British Coloumbia (Canada)	Canada	Seagrass	22.3	53.7267	-127.648	210Pb	Intact	Prentice et al. 2019	Eyre et al., 2023
45	British Coloumbia (Canada)	Canada	Seagrass	7	53.7267	-127.648	210Pb	Intact	Spooner 2015	Eyre et al., 2023
46	Washington (USA)	USA	Seagrass	11.3	47.7511	-120.74	210Pb	Intact	Poope and Rybczk 2018	Eyre et al., 2023
47	Oyster Harbor (Australia)	Australia	Seagrass	6.37	-34.998	117.948	C14	Intact	Rozaimi et al. 2016	Miyajima and Hamaguchi 2019
48	Gulf of Gdansk	Poland	Seagrass	2.52	54.33	18.5	210Pb	Intact	Jankowska et al., 2016	Miyajima and Hamaguchi 2019
49	Furen lagoon	Japan	Seagrass	5.5	43.33	142.25	14C	Intact	Tokoro et al. (2014)	Miyajima and Hamaguchi 2019
50	Thuwal Island (Red Sea)	Red Sea	Seagrass	6.795	22.2818	39.085	14C	Intact	Serrano et al., 2018	this study
51	Economic City (Red Sea)	Red Sea	Seagrass	4.736	22.392	39.1303	14C	Intact	Serrano et al., 2018	this study
52	Petro Rabigh (Red Sea)	Red Sea	Seagrass	27.255	22.7529	39.0125	14C	Intact	Serrano et al., 2018	this study
53	Khor Alkharar (Red Sea)	Red Sea	Seagrass	4.19875	22.9719	38.8465	14C	Intact	Serrano et al., 2018	this study
54	Wallis Lake	Australia	Seagrass	67.75	-32.272	152.518	210Pb	Intact	Sanders et al., 2019	this study
55	Camden Haven	Australia	Seagrass	25.66	-31.6921	152.77	210Pb	Intact	Sanders et al., 2019	this study
56	Histings River	Australia	Seagrass	130	-31.3336	152.9	210Pb	Intact	Sanders et al., 2019	this study
57	Mondego (Portugal)	Portugal	Seagrass	40.36	40.319	8.227	210Pb	Intact	Mazarrasa et al., 2023	this study
58	Oyambre (Spain)	Spain	Seagrass	42.54	43.3844	4.338	210Pb	Intact	Mazarrasa et al., 2023	this study
59	Santander Bay (Spain)	Spain	Seagrass	56.9	43.4667	3.8	210Pb	Intact	Mazarrasa et al., 2023	this study
60	Santoña Marsches (Spain)	Spain	Seagrass	63.45	43.45	3.45	210Pb	Intact	Mazarrasa et al., 2023	this study
61	Great Exuma, Bahamas	Bahamas	Seagrass	27.6	23.81	-76.1633	210Pb	Intact	Fu et al., 2023	this study
62	Safaniya	Saudi Arabia	Seagrass	14	27.9736	48.774	210Pb	Intact	Cusack et al., 2018	this study
63	Abu-Ali	Saudi Arabia	Seagrass	10.45	27.2698	49.5455	210Pb	Intact	Cusack et al., 2018	this study
64	Ecopark	Saudi Arabia	Seagrass	5.4	26.7088	50.0123	210Pb	Intact	Cusack et al., 2018	this study
65	Uqair	Saudi Arabia	Seagrass	6	25.7289	50.2299	210Pb	Intact	Cusack et al., 2018	this study
66	San Quintín Bay	Mexico	Seagrass	81.5	30.4383	-116.012	210Pb	Intact	Cuellar-Martinez et al., 2020	this study
67	Cancún-Riviera Maya	Mexico	Seagrass	127	21.2161	-86.8111	210Pb	Intact	Cuellar-Martinez et al., 2020	this study
68	Términos Lagoon	Mexico	Seagrass	34.75	18.7556	-91.5556	210Pb	Intact	Cuellar-Martinez et al., 2020	this study
69	South Bay (USA)	USA	Seagrass	292	37.2741	-75.8156	210Pb	Restored	Oreska et al., 2020	this study
70	Ria Formosa Lagoon, Portugal	Portugal	Seagrass	49.87	36.99	-7.89	210Pb	Intact	Martins et al., 2021	this study
71	Benoa Bay, Bali	Bali	Seagrass	160	-8.78272	115.221	Derived	Intact	Dharmayasa et al., 2024	this study
72	Gåsö, Sweden	Sweden	Seagrass	2.64	58.236	11.394	210Pb	Intact	Dahl et al., 2024	this study
73	Nahant Harbor, US	USA	Seagrass	10.17	42.419	-70.922	210Pb	Intact	Lei et al., 2023	this study
74	Cockburn Sound (Western Australia)	Australia	Seagrass	25.5	-32.1598	115.673	210Pb	Intact	Serrano et al., 2016	this study
75	Puerto Morelos Mexico	Mexico	Seagrass	11.1	20.842	-86.877	210Pb	Intact	Sanchez-Rojas 2025	this study
76	Cancun Mexico	Mexico	Seagrass	38.4	21.025	-86.812	210Pb	Intact	Lopez-Mendoza 2020	this study
77	Menemsha Pond, US	USA	Seagrass	15	41.341	-70.769	210Pb	Intact	Schaefer 2024	this study
78	Hog Island Bay, US	USA	Seagrass	36.68	37.4	-75.8	210Pb	Restored	Greiner et al., 2013	this study

## Sheet: estuary
No	Name	Country	Ecosystem_type	Carbon_gCm2yr	Depth_below_seafloor_m	Sampling_sediment_depth_m	Lat	Lon	Reference	Source
1	DM49_4416_1	Russia	Estuary	1.9552	18	0.225	71.74	73.09	Cartapanis et al., 2016	Tegler et al., 2024
2	DM49_4417_1	Russia	Estuary	11.442	23	1.145	70.92	73.49	Cartapanis et al., 2016	Tegler et al., 2024
3	DM49_4415_1	Russia	Estuary	5.8025	25	0.425	72.78	73.44	Cartapanis et al., 2016	Tegler et al., 2024
4	DM49_4403_1	Russia	Estuary	56.768	26	2.525	73	79.93	Cartapanis et al., 2016	Tegler et al., 2024
5	BP99_04_07	Russia	Estuary	4.2834	32.3	0.1	73.41	79.67	Cartapanis et al., 2016	Tegler et al., 2024
9	Core A, Vellar Estuary	India	Estuary	7.5374	NA	NA	11.4744	79.781	Ranjanet al., 2011	Wilkinson et al., 2018
12	Sydney Harbour, Australia	Australia	Estuary	67.2	NA	NA	-33.8522	151.211	Tanner & Eyre 2019	Tanner & Eyre 2019
13	Hastings River, Australia	Australia	Estuary	14.4	NA	NA	-31.43	152.91	Maher and Eyre 2012	Tanner & Eyre 2019
14	Camden Haven, Australia	Australia	Estuary	51.6	NA	NA	-31.65	152.8	Maher and Eyre 2012	Tanner & Eyre 2019
15	Wallis Lake, Australia	Australia	Estuary	52.8	NA	NA	-32.2	152.5	Maher and Eyre 2012	Tanner & Eyre 2019
16	Southern Moreton Bay, Australia	Australia	Estuary	0.36	NA	NA	-27.7175	153.384	Eyre et al. 2011	Tanner & Eyre 2019
17	Moreton Bay, Australia	Australia	Estuary	0.12	NA	NA	-27.5	153.3	Eyre and McKee 2002	Tanner & Eyre 2019
18	New River Estuary, USA autotrophic	United States of America	Estuary	38.4	NA	NA	34.7	-77.4	Crosswell et al. 2017	Tanner & Eyre 2019
19	New River Estuary, USA heterotrophic	United States of America	Estuary	1.2	NA	NA	34.7	-77.4	Crosswell et al. 2017	Tanner & Eyre 2019
20	Narragansett Bay, USA	United States of America	Estuary	26.4	NA	NA	41.6	-71.35	Nixon et al. 1995	Tanner & Eyre 2019
22	Chesapeake Bay, USA	United States of America	Estuary	39.6	NA	NA	37.8	-76.1	Kemp et al. 1997	Tanner & Eyre 2019
24	BP00_38_02	Russia	Estuary	15.238	20	0.05	73.2	73.24	Cartapanis et al., 2016	Tegler et al., 2024
25	DM49_4410_1	Russia	Estuary	2.5758	21	0.525	71.61	83.32	Cartapanis et al., 2016	Tegler et al., 2024
26	C58, Gulf of Finland	Finland	Estuary	53	NA	NA	60.0463	23.4968	Valliuset al., 2015	Wilkinson et al., 2018

## Sheet: lagoon
No	Name	Country	Ecosystem_type	Carbon_gCm2yr	Lat	Lon	Dating_method	Site_description	Reference	Source
1	Buda Platja	Spain	Lagoon	110	40.6469	0.745757			Fennessy et al., 2019	this study
2	Altata-Ensenada del Pabell���n Lagoon Complex, Mexico	Mexico	Lagoon	40.7717	24.6102	-107.877	Pb210	middle of lagoon	Ruiz-Fernandezet.al., 2003	Wilkinson et al., 2018
3	Camden Haven, Australia	Australia	Lagoon	550	-31.6667	152.8	Pb210	depositional site, unvegetated	Maheret.al., 2012	Wilkinson et al., 2018
4	Celeston Lagoon, Mexico	Mexico	Lagoon	37.4721	20.927	-90.3444	Pb210	shallow, central lagoon	Gonneeaet.al., 2004	Wilkinson et al., 2018
5	Hastings River, Australia	Australia	Lagoon	92.4	-31.4034	152.833	Pb210	depositional site, unvegetated	Maheret.al., 2012	Wilkinson et al., 2018
6	Oyster Harbor, Australia	Australia	Lagoon	26.15	-34.9734	117.959	Pb210		Marbaet.al., 2015	Wilkinson et al., 2018
7	Oyster Harbor, Australia	Australia	Lagoon	22.9	-34.9734	117.959	Pb210		Marbaet.al., 2015	Wilkinson et al., 2018
8	Oyster Harbor, Australia	Australia	Lagoon	25.25	-34.9734	117.959	Pb210		Marbaet.al., 2015	Wilkinson et al., 2018
9	Saint Lucia, Saint Lucia	Saint Lucia	Lagoon	206	13.877	-60.8885	Pb210		Kuet.al., 2008	Wilkinson et al., 2018
10	Saint Lucia, Saint Lucia	Saint Lucia	Lagoon	104	13.877	-60.8885	Pb210		Kuet.al., 2008	Wilkinson et al., 2018
11	Saint Lucia, Saint Lucia	Saint Lucia	Lagoon	24	13.7628	-60.923	Pb210		Kuet.al., 2008	Wilkinson et al., 2018
12	Saint Lucia, Saint Lucia	Saint Lucia	Lagoon	223	13.7628	-60.923	Pb210		Kuet.al., 2008	Wilkinson et al., 2018
13	Saint Lucia, Saint Lucia	Saint Lucia	Lagoon	24	13.7628	-60.923	Pb210		Kuet.al., 2008	Wilkinson et al., 2018
14	South Bay, USA	USA	Lagoon	36.68	37.265	-75.8139	Pb210		Greineret.al., 2013	Wilkinson et al., 2018
15	Terminos Lagoon, Mexico	Mexico	Lagoon	35.0074	18.6248	-91.7924	Pb210		Gonneea et.al., 2004	Wilkinson et al., 2018
16	Wallis Lake, Australia	Australia	Lagoon	55.84	-32.2	152.45	Pb210	depositional site, unvegetated	Maher et.al., 2012	Wilkinson et al., 2018
17	Yuehu Lagoon, China	China	Lagoon	340	37.3494	122.573	Pb210	mud depositional site	Gaoet.al., 2004	Wilkinson et al., 2018
18	Imboassica lagoon	Brazil	Lagoon	40	-22.4101	-41.8323	Pb210	urbanised lagoon	Farias et al., 2024	this study

[truncated: 3 more sheets: fjord, nearshore ocean, continental shelf]
